# Supplementary material
Source: publisher site journal article supplement (https://www.dovepress.com/article/supplementary_file/589782/589782%20Revised%20Supplementary%20Materials.docx)
Supplement: Supplementary file 1 [file 589782%20Revised%20Supplementary%20Materials.docx]

**
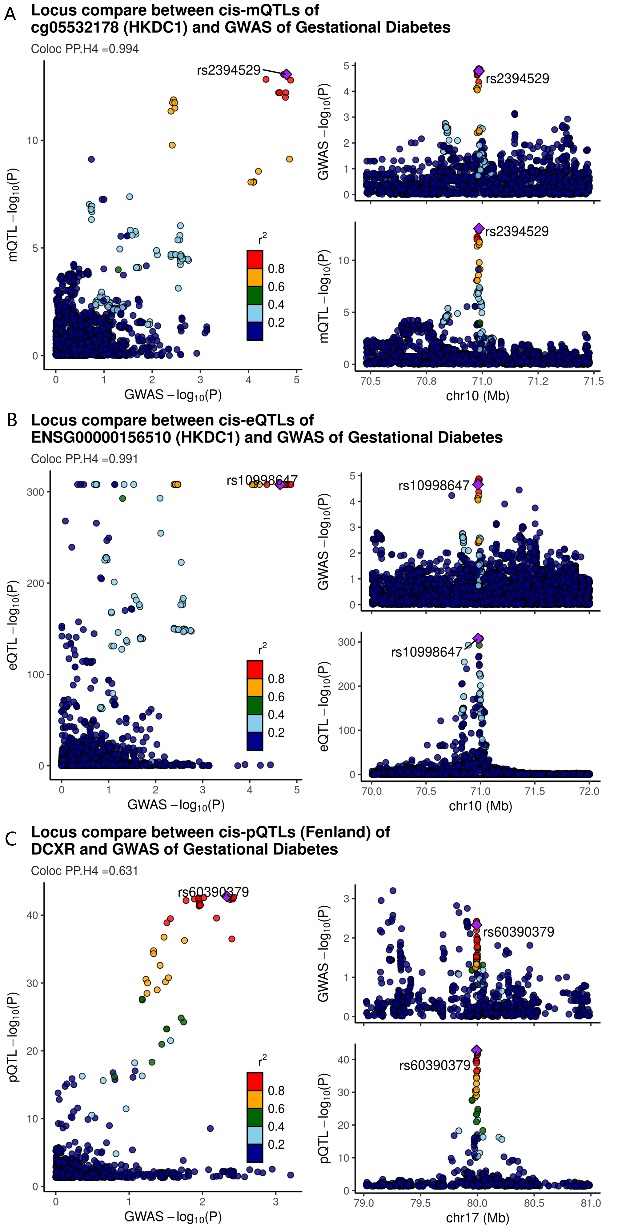
**

**Supplementary Figure S1. Representative colocalization plots for key GDM-associated molecular QTLs.** (A) Colocalization plot for the mQTL cg05532178 (annotated to *HKDC1*) and GDM. (B) Colocalization plot for the *HKDC1* eQTL and GDM. (C) Colocalization plot for the *DCXR* pQTL and GDM.

**
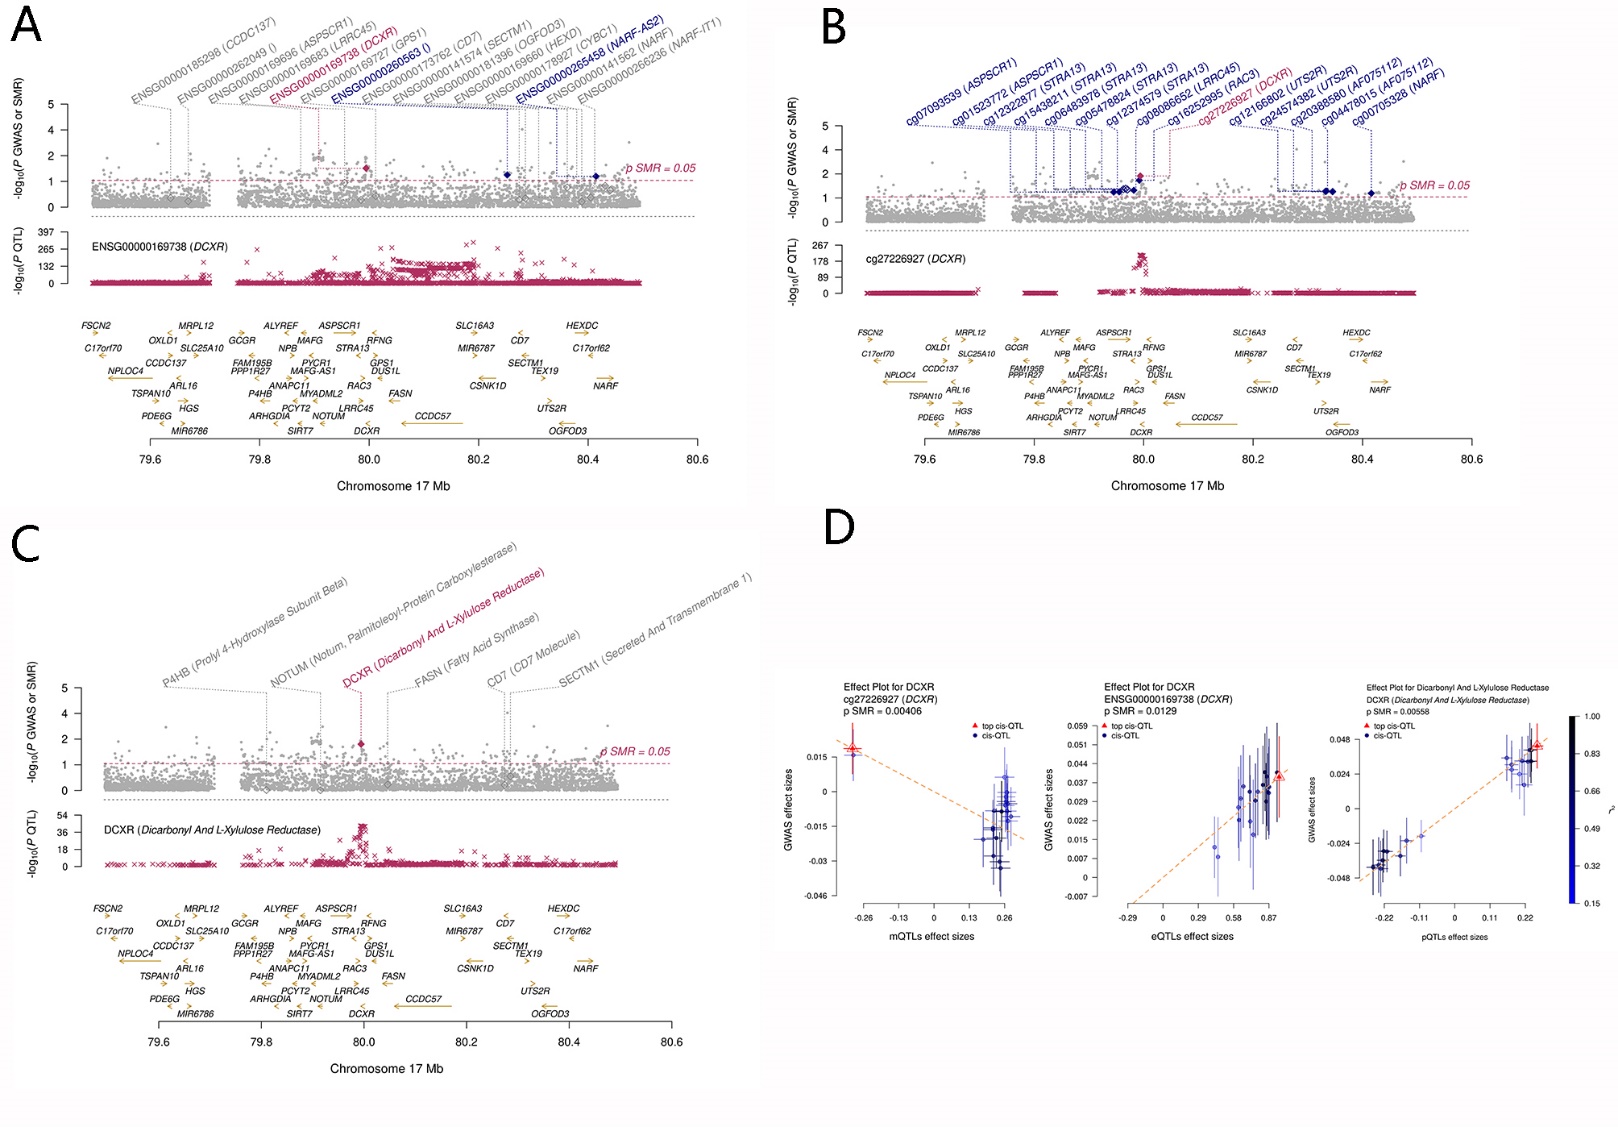
**

**Supplementary Figure S2. Representative Locus Plots for the *DCXR* gene region.** SMRLocusPlots showing genetic associations for (A) *DCXR* eQTLs, (B) mQTL cg27226927 (annotated to *DCXR*), and (C) *DCXR* pQTLs with GDM GWAS signals in the discovery cohort. The upper panel displays SMR analysis results for DNA methylation probes and GDM risk, where gray dots represent all tested probes, blue diamonds indicate significant probes (P < 0.05), and the red diamond highlights the top signal (cg272266927 in DCXR). The red dashed line denotes the significance threshold (P = 0.05). The middle panel shows eQTL/pQTL evidence for DCXR, with maroon crosses representing expression-associated genetic variants. The lower panel provides gene annotations, where yellow arrows indicate transcription direction (rightward for forward strand, leftward for reverse strand), (D) SMR effect plots for the DCXR gene region. These plots illustrate the correlation between the effect sizes of molecular quantitative trait loci (mQTL, eQTL, and pQTL) and the effect sizes of GDM GWAS.

**
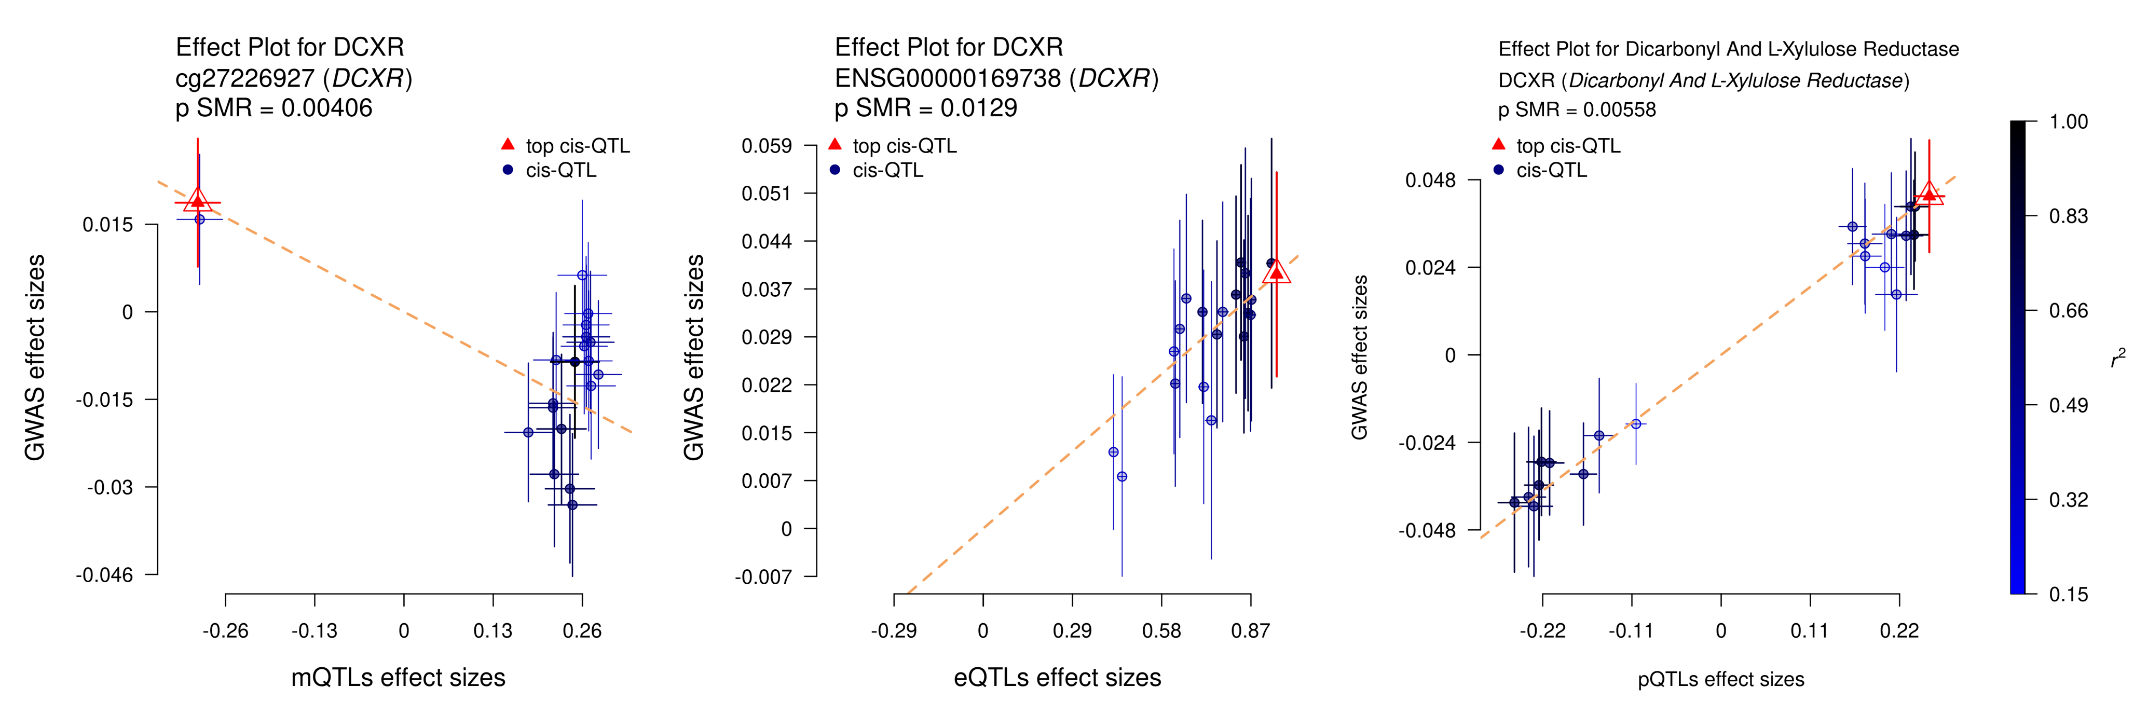
Supplementary Figure S3. SMREffectPlot for *DCXR*-related mQTLs, eQTLs, pQTLs and GDM GWAS results.** Plot illustrating the relationship between the effect sizes of SNPs on the molecular QTLs and their effect sizes on GDM for *DCXR*-related associations.

Box S1. Gene-list of lipid metabolism from KEGG and MSigDB.

| AACSA2:F126 | CAB39L | FABP9 | LRTOMT | PHGDH | RELA |
| --- | --- | --- | --- | --- | --- |
| ABCA1 | CAMKK2 | FADS1 | LSS | PHOSPHO1 | RGL1 |
| ABCB11 | CARM1 | FADS2 | LTA4H | PHYH | RORA |
| ABCB4 | CAS1 | FAM120B | LTC4S | PI4K2A | RRAS |
| ABCC1 | CAV1 | FAM213B | LYPLA1 | PI4K2B | RUFY1 |
| ABCC3 | CBR1 | FAM73A | LYPLA2 | PI4KA | RXRA |
| ABCD1 | CBR3 | FAM73B | MAOA | PI4KB | RXRB |
| ABCD3 | CBR4 | FAR1 | MAOB | PIAS4 | RXRG |
| ABCG5 | CCNC | FAR2 | MAP3K7 | PIK3C2A | SACM1L |
| ABCG8 | CCND3 | FASN | MAPK10 | PIK3C2B | SAMD8 |
| ABHD17 | CD36 | FDFT1 | MAPK8 | PIK3C2G | SAR1B |
| ABHD3 | CDIPT | FDPS | MAPK9 | PIK3C3 | SBF1 |
| ABHD4 | CDK19 | FDX1 | MAPKAPK2 | PIK3CA | SBF2 |
| ABHD5 | CDK4 | FDX1L | MBOAT1 | PIK3CB | SC5D |
| AC092724.1 | CDK8 | FDXR | MBOAT2 | PIK3CD | SC5DL |
| ACAA1 | CDS1 | FHL2 | MBOAT7 | PIK3CG | SCAP |
| ACAA2 | CDS2 | FIG4 | MBTPS1 | PIK3R1 | SCARB1 |
| ACACA | CEBPA | FITM1 | MBTPS2 | PIK3R2 | SCD |
| ACACB | CEBPB | FITM2 | MCAT | PIK3R3 | SCD5 |
| ACAD10 | CEBPD | G0S2 | MCEE | PIK3R4 | SCP2 |
| ACAD11 | CEL | G6PC | ME1 | PIK3R5 | SEC23A |
| ACADL | CEPT1 | G6PC2 | ME3 | PIK3R6 | SEC24A |
| ACADM | CERK | G6PC3 | MECR | PIKFYVE | SEC24B |
| ACADS | CERS1 | GAB1 | MED1 | PIP4K2A | SEC24C |
| ACADSB | CERS2 | GAB2 | MED10 | PIP4K2B | SEC24D |
| ACADVL | CERS3 | GAL3ST1 | MED11 | PIP4K2C | SELENOI |
| ACAT1 | CERS4 | GALC | MED12 | PIP5K1A | SGMS1 |
| ACAT2 | CERS5 | GAMT | MED13 | PIP5K1B | SGMS2 |
| ACBD4 | CERS6 | GATM | MED13L | PIP5K1C | SGPL1 |
| ACBD5 | CETP | GBA | MED14 | PISD | SGPP1 |
| ACBD6 | CGA | GBA2 | MED15 | PITPNB | SGPP2 |
| ACBD7 | CH25H | GC | MED16 | PITPNM1 | SHC1 |
| ACER1 | CHAT | GCAT | MED17 | PITPNM2 | SHC2 |
| ACER2 | CHD9 | GCDH | MED18 | PITPNM3 | SHC3 |
| ACER3 | CHKA | GCSH | MED19 | PLA1A | SHC4 |
| ACHE | CHKB | GDE1 | MED20 | PLA2G10 | SHMT1 |
| ACLY | CHPT1 | GDPD1 | MED21 | PLA2G12A | SHMT2 |
| ACOT1 | CHUK | GDPD3 | MED22 | PLA2G12B | SIN3A |
| ACOT1_2_4 | CIDEA | GDPD5 | MED23 | PLA2G15 | SIN3B |
| ACOT11 | CIDEC | GGPS1 | MED24 | PLA2G16 | SLC10A1 |
| ACOT12 | CLOCK | GGT1 | MED25 | PLA2G1B | SLC10A2 |
| ACOT13 | COL4A3BP | GGT5 | MED26 | PLA2G2A | SLC22A5 |
| ACOT2 | COMT | GK | MED27 | PLA2G2C | SLC25A1 |
| ACOT4 | CPNE1 | GK2 | MED28 | PLA2G2D | SLC25A17 |
| ACOT6 | CPNE3 | GLA | MED29 | PLA2G2E | SLC25A20 |
| ACOT7 | CPNE6 | GLB1 | MED30 | PLA2G2F | SLC27A1 |
| ACOT8 | CPNE7 | GLB1L | MED31 | PLA2G3 | SLC27A2 |
| ACOT9 | CPT1A | GLDC | MED4 | PLA2G4A | SLC27A3 |
| ACOX1 | CPT1B | GLIPR1 | MED6 | PLA2G4B | SLC27A4 |
| ACOX2 | CPT1C | GLTP | MED7 | PLA2G4C | SLC27A5 |
| ACOX3 | CPT2 | GLYCTK | MED8 | PLA2G4D | SLC27A6 |
| ACOXL | CPTP | GM2A | MED9 | PLA2G4E | SLC2A1 |
| ACP6 | CRAT | GNA11 | MESO1 | PLA2G4F | SLC2A4 |
| ACSBG1 | CREB1 | GNAI1 | MFSD2A | PLA2G5 | SLC44A1 |
| ACSBG2 | CREB3 | GNAI2 | MGLL | PLA2G6 | SLC44A2 |
| ACSF2 | CREB3L1 | GNAI3 | MID1IP1 | PLA2G7 | SLC44A3 |
| ACSF3 | CREB3L2 | GNAQ | MLYCD | PLA2R1 | SLC44A4 |
| ACSL1 | CREB3L3 | GNAS | MMAA | PLB1 | SLC44A5 |
| ACSL3 | CREB3L4 | GNPAT | MMP1 | PLBD1 | SLCO1A2 |
| ACSL4 | CREB5 | GPAM | MOGAT1 | PLCB1 | SLCO1B1 |
| ACSL5 | CREBBP | GPAT2 | MOGAT2 | PLCB2 | SLCO1B3 |
| ACSL6 | CRLS1 | GPAT3 | MOGAT3 | PLCB3 | SMARCD3 |
| ACSM3 | CROT | GPAT4 | MORC2 | PLCB4 | SMO1 |
| ACSM6 | CSNK1G2 | GPCPD1 | MPV17 | PLD1 | SMPD1 |
| ACSS3 | CSNK2A1 | GPD1 | MPV17L | PLD2 | SMPD2 |
| ADCY1 | CSNK2A2 | GPD1L | MPV17L2 | PLD3 | SMPD3 |
| ADCY2 | CSNK2B | GPD2 | MRAS | PLD4 | SMPD4 |
| ADCY3 | CTSA | GPS2 | MSMO1 | PLD6 | SMT1 |
| ADCY4 | CUBN | GPX1 | MTF1 | PLEKHA1 | SOAT |
| ADCY5 | CYP105A1 | GPX2 | MTM1 | PLEKHA2 | SOAT1 |
| ADCY6 | CYP11A1 | GPX3 | MTMR1 | PLEKHA3 | SOAT2 |
| ADCY7 | CYP11B1 | GPX4 | MTMR10 | PLEKHA4 | SOCS3 |
| ADCY8 | CYP11B2 | GPX5 | MTMR12 | PLEKHA5 | SORBS1 |
| ADCY9 | CYP17A1 | GPX6 | MTMR14 | PLEKHA6 | SORT1 |
| ADIPOQ | CYP19A1 | GPX7 | MTMR2 | PLEKHA8 | SOS1 |
| ADIPOR1 | CYP1A1 | GPX8 | MTMR3 | PLIN1 | SOS2 |
| ADIPOR2 | CYP1A2 | GRB2 | MTMR4 | PLIN2 | SP1 |
| ADIRF | CYP1B1 | GRHL1 | MTMR6 | PLIN3 | SPHK1 |
| ADORA1 | CYP21A2 | GRHPR | MTMR7 | PLIN4 | SPHK2 |
| ADPRM | CYP24A1 | GSTM4 | MTMR8 | PLIN5 | SPTLC1 |
| ADRA1A | CYP27A1 | HACD | MTMR9 | PLPP1 | SPTLC2 |
| ADRB1 | CYP27B1 | HACD1 | MTOR | PLPP2 | SPTLC3 |
| ADRB2 | CYP2B6 | HACD2 | MUT | PLPP3 | SPTSSA |
| ADRB3 | CYP2C19 | HACD3 | MVD | PLPP4 | SPTSSB |
| AGK | CYP2C8 | HACD4 | MVK | PLPP5 | SQL |
| AGMO | CYP2C9 | HACL1 | MYLIP | PLTP | SQLE |
| AGPAT1 | CYP2D6 | HADH | NCEH1 | PMVK | SRD5A1 |
| AGPAT2 | CYP2E1 | HADHA | NCOA1 | PNLIP | SRD5A2 |
| AGPAT3 | CYP2J2 | HADHB | NCOA2 | PNLIPRP1 | SRD5A3 |
| AGPAT4 | CYP2R1 | HAO2 | NCOA3 | PNLIPRP2 | SREBF1 |
| AGPAT5 | CYP2U1 | HDAC3 | NCOA6 | PNLIPRP3 | SREBF2 |
| AGPAT6 | CYP39A1 | HELZ2 | NCOR1 | PNPLA2 | STAR |
| AGPAT9 | CYP3A4 | HEXA | NCOR2 | PNPLA3 | STARD10 |
| AGPS | CYP3A5 | HEXB | NDUFAB1 | PNPLA4 | STARD3 |
| AGRP | CYP3A7 | HILPDA | NEU1 | PNPLA5 | STARD3NL |
| AGT | CYP3A7-CYP3A51P | HMGCL | NEU2 | PNPLA6 | STARD4 |
| AGTR1 | CYP46A1 | HMGCLL1 | NEU3 | PNPLA7 | STARD5 |
| AGXT | CYP4A11 | HMGCR | NEU4 | PNPLA8 | STARD6 |
| AGXT2 | CYP4A22 | HMGCS1 | NFKB1 | POMC | STARD7 |
| AHR | CYP4B1 | HMGCS2 | NFKBIA | PON1 | STAT3 |
| AHRR | CYP4F11 | HPGD | NFKBIB | PON2 | STK11 |
| AKR1A1 | CYP4F2 | HPGDS | NFKBIE | PON3 | STRADA |
| AKR1B1 | CYP4F22 | HRAS | NFYA | PPAP2A | STRADB |
| AKR1B10 | CYP4F3 | HRASLS | NFYB | PPAP2B | STS |
| AKR1B15 | CYP4F8 | HRASLS2 | NFYC | PPAP2C | SULT1E1 |
| AKR1C1 | CYP51 | HRASLS5 | NPAS2 | PPAPDC1A | SULT2A1 |
| AKR1C2 | CYP51A1 | HSD11B1 | NPC1 | PPAPDC1B | SULT2B1 |
| AKR1C3 | CYP7A1 | HSD11B2 | NPC2 | PPAPDC2 | SUMF1 |
| AKR1C4 | CYP7B1 | HSD17B1 | NPPA | PPARA | SUMF2 |
| AKR1D1 | CYP8B1 | HSD17B11 | NPR1 | PPARD | SUMO2 |
| AKT1 | DAO | HSD17B12 | NPY | PPARG | SYNJ1 |
| AKT2 | DBI | HSD17B13 | NPY1R | PPARGC1A | SYNJ2 |
| AKT3 | DDHD1 | HSD17B14 | NR1D1 | PPARGC1B | TAZ |
| ALAS1 | DDHD2 | HSD17B2 | NR1H2 | PPM1L | TBL1X |
| ALAS2 | DECR1 | HSD17B3 | NR1H3 | PPP1CA | TBL1XR1 |
| ALB | DECR2 | HSD17B4 | NR1H4 | PPP1CB | TBXAS1 |
| ALDH1B1 | DEGS1 | HSD17B6 | NR2F2 | PPP1CC | TECR |
| ALDH2 | DEGS2 | HSD17B7 | NRAS | PPP2CA | TECRL |
| ALDH3A2 | DGAT1 | HSD17B8 | NRF1 | PPP2CB | TER |
| ALDH3B1 | DGAT2 | HSD3B1 | NSDHL | PPP2R1A | TGFB1 |
| ALDH3B2 | DGAT2L6 | HSD3B2 | NUDT19 | PPP2R1B | TGL4 |
| ALDH7A1 | DGKA | HSD3B7 | OCRL | PPP2R2A | TGS1 |
| ALDH9A1 | DGKB | HTD2 | OLAH | PPP2R2B | THEM4 |
| ALOX12 | DGKD | IDI1 | OLR1 | PPP2R2C | THEM5 |
| ALOX12B | DGKE | IDI2 | ORMDL1 | PPP2R2D | THRAP3 |
| ALOX15 | DGKG | IKBKB | ORMDL2 | PPP2R3A | THRSP |
| ALOX15B | DGKH | IKBKG | ORMDL3 | PPP2R3B | TIAM2 |
| ALOX5 | DGKI | INPP4A | OSBP | PPP2R3C | TKFC |
| ALOX5AP | DGKK | INPP4B | OSBPL10 | PPP2R5B | TM7SF2 |
| ALOXE3 | DGKQ | INPP5D | OSBPL1A | PPP2R5C | TMEM55B |
| ALPI | DGKZ | INPP5E | OSBPL2 | PPP2R5D | TMEM86B |
| AMACR | DHCR24 | INPP5F | OSBPL3 | PPP2R5E | TNF |
| AMT | DHCR7 | INPP5J | OSBPL5 | PPT | TNFAIP8 |
| ANGPTL3 | DHRS7B | INPP5K | OSBPL6 | PPT1 | TNFAIP8L1 |
| ANGPTL4 | DLD | INPPL1 | OSBPL7 | PPT2 | TNFAIP8L2 |
| ANGPTL8 | DPEP1 | INS | OSBPL8 | PRKAA1 | TNFAIP8L3 |
| ANKRD1 | DPEP2 | INSIG1 | OSBPL9 | PRKAA2 | TNFRSF1A |
| AOC2 | DPEP3 | INSIG2 | OXCT1 | PRKAB1 | TNFRSF1B |
| AOC3 | EBF1 | INSR | OXCT2 | PRKAB2 | TNFRSF21 |
| APOA1 | EBP | IRS1 | OXSM | PRKACA | TPTE |
| APOA2 | ECHS1 | IRS2 | PAFAH1B1 | PRKACB | TPTE2 |
| APOA3 | ECI1 | IRS4 | PAFAH1B2 | PRKACG | TRADD |
| APOA4 | ECI2 | ITPR1 | PAFAH1B3 | PRKAG1 | TRAF2 |
| APOA5 | EGF | ITPR2 | PAFAH2 | PRKAG2 | TRIB3 |
| APOB | EGFR | ITPR3 | PCCA | PRKAG3 | TSHB |
| APOC1 | EGR2 | JAK2 | PCCB | PRKCA | TSHR |
| APOC2 | EHHADH | JMJD7-PLA2G4B | PCK1 | PRKCB | TSPO |
| APOC3 | ELO2 | KCS | PCK2 | PRKCE | TXNRD1 |
| APOE | ELO3 | KDSR | PCSK9 | PRKCG | UBE2I |
| APOH | ELOVL1 | KIT | PCTP | PRKCQ | UBE2V1 |
| AQP7 | ELOVL2 | KITLG | PCYT1A | PRKD1 | UGCG |
| ARF1 | ELOVL3 | KLF4 | PCYT1B | PRKD2 | UGT1A1 |
| ARF3 | ELOVL4 | KLF5 | PCYT2 | PRKD3 | UGT1A10 |
| ARNT | ELOVL5 | KPNB1 | PDE3B | PRKG1 | UGT1A3 |
| ARNT2 | ELOVL6 | KRAS | PDGFA | PRKG2 | UGT1A4 |
| ARNTL | ELOVL7 | LBR | PDGFB | PSAP | UGT1A5 |
| ARSA | ENPP2 | LCAT | PDGFC | PSAT1 | UGT1A6 |
| ARSB | ENPP6 | LCLAT1 | PDGFD | PSPH | UGT1A7 |
| ARSD | ENPP7 | LDLR | PDGFRA | PTDSS1 | UGT1A8 |
| ARSE | EP300 | LDLRAP1 | PDGFRB | PTDSS2 | UGT1A9 |
| ARSF | EPHX2 | LEP | PECR | PTEN | UGT2A1 |
| ARSG | EPT1 | LEPR | PEDS1 | PTGDS | UGT2A2 |
| ARSH | ERG2 | LGMN | PEMT | PTGER3 | UGT2A3 |
| ARSI | ERG27 | LHB | PEX1 | PTGES | UGT2B10 |
| ARSJ | ERG4 | LIPA | PEX10 | PTGES2 | UGT2B11 |
| ARSK | ERG5 | LIPC | PEX11A | PTGES3 | UGT2B15 |
| ARV1 | ESRRA | LIPE | PEX11B | PTGIS | UGT2B17 |
| ASAH1 | ESYT1 | LIPF | PEX11G | PTGR1 | UGT2B28 |
| ASAH2 | ESYT2 | LIPG | PEX12 | PTGR2 | UGT2B4 |
| ASPG | ESYT3 | LIPH | PEX13 | PTGS1 | UGT2B7 |
| ATF2 | ETNK1 | LIPI | PEX14 | PTGS2 | UGT8 |
| ATF4 | ETNK2 | LPA | PEX16 | PTPLAD1 | VAC14 |
| AWAT1 | ETNPPL | LPCAT1 | PEX19 | PTPLAD2 | VAPA |
| AWAT2 | FA2H | LPCAT2 | PEX2 | PTPLB | VAPB |
| B3GALNT1 | FAAH | LPCAT3 | PEX26 | PTPMT1 | VDAC1 |
| B4GALNT1 | FAAH2 | LPCAT4 | PEX3 | PTPN11 | VDAC2 |
| B4GALT6 | FABP1 | LPGAT1 | PEX5 | PTPN13 | VDAC3 |
| BAAT | FABP12 | LPIN1 | PEX5L | PXMP2 | VDR |
| BCHE | FABP2 | LPIN2 | PEX6 | PXMP4 | WNT1 |
| BDH1 | FABP3 | LPIN3 | PEX7 | RAB14 | WNT10B |
| BDH2 | FABP4 | LPL | PGAM1 | RAB4A | ZNF467 |
| BMX | FABP5 | LRP1 | PGAM2 | RAB5A | ZNF638 |
| BPGM | FABP6 | LRP2 | PGAM4 | RAN |  |
| BZRAP1 | FABP7 | LRPAP1 | PGS1 | RARRES3 |  |

Box S2. The list of carbohydrate metabolism-related gene.

| Gene symbol |  |  |  |  |  |  |  |
| --- | --- | --- | --- | --- | --- | --- | --- |
| HK3 | ADH1B | DLST | UGT1A4 | TKFC | NAGK | PCCB | L2HGDH |
| HK1 | ADH1C | SUCLG1 | UGT1A1 | GALK1 | AMDHD2 | MMUT | GAD1 |
| HK2 | ADH7 | SUCLG2 | UGT1A3 | GALT | GNPDA1 | HAO2 | GAD2 |
| HKDC1 | ADH4 | SUCLA2 | UGT2B10 | GALE | GNPDA2 | HAO1 | ALDH5A1 |
| GCK | ADH5 | SDHA | UGT1A9 | GLB1 | GFPT2 | CAT | HMGCS1 |
| GPI | ADH6 | SDHB | UGT2B7 | LCT | GFPT1 | PGP | HMGCS2 |
| PFKM | AKR1A1 | SDHC | UGT1A10 | LALBA | GNPNAT1 | AGXT | HMGCL |
| PFKP | ALDH2 | SDHD | UGT1A8 | B4GALT1 | PGM3 | GLUL | HMGCLL1 |
| PFKL | ALDH3A2 | FH | UGT1A5 | B4GALT2 | GALK2 | SHMT2 | OXCT1 |
| FBP1 | ALDH1B1 | MDH1 | UGT2B15 | GLA | UAP1 | SHMT1 | OXCT2 |
| FBP2 | ALDH7A1 | MDH2 | UGT1A7 | MGAM | UAP1L1 | GLDC | AACS |
| ALDOC | ALDH9A1 | PC | UGT2B4 | MGAM2 | GNE | AMT | BDH1 |
| ALDOA | ALDH3B1 | G6PD | UGT2A2 | GAA | RENBP | GCSH | BDH2 |
| ALDOB | ALDH3B2 | PGLS | UGDH | GANC | NANS | HYI | PIK3C3 |
| TPI1 | ALDH3A1 | H6PD | UGP2 | SI | NANP | HOGA1 | MTM1 |
| GAPDH | ACSS1 | PGD | CRYL1 | MIOX | NPL | AFMID | MTMR1 |
| GAPDHS | ACSS2 | RPE | XYLB | ENPP1 | CMAS | ACSS3 | MTMR2 |
| PGK2 | GALM | RPEL1 | AKR1B1 | ENPP3 | CYB5R1 | BCKDHA | MTMR3 |
| PGK1 | PGM1 | TKT | AKR1B10 | GBA3 | CYB5R3 | BCKDHB | MTMR4 |
| PGAM1 | PGM2 | TKTL2 | DCXR | GYS2 | CYB5R2 | DBT | MTMR8 |
| PGAM2 | G6PC1 | TKTL1 | SORD | GYS1 | CYB5RL | ACADS | MTMR6 |
| PGAM4 | G6PC2 | TALDO1 | DHDH | GYG1 | CYB5R4 | ACOX3 | MTMR7 |
| ENO3 | G6PC3 | RPIA | CRPPA | GYG2 | UXS1 | ACOX1 | MTMR14 |
| ENO2 | ADPGK | DERA | MPI | GBE1 | ACACA | HADHA | PI4KA |
| ENO1 | BPGM | RBKS | PMM2 | PYGL | ACACB | EHHADH | PI4KB |
| ENO4 | MINPP1 | PRPS1L1 | PMM1 | PYGM | ACYP2 | ECHS1 | PI4K2A |
| PKM | PCK1 | PRPS2 | GMPPB | PYGB | ACYP1 | HIBCH | PI4K2B |
| PKLR | PCK2 | PRPS1 | GMPPA | AGL | ACOT12 | MLYCD | SACM1L |
| PDHA2 | CS | RGN | GMDS | AMY1C | LDHD | ABAT | INPP5F |
| PDHA1 | ACLY | IDNK | GFUS | AMY2A | GLO1 | ECHDC1 | PIP5K1C |
| PDHB | ACO2 | GLYCTK | FPGT | AMY1A | HAGH | ALDH6A1 | PIP5K1A |
| DLAT | ACO1 | GUSB | FCSK | AMY2B | GRHPR | HADH | PIP5K1B |
| DLD | IDH1 | KL | ENOSF1 | AMY1B | ME2 | ACSM1 | PIP5KL1 |
| LDHAL6A | IDH2 | UGT2A1 | PFKFB1 | TREH | ME3 | ACSM2A | OCRL |
| LDHAL6B | IDH3B | UGT2A3 | PFKFB2 | PGM2L1 | ME1 | ACSM4 | INPP5B |
| LDHA | IDH3G | UGT2B17 | PFKFB3 | CHIA | ACAT2 | ACSM5 | INPP5E |
| LDHB | IDH3A | UGT2B11 | PFKFB4 | CHIT1 | ACAT1 | ACSM3 | SYNJ1 |
| LDHC | OGDHL | UGT2B28 | TIGAR | HEXA | MCEE | ACSM2B | SYNJ2 |
| ADH1A | OGDH | UGT1A6 | KHK | HEXB | PCCA | ACSM6 | PIK3CA |
| PLCH2 | PLCG1 | PLCD1 | PLCB1 | FIG4 | PIK3C2B | INPP5D | PIK3CD |
| IMPA2 | PLCG2 | PLCD3 | PLCB2 | PIP4K2C | INPP4A | INPPL1 | PIK3CB |
| IMPA1 | PLCZ1 | PLCD4 | PLCB3 | PIP4K2A | INPP4B | PIK3C2G | PIK3CG |
| CDIPT | PLCH1 | PLCE1 | PLCB4 | PIP4K2B | PIKFYVE | PIK3C2A | PTEN |
| ISYNA1 | INPP5A | INPP5J | ITPKA | ITPK1 | IPPK | IPMK | ITPKC |
| INPP1 | INPP5K | ITPKB |  |  |  |  |  |

| Supplementary Table S1A. Summary of significant SMR associations for blood mQTLs with GDM risk in the FinnGen discovery cohort. | | | | | |
| --- | --- | --- | --- | --- | --- |
| **probeID** | **Gene Symbol** | **p SMR** | **p FDR** | **p HEIDI** | **OR SMR (95% CI)** |
| cg20959480 | AACS | 0.026 | 0.584 | 0.787 | 1.05 (1.01 - 1.09) |
| cg13348062 | AACS | 0.042 | 0.622 | 0.771 | 1.08 (1 - 1.17) |
| cg06287003 | AACS | 0.018 | 0.532 | 0.944 | 0.97 (0.94 - 0.99) |
| cg06987292 | AACS | 0.026 | 0.584 | 0.93 | 0.91 (0.85 - 0.99) |
| cg02766259 | AACS | 0.024 | 0.571 | 0.962 | 0.94 (0.88 - 0.99) |
| cg14519518 | ABCA1 | 0.025 | 0.584 | 0.142 | 1.04 (1.01 - 1.08) |
| cg01332683 | ABCC1 | 0.037 | 0.62 | 0.988 | 0.9 (0.82 - 0.99) |
| cg23907586 | ACADS | 0.048 | 0.629 | 0.46 | 1.03 (1 - 1.06) |
| cg06196801 | ACADS | 0.05 | 0.641 | 0.516 | 1.04 (1 - 1.09) |
| cg09813248 | ACADS | 0.031 | 0.604 | 0.153 | 1.05 (1 - 1.11) |
| cg06793505 | ACADS | 0.049 | 0.635 | 0.553 | 1.04 (1 - 1.09) |
| cg06366792 | ACADS | 0.027 | 0.591 | 0.77 | 1.07 (1.01 - 1.14) |
| cg26750139 | ACBD6 | 0.021 | 0.563 | 0.956 | 1.15 (1.02 - 1.29) |
| cg08929083 | ACOT13 | 0.036 | 0.62 | 0.365 | 0.92 (0.85 - 0.99) |
| cg21233517 | ACOT4 | 0.031 | 0.604 | 0.807 | 0.92 (0.86 - 0.99) |
| cg10733249 | ACOT4 | 0.025 | 0.573 | 0.648 | 0.87 (0.77 - 0.98) |
| cg13197457 | ACOT4 | 0.027 | 0.591 | 0.969 | 0.95 (0.91 - 0.99) |
| cg01675153 | ACOT6 | 0.033 | 0.605 | 0.724 | 0.91 (0.83 - 0.99) |
| cg22012981 | ACOX2 | 0.028 | 0.591 | 0.7 | 1.15 (1.01 - 1.29) |
| cg07688988 | ACOXL | 0.035 | 0.62 | 0.857 | 1.14 (1.01 - 1.3) |
| cg16206125 | ACOXL | 0.046 | 0.622 | 0.84 | 1.14 (1 - 1.31) |
| cg09264377 | ACP6 | 0.018 | 0.532 | 0.436 | 0.89 (0.81 - 0.98) |
| cg18660278 | ACSBG2 | 0.046 | 0.622 | 0.224 | 0.9 (0.82 - 1) |
| cg10265258 | ACSF3 | 0.046 | 0.622 | 0.111 | 1.03 (1 - 1.05) |
| cg07944420 | ACSF3 | 0.046 | 0.622 | 0.147 | 1.02 (1 - 1.05) |
| cg03977443 | ACSL1 | 0.003 | 0.254 | 0.87 | 0.83 (0.74 - 0.94) |
| cg27112742 | ACSL1 | 0.001 | 0.199 | 0.747 | 1.09 (1.04 - 1.15) |
| cg06293172 | ADCY3 | 0.015 | 0.514 | 0.587 | 0.92 (0.85 - 0.98) |
| cg11023668 | ADCY3 | 6.51E-06 | 0.013 | 0.915 | 0.96 (0.94 - 0.97) |
| cg26038461 | ADCY3 | 1.90E-05 | 0.023 | 0.645 | 0.89 (0.85 - 0.94) |
| cg04586622 | ADCY3 | 8.19E-06 | 0.013 | 0.904 | 1.06 (1.03 - 1.09) |
| cg20518994 | ADCY3 | 4.25E-05 | 0.03 | 0.817 | 1.09 (1.05 - 1.14) |
| cg26752663 | ADCY3 | 8.34E-04 | 0.176 | 0.31 | 0.81 (0.71 - 0.92) |
| cg16888658 | ADCY3 | 5.30E-04 | 0.136 | 0.223 | 0.94 (0.91 - 0.97) |
| cg15423357 | ADCY3 | 4.24E-05 | 0.03 | 0.317 | 1.06 (1.03 - 1.1) |
| cg01884057 | ADCY3 | 2.82E-05 | 0.027 | 0.464 | 1.05 (1.03 - 1.07) |
| cg02098786 | ADCY4 | 0.042 | 0.622 | 0.531 | 1.03 (1 - 1.06) |
| cg26279745 | ADCY4 | 0.042 | 0.622 | 0.448 | 1.03 (1 - 1.06) |
| cg05185634 | ADCY4 | 0.045 | 0.622 | 0.62 | 1.07 (1 - 1.15) |
| cg11176058 | ADCY5 | 0.04 | 0.622 | 0.073 | 0.91 (0.82 - 1) |
| cg27182923 | ADCY5 | 8.86E-05 | 0.048 | 0.595 | 1.35 (1.16 - 1.56) |
| cg01959050 | ADCY9 | 0.037 | 0.62 | 0.371 | 0.97 (0.94 - 1) |
| cg00807235 | ADCY9 | 0.005 | 0.327 | 0.45 | 0.91 (0.84 - 0.97) |
| cg27392775 | ADIPOR1 | 0.026 | 0.584 | 0.251 | 1.13 (1.01 - 1.26) |
| cg20980321 | AGPAT1 | 0.001 | 0.2 | 0.28 | 0.83 (0.74 - 0.93) |
| cg15124201 | AGPAT1 | 0.003 | 0.241 | 0.324 | 0.85 (0.76 - 0.94) |
| cg15705209 | AGPAT5 | 0.022 | 0.571 | 0.34 | 1.09 (1.01 - 1.17) |
| cg09097916 | AHRR | 0.038 | 0.622 | 0.397 | 1.03 (1 - 1.06) |
| cg16294152 | AHRR | 0.023 | 0.571 | 0.522 | 1.06 (1.01 - 1.12) |
| cg05644480 | APOC1 | 0.015 | 0.51 | 0.552 | 0.91 (0.84 - 0.98) |
| cg25010880 | ARF3 | 0.018 | 0.532 | 0.066 | 1.05 (1.01 - 1.1) |
| cg01518465 | ARF3 | 0.011 | 0.458 | 0.084 | 1.06 (1.01 - 1.1) |
| cg11619602 | ARNTL | 0.017 | 0.529 | 0.344 | 1.04 (1.01 - 1.07) |
| cg11469321 | BDH2 | 0.005 | 0.324 | 0.107 | 1.2 (1.06 - 1.36) |
| cg05698090 | CERK | 0.01 | 0.457 | 0.48 | 0.93 (0.88 - 0.98) |
| cg02254551 | CETP | 0.012 | 0.458 | 0.998 | 0.96 (0.93 - 0.99) |
| cg04232615 | CETP | 0.013 | 0.476 | 0.983 | 0.94 (0.9 - 0.99) |
| cg07786355 | CH25H | 0.011 | 0.458 | 0.949 | 0.88 (0.8 - 0.97) |
| cg19984146 | CH25H | 0.048 | 0.629 | 0.877 | 1.09 (1 - 1.18) |
| cg18477191 | CPNE3 | 0.036 | 0.62 | 0.898 | 1.11 (1.01 - 1.23) |
| cg11245990 | CPT1A | 0.032 | 0.605 | 0.425 | 0.97 (0.95 - 1) |
| cg07511668 | CPT1A | 0.028 | 0.591 | 0.404 | 0.97 (0.94 - 1) |
| cg10879867 | CPT1A | 0.029 | 0.591 | 0.499 | 0.94 (0.89 - 0.99) |
| cg07716408 | CPT1A | 0.044 | 0.622 | 0.252 | 1.05 (1 - 1.1) |
| cg04772025 | CPT1A | 0.042 | 0.622 | 0.244 | 0.97 (0.94 - 1) |
| cg06028808 | CPT1A | 0.043 | 0.622 | 0.335 | 0.97 (0.94 - 1) |
| cg00449201 | CPT1C | 0.04 | 0.622 | 0.395 | 0.91 (0.83 - 1) |
| cg05418765 | CREB3L1 | 0.003 | 0.249 | 0.974 | 0.94 (0.9 - 0.98) |
| cg07008193 | CREB3L1 | 0.021 | 0.56 | 0.448 | 0.87 (0.77 - 0.98) |
| cg08550394 | CREBBP | 0.045 | 0.622 | 0.076 | 1.06 (1 - 1.12) |
| cg15508020 | CSNK2A2 | 0.032 | 0.604 | 0.987 | 0.87 (0.76 - 0.99) |
| cg11656478 | CYP1B1 | 0.02 | 0.556 | 0.104 | 0.91 (0.84 - 0.99) |
| cg12802310 | CYP1B1 | 0.013 | 0.489 | 0.143 | 1.09 (1.02 - 1.17) |
| cg08557799 | CYP21A2 | 0.018 | 0.532 | 0.813 | 1.19 (1.03 - 1.37) |
| cg22707705 | CYP27A1 | 0.039 | 0.622 | 0.491 | 1.13 (1.01 - 1.26) |
| cg26175971 | CYP27A1 | 0.033 | 0.605 | 0.294 | 1.09 (1.01 - 1.18) |
| cg26104932 | CYP27A1 | 0.032 | 0.604 | 0.124 | 1.08 (1.01 - 1.17) |
| cg24803063 | CYP4F11 | 0.034 | 0.618 | 0.977 | 1.1 (1.01 - 1.2) |
| cg00054210 | CYP7B1 | 0.017 | 0.532 | 0.375 | 1.16 (1.03 - 1.3) |
| cg01510388 | CYP7B1 | 0.018 | 0.532 | 0.538 | 1.17 (1.03 - 1.33) |
| cg13531735 | CYP8B1 | 0.009 | 0.435 | 0.458 | 1.16 (1.04 - 1.29) |
| cg27226927 | DCXR | 0.004 | 0.283 | 0.969 | 0.97 (0.95 - 0.99) |
| cg23299133 | DGKI | 0.013 | 0.494 | 0.249 | 0.96 (0.92 - 0.99) |
| cg13793093 | DGKI | 0.02 | 0.544 | 0.891 | 1.15 (1.02 - 1.3) |
| cg03664916 | DPEP1 | 0.046 | 0.622 | 0.177 | 1.05 (1 - 1.1) |
| cg09347176 | DPEP1 | 0.009 | 0.435 | 0.052 | 1.21 (1.05 - 1.39) |
| cg02485328 | EBF1 | 0.003 | 0.236 | 0.653 | 0.8 (0.69 - 0.92) |
| cg04217450 | EBF1 | 0.018 | 0.532 | 0.528 | 1.1 (1.02 - 1.2) |
| cg11647493 | ECI2 | 0.016 | 0.519 | 0.718 | 0.93 (0.88 - 0.99) |
| cg25866552 | EGFR | 0.012 | 0.458 | 0.404 | 0.86 (0.77 - 0.97) |
| cg12343106 | EGFR | 0.011 | 0.458 | 0.405 | 0.86 (0.76 - 0.97) |
| cg10908869 | ELOVL4 | 0.022 | 0.571 | 0.895 | 1.04 (1.01 - 1.07) |
| cg08356243 | ELOVL4 | 0.034 | 0.618 | 0.943 | 1.11 (1.01 - 1.21) |
| cg24859546 | ELOVL4 | 0.03 | 0.591 | 0.82 | 0.92 (0.85 - 0.99) |
| cg05482603 | ENO4 | 0.041 | 0.622 | 0.971 | 1.06 (1 - 1.12) |
| cg11615347 | ENPP7 | 0.045 | 0.622 | 0.28 | 1.13 (1 - 1.27) |
| cg06152945 | FAR2 | 0.014 | 0.497 | 0.19 | 0.85 (0.75 - 0.97) |
| cg19534438 | G0S2 | 0.04 | 0.622 | 0.337 | 0.94 (0.88 - 1) |
| cg27237541 | GAD2 | 0.003 | 0.242 | 0.587 | 0.82 (0.72 - 0.94) |
| cg16103990 | GAD2 | 0.001 | 0.2 | 0.639 | 0.89 (0.84 - 0.96) |
| cg15678844 | GAD2 | 0.024 | 0.571 | 0.245 | 0.9 (0.83 - 0.99) |
| cg24097797 | GAD2 | 0.003 | 0.242 | 0.409 | 0.81 (0.71 - 0.93) |
| cg14420108 | GALT | 0.01 | 0.457 | 0.921 | 1.09 (1.02 - 1.17) |
| cg17414007 | GCDH | 0.019 | 0.532 | 0.568 | 1.1 (1.02 - 1.19) |
| cg21050076 | GCDH | 0.018 | 0.532 | 0.419 | 0.92 (0.85 - 0.99) |
| cg02335376 | GDPD3 | 0.024 | 0.571 | 0.398 | 1.17 (1.02 - 1.35) |
| cg01252219 | GLTP | 0.002 | 0.233 | 0.826 | 1.05 (1.02 - 1.09) |
| cg12429852 | GM2A | 0.003 | 0.242 | 0.426 | 0.86 (0.78 - 0.95) |
| cg16550324 | GMDS | 0.046 | 0.622 | 0.452 | 0.89 (0.79 - 1) |
| cg21612339 | GMPPB | 0.006 | 0.35 | 0.568 | 1.03 (1.01 - 1.06) |
| cg15565533 | GMPPB | 0.012 | 0.458 | 0.71 | 0.87 (0.78 - 0.97) |
| cg05662500 | GPD1L | 0.003 | 0.242 | 0.251 | 0.86 (0.78 - 0.95) |
| cg27539234 | GPS2 | 0.037 | 0.62 | 0.293 | 1.14 (1.01 - 1.28) |
| cg07274523 | GPX1 | 0.026 | 0.584 | 0.267 | 1.04 (1 - 1.07) |
| cg24011261 | GPX1 | 0.026 | 0.584 | 0.565 | 1.12 (1.01 - 1.23) |
| cg26638444 | GPX3 | 0.043 | 0.622 | 0.524 | 0.9 (0.82 - 1) |
| cg23824666 | GPX5 | 0.02 | 0.544 | 0.557 | 1.1 (1.02 - 1.19) |
| cg02959725 | GYG1 | 0.011 | 0.458 | 0.715 | 1.13 (1.03 - 1.25) |
| cg02605996 | GYG1 | 0.01 | 0.457 | 0.78 | 1.11 (1.03 - 1.21) |
| cg26188543 | GYG1 | 0.011 | 0.458 | 0.67 | 1.13 (1.03 - 1.24) |
| cg26849931 | HDAC3 | 0.043 | 0.622 | 0.349 | 1.12 (1 - 1.25) |
| cg09273059 | HK1 | 0.044 | 0.622 | 0.589 | 0.96 (0.93 - 1) |
| cg24699895 | HK1 | 0.046 | 0.622 | 0.779 | 0.95 (0.9 - 1) |
| cg14709481 | HK3 | 0.031 | 0.604 | 0.384 | 0.94 (0.89 - 0.99) |
| cg03922381 | HKDC1 | 3.24E-04 | 0.105 | 0.166 | 0.78 (0.69 - 0.89) |
| cg23341612 | HKDC1 | 1.24E-04 | 0.06 | 0.331 | 0.84 (0.77 - 0.92) |
| cg11639651 | HKDC1 | 4.56E-04 | 0.13 | 0.102 | 0.76 (0.65 - 0.88) |
| cg05532178 | HKDC1 | 2.05E-04 | 0.083 | 0.479 | 0.81 (0.72 - 0.9) |
| cg11762346 | HKDC1 | 2.48E-04 | 0.086 | 0.088 | 0.78 (0.69 - 0.89) |
| cg24482350 | HMGCS2 | 0.005 | 0.304 | 0.582 | 1.13 (1.04 - 1.22) |
| cg04777726 | HSD17B14 | 0.037 | 0.62 | 0.453 | 1.03 (1 - 1.06) |
| cg16594139 | HSD17B14 | 0.024 | 0.571 | 0.304 | 1.03 (1 - 1.06) |
| cg26267310 | HSD17B14 | 0.024 | 0.571 | 0.407 | 1.03 (1 - 1.06) |
| cg19024700 | HSD17B14 | 0.024 | 0.571 | 0.298 | 1.03 (1 - 1.06) |
| cg11147442 | HSD17B6 | 0.045 | 0.622 | 0.466 | 0.88 (0.78 - 1) |
| cg14361474 | INPP4A | 0.023 | 0.571 | 0.732 | 0.94 (0.9 - 0.99) |
| cg14670266 | INPP4A | 0.022 | 0.571 | 0.705 | 0.96 (0.93 - 0.99) |
| cg18455616 | INPP4A | 0.022 | 0.571 | 0.557 | 1.05 (1.01 - 1.1) |
| cg06715410 | INPP5A | 0.003 | 0.242 | 0.492 | 1.03 (1.01 - 1.04) |
| cg18876826 | INPP5B | 0.004 | 0.254 | 0.06 | 1.12 (1.04 - 1.22) |
| cg13706613 | INPP5E | 0.028 | 0.591 | 0.942 | 0.83 (0.71 - 0.98) |
| cg02749887 | INS | 0.007 | 0.391 | 0.07 | 0.95 (0.91 - 0.99) |
| cg09864961 | INS | 0.037 | 0.62 | 0.417 | 0.9 (0.82 - 0.99) |
| cg02247068 | ITPKA | 0.033 | 0.605 | 0.608 | 0.89 (0.8 - 0.99) |
| cg03927133 | ITPKA | 0.022 | 0.57 | 0.824 | 0.93 (0.87 - 0.99) |
| cg21869046 | ITPKC | 0.028 | 0.591 | 0.507 | 0.97 (0.95 - 1) |
| cg09673807 | ITPR3 | 0.019 | 0.532 | 0.411 | 0.84 (0.73 - 0.97) |
| cg24862787 | KIT | 0.031 | 0.604 | 0.816 | 0.97 (0.95 - 1) |
| cg18056695 | KL | 2.05E-04 | 0.083 | 0.147 | 1.1 (1.04 - 1.15) |
| cg23943268 | KL | 2.30E-04 | 0.086 | 0.268 | 1.11 (1.05 - 1.17) |
| cg17806623 | KL | 0.036 | 0.62 | 0.4 | 0.9 (0.82 - 0.99) |
| cg11524300 | LBR | 0.002 | 0.236 | 0.067 | 0.93 (0.89 - 0.98) |
| cg22726611 | LBR | 0.001 | 0.199 | 0.084 | 0.94 (0.9 - 0.97) |
| cg17741809 | LIPA | 0.036 | 0.62 | 0.132 | 0.96 (0.93 - 1) |
| cg02956962 | LPA | 0.016 | 0.526 | 0.552 | 1.08 (1.02 - 1.16) |
| cg15614119 | LPIN1 | 0.003 | 0.242 | 0.629 | 1.13 (1.04 - 1.22) |
| cg15374751 | LPIN1 | 0.003 | 0.236 | 0.685 | 1.15 (1.05 - 1.26) |
| cg14443640 | LPIN2 | 0.042 | 0.622 | 0.145 | 1.05 (1 - 1.1) |
| cg15923936 | MAP3K7 | 0.012 | 0.458 | 0.156 | 1.07 (1.02 - 1.13) |
| cg17141626 | MAP3K7 | 0.015 | 0.514 | 0.793 | 0.9 (0.83 - 0.98) |
| cg21333589 | MAPK10 | 0.02 | 0.544 | 0.578 | 1.06 (1.01 - 1.11) |
| cg10336193 | MAPKAPK2 | 0.006 | 0.35 | 0.086 | 0.93 (0.88 - 0.98) |
| cg07730848 | MED10 | 0.041 | 0.622 | 0.84 | 0.96 (0.92 - 1) |
| cg10731507 | MRAS | 0.026 | 0.584 | 0.946 | 0.94 (0.9 - 0.99) |
| cg16260888 | MVK | 0.006 | 0.35 | 0.869 | 0.94 (0.9 - 0.98) |
| cg14256268 | NCOR2 | 0.021 | 0.556 | 0.883 | 1.06 (1.01 - 1.11) |
| cg21867733 | NCOR2 | 0.017 | 0.529 | 0.649 | 1.05 (1.01 - 1.09) |
| cg15627464 | NCOR2 | 0.023 | 0.571 | 0.507 | 1.07 (1.01 - 1.14) |
| cg27044649 | NCOR2 | 0.032 | 0.604 | 0.521 | 1.15 (1.01 - 1.3) |
| cg06204938 | NCOR2 | 0.046 | 0.622 | 0.806 | 1.03 (1 - 1.05) |
| cg20446824 | NCOR2 | 0.044 | 0.622 | 0.16 | 0.98 (0.95 - 1) |
| cg17322044 | NCOR2 | 0.04 | 0.622 | 0.087 | 0.98 (0.96 - 1) |
| cg08336425 | NCOR2 | 0.04 | 0.622 | 0.104 | 0.98 (0.96 - 1) |
| cg08330950 | NCOR2 | 0.04 | 0.622 | 0.069 | 0.98 (0.96 - 1) |
| cg00397479 | NEU1 | 0.016 | 0.519 | 0.448 | 0.85 (0.75 - 0.97) |
| cg25560247 | NEU1 | 0.022 | 0.571 | 0.064 | 1.1 (1.01 - 1.19) |
| cg25905215 | NFKB1 | 0.011 | 0.458 | 0.8 | 0.88 (0.8 - 0.97) |
| cg02689238 | NPAS2 | 0.045 | 0.622 | 0.228 | 1.05 (1 - 1.1) |
| cg18944984 | NR1H4 | 0.014 | 0.497 | 0.06 | 1.22 (1.04 - 1.42) |
| cg02283691 | NUDT19 | 0.047 | 0.625 | 0.817 | 0.93 (0.87 - 1) |
| cg22980127 | NUDT19 | 0.045 | 0.622 | 0.709 | 1.11 (1 - 1.22) |
| cg18693421 | NUDT19 | 0.039 | 0.622 | 0.556 | 1.06 (1 - 1.12) |
| cg15248132 | NUDT19 | 0.032 | 0.605 | 0.985 | 1.1 (1.01 - 1.19) |
| cg22928329 | NUDT19 | 0.045 | 0.622 | 0.582 | 1.05 (1 - 1.1) |
| cg13157960 | NUDT19 | 0.044 | 0.622 | 0.806 | 1.06 (1 - 1.12) |
| cg21498471 | NUDT19 | 0.028 | 0.591 | 0.926 | 0.95 (0.91 - 0.99) |
| cg25279613 | OSBPL3 | 0.018 | 0.532 | 0.075 | 0.93 (0.88 - 0.99) |
| cg12352225 | OSBPL3 | 0.003 | 0.242 | 0.501 | 0.98 (0.96 - 0.99) |
| cg25578967 | OSBPL3 | 0.004 | 0.275 | 0.169 | 1.08 (1.03 - 1.14) |
| cg21627775 | OSBPL6 | 0.041 | 0.622 | 0.364 | 0.97 (0.94 - 1) |
| cg22718891 | OSBPL9 | 0.02 | 0.544 | 0.889 | 0.87 (0.77 - 0.98) |
| cg02389942 | OXCT1 | 0.049 | 0.636 | 0.433 | 1.11 (1 - 1.23) |
| cg20405584 | OXCT1 | 0.048 | 0.629 | 0.374 | 1.1 (1 - 1.21) |
| cg23434998 | OXCT1 | 0.041 | 0.622 | 0.094 | 1.1 (1 - 1.21) |
| cg02441090 | OXCT1 | 0.039 | 0.622 | 0.175 | 1.09 (1 - 1.19) |
| cg06537708 | OXCT1 | 0.045 | 0.622 | 0.119 | 1.14 (1 - 1.29) |
| cg06197377 | PCSK9 | 0.026 | 0.584 | 0.515 | 1.08 (1.01 - 1.16) |
| cg05118916 | PCSK9 | 0.026 | 0.584 | 0.299 | 1.08 (1.01 - 1.16) |
| cg26666107 | PCSK9 | 0.048 | 0.629 | 0.491 | 1.1 (1 - 1.22) |
| cg14977608 | PCSK9 | 0.028 | 0.591 | 0.096 | 0.9 (0.83 - 0.99) |
| cg20245116 | PCSK9 | 0.023 | 0.571 | 0.357 | 1.03 (1 - 1.06) |
| cg13462158 | PCSK9 | 0.023 | 0.571 | 0.344 | 1.03 (1 - 1.06) |
| cg06908352 | PDGFC | 0.019 | 0.532 | 0.147 | 0.96 (0.94 - 0.99) |
| cg25158772 | PDHB | 0.016 | 0.519 | 0.265 | 0.98 (0.96 - 1) |
| cg09042787 | PEMT | 0.01 | 0.457 | 0.75 | 1.05 (1.01 - 1.1) |
| cg11556559 | PEMT | 0.048 | 0.629 | 0.387 | 1.07 (1 - 1.14) |
| cg05694563 | PEMT | 0.047 | 0.625 | 0.659 | 1.06 (1 - 1.12) |
| cg18173263 | PEMT | 0.004 | 0.304 | 0.709 | 1.07 (1.02 - 1.13) |
| cg02625024 | PEMT | 0.046 | 0.622 | 0.454 | 1.04 (1 - 1.09) |
| cg22542139 | PEMT | 0.014 | 0.497 | 0.798 | 1.09 (1.02 - 1.17) |
| cg18465945 | PEMT | 0.005 | 0.325 | 0.575 | 1.1 (1.03 - 1.17) |
| cg15823160 | PEX14 | 0.01 | 0.457 | 0.236 | 1.11 (1.03 - 1.21) |
| cg22715764 | PEX14 | 0.007 | 0.385 | 0.294 | 0.95 (0.91 - 0.98) |
| cg18147280 | PEX14 | 0.003 | 0.253 | 0.186 | 1.09 (1.03 - 1.15) |
| cg01780754 | PEX2 | 0.017 | 0.529 | 0.808 | 0.96 (0.92 - 0.99) |
| cg00451054 | PEX2 | 0.02 | 0.544 | 0.72 | 0.96 (0.94 - 0.99) |
| cg06463313 | PFKL | 0.043 | 0.622 | 0.422 | 0.95 (0.91 - 1) |
| cg06186332 | PHYH | 0.038 | 0.622 | 0.276 | 1.09 (1 - 1.19) |
| cg13435326 | PIK3CA | 0.03 | 0.593 | 0.369 | 1.11 (1.01 - 1.22) |
| cg10256708 | PIK3R2 | 0.01 | 0.457 | 0.074 | 1.18 (1.04 - 1.35) |
| cg24883498 | PIK3R2 | 0.01 | 0.457 | 0.516 | 1.13 (1.03 - 1.24) |
| cg12492496 | PIK3R2 | 0.048 | 0.629 | 0.898 | 1.12 (1 - 1.26) |
| cg10188048 | PIK3R2 | 0.047 | 0.625 | 0.897 | 1.12 (1 - 1.26) |
| cg05645812 | PIK3R2 | 0.046 | 0.622 | 0.731 | 1.12 (1 - 1.25) |
| cg00611469 | PISD | 0.022 | 0.571 | 0.17 | 0.96 (0.92 - 0.99) |
| cg25791279 | PISD | 0.024 | 0.571 | 0.474 | 1.05 (1.01 - 1.1) |
| cg10537193 | PISD | 0.011 | 0.458 | 0.346 | 0.93 (0.88 - 0.98) |
| cg05767143 | PITPNM3 | 0.024 | 0.571 | 0.46 | 0.89 (0.8 - 0.98) |
| cg23268290 | PITPNM3 | 0.042 | 0.622 | 0.464 | 0.9 (0.82 - 1) |
| cg04167480 | PITPNM3 | 0.037 | 0.62 | 0.449 | 0.92 (0.86 - 1) |
| cg21737020 | PITPNM3 | 0.017 | 0.532 | 0.197 | 0.92 (0.87 - 0.99) |
| cg26579892 | PLA2G16 | 0.039 | 0.622 | 0.411 | 0.97 (0.94 - 1) |
| cg14114326 | PLA2G16 | 0.039 | 0.622 | 0.379 | 0.94 (0.89 - 1) |
| cg14247180 | PLA2G6 | 0.019 | 0.544 | 0.85 | 1.04 (1.01 - 1.07) |
| cg14898416 | PLA2R1 | 0.009 | 0.438 | 0.067 | 0.9 (0.83 - 0.97) |
| cg00787282 | PLB1 | 0.012 | 0.467 | 0.201 | 0.91 (0.84 - 0.98) |
| cg25906705 | PLCB4 | 0.014 | 0.497 | 0.476 | 1.09 (1.02 - 1.17) |
| cg00471368 | PLCG2 | 0.046 | 0.622 | 0.396 | 0.95 (0.9 - 1) |
| cg06031301 | PLCG2 | 0.017 | 0.532 | 0.868 | 1.1 (1.02 - 1.19) |
| cg26783079 | PLCH2 | 0.043 | 0.622 | 0.133 | 1.14 (1 - 1.29) |
| cg19839825 | PNPLA6 | 0.015 | 0.514 | 0.112 | 1.05 (1.01 - 1.08) |
| cg09527270 | POMC | 6.83E-04 | 0.166 | 0.661 | 1.09 (1.04 - 1.15) |
| cg03560973 | POMC | 0.002 | 0.2 | 0.236 | 1.13 (1.05 - 1.23) |
| cg02079741 | POMC | 0.001 | 0.199 | 0.282 | 1.11 (1.04 - 1.19) |
| cg23598419 | POMC | 0.002 | 0.2 | 0.975 | 1.15 (1.05 - 1.25) |
| cg13025668 | POMC | 0.009 | 0.435 | 0.523 | 0.88 (0.8 - 0.97) |
| cg20387815 | POMC | 0.009 | 0.438 | 0.628 | 0.87 (0.79 - 0.97) |
| cg01926269 | POMC | 0.001 | 0.199 | 0.332 | 0.88 (0.81 - 0.95) |
| cg24425171 | POMC | 0.001 | 0.2 | 0.117 | 0.88 (0.82 - 0.95) |
| cg22900229 | POMC | 0.002 | 0.2 | 0.106 | 0.87 (0.8 - 0.95) |
| cg16302441 | POMC | 0.001 | 0.2 | 0.124 | 0.89 (0.83 - 0.96) |
| cg08030082 | POMC | 0.006 | 0.361 | 0.061 | 0.91 (0.85 - 0.97) |
| cg09916783 | POMC | 0.003 | 0.242 | 0.133 | 0.83 (0.74 - 0.94) |
| cg11503396 | POMC | 7.90E-04 | 0.175 | 0.181 | 0.93 (0.89 - 0.97) |
| cg04632671 | PPARG | 6.78E-05 | 0.041 | 0.998 | 1.23 (1.11 - 1.36) |
| cg02896941 | PPARGC1A | 0.028 | 0.591 | 0.108 | 0.9 (0.82 - 0.99) |
| cg16786458 | PPARGC1B | 0.012 | 0.458 | 0.213 | 1.05 (1.01 - 1.1) |
| cg09814231 | PPARGC1B | 0.011 | 0.458 | 0.309 | 1.07 (1.02 - 1.12) |
| cg08928958 | PPARGC1B | 0.039 | 0.622 | 0.202 | 1.08 (1 - 1.17) |
| cg09456493 | PPM1L | 0.048 | 0.629 | 0.061 | 1.06 (1 - 1.12) |
| cg14990266 | PPP2R2A | 0.04 | 0.622 | 0.917 | 0.88 (0.78 - 0.99) |
| cg02556634 | PPP2R2C | 0.031 | 0.604 | 0.813 | 1.06 (1.01 - 1.12) |
| cg17469361 | PPP2R2C | 0.035 | 0.62 | 0.681 | 1.09 (1.01 - 1.19) |
| cg04105091 | PPT2 | 0.037 | 0.62 | 0.465 | 1.1 (1.01 - 1.21) |
| cg12585943 | PPT2 | 0.035 | 0.62 | 0.468 | 1.09 (1.01 - 1.18) |
| cg13102294 | PPT2 | 0.036 | 0.62 | 0.477 | 1.1 (1.01 - 1.2) |
| cg00552704 | PPT2 | 0.035 | 0.62 | 0.394 | 1.09 (1.01 - 1.18) |
| cg06264679 | PPT2 | 0.036 | 0.62 | 0.53 | 1.09 (1.01 - 1.19) |
| cg00933538 | PPT2 | 0.032 | 0.604 | 0.492 | 1.05 (1 - 1.11) |
| cg23470939 | PPT2 | 0.032 | 0.605 | 0.623 | 1.06 (1 - 1.12) |
| cg11941520 | PPT2 | 0.034 | 0.618 | 0.562 | 1.08 (1.01 - 1.15) |
| cg08057899 | PPT2 | 0.023 | 0.571 | 0.214 | 0.88 (0.8 - 0.98) |
| cg20972917 | PRKAG2 | 0.034 | 0.618 | 0.157 | 0.86 (0.74 - 0.99) |
| cg17611936 | PRKAG2 | 0.037 | 0.62 | 0.453 | 0.98 (0.96 - 1) |
| cg12937183 | PRKAG2 | 0.029 | 0.591 | 0.671 | 1.12 (1.01 - 1.23) |
| cg26284782 | PRKAG2 | 0.035 | 0.62 | 0.813 | 0.89 (0.8 - 0.99) |
| cg04679323 | PRKCE | 0.038 | 0.622 | 0.262 | 1.33 (1.02 - 1.75) |
| cg14102644 | PSAT1 | 0.014 | 0.497 | 0.219 | 1.08 (1.02 - 1.14) |
| cg10015500 | PSPH | 0.016 | 0.514 | 0.676 | 0.86 (0.76 - 0.97) |
| cg03456771 | PSPH | 0.037 | 0.62 | 0.116 | 0.87 (0.77 - 0.99) |
| cg14561904 | PTGR1 | 0.014 | 0.497 | 0.114 | 1.11 (1.02 - 1.2) |
| cg26537568 | PXMP4 | 0.042 | 0.622 | 0.077 | 1.04 (1 - 1.08) |
| cg08601574 | PYGB | 0.047 | 0.625 | 0.986 | 0.97 (0.94 - 1) |
| cg20979703 | PYGB | 0.038 | 0.622 | 0.932 | 1.13 (1.01 - 1.28) |
| cg13008339 | PYGL | 0.04 | 0.622 | 0.26 | 1.03 (1 - 1.06) |
| cg22960284 | PYGL | 0.048 | 0.629 | 0.47 | 1.1 (1 - 1.2) |
| cg25123866 | PYGM | 0.045 | 0.622 | 0.965 | 1.07 (1 - 1.14) |
| cg10296062 | PYGM | 0.032 | 0.604 | 0.998 | 1.07 (1.01 - 1.13) |
| cg19626725 | RUFY1 | 0.029 | 0.591 | 0.399 | 0.97 (0.95 - 1) |
| cg00080972 | RUFY1 | 0.029 | 0.591 | 0.367 | 0.97 (0.95 - 1) |
| cg21226059 | RUFY1 | 0.029 | 0.591 | 0.355 | 0.97 (0.95 - 1) |
| cg14820908 | RUFY1 | 0.03 | 0.591 | 0.328 | 0.97 (0.95 - 1) |
| cg02136620 | RUFY1 | 0.03 | 0.591 | 0.251 | 0.97 (0.95 - 1) |
| cg09060608 | RUFY1 | 0.03 | 0.591 | 0.335 | 0.97 (0.95 - 1) |
| cg05457628 | RUFY1 | 0.03 | 0.591 | 0.32 | 0.97 (0.95 - 1) |
| cg22764044 | RUFY1 | 0.03 | 0.591 | 0.294 | 0.97 (0.95 - 1) |
| cg26516362 | RUFY1 | 0.03 | 0.591 | 0.328 | 0.97 (0.94 - 1) |
| cg12776061 | RXRB | 0.037 | 0.62 | 0.122 | 0.94 (0.89 - 1) |
| cg18020679 | RXRB | 0.045 | 0.622 | 0.135 | 0.95 (0.9 - 1) |
| cg14178541 | RXRG | 0.007 | 0.371 | 0.302 | 1.13 (1.04 - 1.24) |
| cg08729908 | SCARB1 | 0.031 | 0.604 | 0.885 | 1.06 (1.01 - 1.13) |
| cg18033235 | SIN3B | 0.02 | 0.552 | 0.179 | 0.88 (0.79 - 0.98) |
| cg21694044 | SLC25A17 | 0.035 | 0.62 | 0.546 | 0.91 (0.83 - 0.99) |
| cg13691744 | SLC44A4 | 0.005 | 0.304 | 0.428 | 0.88 (0.81 - 0.96) |
| cg26138846 | SLC44A4 | 0.008 | 0.431 | 0.732 | 0.84 (0.74 - 0.96) |
| cg07267067 | SOAT2 | 0.019 | 0.532 | 0.411 | 0.95 (0.91 - 0.99) |
| cg17818435 | SOAT2 | 0.026 | 0.584 | 0.508 | 0.89 (0.8 - 0.99) |
| cg04875514 | SOAT2 | 0.023 | 0.571 | 0.461 | 0.91 (0.83 - 0.99) |
| cg24603028 | SOAT2 | 0.019 | 0.532 | 0.637 | 0.95 (0.9 - 0.99) |
| cg21640526 | SOCS3 | 0.046 | 0.622 | 0.063 | 1.06 (1 - 1.12) |
| cg22640982 | SORBS1 | 0.002 | 0.233 | 0.078 | 0.92 (0.88 - 0.97) |
| cg03878208 | STARD10 | 3.42E-06 | 0.013 | 0.07 | 0.93 (0.9 - 0.96) |
| cg03575969 | STARD10 | 0.037 | 0.62 | 0.057 | 0.91 (0.84 - 0.99) |
| cg06270615 | STAT3 | 0.028 | 0.591 | 0.438 | 1.03 (1 - 1.06) |
| cg14116596 | TBXAS1 | 0.016 | 0.519 | 0.56 | 0.94 (0.89 - 0.99) |
| cg13869942 | THEM4 | 0.039 | 0.622 | 0.623 | 1.04 (1 - 1.07) |
| cg00931843 | TIAM2 | 0.028 | 0.591 | 0.259 | 0.92 (0.86 - 0.99) |
| cg11484872 | TNF | 0.007 | 0.385 | 0.082 | 1.18 (1.05 - 1.34) |
| cg10717214 | TNF | 0.047 | 0.625 | 0.636 | 1.13 (1 - 1.28) |
| cg11564829 | TNFRSF1A | 0.002 | 0.201 | 0.439 | 1.13 (1.05 - 1.23) |
| cg08418872 | TNFRSF1A | 0.01 | 0.457 | 0.061 | 0.87 (0.79 - 0.97) |
| cg04558553 | UGT2B7 | 0.014 | 0.497 | 0.977 | 1.11 (1.02 - 1.21) |
| cg09384937 | WNT10B | 0.015 | 0.512 | 0.168 | 1.08 (1.01 - 1.14) |
| cg13212803 | WNT10B | 0.002 | 0.236 | 0.102 | 1.25 (1.08 - 1.45) |
| cg07462861 | WNT10B | 0.006 | 0.35 | 0.094 | 1.07 (1.02 - 1.11) |

| Supplementary Table S1B. Summary of significant SMR associations for blood eQTLs with GDM risk in the FinnGen discovery cohort. | | | | | |
| --- | --- | --- | --- | --- | --- |
| **probeID** | **Gene Symbol** | **p SMR** | **p_FDR** | **p HEIDI** | **OR SMR (95% CI)** |
| ENSG00000230124 | ACBD6 | 0.014 | 0.482 | 0.936 | 1.09 (1.02 - 1.17) |
| ENSG00000112304 | ACOT13 | 0.034 | 0.578 | 0.271 | 1.14 (1.01 - 1.28) |
| ENSG00000119673 | ACOT2 | 0.02 | 0.532 | 0.64 | 1.13 (1.02 - 1.24) |
| ENSG00000177465 | ACOT4 | 0.022 | 0.539 | 0.975 | 1.05 (1.01 - 1.09) |
| ENSG00000123983 | ACSL3 | 0.027 | 0.554 | 0.246 | 0.86 (0.75 - 0.98) |
| ENSG00000197142 | ACSL5 | 0.048 | 0.599 | 0.209 | 1.04 (1 - 1.08) |
| ENSG00000138031 | ADCY3 | 0.047 | 0.597 | 0.106 | 0.82 (0.68 - 1) |
| ENSG00000006534 | ALDH3B1 | 0.02 | 0.532 | 0.821 | 1.19 (1.03 - 1.39) |
| ENSG00000143437 | ARNT | 0.021 | 0.533 | 0.097 | 1.15 (1.02 - 1.29) |
| ENSG00000172216 | CEBPB | 0.045 | 0.591 | 0.539 | 1.18 (1 - 1.39) |
| ENSG00000085719 | CPNE3 | 0.039 | 0.591 | 0.467 | 0.9 (0.82 - 1) |
| ENSG00000231852 | CYP21A2 | 0.011 | 0.454 | 0.338 | 1.11 (1.02 - 1.2) |
| ENSG00000135929 | CYP27A1 | 0.028 | 0.555 | 0.287 | 1.03 (1 - 1.05) |
| ENSG00000186115 | CYP4F2 | 0.044 | 0.591 | 0.347 | 0.75 (0.57 - 0.99) |
| ENSG00000169738 | DCXR | 0.013 | 0.477 | 0.995 | 1.04 (1.01 - 1.08) |
| ENSG00000064763 | FAR2 | 0.018 | 0.517 | 0.165 | 0.55 (0.34 - 0.9) |
| ENSG00000054983 | GALC | 0.038 | 0.585 | 0.425 | 0.93 (0.86 - 1) |
| ENSG00000213930 | GALT | 0.009 | 0.430 | 0.563 | 0.93 (0.88 - 0.98) |
| ENSG00000214013 | GANC | 0.038 | 0.585 | 0.423 | 0.71 (0.51 - 0.98) |
| ENSG00000105607 | GCDH | 0.026 | 0.554 | 0.07 | 0.95 (0.9 - 0.99) |
| ENSG00000170266 | GLB1 | 8.98E-04 | 0.168 | 0.262 | 0.81 (0.72 - 0.92) |
| ENSG00000139433 | GLTP | 0.002 | 0.233 | 0.712 | 0.89 (0.82 - 0.96) |
| ENSG00000119927 | GPAM | 0.042 | 0.591 | 0.349 | 0.79 (0.64 - 0.99) |
| ENSG00000233276 | GPX1 | 0.028 | 0.555 | 0.636 | 1.25 (1.02 - 1.53) |
| ENSG00000171720 | HDAC3 | 0.036 | 0.583 | 0.142 | 1.22 (1.01 - 1.46) |
| ENSG00000156515 | HK1 | 0.008 | 0.428 | 0.198 | 1.22 (1.05 - 1.42) |
| ENSG00000160883 | HK3 | 0.027 | 0.554 | 0.123 | 1.38 (1.04 - 1.84) |
| ENSG00000156510 | HKDC1 | 2.39E-05 | 0.017 | 0.106 | 0.88 (0.83 - 0.94) |
| ENSG00000087076 | HSD17B14 | 0.039 | 0.591 | 0.706 | 0.94 (0.88 - 1) |
| ENSG00000204228 | HSD17B8 | 0.041 | 0.591 | 0.141 | 1.08 (1 - 1.15) |
| ENSG00000086544 | ITPKC | 0.031 | 0.562 | 0.293 | 1.3 (1.02 - 1.64) |
| ENSG00000079435 | LIPE | 0.027 | 0.554 | 0.457 | 1.42 (1.04 - 1.93) |
| ENSG00000108590 | MED31 | 0.036 | 0.583 | 0.092 | 1.08 (1.01 - 1.16) |
| ENSG00000141026 | MED9 | 0.041 | 0.591 | 0.603 | 1.66 (1.02 - 2.71) |
| ENSG00000170191 | NANP | 0.043 | 0.591 | 0.868 | 0.94 (0.88 - 1) |
| ENSG00000095380 | NANS | 0.039 | 0.588 | 0.339 | 0.68 (0.47 - 0.98) |
| ENSG00000213965 | NUDT19 | 0.05 | 0.601 | 0.526 | 0.76 (0.57 - 1) |
| ENSG00000117859 | OSBPL9 | 0.017 | 0.509 | 0.611 | 0.71 (0.53 - 0.94) |
| ENSG00000079462 | PAFAH1B3 | 0.046 | 0.594 | 0.991 | 1.32 (1 - 1.73) |
| ENSG00000127980 | PEX1 | 0.038 | 0.585 | 0.451 | 1.16 (1.01 - 1.34) |
| ENSG00000165434 | PGM2L1 | 0.044 | 0.591 | 0.223 | 1.11 (1 - 1.22) |
| ENSG00000121879 | PIK3CA | 0.038 | 0.585 | 0.237 | 1.29 (1.01 - 1.65) |
| ENSG00000243708 | PLA2G4B | 0.046 | 0.594 | 0.517 | 1.06 (1 - 1.12) |
| ENSG00000184381 | PLA2G6 | 0.032 | 0.568 | 0.615 | 0.87 (0.76 - 0.99) |
| ENSG00000105559 | PLEKHA4 | 0.025 | 0.554 | 0.207 | 0.78 (0.62 - 0.97) |
| ENSG00000166819 | PLIN1 | 0.04 | 0.591 | 0.242 | 1.25 (1.01 - 1.55) |
| ENSG00000100417 | PMM1 | 0.035 | 0.578 | 0.512 | 0.92 (0.84 - 0.99) |
| ENSG00000213639 | PPP1CB | 0.021 | 0.533 | 0.426 | 0.95 (0.91 - 0.99) |
| ENSG00000186298 | PPP1CC | 0.048 | 0.599 | 0.186 | 1.23 (1 - 1.52) |
| ENSG00000115592 | PRKAG3 | 0.029 | 0.557 | 0.35 | 1.21 (1.02 - 1.44) |
| ENSG00000110536 | PTPMT1 | 0.004 | 0.306 | 0.337 | 0.7 (0.55 - 0.9) |
| ENSG00000100994 | PYGB | 0.045 | 0.591 | 0.965 | 0.97 (0.94 - 1) |
| ENSG00000168118 | RAB4A | 0.045 | 0.591 | 0.236 | 0.88 (0.78 - 1) |
| ENSG00000171174 | RBKS | 0.016 | 0.504 | 0.408 | 0.77 (0.62 - 0.95) |
| ENSG00000156671 | SAMD8 | 0.011 | 0.454 | 0.236 | 1.72 (1.13 - 2.62) |
| ENSG00000100596 | SPTLC2 | 0.016 | 0.507 | 0.793 | 0.93 (0.88 - 0.99) |
| ENSG00000214530 | STARD10 | 0.033 | 0.577 | 0.12 | 1.04 (1 - 1.08) |
| ENSG00000169884 | WNT10B | 0.012 | 0.471 | 0.108 | 0.78 (0.65 - 0.95) |

| Supplementary Table S1C. Summary of significant SMR associations for blood pQTLs with GDM risk in the FinnGen discovery cohort. | | | | | |
| --- | --- | --- | --- | --- | --- |
| **probeID** | **Protein** | **p SMR** | **p FDR** | **p HEIDI** | **OR SMR (95% CI)** |
| APOC1 | Apolipoprotein C1 | 0.002 | 0.333 | 0.674 | 0.88 (0.82 - 0.96) |
| CROT | Carnitine O-Octanoyltransferase | 0.039 | 0.756 | 0.711 | 1.05 (1 - 1.1) |
| DCXR | Dicarbonyl And L-Xylulose Reductase | 0.006 | 0.333 | 0.974 | 1.18 (1.05 - 1.33) |
| GCDH | Glutaryl-CoA Dehydrogenase | 0.029 | 0.688 | 0.14 | 0.85 (0.73 - 0.98) |
| MDH1 | Malate Dehydrogenase 1 | 0.02 | 0.522 | 0.746 | 1.55 (1.07 - 2.24) |
| MINPP1 | Multiple Inositol-Polyphosphate Phosphatase 1 | 0.004 | 0.333 | 0.281 | 0.76 (0.63 - 0.92) |

| Supplementary Table S2. Full SMR analysis results for blood mQTLs and GDM risk (FinnGen discovery cohort). | | | | | | | |  |  |
| --- | --- | --- | --- | --- | --- | --- | --- | --- | --- |
| **probeID** | **Located Gene** | **topSNP** | **p_SMR** | **p_FDR** | **p_HEIDI** | **OR SMR 95% CI** | **PP.H4.abf p12 = 5e-05** | **PP.H3.abf p12 = 1e-05** |  |
| cg26783079 | PLCH2 | rs1886730 | 0.04312608 | 0.605219287 | 0.132753 | 1.14 (1 - 1.29) | 0.132 | 0.126 |  |
| cg15823160 | PEX14 | rs1188528 | 0.00977642 | 0.440985363 | 0.2362217 | 1.11 (1.03 - 1.21) | 0.539 | 0.073 |  |
| cg22715764 | PEX14 | rs648324 | 0.006954043 | 0.389326529 | 0.2935165 | 0.95 (0.91 - 0.98) | 0.53 | 0.073 |  |
| cg18147280 | PEX14 | rs67488812 | 0.003435342 | 0.303477918 | 0.1864673 | 1.09 (1.03 - 1.15) | 0.712 | 0.059 |  |
| cg18876826 | INPP5B | rs72661807 | 0.003553093 | 0.304507159 | 0.0604984 | 1.12 (1.04 - 1.22) | 0.767 | 0.028 |  |
| cg22718891 | OSBPL9 | rs11205866 | 0.01973545 | 0.513287698 | 0.8894112 | 0.87 (0.77 - 0.98) | 0.568 | 0.079 |  |
| cg06197377 | PCSK9 | rs2479418 | 0.0258516 | 0.540995641 | 0.5147257 | 1.08 (1.01 - 1.16) | 0.222 | 0.123 |  |
| cg05118916 | PCSK9 | rs3001844 | 0.02567462 | 0.540440038 | 0.2990221 | 1.08 (1.01 - 1.16) | 0.202 | 0.124 |  |
| cg26666107 | PCSK9 | rs2009185 | 0.04844607 | 0.619757953 | 0.4910908 | 1.1 (1 - 1.22) | 0.174 | 0.125 |  |
| cg14977608 | PCSK9 | rs2479419 | 0.02807659 | 0.552009876 | 0.09596736 | 0.9 (0.83 - 0.99) | 0.231 | 0.123 |  |
| cg20245116 | PCSK9 | rs2479418 | 0.0227137 | 0.525097577 | 0.3565388 | 1.03 (1 - 1.06) | 0.245 | 0.123 |  |
| cg13462158 | PCSK9 | rs2479418 | 0.0226683 | 0.524657299 | 0.3436021 | 1.03 (1 - 1.06) | 0.245 | 0.123 |  |
| cg24482350 | HMGCS2 | rs1441009 | 0.004619379 | 0.329887133 | 0.5824014 | 1.13 (1.04 - 1.22) | 0.737 | 0.064 |  |
| cg09264377 | ACP6 | rs4950469 | 0.01846684 | 0.509208298 | 0.4364899 | 0.89 (0.81 - 0.98) | 0.409 | 0.057 |  |
| cg13869942 | THEM4 | rs9943225 | 0.03905931 | 0.594514212 | 0.6234087 | 1.04 (1 - 1.07) | 0.278 | 0.074 |  |
| cg14178541 | RXRG | rs185904 | 0.006562512 | 0.378272411 | 0.302274 | 1.13 (1.04 - 1.24) | 0.636 | 0.091 |  |
| cg26750139 | ACBD6 | rs12132837 | 0.02118943 | 0.51586272 | 0.9559663 | 1.15 (1.02 - 1.29) | 0.36 | 0.064 |  |
| cg27392775 | ADIPOR1 | rs12758184 | 0.02622078 | 0.541867478 | 0.2512393 | 1.13 (1.01 - 1.26) | 0.275 | 0.036 |  |
| cg10336193 | MAPKAPK2 | rs35125368 | 0.005931623 | 0.363653255 | 0.08559839 | 0.93 (0.88 - 0.98) | 0.58 | 0.103 |  |
| cg19534438 | G0S2 | rs3817870 | 0.03996211 | 0.59673349 | 0.3367893 | 0.94 (0.88 - 1) | 0.165 | 0.24 |  |
| cg11524300 | LBR | rs3856156 | 0.00236868 | 0.278262218 | 0.06679786 | 0.93 (0.89 - 0.98) | 0.707 | 0.253 |  |
| cg22726611 | LBR | rs7552953 | 0.001101208 | 0.214512402 | 0.08372139 | 0.94 (0.9 - 0.97) | 0.842 | 0.181 |  |
| cg15614119 | LPIN1 | rs13392363 | 0.003059714 | 0.291489169 | 0.6289118 | 1.13 (1.04 - 1.22) | 0.803 | 0.046 |  |
| cg15374751 | LPIN1 | rs6744682 | 0.002618486 | 0.280519166 | 0.684727 | 1.15 (1.05 - 1.26) | 0.805 | 0.046 |  |
| cg06293172 | ADCY3 | rs11691159 | 0.01515288 | 0.488821459 | 0.5869067 | 0.92 (0.85 - 0.98) | 0.071 | 0.904 |  |
| cg11023668 | ADCY3 | rs13410999 | 6.50727E-06 | 0.01323409 | 0.914793 | 0.96 (0.94 - 0.97) | 0.984 | 0.068 |  |
| cg26038461 | ADCY3 | rs2384057 | 1.90335E-05 | 0.030180097 | 0.6448185 | 0.89 (0.85 - 0.94) | 0.978 | 0.092 |  |
| cg04586622 | ADCY3 | rs10206196 | 8.19096E-06 | 0.015638374 | 0.9040251 | 1.06 (1.03 - 1.09) | 0.982 | 0.078 |  |
| cg20518994 | ADCY3 | rs6746013 | 4.24647E-05 | 0.04370955 | 0.8173811 | 1.09 (1.05 - 1.14) | 0.933 | 0.243 |  |
| cg26752663 | ADCY3 | rs10207642 | 0.000833534 | 0.183479377 | 0.3095643 | 0.81 (0.71 - 0.92) | 0.728 | 0.599 |  |
| cg16888658 | ADCY3 | rs10196998 | 0.000529995 | 0.15563777 | 0.2232322 | 0.94 (0.91 - 0.97) | 0.574 | 0.725 |  |
| cg15423357 | ADCY3 | rs10182458 | 4.24163E-05 | 0.04370955 | 0.3165145 | 1.06 (1.03 - 1.1) | 0.933 | 0.242 |  |
| cg01884057 | ADCY3 | rs6752378 | 2.82023E-05 | 0.034832549 | 0.46421 | 1.05 (1.03 - 1.07) | 0.936 | 0.234 |  |
| cg09527270 | POMC | rs76645364 | 0.00068343 | 0.173269003 | 0.6606836 | 1.09 (1.04 - 1.15) | 0.516 | 0.759 |  |
| cg03560973 | POMC | rs111675422 | 0.00152324 | 0.245270479 | 0.2360753 | 1.13 (1.05 - 1.23) | 0.522 | 0.756 |  |
| cg02079741 | POMC | rs7590512 | 0.001144807 | 0.216488759 | 0.2820158 | 1.11 (1.04 - 1.19) | 0.516 | 0.759 |  |
| cg23598419 | POMC | rs2384092 | 0.001599467 | 0.249187776 | 0.9748238 | 1.15 (1.05 - 1.25) | 0.525 | 0.754 |  |
| cg13025668 | POMC | rs2083116 | 0.008724562 | 0.424014088 | 0.522896 | 0.88 (0.8 - 0.97) | 0.135 | 0.893 |  |
| cg20387815 | POMC | rs2083116 | 0.009037711 | 0.429185756 | 0.6284781 | 0.87 (0.79 - 0.97) | 0.132 | 0.893 |  |
| cg01926269 | POMC | rs13402232 | 0.001183519 | 0.221441139 | 0.3320917 | 0.88 (0.81 - 0.95) | 0.516 | 0.759 |  |
| cg24425171 | POMC | rs874401 | 0.001274018 | 0.227852375 | 0.1168954 | 0.88 (0.82 - 0.95) | 0.51 | 0.762 |  |
| cg22900229 | POMC | rs4665775 | 0.00168511 | 0.249187776 | 0.1058768 | 0.87 (0.8 - 0.95) | 0.465 | 0.784 |  |
| cg16302441 | POMC | rs4665769 | 0.001387529 | 0.236011115 | 0.1236312 | 0.89 (0.83 - 0.96) | 0.485 | 0.775 |  |
| cg08030082 | POMC | rs2276597 | 0.006299812 | 0.372541095 | 0.06137312 | 0.91 (0.85 - 0.97) | 0.123 | 0.896 |  |
| cg09916783 | POMC | rs2164411 | 0.00311575 | 0.294036291 | 0.1334405 | 0.83 (0.74 - 0.94) | 0.44 | 0.796 |  |
| cg11503396 | POMC | rs2384092 | 0.000790128 | 0.18107623 | 0.1814759 | 0.93 (0.89 - 0.97) | 0.475 | 0.78 |  |
| cg00787282 | PLB1 | rs17741386 | 0.0121806 | 0.464632081 | 0.2008696 | 0.91 (0.84 - 0.98) | 0.157 | 0.78 |  |
| cg11656478 | CYP1B1 | rs4670813 | 0.02045108 | 0.51494927 | 0.1043223 | 0.91 (0.84 - 0.99) | 0.244 | 0.059 |  |
| cg12802310 | CYP1B1 | rs2447754 | 0.01297084 | 0.472397907 | 0.1428771 | 1.09 (1.02 - 1.17) | 0.462 | 0.054 |  |
| cg04679323 | PRKCE | rs138951145 | 0.03847611 | 0.592460924 | 0.2624478 | 1.33 (1.02 - 1.75) | 0.507 | 0.125 |  |
| cg14361474 | INPP4A | rs3769735 | 0.02308028 | 0.527433544 | 0.7324164 | 0.94 (0.9 - 0.99) | 0.308 | 0.057 |  |
| cg14670266 | INPP4A | rs3769729 | 0.02227856 | 0.522851759 | 0.7053096 | 0.96 (0.93 - 0.99) | 0.307 | 0.057 |  |
| cg18455616 | INPP4A | rs56141907 | 0.02215784 | 0.522317248 | 0.5566799 | 1.05 (1.01 - 1.1) | 0.307 | 0.058 |  |
| cg02689238 | NPAS2 | rs3754678 | 0.04459446 | 0.608936663 | 0.2276355 | 1.05 (1 - 1.1) | 0.165 | 0.059 |  |
| cg07688988 | ACOXL | rs72828845 | 0.03497813 | 0.580421796 | 0.857451 | 1.14 (1.01 - 1.3) | 0.468 | 0.124 |  |
| cg16206125 | ACOXL | rs72830996 | 0.04630116 | 0.613971101 | 0.8403935 | 1.14 (1 - 1.31) | 0.463 | 0.125 |  |
| cg14898416 | PLA2R1 | rs56172865 | 0.009094645 | 0.429601729 | 0.06734567 | 0.9 (0.83 - 0.97) | 0.604 | 0.133 |  |
| cg21627775 | OSBPL6 | rs11886090 | 0.04089214 | 0.598965553 | 0.3641131 | 0.97 (0.94 - 1) | 0.167 | 0.112 |  |
| cg22707705 | CYP27A1 | rs832808 | 0.0385038 | 0.592460924 | 0.4906973 | 1.13 (1.01 - 1.26) | 0.194 | 0.15 |  |
| cg26175971 | CYP27A1 | rs141941813 | 0.03256246 | 0.57221214 | 0.2938935 | 1.09 (1.01 - 1.18) | 0.202 | 0.149 |  |
| cg26104932 | CYP27A1 | rs7573075 | 0.03191482 | 0.569650958 | 0.124303 | 1.08 (1.01 - 1.17) | 0.206 | 0.149 |  |
| cg04632671 | PPARG | rs11709077 | 6.78393E-05 | 0.058224791 | 0.9983936 | 1.23 (1.11 - 1.36) | 0.991 | 0.044 |  |
| cg05662500 | GPD1L | rs6805518 | 0.003130451 | 0.294145992 | 0.2512905 | 0.86 (0.78 - 0.95) | 0.863 | 0.035 |  |
| cg13531735 | CYP8B1 | rs6774801 | 0.008718054 | 0.424014088 | 0.4583665 | 1.16 (1.04 - 1.29) | 0.647 | 0.09 |  |
| cg07274523 | GPX1 | rs34293138 | 0.02591843 | 0.541289664 | 0.2673219 | 1.04 (1 - 1.07) | 0.249 | 0.046 |  |
| cg24011261 | GPX1 | rs7648841 | 0.02587818 | 0.540995641 | 0.5648014 | 1.12 (1.01 - 1.23) | 0.248 | 0.046 |  |
| cg21612339 | GMPPB | rs6809431 | 0.005928752 | 0.363653255 | 0.568421 | 1.03 (1.01 - 1.06) | 0.512 | 0.09 |  |
| cg15565533 | GMPPB | rs13063621 | 0.01152432 | 0.459349878 | 0.7103969 | 0.87 (0.78 - 0.97) | 0.507 | 0.091 |  |
| cg25158772 | PDHB | rs9811074 | 0.01601738 | 0.495180595 | 0.2646793 | 0.98 (0.96 - 1) | 0.451 | 0.072 |  |
| cg22012981 | ACOX2 | rs13083957 | 0.02792971 | 0.551027593 | 0.6996711 | 1.15 (1.01 - 1.29) | 0.356 | 0.073 |  |
| cg11176058 | ADCY5 | rs62262402 | 0.03989181 | 0.596254771 | 0.0734275 | 0.91 (0.82 - 1) | 0.001 | 0.997 |  |
| cg27182923 | ADCY5 | rs10934647 | 8.85706E-05 | 0.067096732 | 0.5950529 | 1.35 (1.16 - 1.56) | 0.994 | 0.029 |  |
| cg10731507 | MRAS | rs4678411 | 0.02602654 | 0.541657347 | 0.9455098 | 0.94 (0.9 - 0.99) | 0.262 | 0.046 |  |
| cg02959725 | GYG1 | rs13323269 | 0.01137713 | 0.459349878 | 0.7146415 | 1.13 (1.03 - 1.25) | 0.496 | 0.062 |  |
| cg02605996 | GYG1 | rs13323269 | 0.01013978 | 0.446305612 | 0.7800851 | 1.11 (1.03 - 1.21) | 0.496 | 0.062 |  |
| cg26188543 | GYG1 | rs13323269 | 0.01109176 | 0.457268576 | 0.6703863 | 1.13 (1.03 - 1.24) | 0.493 | 0.062 |  |
| cg09456493 | PPM1L | rs11705811 | 0.04833765 | 0.619633301 | 0.06143893 | 1.06 (1 - 1.12) | 0.078 | 0.044 |  |
| cg13435326 | PIK3CA | rs34435186 | 0.02985177 | 0.558315231 | 0.3693618 | 1.11 (1.01 - 1.22) | 0.388 | 0.055 |  |
| cg02556634 | PPP2R2C | rs4604129 | 0.0307506 | 0.564517294 | 0.8130242 | 1.06 (1.01 - 1.12) | 0.213 | 0.116 |  |
| cg17469361 | PPP2R2C | rs6850064 | 0.03522871 | 0.580696597 | 0.6811813 | 1.09 (1.01 - 1.19) | 0.154 | 0.088 |  |
| cg02896941 | PPARGC1A | rs2970876 | 0.02797886 | 0.551048065 | 0.1082725 | 0.9 (0.82 - 0.99) | 0.056 | 0.153 |  |
| cg24862787 | KIT | rs13106834 | 0.03130576 | 0.566836505 | 0.8157512 | 0.97 (0.95 - 1) | 0.208 | 0.05 |  |
| cg04558553 | UGT2B7 | rs7438942 | 0.01430256 | 0.484588219 | 0.9770442 | 1.11 (1.02 - 1.21) | 0.384 | 0.051 |  |
| cg21333589 | MAPK10 | rs7661844 | 0.01980415 | 0.513287698 | 0.5780152 | 1.06 (1.01 - 1.11) | 0.291 | 0.065 |  |
| cg25905215 | NFKB1 | rs4496586 | 0.01075597 | 0.451956559 | 0.7999866 | 0.88 (0.8 - 0.97) | 0.007 | 0.987 |  |
| cg11469321 | BDH2 | rs6815062 | 0.005000017 | 0.338467142 | 0.1073875 | 1.2 (1.06 - 1.36) | 0.037 | 0.98 |  |
| cg06908352 | PDGFC | rs2204073 | 0.01854337 | 0.509541094 | 0.1470765 | 0.96 (0.94 - 0.99) | 0.312 | 0.059 |  |
| cg03977443 | ACSL1 | rs72707723 | 0.003499325 | 0.303693223 | 0.8701163 | 0.83 (0.74 - 0.94) | 0.811 | 0.122 |  |
| cg27112742 | ACSL1 | rs55830512 | 0.001147794 | 0.216488759 | 0.7474074 | 1.09 (1.04 - 1.15) | 0.874 | 0.095 |  |
| cg09097916 | AHRR | rs62335954 | 0.03847568 | 0.592460924 | 0.3967622 | 1.03 (1 - 1.06) | 0.022 | 0.024 |  |
| cg16294152 | AHRR | rs139267086 | 0.02326604 | 0.528245385 | 0.5217006 | 1.06 (1.01 - 1.12) | 0.403 | 0.037 |  |
| cg07730848 | MED10 | rs4702338 | 0.04072837 | 0.598630973 | 0.8397406 | 0.96 (0.92 - 1) | 0.176 | 0.064 |  |
| cg02389942 | OXCT1 | rs11750607 | 0.04923872 | 0.622736344 | 0.4333535 | 1.11 (1 - 1.23) | 0.182 | 0.112 |  |
| cg20405584 | OXCT1 | rs11740984 | 0.04801399 | 0.618600196 | 0.3743357 | 1.1 (1 - 1.21) | 0.188 | 0.112 |  |
| cg23434998 | OXCT1 | rs12186512 | 0.04082134 | 0.598858084 | 0.09439414 | 1.1 (1 - 1.21) | 0.205 | 0.111 |  |
| cg02441090 | OXCT1 | rs12186512 | 0.03940731 | 0.595205786 | 0.1753077 | 1.09 (1 - 1.19) | 0.205 | 0.111 |  |
| cg06537708 | OXCT1 | rs12186512 | 0.04534504 | 0.61230492 | 0.1188006 | 1.14 (1 - 1.29) | 0.152 | 0.113 |  |
| cg26849931 | HDAC3 | rs1421896 | 0.04260974 | 0.604523263 | 0.3486675 | 1.12 (1 - 1.25) | 0.17 | 0.081 |  |
| cg16786458 | PPARGC1B | rs62382268 | 0.01156669 | 0.459538066 | 0.2134038 | 1.05 (1.01 - 1.1) | 0.457 | 0.151 |  |
| cg09814231 | PPARGC1B | rs62382305 | 0.0108886 | 0.453741785 | 0.3089897 | 1.07 (1.02 - 1.12) | 0.504 | 0.14 |  |
| cg08928958 | PPARGC1B | rs4705382 | 0.03939573 | 0.595205786 | 0.201767 | 1.08 (1 - 1.17) | 0.188 | 0.161 |  |
| cg26638444 | GPX3 | rs2233302 | 0.04271968 | 0.604555637 | 0.5235938 | 0.9 (0.82 - 1) | 0.229 | 0.116 |  |
| cg12429852 | GM2A | rs13359408 | 0.002967682 | 0.289571408 | 0.426345 | 0.86 (0.78 - 0.95) | 0.782 | 0.074 |  |
| cg02485328 | EBF1 | rs12659540 | 0.002571654 | 0.280343216 | 0.6533547 | 0.8 (0.69 - 0.92) | 0.933 | 0.027 |  |
| cg04217450 | EBF1 | rs6895454 | 0.01848888 | 0.509208298 | 0.5283726 | 1.1 (1.02 - 1.2) | 0.465 | 0.093 |  |
| cg14709481 | HK3 | rs11739147 | 0.03104607 | 0.565833224 | 0.3838171 | 0.94 (0.89 - 0.99) | 0.238 | 0.06 |  |
| cg19626725 | RUFY1 | rs4701132 | 0.02947905 | 0.557119512 | 0.399096 | 0.97 (0.95 - 1) | 0.231 | 0.047 |  |
| cg00080972 | RUFY1 | rs4701132 | 0.02946874 | 0.557119512 | 0.367315 | 0.97 (0.95 - 1) | 0.231 | 0.047 |  |
| cg21226059 | RUFY1 | rs4701132 | 0.02948801 | 0.557119512 | 0.3547279 | 0.97 (0.95 - 1) | 0.231 | 0.047 |  |
| cg14820908 | RUFY1 | rs4701132 | 0.02950637 | 0.557119512 | 0.3276041 | 0.97 (0.95 - 1) | 0.231 | 0.047 |  |
| cg02136620 | RUFY1 | rs4701132 | 0.02957024 | 0.557283459 | 0.2513106 | 0.97 (0.95 - 1) | 0.231 | 0.047 |  |
| cg09060608 | RUFY1 | rs4701132 | 0.02950477 | 0.557119512 | 0.3347588 | 0.97 (0.95 - 1) | 0.231 | 0.047 |  |
| cg05457628 | RUFY1 | rs4701132 | 0.02953028 | 0.557119512 | 0.3198754 | 0.97 (0.95 - 1) | 0.232 | 0.047 |  |
| cg22764044 | RUFY1 | rs4701132 | 0.02961973 | 0.557317239 | 0.2944721 | 0.97 (0.95 - 1) | 0.231 | 0.047 |  |
| cg26516362 | RUFY1 | rs4701132 | 0.02964049 | 0.557317239 | 0.3278148 | 0.97 (0.94 - 1) | 0.231 | 0.047 |  |
| cg16550324 | GMDS | rs2479016 | 0.04579957 | 0.612995188 | 0.4517283 | 0.89 (0.79 - 1) | 0.229 | 0.078 |  |
| cg11647493 | ECI2 | rs3177253 | 0.01606501 | 0.495921282 | 0.7180475 | 0.93 (0.88 - 0.99) | 0.399 | 0.063 |  |
| cg08929083 | ACOT13 | rs74925745 | 0.03567354 | 0.581743705 | 0.3648154 | 0.92 (0.85 - 0.99) | 0.274 | 0.175 |  |
| cg23824666 | GPX5 | rs111262651 | 0.01975081 | 0.513287698 | 0.5573129 | 1.1 (1.02 - 1.19) | 0.097 | 0.083 |  |
| cg11484872 | TNF | rs2071592 | 0.006926643 | 0.389189974 | 0.08152618 | 1.18 (1.05 - 1.34) | 0.578 | 0.474 |  |
| cg10717214 | TNF | rs746868 | 0.04661168 | 0.615329799 | 0.6361982 | 1.13 (1 - 1.28) | 0.117 | 0.588 |  |
| cg00397479 | NEU1 | rs433061 | 0.01605191 | 0.495770315 | 0.4480163 | 0.85 (0.75 - 0.97) | 0.318 | 0.474 |  |
| cg25560247 | NEU1 | rs613165 | 0.02210109 | 0.522317248 | 0.06415275 | 1.1 (1.01 - 1.19) | 0.216 | 0.491 |  |
| cg13691744 | SLC44A4 | rs12661281 | 0.004506507 | 0.327832615 | 0.4280241 | 0.88 (0.81 - 0.96) | 0.607 | 0.396 |  |
| cg26138846 | SLC44A4 | rs12661281 | 0.008413298 | 0.418215119 | 0.7324317 | 0.84 (0.74 - 0.96) | 0.597 | 0.397 |  |
| cg08557799 | CYP21A2 | rs497309 | 0.01835949 | 0.509128339 | 0.813061 | 1.19 (1.03 - 1.37) | 0.367 | 0.411 |  |
| cg04105091 | PPT2 | rs6449 | 0.03665624 | 0.585832002 | 0.4651597 | 1.1 (1.01 - 1.21) | 0.005 | 0.979 |  |
| cg12585943 | PPT2 | rs6449 | 0.03477967 | 0.579776851 | 0.4678013 | 1.09 (1.01 - 1.18) | 0.005 | 0.979 |  |
| cg13102294 | PPT2 | rs6449 | 0.03608709 | 0.58348072 | 0.4765899 | 1.1 (1.01 - 1.2) | 0.005 | 0.979 |  |
| cg00552704 | PPT2 | rs6449 | 0.03486258 | 0.580301841 | 0.3941629 | 1.09 (1.01 - 1.18) | 0.005 | 0.979 |  |
| cg06264679 | PPT2 | rs6449 | 0.03560245 | 0.581238266 | 0.5304743 | 1.09 (1.01 - 1.19) | 0.006 | 0.979 |  |
| cg00933538 | PPT2 | rs6941112 | 0.03167327 | 0.568140454 | 0.4924316 | 1.05 (1 - 1.11) | 0.006 | 0.978 |  |
| cg23470939 | PPT2 | rs6941112 | 0.03230138 | 0.571831038 | 0.6230985 | 1.06 (1 - 1.12) | 0.006 | 0.978 |  |
| cg11941520 | PPT2 | rs6941112 | 0.03414291 | 0.577961446 | 0.5618115 | 1.08 (1.01 - 1.15) | 0.005 | 0.979 |  |
| cg08057899 | PPT2 | rs3891176 | 0.02275343 | 0.525590697 | 0.2143165 | 0.88 (0.8 - 0.98) | 0.001 | 0.979 |  |
| cg20980321 | AGPAT1 | rs3807039 | 0.001262757 | 0.227617424 | 0.2802421 | 0.83 (0.74 - 0.93) | 0.548 | 0.778 |  |
| cg15124201 | AGPAT1 | rs1009382 | 0.002725893 | 0.282671348 | 0.3238023 | 0.85 (0.76 - 0.94) | 0.304 | 0.903 |  |
| cg12776061 | RXRB | rs6531 | 0.03698397 | 0.586665508 | 0.122145 | 0.94 (0.89 - 1) | 1.08E-06 | 1 |  |
| cg18020679 | RXRB | rs9264486 | 0.04540319 | 0.61230492 | 0.1347658 | 0.95 (0.9 - 1) | 7.39E-04 | 0.998 |  |
| cg09673807 | ITPR3 | rs7768202 | 0.01869205 | 0.510138047 | 0.4110728 | 0.84 (0.73 - 0.97) | 0.467 | 0.075 |  |
| cg10908869 | ELOVL4 | rs1742475 | 0.02197969 | 0.521227873 | 0.8949575 | 1.04 (1.01 - 1.07) | 0.358 | 0.055 |  |
| cg08356243 | ELOVL4 | rs9443726 | 0.03386113 | 0.576751656 | 0.9434746 | 1.11 (1.01 - 1.21) | 0.343 | 0.055 |  |
| cg24859546 | ELOVL4 | rs239520 | 0.02955778 | 0.557170114 | 0.8196663 | 0.92 (0.85 - 0.99) | 0.345 | 0.055 |  |
| cg15923936 | MAP3K7 | rs182228 | 0.01180301 | 0.461623643 | 0.1561094 | 1.07 (1.02 - 1.13) | 0.451 | 0.046 |  |
| cg17141626 | MAP3K7 | rs381682 | 0.01544024 | 0.492038273 | 0.7933303 | 0.9 (0.83 - 0.98) | 0.437 | 0.046 |  |
| cg00931843 | TIAM2 | rs73004904 | 0.02839783 | 0.553451031 | 0.2585834 | 0.92 (0.86 - 0.99) | 0.281 | 0.083 |  |
| cg02956962 | LPA | rs79741405 | 0.01642802 | 0.499205622 | 0.5524472 | 1.08 (1.02 - 1.16) | 0.452 | 0.054 |  |
| cg25279613 | OSBPL3 | rs9639502 | 0.01837974 | 0.509208298 | 0.07454951 | 0.93 (0.88 - 0.99) | 0.483 | 0.407 |  |
| cg12352225 | OSBPL3 | rs11973976 | 0.002978145 | 0.2898169 | 0.5008065 | 0.98 (0.96 - 0.99) | 0.622 | 0.363 |  |
| cg25578967 | OSBPL3 | rs11973976 | 0.003906453 | 0.313117824 | 0.1688319 | 1.08 (1.03 - 1.14) | 0.618 | 0.364 |  |
| cg25866552 | EGFR | rs17584903 | 0.01183957 | 0.461623643 | 0.404242 | 0.86 (0.77 - 0.97) | 0.606 | 0.068 |  |
| cg12343106 | EGFR | rs56164988 | 0.0112058 | 0.458285467 | 0.4050318 | 0.86 (0.76 - 0.97) | 0.618 | 0.067 |  |
| cg10015500 | PSPH | rs1852696 | 0.01552772 | 0.492238754 | 0.6760123 | 0.86 (0.76 - 0.97) | 0.442 | 0.056 |  |
| cg03456771 | PSPH | rs1965522 | 0.03709328 | 0.586665508 | 0.1158329 | 0.87 (0.77 - 0.99) | 0.169 | 0.062 |  |
| cg23299133 | DGKI | rs6974718 | 0.01320599 | 0.474624194 | 0.2488219 | 0.96 (0.92 - 0.99) | 0.633 | 0.056 |  |
| cg13793093 | DGKI | rs6974718 | 0.01953587 | 0.513072717 | 0.8905125 | 1.15 (1.02 - 1.3) | 0.598 | 0.058 |  |
| cg14116596 | TBXAS1 | rs6952322 | 0.01610733 | 0.496130052 | 0.5597965 | 0.94 (0.89 - 0.99) | 0.343 | 0.056 |  |
| cg20972917 | PRKAG2 | rs112864625 | 0.03405406 | 0.577037751 | 0.1568626 | 0.86 (0.74 - 0.99) | 0.304 | 0.068 |  |
| cg17611936 | PRKAG2 | rs73484136 | 0.03732704 | 0.587571719 | 0.4530096 | 0.98 (0.96 - 1) | 0.209 | 0.07 |  |
| cg12937183 | PRKAG2 | rs117076300 | 0.02850311 | 0.553451031 | 0.6705199 | 1.12 (1.01 - 1.23) | 0.457 | 0.063 |  |
| cg26284782 | PRKAG2 | rs4726101 | 0.03526191 | 0.580696597 | 0.8126677 | 0.89 (0.8 - 0.99) | 0.217 | 0.068 |  |
| cg15705209 | AGPAT5 | rs117969529 | 0.02214721 | 0.522317248 | 0.3399216 | 1.09 (1.01 - 1.17) | 0.448 | 0.094 |  |
| cg14990266 | PPP2R2A | rs75368193 | 0.03972323 | 0.596032471 | 0.9166405 | 0.88 (0.78 - 0.99) | 0.326 | 0.086 |  |
| cg00054210 | CYP7B1 | rs10090584 | 0.01746758 | 0.504631157 | 0.3754318 | 1.16 (1.03 - 1.3) | 0.455 | 0.039 |  |
| cg01510388 | CYP7B1 | rs7834854 | 0.01809448 | 0.506336935 | 0.5384674 | 1.17 (1.03 - 1.33) | 0.458 | 0.039 |  |
| cg01780754 | PEX2 | rs9643429 | 0.01681149 | 0.501945621 | 0.8076328 | 0.96 (0.92 - 0.99) | 0.291 | 0.041 |  |
| cg00451054 | PEX2 | rs16939395 | 0.01966684 | 0.513072717 | 0.7196689 | 0.96 (0.94 - 0.99) | 0.289 | 0.041 |  |
| cg18477191 | CPNE3 | rs11781016 | 0.03626225 | 0.583796501 | 0.8983648 | 1.11 (1.01 - 1.23) | 0.236 | 0.047 |  |
| cg14420108 | GALT | rs11575579 | 0.01014711 | 0.446305612 | 0.9206135 | 1.09 (1.02 - 1.17) | 0.542 | 0.165 |  |
| cg14102644 | PSAT1 | rs3010745 | 0.01363447 | 0.479730364 | 0.2192354 | 1.08 (1.02 - 1.14) | 0.385 | 0.099 |  |
| cg14519518 | ABCA1 | rs76263865 | 0.02531056 | 0.537537687 | 0.1417705 | 1.04 (1.01 - 1.08) | 0.397 | 0.071 |  |
| cg14561904 | PTGR1 | rs2273788 | 0.01394321 | 0.482277679 | 0.1143046 | 1.11 (1.02 - 1.2) | 0.386 | 0.101 |  |
| cg13706613 | INPP5E | rs78420252 | 0.02845126 | 0.553451031 | 0.9421371 | 0.83 (0.71 - 0.98) | 0.119 | 0.174 |  |
| cg06186332 | PHYH | rs4606378 | 0.03799555 | 0.590533215 | 0.2760488 | 1.09 (1 - 1.19) | 0.175 | 0.086 |  |
| cg27237541 | GAD2 | rs3758446 | 0.002963417 | 0.289571408 | 0.5869138 | 0.82 (0.72 - 0.94) | 0.908 | 0.044 |  |
| cg16103990 | GAD2 | rs11819063 | 0.001485194 | 0.243549115 | 0.6391341 | 0.89 (0.84 - 0.96) | 0.909 | 0.044 |  |
| cg15678844 | GAD2 | rs989118 | 0.02366053 | 0.530639636 | 0.2448129 | 0.9 (0.83 - 0.99) | 0.804 | 0.072 |  |
| cg24097797 | GAD2 | rs8190647 | 0.002878947 | 0.286898307 | 0.4092286 | 0.81 (0.71 - 0.93) | 0.808 | 0.071 |  |
| cg03922381 | HKDC1 | rs5030938 | 0.000324146 | 0.124280918 | 0.1659051 | 0.78 (0.69 - 0.89) | 0.994 | 0.013 |  |
| cg23341612 | HKDC1 | rs10998648 | 0.000124323 | 0.082988254 | 0.3314545 | 0.84 (0.77 - 0.92) | 0.994 | 0.014 |  |
| cg11639651 | HKDC1 | rs9663238 | 0.000455752 | 0.14502221 | 0.1023778 | 0.76 (0.65 - 0.88) | 0.994 | 0.013 |  |
| cg05532178 | HKDC1 | rs9645500 | 0.000205208 | 0.102248455 | 0.4793231 | 0.81 (0.72 - 0.9) | 0.994 | 0.013 |  |
| cg11762346 | HKDC1 | rs9663238 | 0.000248044 | 0.110394537 | 0.08848451 | 0.78 (0.69 - 0.89) | 0.994 | 0.013 |  |
| cg09273059 | HK1 | rs2305199 | 0.04446068 | 0.608778669 | 0.5887575 | 0.96 (0.93 - 1) | 0.103 | 0.449 |  |
| cg24699895 | HK1 | rs2305199 | 0.04565656 | 0.612995188 | 0.7794825 | 0.95 (0.9 - 1) | 0.103 | 0.45 |  |
| cg07786355 | CH25H | rs11202999 | 0.0109539 | 0.455246225 | 0.9486323 | 0.88 (0.8 - 0.97) | 0.521 | 0.09 |  |
| cg19984146 | CH25H | rs4933497 | 0.04788117 | 0.618600196 | 0.8767001 | 1.09 (1 - 1.18) | 0.185 | 0.104 |  |
| cg17741809 | LIPA | rs2297475 | 0.03640134 | 0.584821941 | 0.1316226 | 0.96 (0.93 - 1) | 0.235 | 0.102 |  |
| cg22640982 | SORBS1 | rs34975945 | 0.00212868 | 0.270577795 | 0.07781197 | 0.92 (0.88 - 0.97) | 0.886 | 0.033 |  |
| cg05482603 | ENO4 | rs78873931 | 0.04112908 | 0.598965553 | 0.9708878 | 1.06 (1 - 1.12) | 0.287 | 0.043 |  |
| cg06715410 | INPP5A | rs76128717 | 0.002939581 | 0.289389158 | 0.4917463 | 1.03 (1.01 - 1.04) | 0.792 | 0.055 |  |
| cg02749887 | INS | rs3842753 | 0.007201725 | 0.397573647 | 0.07047455 | 0.95 (0.91 - 0.99) | 0.533 | 0.15 |  |
| cg09864961 | INS | rs3842727 | 0.03729733 | 0.587571719 | 0.4171969 | 0.9 (0.82 - 0.99) | 0.369 | 0.165 |  |
| cg11619602 | ARNTL | rs6486122 | 0.01670014 | 0.501712106 | 0.3437452 | 1.04 (1.01 - 1.07) | 0.325 | 0.056 |  |
| cg05418765 | CREB3L1 | rs75996226 | 0.003319723 | 0.300276973 | 0.9738164 | 0.94 (0.9 - 0.98) | 0.035 | 0.984 |  |
| cg07008193 | CREB3L1 | rs6485672 | 0.02094785 | 0.515577968 | 0.4478846 | 0.87 (0.77 - 0.98) | 0.009 | 0.989 |  |
| cg26579892 | PLA2G16 | rs7131579 | 0.03926615 | 0.595176096 | 0.411008 | 0.97 (0.94 - 1) | 0.184 | 0.078 |  |
| cg14114326 | PLA2G16 | rs3809073 | 0.03911388 | 0.594614779 | 0.3790493 | 0.94 (0.89 - 1) | 0.173 | 0.078 |  |
| cg25123866 | PYGM | rs674297 | 0.04512937 | 0.611237579 | 0.9651569 | 1.07 (1 - 1.14) | 0.301 | 0.032 |  |
| cg10296062 | PYGM | rs633923 | 0.03167539 | 0.568140454 | 0.9980682 | 1.07 (1.01 - 1.13) | 0.306 | 0.032 |  |
| cg11245990 | CPT1A | rs615644 | 0.03222723 | 0.571116087 | 0.4250282 | 0.97 (0.95 - 1) | 0.21 | 0.051 |  |
| cg07511668 | CPT1A | rs564849 | 0.02757733 | 0.548387288 | 0.4040825 | 0.97 (0.94 - 1) | 0.212 | 0.051 |  |
| cg10879867 | CPT1A | rs564849 | 0.02948289 | 0.557119512 | 0.498668 | 0.94 (0.89 - 0.99) | 0.221 | 0.05 |  |
| cg07716408 | CPT1A | rs10792002 | 0.04356302 | 0.606696482 | 0.2516414 | 1.05 (1 - 1.1) | 0.176 | 0.051 |  |
| cg04772025 | CPT1A | rs611046 | 0.04246363 | 0.603642327 | 0.2444455 | 0.97 (0.94 - 1) | 0.177 | 0.051 |  |
| cg06028808 | CPT1A | rs611046 | 0.04266074 | 0.604555637 | 0.334961 | 0.97 (0.94 - 1) | 0.178 | 0.051 |  |
| cg03878208 | STARD10 | rs77106637 | 3.41644E-06 | 0.009131862 | 0.07003869 | 0.93 (0.9 - 0.96) | 0.998 | 0.007 |  |
| cg03575969 | STARD10 | rs12795307 | 0.0366665 | 0.585832002 | 0.05678417 | 0.91 (0.84 - 0.99) | 0.055 | 0.798 |  |
| cg11564829 | TNFRSF1A | rs12828469 | 0.00177805 | 0.253567277 | 0.4394836 | 1.13 (1.05 - 1.23) | 0.84 | 0.058 |  |
| cg08418872 | TNFRSF1A | rs4149576 | 0.01019969 | 0.446305612 | 0.06093753 | 0.87 (0.79 - 0.97) | 0.418 | 0.105 |  |
| cg06152945 | FAR2 | rs12578244 | 0.01419352 | 0.483849653 | 0.1901877 | 0.85 (0.75 - 0.97) | 0.531 | 0.104 |  |
| cg25010880 | ARF3 | rs833826 | 0.01771835 | 0.505051586 | 0.0661121 | 1.05 (1.01 - 1.1) | 0.388 | 0.146 |  |
| cg01518465 | ARF3 | rs7297958 | 0.01075435 | 0.451956559 | 0.08430639 | 1.06 (1.01 - 1.1) | 0.381 | 0.146 |  |
| cg09384937 | WNT10B | rs2070940 | 0.01494956 | 0.488495018 | 0.1683009 | 1.08 (1.01 - 1.14) | 0.445 | 0.14 |  |
| cg13212803 | WNT10B | rs833478 | 0.002396636 | 0.278381402 | 0.1021076 | 1.25 (1.08 - 1.45) | 0.894 | 0.059 |  |
| cg07462861 | WNT10B | rs833827 | 0.006043932 | 0.366331588 | 0.09352682 | 1.07 (1.02 - 1.11) | 0.422 | 0.138 |  |
| cg07267067 | SOAT2 | rs2280698 | 0.0185953 | 0.509541094 | 0.4114207 | 0.95 (0.91 - 0.99) | 0.058 | 0.085 |  |
| cg17818435 | SOAT2 | rs2280698 | 0.02631947 | 0.542300596 | 0.5079338 | 0.89 (0.8 - 0.99) | 0.452 | 0.073 |  |
| cg04875514 | SOAT2 | rs2280698 | 0.02319242 | 0.527778467 | 0.4607974 | 0.91 (0.83 - 0.99) | 0.393 | 0.076 |  |
| cg24603028 | SOAT2 | rs2280698 | 0.01866822 | 0.510006444 | 0.6371699 | 0.95 (0.9 - 0.99) | 0.456 | 0.073 |  |
| cg11147442 | HSD17B6 | rs10783799 | 0.04476666 | 0.60906161 | 0.4660461 | 0.88 (0.78 - 1) | 0.516 | 0.043 |  |
| cg18944984 | NR1H4 | rs12297839 | 0.01379444 | 0.481578439 | 0.06000018 | 1.22 (1.04 - 1.42) | 0.554 | 0.079 |  |
| cg16260888 | MVK | rs77902418 | 0.005964703 | 0.364236224 | 0.8687618 | 0.94 (0.9 - 0.98) | 0.582 | 0.066 |  |
| cg01252219 | GLTP | rs7966820 | 0.002154143 | 0.27066539 | 0.8259482 | 1.05 (1.02 - 1.09) | 0.745 | 0.078 |  |
| cg23907586 | ACADS | rs2066938 | 0.0482219 | 0.619135196 | 0.4600854 | 1.03 (1 - 1.06) | 0.167 | 0.102 |  |
| cg06196801 | ACADS | rs12829722 | 0.0497886 | 0.622840873 | 0.5155867 | 1.04 (1 - 1.09) | 0.175 | 0.102 |  |
| cg09813248 | ACADS | rs7308648 | 0.03068665 | 0.564229065 | 0.153325 | 1.05 (1 - 1.11) | 0.156 | 0.103 |  |
| cg06793505 | ACADS | rs2066938 | 0.04909139 | 0.621881885 | 0.5533795 | 1.04 (1 - 1.09) | 0.176 | 0.102 |  |
| cg06366792 | ACADS | rs12825376 | 0.027195 | 0.546743129 | 0.7703742 | 1.07 (1.01 - 1.14) | 0.331 | 0.097 |  |
| cg14256268 | NCOR2 | rs941181 | 0.0205536 | 0.515377492 | 0.8831354 | 1.06 (1.01 - 1.11) | 0.299 | 0.098 |  |
| cg21867733 | NCOR2 | rs837935 | 0.01685272 | 0.501945621 | 0.648601 | 1.05 (1.01 - 1.09) | 0.322 | 0.097 |  |
| cg15627464 | NCOR2 | rs4765152 | 0.02283082 | 0.526076077 | 0.5069335 | 1.07 (1.01 - 1.14) | 0.306 | 0.098 |  |
| cg27044649 | NCOR2 | rs1242991 | 0.03169118 | 0.568140454 | 0.5208201 | 1.15 (1.01 - 1.3) | 0.297 | 0.098 |  |
| cg06204938 | NCOR2 | rs12822442 | 0.04596016 | 0.612995188 | 0.8059724 | 1.03 (1 - 1.05) | 0.182 | 0.101 |  |
| cg20446824 | NCOR2 | rs837500 | 0.04375265 | 0.607382091 | 0.1600838 | 0.98 (0.95 - 1) | 0.162 | 0.088 |  |
| cg17322044 | NCOR2 | rs10846696 | 0.04039521 | 0.597977814 | 0.0868358 | 0.98 (0.96 - 1) | 0.168 | 0.074 |  |
| cg08336425 | NCOR2 | rs10846696 | 0.04038874 | 0.597977814 | 0.1043328 | 0.98 (0.96 - 1) | 0.167 | 0.074 |  |
| cg08330950 | NCOR2 | rs10846696 | 0.04032381 | 0.597977814 | 0.06932361 | 0.98 (0.96 - 1) | 0.167 | 0.074 |  |
| cg08729908 | SCARB1 | rs10773119 | 0.03080652 | 0.565095695 | 0.8850837 | 1.06 (1.01 - 1.13) | 0.205 | 0.066 |  |
| cg20959480 | AACS | rs58624919 | 0.02643284 | 0.542729619 | 0.7870093 | 1.05 (1.01 - 1.09) | 0.227 | 0.056 |  |
| cg13348062 | AACS | rs10846829 | 0.04154276 | 0.600310208 | 0.770528 | 1.08 (1 - 1.17) | 0.195 | 0.057 |  |
| cg06287003 | AACS | rs41473449 | 0.0179966 | 0.506336935 | 0.9441805 | 0.97 (0.94 - 0.99) | 0.304 | 0.054 |  |
| cg06987292 | AACS | rs35620656 | 0.02579564 | 0.540970775 | 0.9295994 | 0.91 (0.85 - 0.99) | 0.295 | 0.054 |  |
| cg02766259 | AACS | rs35620656 | 0.02375438 | 0.531008305 | 0.9620566 | 0.94 (0.88 - 0.99) | 0.289 | 0.054 |  |
| cg18056695 | KL | rs4941698 | 0.000205476 | 0.102248455 | 0.1468099 | 1.1 (1.04 - 1.15) | 0.98 | 0.03 |  |
| cg23943268 | KL | rs4941698 | 0.000229986 | 0.10761324 | 0.2678044 | 1.11 (1.05 - 1.17) | 0.98 | 0.031 |  |
| cg17806623 | KL | rs417255 | 0.03585413 | 0.582431945 | 0.3996794 | 0.9 (0.82 - 0.99) | 0.19 | 0.325 |  |
| cg02098786 | ADCY4 | rs12436417 | 0.04169575 | 0.600665353 | 0.5313143 | 1.03 (1 - 1.06) | 0.187 | 0.045 |  |
| cg26279745 | ADCY4 | rs12436417 | 0.04162043 | 0.600424959 | 0.4475899 | 1.03 (1 - 1.06) | 0.187 | 0.045 |  |
| cg05185634 | ADCY4 | rs12436417 | 0.045388 | 0.61230492 | 0.6201056 | 1.07 (1 - 1.15) | 0.182 | 0.045 |  |
| cg13008339 | PYGL | rs2356729 | 0.04049238 | 0.598270193 | 0.2601182 | 1.03 (1 - 1.06) | 0.175 | 0.082 |  |
| cg22960284 | PYGL | rs2356729 | 0.04774277 | 0.618362401 | 0.4696364 | 1.1 (1 - 1.2) | 0.17 | 0.082 |  |
| cg21233517 | ACOT4 | rs3742819 | 0.03098454 | 0.565833224 | 0.8073694 | 0.92 (0.86 - 0.99) | 0.244 | 0.045 |  |
| cg10733249 | ACOT4 | rs10137126 | 0.02459711 | 0.533878566 | 0.647775 | 0.87 (0.77 - 0.98) | 0.151 | 0.046 |  |
| cg13197457 | ACOT4 | rs11159029 | 0.02702528 | 0.545951795 | 0.9694859 | 0.95 (0.91 - 0.99) | 0.245 | 0.045 |  |
| cg01675153 | ACOT6 | rs3742819 | 0.03252968 | 0.572209867 | 0.7239678 | 0.91 (0.83 - 0.99) | 0.239 | 0.045 |  |
| cg02247068 | ITPKA | rs113423265 | 0.03271544 | 0.572426635 | 0.6084283 | 0.89 (0.8 - 0.99) | 0.387 | 0.084 |  |
| cg03927133 | ITPKA | rs1757457 | 0.02153658 | 0.517829126 | 0.8244792 | 0.93 (0.87 - 0.99) | 0.326 | 0.086 |  |
| cg08550394 | CREBBP | rs2531997 | 0.04515417 | 0.611237579 | 0.07575528 | 1.06 (1 - 1.12) | 0.16 | 0.099 |  |
| cg01959050 | ADCY9 | rs10852641 | 0.03652711 | 0.58563568 | 0.3714722 | 0.97 (0.94 - 1) | 0.18 | 0.075 |  |
| cg00807235 | ADCY9 | rs2526293 | 0.005240608 | 0.345991079 | 0.4497189 | 0.91 (0.84 - 0.97) | 0.658 | 0.057 |  |
| cg01332683 | ABCC1 | rs5016527 | 0.03712352 | 0.586665508 | 0.9879087 | 0.9 (0.82 - 0.99) | 0.15 | 0.047 |  |
| cg02335376 | GDPD3 | rs34876189 | 0.02427255 | 0.53212588 | 0.3977525 | 1.17 (1.02 - 1.35) | 0.577 | 0.008 |  |
| cg02254551 | CETP | rs820299 | 0.01185279 | 0.461623643 | 0.9981128 | 0.96 (0.93 - 0.99) | 0.364 | 0.154 |  |
| cg04232615 | CETP | rs820299 | 0.0125196 | 0.466441107 | 0.982655 | 0.94 (0.9 - 0.99) | 0.364 | 0.154 |  |
| cg15508020 | CSNK2A2 | rs77474474 | 0.03187498 | 0.569403882 | 0.9868159 | 0.87 (0.76 - 0.99) | 0.381 | 0.054 |  |
| cg00471368 | PLCG2 | rs4591139 | 0.04602993 | 0.612995188 | 0.3964587 | 0.95 (0.9 - 1) | 0.131 | 0.274 |  |
| cg06031301 | PLCG2 | rs4580154 | 0.01734075 | 0.504069489 | 0.8680836 | 1.1 (1.02 - 1.19) | 0.315 | 0.258 |  |
| cg10265258 | ACSF3 | rs36075163 | 0.04608517 | 0.613061034 | 0.110644 | 1.03 (1 - 1.05) | 0.159 | 0.06 |  |
| cg07944420 | ACSF3 | rs36075163 | 0.04602637 | 0.612995188 | 0.1467993 | 1.02 (1 - 1.05) | 0.159 | 0.06 |  |
| cg03664916 | DPEP1 | rs62068701 | 0.04618305 | 0.613448345 | 0.1772324 | 1.05 (1 - 1.1) | 0.185 | 0.073 |  |
| cg09347176 | DPEP1 | rs2052868 | 0.008762986 | 0.424014088 | 0.05209459 | 1.21 (1.05 - 1.39) | 0.816 | 0.039 |  |
| cg05767143 | PITPNM3 | rs72830350 | 0.02438396 | 0.533117845 | 0.4599427 | 0.89 (0.8 - 0.98) | 0.282 | 0.08 |  |
| cg23268290 | PITPNM3 | rs11868516 | 0.04209362 | 0.601947774 | 0.4638621 | 0.9 (0.82 - 1) | 0.253 | 0.081 |  |
| cg04167480 | PITPNM3 | rs56038394 | 0.0371303 | 0.586665508 | 0.4492353 | 0.92 (0.86 - 1) | 0.266 | 0.08 |  |
| cg21737020 | PITPNM3 | rs16955991 | 0.01748649 | 0.504674084 | 0.1967589 | 0.92 (0.87 - 0.99) | 0.273 | 0.08 |  |
| cg27539234 | GPS2 | rs3809817 | 0.03710989 | 0.586665508 | 0.2926479 | 1.14 (1.01 - 1.28) | 0.245 | 0.056 |  |
| cg09042787 | PEMT | rs729975 | 0.009836397 | 0.442340264 | 0.7502408 | 1.05 (1.01 - 1.1) | 0.409 | 0.113 |  |
| cg11556559 | PEMT | rs1531098 | 0.04787075 | 0.618600196 | 0.3874478 | 1.07 (1 - 1.14) | 0.167 | 0.124 |  |
| cg05694563 | PEMT | rs1531098 | 0.04708378 | 0.617166698 | 0.658702 | 1.06 (1 - 1.12) | 0.433 | 0.111 |  |
| cg18173263 | PEMT | rs4924922 | 0.004498937 | 0.327832615 | 0.7094766 | 1.07 (1.02 - 1.13) | 0.61 | 0.098 |  |
| cg02625024 | PEMT | rs1531098 | 0.04571619 | 0.612995188 | 0.4535056 | 1.04 (1 - 1.09) | 0.167 | 0.124 |  |
| cg22542139 | PEMT | rs4244594 | 0.0137238 | 0.481217743 | 0.7984756 | 1.09 (1.02 - 1.17) | 0.443 | 0.111 |  |
| cg18465945 | PEMT | rs4924922 | 0.00515055 | 0.343928803 | 0.5746764 | 1.1 (1.03 - 1.17) | 0.377 | 0.115 |  |
| cg06270615 | STAT3 | rs6503697 | 0.02752102 | 0.548314243 | 0.438024 | 1.03 (1 - 1.06) | 0.249 | 0.048 |  |
| cg21640526 | SOCS3 | rs62079134 | 0.04586135 | 0.612995188 | 0.06252177 | 1.06 (1 - 1.12) | 0.222 | 0.106 |  |
| cg11615347 | ENPP7 | rs34231971 | 0.04483732 | 0.609428436 | 0.2802955 | 1.13 (1 - 1.27) | 0.182 | 0.082 |  |
| cg27226927 | DCXR | rs28755469 | 0.004064777 | 0.3153181 | 0.9694369 | 0.97 (0.95 - 0.99) | 0.693 | 0.029 |  |
| cg14443640 | LPIN2 | rs139130192 | 0.04206489 | 0.601743455 | 0.1451677 | 1.05 (1 - 1.1) | 0.357 | 0.049 |  |
| cg18660278 | ACSBG2 | rs55908734 | 0.04623583 | 0.613626666 | 0.2242655 | 0.9 (0.82 - 1) | 0.2 | 0.117 |  |
| cg19839825 | PNPLA6 | rs586551 | 0.01532154 | 0.491216288 | 0.1116164 | 1.05 (1.01 - 1.08) | 0.352 | 0.035 |  |
| cg17414007 | GCDH | rs2242517 | 0.01854418 | 0.509541094 | 0.5678691 | 1.1 (1.02 - 1.19) | 0.404 | 0.105 |  |
| cg21050076 | GCDH | rs2242517 | 0.01772775 | 0.505051586 | 0.4187684 | 0.92 (0.85 - 0.99) | 0.35 | 0.107 |  |
| cg24803063 | CYP4F11 | rs11879253 | 0.03401331 | 0.576941256 | 0.9774912 | 1.1 (1.01 - 1.2) | 0.233 | 0.092 |  |
| cg18033235 | SIN3B | rs2227381 | 0.02019438 | 0.51363782 | 0.1791986 | 0.88 (0.79 - 0.98) | 0.42 | 0.126 |  |
| cg10256708 | PIK3R2 | rs1566029 | 0.01002384 | 0.444853074 | 0.07379239 | 1.18 (1.04 - 1.35) | 0.544 | 0.065 |  |
| cg24883498 | PIK3R2 | rs10409167 | 0.01035359 | 0.448572312 | 0.5156822 | 1.13 (1.03 - 1.24) | 0.565 | 0.064 |  |
| cg12492496 | PIK3R2 | rs8113227 | 0.04812481 | 0.618600196 | 0.8980664 | 1.12 (1 - 1.26) | 0.345 | 0.072 |  |
| cg10188048 | PIK3R2 | rs2006885 | 0.04696486 | 0.617086599 | 0.8973881 | 1.12 (1 - 1.26) | 0.343 | 0.072 |  |
| cg05645812 | PIK3R2 | rs4808754 | 0.04596202 | 0.612995188 | 0.7310753 | 1.12 (1 - 1.25) | 0.348 | 0.072 |  |
| cg02283691 | NUDT19 | rs8108621 | 0.04675125 | 0.616010273 | 0.8172221 | 0.93 (0.87 - 1) | 0.198 | 0.129 |  |
| cg22980127 | NUDT19 | rs10413282 | 0.04462591 | 0.608936663 | 0.7092772 | 1.11 (1 - 1.22) | 0.204 | 0.129 |  |
| cg18693421 | NUDT19 | rs10413279 | 0.03861715 | 0.59261824 | 0.555869 | 1.06 (1 - 1.12) | 0.208 | 0.129 |  |
| cg15248132 | NUDT19 | rs71351189 | 0.03218225 | 0.571112272 | 0.9847268 | 1.1 (1.01 - 1.19) | 0.222 | 0.128 |  |
| cg22928329 | NUDT19 | rs34748593 | 0.04543375 | 0.612457984 | 0.5819439 | 1.05 (1 - 1.1) | 0.193 | 0.129 |  |
| cg13157960 | NUDT19 | rs7246451 | 0.04415138 | 0.608381262 | 0.8062587 | 1.06 (1 - 1.12) | 0.195 | 0.129 |  |
| cg21498471 | NUDT19 | rs71351189 | 0.02820562 | 0.552841608 | 0.9260262 | 0.95 (0.91 - 0.99) | 0.224 | 0.128 |  |
| cg21869046 | ITPKC | rs28493229 | 0.02789579 | 0.551027593 | 0.5072798 | 0.97 (0.95 - 1) | 0.274 | 0.084 |  |
| cg05644480 | APOC1 | rs59325138 | 0.01478907 | 0.488495018 | 0.5517886 | 0.91 (0.84 - 0.98) | 0.393 | 0.058 |  |
| cg04777726 | HSD17B14 | rs17272645 | 0.03689723 | 0.586604412 | 0.4528339 | 1.03 (1 - 1.06) | 0.32 | 0.087 |  |
| cg16594139 | HSD17B14 | rs67286688 | 0.02375196 | 0.531008305 | 0.3036001 | 1.03 (1 - 1.06) | 0.327 | 0.086 |  |
| cg26267310 | HSD17B14 | rs67286688 | 0.02374777 | 0.531008305 | 0.406917 | 1.03 (1 - 1.06) | 0.327 | 0.086 |  |
| cg19024700 | HSD17B14 | rs67286688 | 0.02380817 | 0.531375583 | 0.2975148 | 1.03 (1 - 1.06) | 0.327 | 0.086 |  |
| cg00449201 | CPT1C | rs9304689 | 0.04040978 | 0.597977814 | 0.3948165 | 0.91 (0.83 - 1) | 0.245 | 0.083 |  |
| cg25906705 | PLCB4 | rs6086751 | 0.01355629 | 0.479580383 | 0.4763852 | 1.09 (1.02 - 1.17) | 0.378 | 0.238 |  |
| cg08601574 | PYGB | rs8184820 | 0.04716425 | 0.617578364 | 0.986357 | 0.97 (0.94 - 1) | 0.158 | 0.06 |  |
| cg20979703 | PYGB | rs6115403 | 0.03823016 | 0.5916473 | 0.9322155 | 1.13 (1.01 - 1.28) | 0.145 | 0.06 |  |
| cg26537568 | PXMP4 | rs12624609 | 0.04221208 | 0.602865739 | 0.07735444 | 1.04 (1 - 1.08) | 0.148 | 0.391 |  |
| cg06463313 | PFKL | rs2847230 | 0.04326415 | 0.60555395 | 0.422249 | 0.95 (0.91 - 1) | 0.171 | 0.056 |  |
| cg00611469 | PISD | rs11703808 | 0.02243436 | 0.523386346 | 0.1704197 | 0.96 (0.92 - 0.99) | 0.277 | 0.079 |  |
| cg25791279 | PISD | rs56219558 | 0.02409156 | 0.53212588 | 0.4735128 | 1.05 (1.01 - 1.1) | 0.441 | 0.073 |  |
| cg10537193 | PISD | rs2092905 | 0.01060829 | 0.451582059 | 0.3457021 | 0.93 (0.88 - 0.98) | 0.514 | 0.07 |  |
| cg14247180 | PLA2G6 | rs4821747 | 0.01948014 | 0.513072717 | 0.8499875 | 1.04 (1.01 - 1.07) | 0.307 | 0.045 |  |
| cg21694044 | SLC25A17 | rs138351 | 0.03468699 | 0.579389199 | 0.546474 | 0.91 (0.83 - 0.99) | 0.257 | 0.059 |  |
| cg05698090 | CERK | rs17834926 | 0.01042007 | 0.449311563 | 0.4797517 | 0.93 (0.88 - 0.98) | 0.047 | 0.083 |  |
| cg16355231 | PEX10 | rs2645060 | 0.2115421 | 0.808738155 | 0.009262823 | 1.05 (0.97 - 1.13) | |  |  |
| cg23928726 | PEX10 | rs2645060 | 0.2103866 | 0.807755727 | 0.01550362 | 1.04 (0.98 - 1.12) | |  |  |
| cg11596239 | PEX10 | rs2840533 | 0.07643901 | 0.672218248 | 0.8061134 | 0.92 (0.83 - 1.01) | |  |  |
| cg26857521 | PEX10 | rs4648843 | 0.6875274 | 0.955330897 | 0.7478558 | 0.98 (0.91 - 1.07) | |  |  |
| cg20826345 | PEX10 | rs4648843 | 0.6876081 | 0.955356175 | 0.9755089 | 0.98 (0.9 - 1.07) | |  |  |
| cg20491328 | PEX10 | rs4531246 | 0.9361017 | 0.994575934 | 0.9125666 | 1 (0.93 - 1.07) | |  |  |
| cg12715395 | PEX10 | rs12022929 | 0.7463514 | 0.965882508 | 0.3094657 | 1.01 (0.95 - 1.07) | |  |  |
| cg25880537 | PEX10 | rs4648843 | 0.6874483 | 0.955321423 | 0.979676 | 0.98 (0.91 - 1.06) | |  |  |
| cg07507129 | PEX10 | rs13376356 | 0.7965304 | 0.973645856 | 0.8430154 | 1.01 (0.91 - 1.12) | |  |  |
| cg02275930 | PEX10 | rs10910082 | 0.5788652 | 0.933477851 | 0.3662601 | 0.98 (0.92 - 1.05) | |  |  |
| cg06736229 | PEX10 | rs2494626 | 0.8140531 | 0.976406452 | 0.9482847 | 1.01 (0.92 - 1.11) | |  |  |
| cg01564665 | PEX10 | rs4648843 | 0.6877582 | 0.955416887 | 0.7726459 | 0.98 (0.89 - 1.08) | |  |  |
| cg13183298 | PLCH2 | rs4648843 | 0.6873515 | 0.955281078 | 0.6629195 | 0.99 (0.92 - 1.06) | |  |  |
| cg15496335 | PLCH2 | rs4648843 | 0.6874909 | 0.955330897 | 0.719826 | 0.98 (0.91 - 1.06) | |  |  |
| cg00030604 | PLCH2 | rs4648843 | 0.6873512 | 0.955281078 | 0.9746658 | 0.99 (0.92 - 1.06) | |  |  |
| cg15029248 | PLCH2 | rs4648843 | 0.6876612 | 0.955360726 | 0.9702967 | 0.98 (0.9 - 1.08) | |  |  |
| cg15548859 | PLCH2 | rs4648843 | 0.6874151 | 0.955316747 | 0.3960352 | 0.99 (0.92 - 1.06) | |  |  |
| cg14032998 | PLCH2 | rs12133956 | 0.8261036 | 0.978941864 | 0.5210591 | 0.99 (0.92 - 1.07) | |  |  |
| cg12140755 | PLCH2 | rs2494626 | 0.8140949 | 0.976406452 | 0.9295676 | 0.99 (0.89 - 1.1) | |  |  |
| cg00157179 | PLCH2 | rs2494626 | 0.8141154 | 0.976406452 |  | 1.01 (0.9 - 1.14) | |  |  |
| cg05528623 | PLCH2 | rs4648843 | 0.6872802 | 0.955271179 | 0.4179793 | 0.99 (0.93 - 1.05) | |  |  |
| cg11390151 | PLCH2 | rs4648843 | 0.6875916 | 0.955356175 | 0.9919858 | 0.98 (0.9 - 1.07) | |  |  |
| cg14129430 | PLCH2 | rs4648843 | 0.6875535 | 0.955338785 | 0.7654591 | 0.98 (0.9 - 1.07) | |  |  |
| cg25221196 | PLCH2 | rs4648843 | 0.6876344 | 0.955356175 | 0.9987827 | 0.98 (0.9 - 1.07) | |  |  |
| cg11214544 | PLCH2 | rs2494626 | 0.8139865 | 0.976406452 | 0.9312315 | 1.01 (0.96 - 1.06) | |  |  |
| cg02850689 | PLCH2 | rs2494626 | 0.8140501 | 0.976406452 |  | 1.01 (0.93 - 1.1) | |  |  |
| cg07381283 | PLCH2 | rs4648843 | 0.6876107 | 0.955356175 | 0.9983372 | 0.98 (0.9 - 1.07) | |  |  |
| cg20243838 | PLCH2 | rs2494626 | 0.8140489 | 0.976406452 |  | 0.99 (0.91 - 1.08) | |  |  |
| cg16578609 | PLCH2 | rs2494626 | 0.814034 | 0.976406452 | 0.9409531 | 1.01 (0.93 - 1.09) | |  |  |
| cg12929805 | PLCH2 | rs2494626 | 0.8140291 | 0.976406452 | 0.9025606 | 1.01 (0.93 - 1.09) | |  |  |
| cg20066001 | PLCH2 | rs6683974 | 0.4949343 | 0.913917741 | 0.5382678 | 1.05 (0.91 - 1.23) | |  |  |
| cg11229415 | PLCH2 | rs2494625 | 0.1497283 | 0.753004869 | 0.2020265 | 1.08 (0.97 - 1.21) | |  |  |
| cg01486818 | PLCH2 | rs59417818 | 0.3341136 | 0.866725142 | 0.3269944 | 0.95 (0.85 - 1.06) | |  |  |
| cg23911852 | PLCH2 | rs4648843 | 0.6873163 | 0.955278777 | 0.9732098 | 0.99 (0.93 - 1.05) | |  |  |
| cg14984126 | PLCH2 | rs12727342 | 0.5410473 | 0.924031694 | 0.357669 | 1.01 (0.98 - 1.04) | |  |  |
| cg03847348 | PLCH2 | rs12049628 | 0.4902522 | 0.912353609 | 0.2627827 | 1.01 (0.98 - 1.04) | |  |  |
| cg03722487 | PLCH2 | rs4648639 | 0.4194617 | 0.892791585 | 0.5491424 | 1.03 (0.96 - 1.1) | |  |  |
| cg20932426 | PLCH2 | rs3001339 | 0.1338976 | 0.737382226 | 0.3915198 | 0.92 (0.83 - 1.03) | |  |  |
| cg18023674 | PLCH2 | rs4648843 | 0.687436 | 0.955321423 | 0.9941342 | 0.98 (0.91 - 1.06) | |  |  |
| cg24902038 | PLCH2 | rs3814298 | 0.3235561 | 0.86274249 | 0.4660574 | 0.98 (0.94 - 1.02) | |  |  |
| cg00722329 | PLCH2 | rs3762444 | 0.5803857 | 0.933477851 | 0.3946765 | 1.03 (0.93 - 1.15) | |  |  |
| cg16648140 | PLCH2 | rs3762444 | 0.5806363 | 0.93353378 | 0.7818881 | 1.03 (0.92 - 1.16) | |  |  |
| cg06350196 | PLCH2 | rs2494606 | 0.4310189 | 0.896260257 | 0.5858396 | 1.05 (0.93 - 1.18) | |  |  |
| cg24314879 | PLCH2 | rs3122922 | 0.2800187 | 0.848518428 | 0.5621444 | 1.06 (0.95 - 1.19) | |  |  |
| cg08615111 | PLCH2 | rs3122922 | 0.275407 | 0.845572553 | 0.4471073 | 1.04 (0.97 - 1.13) | |  |  |
| cg19911801 | PLCH2 | rs3122922 | 0.2747383 | 0.845420364 | 0.536924 | 1.04 (0.97 - 1.12) | |  |  |
| cg20598921 | PLCH2 | rs4648559 | 0.2894322 | 0.852261017 | 0.4518373 | 1.05 (0.96 - 1.16) | |  |  |
| cg06322310 | PLCH2 | rs3814298 | 0.3251288 | 0.863319946 | 0.4910734 | 1.04 (0.97 - 1.11) | |  |  |
| cg10961249 | PLCH2 | rs2477703 | 0.4204568 | 0.893312191 | 0.3468201 | 1.03 (0.96 - 1.1) | |  |  |
| cg24551418 | PLCH2 | rs2985862 | 0.2761866 | 0.846226603 | 0.5920838 | 1.07 (0.95 - 1.2) | |  |  |
| cg05697866 | PLCH2 | rs3791180 | 0.7556962 | 0.966870715 | 0.3041082 | 1.01 (0.96 - 1.06) | |  |  |
| cg15574442 | PLCH2 | rs3791180 | 0.755674 | 0.966870715 | 0.5130736 | 1.01 (0.96 - 1.05) | |  |  |
| cg12117396 | PLCH2 | rs4648644 | 0.2573291 | 0.836239292 | 0.2359736 | 0.98 (0.94 - 1.02) | |  |  |
| cg07944745 | PLCH2 | rs41307848 | 0.1266927 | 0.7316144 | 0.9685266 | 0.96 (0.92 - 1.01) | |  |  |
| cg15726055 | FAM213B | rs55658746 | 0.4157614 | 0.891991472 | 0.3396791 | 0.97 (0.89 - 1.05) | |  |  |
| cg00205605 | FAM213B | rs2764841 | 0.8642211 | 0.985647249 | 0.4480566 | 1 (0.97 - 1.03) | |  |  |
| cg17077288 | FAM213B | rs10752747 | 0.889466 | 0.988738816 | 0.3885827 | 1 (0.97 - 1.03) | |  |  |
| cg18932078 | FAM213B | rs2985855 | 0.9091945 | 0.991235929 | 0.4997116 | 1 (0.97 - 1.03) | |  |  |
| cg10314909 | FAM213B | rs12564460 | 0.4708294 | 0.907269643 | 0.271939 | 0.98 (0.94 - 1.03) | |  |  |
| cg00695391 | FAM213B | rs145902989 | 0.8979829 | 0.990106178 | 0.9990615 | 1 (0.94 - 1.08) | |  |  |
| cg21209485 | FAM213B | rs3748817 | 0.8643624 | 0.985647249 | 0.3937559 | 1 (0.98 - 1.02) | |  |  |
| cg19712277 | FAM213B | rs28568531 | 0.8263211 | 0.978978771 | 0.4801064 | 1 (0.98 - 1.02) | |  |  |
| cg13549940 | ACOT7 | rs72858349 | 0.3890137 | 0.885375026 | 0.5502539 | 1.02 (0.97 - 1.07) | |  |  |
| cg25706257 | ACOT7 | rs57440563 | 0.812757 | 0.976366007 | 0.7052193 | 1.01 (0.93 - 1.1) | |  |  |
| cg20630887 | ACOT7 | rs7512532 | 0.9596406 | 0.996245208 | 0.7238109 | 1 (0.89 - 1.13) | |  |  |
| cg05045598 | ACOT7 | rs61763925 | 0.6251119 | 0.943141364 | 0.7760585 | 0.97 (0.87 - 1.09) | |  |  |
| cg16049283 | ACOT7 | rs71509038 | 0.1499217 | 0.753260765 | 0.3492371 | 0.9 (0.78 - 1.04) | |  |  |
| cg10375954 | ACOT7 | rs67984858 | 0.7899937 | 0.97229443 | 0.4043484 | 1.01 (0.93 - 1.1) | |  |  |
| cg10967178 | ACOT7 | rs56292643 | 0.2743597 | 0.845420364 | 0.796673 | 1.06 (0.95 - 1.19) | |  |  |
| cg25165880 | ACOT7 | rs56292643 | 0.2720341 | 0.844716389 | 0.6678891 | 1.05 (0.96 - 1.15) | |  |  |
| cg09273516 | ACOT7 | rs55945329 | 0.3817197 | 0.881794938 | 0.9266208 | 1.06 (0.93 - 1.2) | |  |  |
| cg20971527 | ENO1 | rs11121245 | 0.2531111 | 0.83388012 | 0.3729701 | 1.04 (0.97 - 1.11) | |  |  |
| cg10443148 | ENO1 | rs10864368 | 0.2734803 | 0.845112649 | 0.110797 | 1.02 (0.98 - 1.06) | |  |  |
| cg02088347 | ENO1 | rs10864368 | 0.281191 | 0.848934664 | 0.6956582 | 1.07 (0.95 - 1.21) | |  |  |
| cg13785123 | ENO1 | rs7540170 | 0.6548011 | 0.947523974 | 0.1352613 | 0.98 (0.91 - 1.06) | |  |  |
| cg12711814 | ENO1 | rs2038904 | 0.8074683 | 0.975359034 | 0.6522265 | 1.01 (0.92 - 1.12) | |  |  |
| cg10207928 | ENO1 | rs2274971 | 0.6602504 | 0.948842444 | 0.2161957 | 0.98 (0.89 - 1.07) | |  |  |
| cg04093381 | H6PD | rs2157479 | 0.7512265 | 0.966538629 | 0.445423 | 0.99 (0.92 - 1.06) | |  |  |
| cg22601917 | H6PD | rs11121349 | 0.8744968 | 0.9868572 | 0.5511812 | 1 (0.97 - 1.02) | |  |  |
| cg04199779 | H6PD | rs11121349 | 0.8744968 | 0.9868572 | 0.5143895 | 1 (0.97 - 1.02) | |  |  |
| cg23913482 | H6PD | rs6577563 | 0.9164149 | 0.992236069 | 0.6256779 | 1 (0.92 - 1.09) | |  |  |
| cg09025327 | H6PD | rs2268175 | 0.9677575 | 0.997009931 | 0.5755577 | 1 (0.95 - 1.06) | |  |  |
| cg18785742 | H6PD | rs3753164 | 0.1260472 | 0.731058131 | 0.9455138 | 1.05 (0.99 - 1.12) | |  |  |
| cg02787675 | PIK3CD | rs9430443 | 0.1829616 | 0.784108117 | 0.7400515 | 1.08 (0.96 - 1.21) | |  |  |
| cg17467525 | PIK3CD | rs12755956 | 0.7269162 | 0.962824869 |  | 0.98 (0.9 - 1.08) | |  |  |
| cg04162034 | PIK3CD | rs144524032 | 0.4695157 | 0.907052044 | 0.3556396 | 1.01 (0.98 - 1.05) | |  |  |
| cg20994801 | PIK3CD | rs4529711 | 0.9776976 | 0.997340352 | 0.1303755 | 1 (0.95 - 1.06) | |  |  |
| cg26573321 | PIK3CD | rs4529712 | 0.9315769 | 0.993733866 | 0.1496763 | 1 (0.98 - 1.02) | |  |  |
| cg07793148 | PIK3CD | rs4529711 | 0.9776976 | 0.997340352 | 0.09198941 | 1 (0.94 - 1.06) | |  |  |
| cg20681184 | PIK3CD | rs4601595 | 0.9821071 | 0.99749749 | 0.3228374 | 1 (0.94 - 1.07) | |  |  |
| cg13457410 | PIK3CD | rs1135427 | 0.9082889 | 0.991084572 | 0.7414931 | 1 (0.95 - 1.06) | |  |  |
| cg23098018 | PIK3CD | rs114159428 | 0.06748676 | 0.657589977 | 0.4035324 | 0.87 (0.75 - 1.01) | |  |  |
| cg11947782 | PIK3CD | rs114159428 | 0.06884175 | 0.660745193 | 0.4134135 | 0.86 (0.74 - 1.01) | |  |  |
| cg01943221 | PIK3CD | rs114159428 | 0.07078284 | 0.664276538 | 0.4257749 | 0.85 (0.71 - 1.01) | |  |  |
| cg07805542 | PIK3CD | rs10864435 | 0.3563083 | 0.873584952 | 0.7454068 | 0.98 (0.94 - 1.02) | |  |  |
| cg04608004 | PIK3CD | rs12735071 | 0.8663116 | 0.985863126 | 0.8138291 | 0.99 (0.89 - 1.11) | |  |  |
| cg03517919 | PGD | rs61383940 | 0.05247668 | 0.63134583 | 0.7662226 | 0.91 (0.83 - 1) | |  |  |
| cg00147627 | PGD | rs11121559 | 0.2076059 | 0.804145588 | 0.2576397 | 1.01 (0.99 - 1.03) | |  |  |
| cg11673391 | PGD | rs79984432 | 0.3588263 | 0.87454208 | 0.816761 | 1.06 (0.94 - 1.2) | |  |  |
| cg17425144 | PEX14 | rs604814 | 0.1345556 | 0.738206341 | 0.003315749 | 0.98 (0.96 - 1.01) | |  |  |
| cg25310676 | PEX14 | rs604814 | 0.1409033 | 0.744418327 | 0.05453417 | 1.07 (0.98 - 1.16) | |  |  |
| cg07922924 | MTOR | rs12138120 | 0.1546792 | 0.757822581 | 0.4109074 | 1.08 (0.97 - 1.21) | |  |  |
| cg04310074 | MTOR | rs112991345 | 0.1772909 | 0.777394452 | 0.7698127 | 1.03 (0.99 - 1.08) | |  |  |
| cg02847674 | NPPA | rs61764037 | 0.2392193 | 0.826541733 | 0.7837006 | 1.05 (0.97 - 1.13) | |  |  |
| cg20202438 | NPPA | rs198360 | 0.6314879 | 0.944551386 | 0.3573834 | 1.01 (0.97 - 1.06) | |  |  |
| cg25341925 | NPPA | rs528704 | 0.6257373 | 0.943316678 | 0.5973316 | 1.01 (0.97 - 1.06) | |  |  |
| cg05396397 | NPPA | rs5067 | 0.6970227 | 0.957319153 | 0.4301134 | 1.01 (0.97 - 1.05) | |  |  |
| cg06193043 | NPPA | rs5067 | 0.6969963 | 0.957319153 | 0.3549198 | 1.01 (0.98 - 1.04) | |  |  |
| cg14194983 | NPPA | rs5067 | 0.697004 | 0.957319153 | 0.3435751 | 1.01 (0.97 - 1.04) | |  |  |
| cg24844545 | NPPA | rs198361 | 0.6978182 | 0.957441409 | 0.3660341 | 1.01 (0.98 - 1.03) | |  |  |
| cg13239848 | TNFRSF1B | rs1148460 | 0.5175322 | 0.918206555 | 0.8105888 | 0.98 (0.93 - 1.04) | |  |  |
| cg21393163 | TNFRSF1B | rs1148460 | 0.5183281 | 0.918405527 | 0.6122356 | 0.97 (0.9 - 1.06) | |  |  |
| cg00566331 | TNFRSF1B | rs1148460 | 0.5170193 | 0.918121604 | 0.5609449 | 1.01 (0.99 - 1.03) | |  |  |
| cg20300911 | TNFRSF1B | rs534146 | 0.9239218 | 0.992863585 | 0.7756197 | 1 (0.94 - 1.07) | |  |  |
| cg00175403 | TNFRSF1B | rs590368 | 0.9776061 | 0.997340352 | 0.7740168 | 1 (0.94 - 1.06) | |  |  |
| cg09557991 | TNFRSF1B | rs1148460 | 0.51804 | 0.918405527 | 0.8786097 | 0.98 (0.91 - 1.05) | |  |  |
| cg22677556 | TNFRSF1B | rs550132 | 0.1502776 | 0.753388331 | 0.1687123 | 0.94 (0.86 - 1.02) | |  |  |
| cg25593194 | SDHB | rs2076594 | 0.5576176 | 0.928829744 | 0.9943638 | 1.01 (0.99 - 1.02) | |  |  |
| cg20686277 | PLA2G2E | rs1046548 | 0.4636088 | 0.905380666 | 0.4459046 | 0.98 (0.93 - 1.04) | |  |  |
| cg22717825 | PLA2G2E | rs2233690 | 0.7621907 | 0.966957226 | 0.9433297 | 0.98 (0.89 - 1.09) | |  |  |
| cg23606669 | PLA2G2E | rs2233690 | 0.7619879 | 0.966957226 | 0.9821095 | 0.99 (0.94 - 1.04) | |  |  |
| cg11240043 | PLA2G2E | rs876018 | 0.7117193 | 0.95939651 | 0.7445354 | 0.98 (0.87 - 1.1) | |  |  |
| cg17988830 | PLA2G2A | rs4655000 | 0.9296648 | 0.993619962 | 0.6262187 | 1 (0.94 - 1.06) | |  |  |
| cg10993488 | PLA2G2A | rs115196230 | 0.4606012 | 0.904570953 | 0.7260358 | 0.97 (0.88 - 1.06) | |  |  |
| cg08235413 | PLA2G2A | rs6669854 | 0.08128816 | 0.67998783 | 0.2085236 | 0.89 (0.77 - 1.02) | |  |  |
| cg25755892 | PLA2G2A | rs10916683 | 0.7313133 | 0.963155736 | 0.5840438 | 0.99 (0.92 - 1.06) | |  |  |
| cg13211559 | PLA2G2A | rs55981420 | 0.9347591 | 0.994553361 | 0.7416135 | 1 (0.89 - 1.11) | |  |  |
| cg02082083 | PLA2G5 | rs656110 | 0.8947943 | 0.989717628 | 0.9561382 | 1.01 (0.91 - 1.11) | |  |  |
| cg19276110 | PLA2G5 | rs668630 | 0.4642291 | 0.905380666 | 0.6889861 | 1.04 (0.93 - 1.16) | |  |  |
| cg06222062 | PLA2G5 | rs668630 | 0.4628681 | 0.905191231 | 0.9806794 | 1.02 (0.97 - 1.06) | |  |  |
| cg25974901 | PLA2G5 | rs668630 | 0.463532 | 0.905380666 | 0.7109464 | 1.03 (0.95 - 1.12) | |  |  |
| cg11788598 | PLA2G2D | rs578459 | 0.6731563 | 0.9518494 | 0.1611322 | 0.98 (0.92 - 1.06) | |  |  |
| cg05048624 | PLA2G2D | rs142342032 | 0.4006346 | 0.887193509 | 0.4397661 | 1.06 (0.92 - 1.23) | |  |  |
| cg14076231 | PLA2G2F | rs10916716 | 0.5181539 | 0.918405527 | 0.01859033 | 0.99 (0.94 - 1.03) | |  |  |
| cg02840936 | PLA2G2C | rs58790812 | 0.4949835 | 0.913917741 | 0.01587275 | 1.02 (0.97 - 1.07) | |  |  |
| cg04605617 | PLA2G2C | rs55981420 | 0.9347567 | 0.994553361 | 0.5017165 | 1 (0.94 - 1.07) | |  |  |
| cg08042135 | PLA2G2C | rs72661102 | 0.8345693 | 0.980529314 | 0.05813259 | 1.01 (0.95 - 1.06) | |  |  |
| cg10961323 | GALE | rs12041159 | 0.8876342 | 0.987823653 | 0.9767293 | 1 (0.96 - 1.04) | |  |  |
| cg06902898 | GALE | rs1045017 | 0.8116958 | 0.97617406 | 0.9982317 | 0.99 (0.89 - 1.1) | |  |  |
| cg01604210 | GALE | rs10799804 | 0.8006281 | 0.974556905 | 0.9851201 | 1.01 (0.92 - 1.11) | |  |  |
| cg23245838 | HMGCL | rs12116511 | 0.9203798 | 0.992685898 | 0.9957813 | 0.99 (0.9 - 1.1) | |  |  |
| cg24699146 | HMGCL | rs2502979 | 0.9430421 | 0.995155087 | 0.986402 | 1 (0.97 - 1.03) | |  |  |
| cg25037394 | HMGCL | rs7514394 | 0.9956459 | 0.99909171 | 0.9908881 | 1 (0.95 - 1.06) | |  |  |
| cg09473613 | HMGCL | rs7514394 | 0.9956459 | 0.99909171 | 0.9863688 | 1 (0.96 - 1.04) | |  |  |
| cg18888403 | HMGCL | rs2502979 | 0.9430422 | 0.995155087 | 0.9967445 | 1 (0.97 - 1.03) | |  |  |
| cg06961873 | LDLRAP1 | rs10903129 | 0.8575022 | 0.985273036 | 0.2398923 | 1 (0.99 - 1.02) | |  |  |
| cg03538708 | LDLRAP1 | rs66566426 | 0.8140934 | 0.976406452 | 0.2441256 | 0.99 (0.94 - 1.05) | |  |  |
| cg10867751 | LDLRAP1 | rs6688931 | 0.3035225 | 0.857248999 | 0.4413658 | 1.06 (0.95 - 1.2) | |  |  |
| cg04344749 | LDLRAP1 | rs3856240 | 0.1953521 | 0.796210907 | 0.1733535 | 1.05 (0.97 - 1.14) | |  |  |
| cg06359931 | LDLRAP1 | rs3856239 | 0.1680455 | 0.770397718 | 0.02877873 | 1.03 (0.99 - 1.08) | |  |  |
| cg10176185 | LDLRAP1 | rs6661159 | 0.1796163 | 0.779887872 | 0.02759667 | 0.97 (0.92 - 1.01) | |  |  |
| cg00915556 | LDLRAP1 | rs4075184 | 0.1712809 | 0.77295689 | 0.03951134 | 0.96 (0.9 - 1.02) | |  |  |
| cg21452808 | LDLRAP1 | rs4659356 | 0.6316158 | 0.944551386 | 0.07036737 | 1.03 (0.92 - 1.15) | |  |  |
| cg16174809 | PAFAH2 | rs933078 | 0.6148101 | 0.941074865 | 0.08086131 | 0.99 (0.96 - 1.02) | |  |  |
| cg13577188 | MED18 | rs2840758 | 0.4315451 | 0.896400972 | 0.5588831 | 0.98 (0.92 - 1.03) | |  |  |
| cg00017546 | MED18 | rs12144013 | 0.3432871 | 0.869752903 | 0.5649473 | 0.98 (0.93 - 1.03) | |  |  |
| cg14407437 | FABP3 | rs12562783 | 0.6537659 | 0.947449974 | 0.8309696 | 1.02 (0.95 - 1.09) | |  |  |
| cg18368411 | FABP3 | rs7514754 | 0.6444336 | 0.94603711 | 0.9358089 | 1.03 (0.91 - 1.16) | |  |  |
| cg19316148 | FABP3 | rs12025507 | 0.6412775 | 0.94546956 | 0.8812265 | 1.02 (0.94 - 1.1) | |  |  |
| cg20318096 | FABP3 | rs12562783 | 0.6538531 | 0.947449974 | 0.812827 | 1.02 (0.94 - 1.1) | |  |  |
| cg07110043 | FABP3 | rs10914344 | 0.9297337 | 0.993619962 | 0.6263389 | 1 (0.98 - 1.02) | |  |  |
| cg13567986 | MTF1 | rs1082867 | 0.1424145 | 0.745836843 | 0.04282583 | 1.09 (0.97 - 1.23) | |  |  |
| cg16249798 | MTF1 | rs148408444 | 0.6239718 | 0.942973149 | 0.1301428 | 0.97 (0.87 - 1.09) | |  |  |
| cg03523189 | INPP5B | rs35655346 | 0.6074623 | 0.939512117 | 0.2563548 | 1.02 (0.95 - 1.1) | |  |  |
| cg23262274 | INPP5B | rs34354043 | 0.5337675 | 0.922711105 | 0.6037754 | 0.97 (0.86 - 1.08) | |  |  |
| cg17949727 | INPP5B | rs9727223 | 0.9335384 | 0.994231155 | 0.1497902 | 1 (0.91 - 1.09) | |  |  |
| cg10784030 | INPP5B | rs2279261 | 0.4324325 | 0.896548811 | 0.04305016 | 0.96 (0.87 - 1.06) | |  |  |
| cg05749969 | INPP5B | rs9727223 | 0.9335384 | 0.994231155 | 0.08889897 | 1 (0.91 - 1.09) | |  |  |
| cg02309273 | INPP5B | rs28678708 | 0.9250497 | 0.992990172 | 0.1224456 | 1 (0.91 - 1.09) | |  |  |
| cg01917259 | INPP5B | rs4462102 | 0.5990888 | 0.937326581 | 0.3206882 | 1.04 (0.9 - 1.2) | |  |  |
| cg17748822 | OXCT2 | rs2248883 | 0.5475493 | 0.925996596 | 0.04462669 | 1.02 (0.96 - 1.07) | |  |  |
| cg11296826 | OXCT2 | rs79473113 | 0.7366158 | 0.964338341 | 0.1988039 | 0.99 (0.92 - 1.06) | |  |  |
| cg06804873 | MFSD2A | rs7529794 | 0.6653973 | 0.950486292 | 0.2313155 | 1 (0.98 - 1.01) | |  |  |
| cg06809635 | PPT1 | rs77333675 | 0.3310305 | 0.865575642 | 0.7822001 | 1.06 (0.94 - 1.2) | |  |  |
| cg04560534 | PPT1 | rs6600313 | 0.2810715 | 0.848934664 | 0.9858445 | 1.06 (0.95 - 1.18) | |  |  |
| cg22716190 | PPT1 | rs4660390 | 0.09256643 | 0.698670111 | 0.8736369 | 0.98 (0.96 - 1) | |  |  |
| cg15986668 | NFYC | rs10158384 | 0.9586172 | 0.996245208 | 0.5962787 | 1 (0.94 - 1.07) | |  |  |
| cg13735974 | NFYC | rs116658025 | 0.8649399 | 0.985783659 | 0.3967421 | 1.01 (0.91 - 1.12) | |  |  |
| cg10336144 | NFYC | rs12239413 | 0.8649361 | 0.985783659 | 0.3127889 | 1.01 (0.9 - 1.13) | |  |  |
| cg14796708 | NFYC | rs2223486 | 0.449968 | 0.90211232 | 0.6008928 | 0.97 (0.89 - 1.05) | |  |  |
| cg13573746 | NFYC | rs12565343 | 0.7729177 | 0.968523088 |  | 0.98 (0.87 - 1.1) | |  |  |
| cg06792911 | SLC2A1 | rs17387775 | 0.7945355 | 0.973165555 | 0.5068409 | 0.99 (0.94 - 1.05) | |  |  |
| cg12656391 | SLC2A1 | rs17387775 | 0.7944825 | 0.973165555 | 0.2719942 | 1 (0.97 - 1.02) | |  |  |
| cg00102166 | SLC2A1 | rs17387775 | 0.794485 | 0.973165555 | 0.2989886 | 1 (0.97 - 1.02) | |  |  |
| cg09824328 | SLC2A1 | rs17387775 | 0.7944838 | 0.973165555 | 0.3890249 | 1 (0.97 - 1.02) | |  |  |
| cg12101479 | SLC2A1 | rs17387775 | 0.7946667 | 0.973186097 | 0.3779521 | 1.01 (0.92 - 1.12) | |  |  |
| cg09322534 | SLC2A1 | rs17387775 | 0.7946345 | 0.973186097 | 0.2975089 | 1.01 (0.93 - 1.1) | |  |  |
| cg00568910 | SLC2A1 | rs841839 | 0.1853651 | 0.786238476 | 0.8272893 | 0.98 (0.94 - 1.01) | |  |  |
| cg18345219 | HYI | rs2782651 | 0.975169 | 0.997273118 | 0.4841868 | 1 (0.94 - 1.06) | |  |  |
| cg03936071 | B4GALT2 | rs1766970 | 0.7920489 | 0.972679961 | 0.9728725 | 1.01 (0.96 - 1.05) | |  |  |
| cg06754987 | B4GALT2 | rs41270403 | 0.7293369 | 0.963023372 | 0.9877903 | 1.01 (0.94 - 1.09) | |  |  |
| cg17331566 | B4GALT2 | rs7555 | 0.8008922 | 0.974623566 | 0.9495935 | 1.01 (0.94 - 1.08) | |  |  |
| cg11337388 | B4GALT2 | rs2906596 | 0.7857175 | 0.972064384 | 0.9676259 | 1.01 (0.93 - 1.09) | |  |  |
| cg02416986 | B4GALT2 | rs2906596 | 0.7857201 | 0.972064384 | 0.9490713 | 1.01 (0.93 - 1.1) | |  |  |
| cg09666532 | B4GALT2 | rs72683973 | 0.7882349 | 0.972251328 | 0.9646813 | 1 (0.97 - 1.03) | |  |  |
| cg24332710 | AKR1A1 | rs61788356 | 0.3326701 | 0.865977956 | 0.2654492 | 0.95 (0.85 - 1.06) | |  |  |
| cg04486013 | AKR1A1 | rs71500084 | 0.3260833 | 0.864014073 | 0.3873578 | 0.95 (0.86 - 1.05) | |  |  |
| cg08644498 | PIK3R3 | rs1768809 | 0.1193385 | 0.723173685 | 0.4805073 | 0.96 (0.9 - 1.01) | |  |  |
| cg27584146 | PIK3R3 | rs1707334 | 0.1454813 | 0.749837636 | 0.2521496 | 0.91 (0.8 - 1.03) | |  |  |
| cg19321695 | PIK3R3 | rs12137934 | 0.6797522 | 0.953734838 | 0.8762311 | 1.01 (0.95 - 1.08) | |  |  |
| cg04975920 | PIK3R3 | rs2292487 | 0.2832026 | 0.849897026 | 0.9581844 | 1.05 (0.96 - 1.14) | |  |  |
| cg25369262 | PIK3R3 | rs10890384 | 0.1412152 | 0.744470115 | 0.9429553 | 1.02 (0.99 - 1.05) | |  |  |
| cg15198148 | FAAH | rs11576941 | 0.9419324 | 0.99490853 | 0.2768367 | 1 (0.98 - 1.02) | |  |  |
| cg06911238 | FAAH | rs12137934 | 0.6803419 | 0.953778454 | 0.5612077 | 0.98 (0.87 - 1.1) | |  |  |
| cg18261491 | FAAH | rs113745511 | 0.7279874 | 0.962973957 | 0.881852 | 0.99 (0.93 - 1.05) | |  |  |
| cg16267850 | FAAH | rs72677602 | 0.7507647 | 0.96647031 | 0.6269034 | 0.99 (0.94 - 1.04) | |  |  |
| cg20271029 | FAAH | rs12137934 | 0.6802785 | 0.953778454 | 0.7876651 | 0.98 (0.87 - 1.09) | |  |  |
| cg01412524 | FAAH | rs2295465 | 0.7507168 | 0.96647031 | 0.8458922 | 1.02 (0.9 - 1.16) | |  |  |
| cg01134183 | FAAH | rs2295465 | 0.7507075 | 0.96647031 | 0.6818551 | 1.02 (0.9 - 1.16) | |  |  |
| cg25706281 | FAAH | rs12562440 | 0.3552732 | 0.872952434 | 0.9789556 | 1.03 (0.97 - 1.1) | |  |  |
| cg18918426 | FAAH | rs72890524 | 0.5190517 | 0.918405527 | 0.6689719 | 0.98 (0.93 - 1.04) | |  |  |
| cg06755263 | FAAH | rs35361357 | 0.928442 | 0.993485045 | 0.4719723 | 1 (0.94 - 1.07) | |  |  |
| cg07364646 | OSBPL9 | rs12127044 | 0.9379972 | 0.994664173 | 0.4333642 | 1 (0.91 - 1.11) | |  |  |
| cg10701801 | OSBPL9 | rs12064693 | 0.6544417 | 0.947456843 | 0.621396 | 1 (0.97 - 1.02) | |  |  |
| cg10385089 | OSBPL9 | rs79078549 | 0.3778876 | 0.880717157 | 0.2039256 | 0.89 (0.7 - 1.15) | |  |  |
| cg22039898 | GPX7 | rs835341 | 0.1575108 | 0.76089282 | 0.7648366 | 0.97 (0.94 - 1.01) | |  |  |
| cg01400822 | GPX7 | rs3753754 | 0.1294232 | 0.734145308 | 0.6587323 | 1.05 (0.99 - 1.11) | |  |  |
| cg18087326 | GPX7 | rs6588431 | 0.4978495 | 0.914916216 | 0.4527658 | 1.01 (0.98 - 1.03) | |  |  |
| cg12640469 | GPX7 | rs6588431 | 0.4979072 | 0.914916216 | 0.5402639 | 1.01 (0.98 - 1.04) | |  |  |
| cg22129364 | GPX7 | rs6588431 | 0.4993095 | 0.915127849 | 0.2232769 | 1.03 (0.95 - 1.12) | |  |  |
| cg23272399 | GPX7 | rs28609180 | 0.07182267 | 0.66744357 | 0.3046662 | 1.05 (1 - 1.11) | |  |  |
| cg02453146 | GPX7 | rs28609180 | 0.07160827 | 0.667022779 | 0.632065 | 1.05 (1 - 1.11) | |  |  |
| cg09161043 | GPX7 | rs835342 | 0.1554025 | 0.758293156 | 0.8729167 | 1.03 (0.99 - 1.07) | |  |  |
| cg24543286 | SCP2 | rs56222568 | 0.2347908 | 0.822972983 | 0.6003258 | 0.95 (0.88 - 1.03) | |  |  |
| cg03609269 | SCP2 | rs11585570 | 0.4293404 | 0.895626154 | 0.280105 | 0.96 (0.87 - 1.06) | |  |  |
| cg12220753 | SCP2 | rs56222568 | 0.2347375 | 0.822911955 | 0.5697091 | 0.95 (0.88 - 1.03) | |  |  |
| cg13685833 | SCP2 | rs12040433 | 0.09516365 | 0.70058811 | 0.2176794 | 0.96 (0.91 - 1.01) | |  |  |
| cg04310824 | SCP2 | rs11206043 | 0.3295358 | 0.864736842 | 0.3358908 | 0.96 (0.88 - 1.05) | |  |  |
| cg03579872 | SCP2 | rs12037492 | 0.3275211 | 0.864356154 | 0.3575278 | 0.98 (0.94 - 1.02) | |  |  |
| cg01802117 | SCP2 | rs12405280 | 0.4250735 | 0.894382935 | 0.2199603 | 0.98 (0.95 - 1.02) | |  |  |
| cg05232215 | SCP2 | rs56222568 | 0.2316423 | 0.821320684 | 0.5630536 | 0.98 (0.95 - 1.01) | |  |  |
| cg13078931 | SCP2 | rs550561 | 0.2990068 | 0.856739595 | 0.3802033 | 1.04 (0.97 - 1.12) | |  |  |
| cg00581603 | SCP2 | rs56222568 | 0.234148 | 0.822754421 | 0.5791593 | 1.04 (0.97 - 1.11) | |  |  |
| cg24152080 | SCP2 | rs75674851 | 0.1750211 | 0.775634303 | 0.1274411 | 1.02 (0.99 - 1.06) | |  |  |
| cg23207412 | CPT2 | rs3102042 | 0.9765333 | 0.997273118 | 0.1134842 | 1 (0.93 - 1.08) | |  |  |
| cg20780708 | CPT2 | rs72673121 | 0.9305706 | 0.99371844 | 0.1367894 | 1 (0.91 - 1.09) | |  |  |
| cg20002523 | CYB5RL | rs11206303 | 0.1926468 | 0.793952388 | 0.09633207 | 0.93 (0.84 - 1.04) | |  |  |
| cg10527784 | CYB5RL | rs10749695 | 0.195521 | 0.796376419 | 0.3330513 | 0.94 (0.85 - 1.03) | |  |  |
| cg00782828 | ACOT11 | rs12125480 | 0.3842945 | 0.882709713 | 0.264672 | 1.05 (0.95 - 1.16) | |  |  |
| cg24834436 | ACOT11 | rs299862 | 0.3074437 | 0.857806894 | 0.37733 | 1.02 (0.98 - 1.07) | |  |  |
| cg08106066 | ACOT11 | rs12125480 | 0.3834398 | 0.882383062 | 0.09655636 | 1.04 (0.95 - 1.13) | |  |  |
| cg17085123 | ACOT11 | rs382327 | 0.9111509 | 0.991697329 | 0.1776735 | 1 (0.97 - 1.02) | |  |  |
| cg03214052 | ACOT11 | rs77712461 | 0.2307158 | 0.820837594 | 0.8462859 | 1.06 (0.96 - 1.18) | |  |  |
| cg00868131 | ACOT11 | rs190962 | 0.2806292 | 0.848934664 | 0.3547303 | 0.94 (0.85 - 1.05) | |  |  |
| cg04605287 | ACOT11 | rs299877 | 0.6313541 | 0.944551386 | 0.2188381 | 0.99 (0.95 - 1.03) | |  |  |
| cg18755543 | ACOT11 | rs299877 | 0.6313115 | 0.944551386 | 0.1496255 | 0.99 (0.95 - 1.03) | |  |  |
| cg16509577 | ACOT11 | rs3753011 | 0.1425533 | 0.745947826 | 0.09023289 | 1.04 (0.99 - 1.1) | |  |  |
| cg10710218 | ACOT11 | rs11589310 | 0.3890532 | 0.885376638 |  | 1.05 (0.94 - 1.17) | |  |  |
| cg21448423 | ACOT11 | rs299872 | 0.05439726 | 0.636581153 | 0.2175772 | 1.05 (1 - 1.11) | |  |  |
| cg01802772 | ACOT11 | rs299872 | 0.05245546 | 0.63134583 | 0.321536 | 1.02 (1 - 1.04) | |  |  |
| cg01445479 | ACOT11 | rs299871 | 0.2879759 | 0.851772784 | 0.7409758 | 0.95 (0.87 - 1.04) | |  |  |
| cg15490897 | ACOT11 | rs300271 | 0.5006449 | 0.915612607 | 0.003172075 | 1.02 (0.97 - 1.06) | |  |  |
| cg18180407 | ACOT11 | rs17110749 | 0.3085391 | 0.858035676 | 0.3258495 | 1.02 (0.98 - 1.06) | |  |  |
| cg01877155 | DHCR24 | rs35953780 | 0.9738249 | 0.997273118 | 0.12611 | 1 (0.96 - 1.04) | |  |  |
| cg27168858 | DHCR24 | rs6676774 | 0.6371173 | 0.945019516 | 0.2205636 | 0.98 (0.92 - 1.05) | |  |  |
| cg10073091 | DHCR24 | rs12733906 | 0.1775082 | 0.77770691 | 0.6705386 | 0.95 (0.87 - 1.03) | |  |  |
| cg25536676 | DHCR24 | rs687146 | 0.3817906 | 0.881839098 | 0.5212475 | 0.95 (0.85 - 1.06) | |  |  |
| cg00045070 | PCSK9 | rs2479409 | 0.7968953 | 0.973691728 | 0.1434675 | 1 (0.98 - 1.02) | |  |  |
| cg26047355 | PCSK9 | rs2495499 | 0.07860762 | 0.674602752 | 0.3760799 | 1.08 (0.99 - 1.17) | |  |  |
| cg14993491 | PCSK9 | rs2495499 | 0.07759969 | 0.674294051 | 0.5149814 | 1.07 (0.99 - 1.15) | |  |  |
| cg19249107 | PCSK9 | rs41294819 | 0.3855202 | 0.883329892 | 0.650941 | 1.04 (0.95 - 1.14) | |  |  |
| cg17826594 | PCSK9 | rs28385704 | 0.3709323 | 0.878517937 | 0.6107953 | 1.03 (0.96 - 1.11) | |  |  |
| cg18864358 | PCSK9 | rs2986947 | 0.07798174 | 0.674602752 | 0.3618176 | 1.07 (0.99 - 1.16) | |  |  |
| cg24072166 | PCSK9 | rs2454215 | 0.0831233 | 0.683996038 | 0.5075385 | 0.91 (0.82 - 1.01) | |  |  |
| cg02920851 | PCSK9 | rs471178 | 0.0843151 | 0.686545366 | 0.8268821 | 1.1 (0.99 - 1.22) | |  |  |
| cg20161095 | PPAP2B | rs12140413 | 0.1413355 | 0.744608602 | 0.4463819 | 1.08 (0.98 - 1.19) | |  |  |
| cg16573726 | PPAP2B | rs9436534 | 0.9508892 | 0.996245208 | 0.1626872 | 1 (0.9 - 1.12) |  |  |  |
| cg10132010 | PPAP2B | rs56170783 | 0.1642244 | 0.766489776 | 0.9182451 | 0.93 (0.85 - 1.03) | |  |  |
| cg26837800 | PPAP2B | rs72664324 | 0.2270532 | 0.818779833 | 0.6364388 | 1.06 (0.96 - 1.17) | |  |  |
| cg20687616 | PPAP2B | rs10789020 | 0.8605738 | 0.985444341 | 0.763372 | 1.01 (0.92 - 1.11) | |  |  |
| cg15576338 | PPAP2B | rs3005924 | 0.438439 | 0.898813391 | 0.4143539 | 1.05 (0.93 - 1.18) | |  |  |
| cg26248114 | PPAP2B | rs1953116 | 0.6752437 | 0.952559899 | 0.9021571 | 0.99 (0.93 - 1.05) | |  |  |
| cg12427321 | PPAP2B | rs56170783 | 0.1680986 | 0.770397718 | 0.8136677 | 1.08 (0.97 - 1.22) | |  |  |
| cg07477602 | PPAP2B | rs8016 | 0.1943725 | 0.795217764 | 0.5996456 | 0.96 (0.91 - 1.02) | |  |  |
| cg12180551 | PPAP2B | rs4912377 | 0.7327263 | 0.96336466 | 0.9888561 | 1.01 (0.94 - 1.09) | |  |  |
| cg11682697 | PPAP2B | rs1759752 | 0.7254479 | 0.962429035 | 0.9934143 | 1.02 (0.92 - 1.13) | |  |  |
| cg22396959 | PPAP2B | rs12751490 | 0.5631654 | 0.930212284 | 0.9604808 | 0.97 (0.88 - 1.07) | |  |  |
| cg13320211 | PPAP2B | rs933001 | 0.4299388 | 0.895884591 | 0.5607791 | 1.01 (0.99 - 1.03) | |  |  |
| cg02468627 | PPAP2B | rs1999537 | 0.2856268 | 0.851128133 | 0.9528831 | 0.96 (0.89 - 1.03) | |  |  |
| cg16505550 | PPAP2B | rs11799599 | 0.3726352 | 0.879218269 | 0.7961495 | 1.04 (0.96 - 1.12) | |  |  |
| cg09935045 | PRKAA2 | rs11804779 | 0.3449796 | 0.870221985 | 0.7779526 | 0.98 (0.95 - 1.02) | |  |  |
| cg26815229 | CYP2J2 | rs11207549 | 0.1531514 | 0.755875483 | 0.1121703 | 1.03 (0.99 - 1.08) | |  |  |
| cg24370698 | PGM1 | rs11582264 | 0.3145532 | 0.859942033 | 0.9832941 | 0.98 (0.94 - 1.02) | |  |  |
| cg24585453 | PGM1 | rs72918611 | 0.5446706 | 0.925190374 | 0.9774181 | 0.99 (0.96 - 1.02) | |  |  |
| cg03373115 | PGM1 | rs11582264 | 0.3143006 | 0.859879081 | 0.9594535 | 0.98 (0.94 - 1.02) | |  |  |
| cg05762488 | PGM1 | rs8294 | 0.1811537 | 0.782134528 | 0.9997636 | 0.98 (0.94 - 1.01) | |  |  |
| cg25307371 | LEPR | rs188679257 | 0.2161504 | 0.811774477 | 0.838398 | 1.06 (0.97 - 1.16) | |  |  |
| cg14199090 | LEPR | rs6697315 | 0.4550063 | 0.903368063 | 0.3994059 | 1.04 (0.94 - 1.14) | |  |  |
| cg03514351 | LEPR | rs1171278 | 0.7654196 | 0.967146158 | 0.5349053 | 1.01 (0.94 - 1.09) | |  |  |
| cg16265717 | LEPR | rs1171277 | 0.7086945 | 0.959271339 | 0.6177202 | 1.01 (0.94 - 1.09) | |  |  |
| cg17868936 | SLC44A5 | rs601788 | 0.320093 | 0.862134112 | 0.9612698 | 1.07 (0.94 - 1.21) | |  |  |
| cg07381464 | SLC44A5 | rs6593584 | 0.7968849 | 0.973691728 | 0.1530591 | 1.02 (0.9 - 1.15) | |  |  |
| cg03662422 | SLC44A5 | rs7513459 | 0.4015659 | 0.887423359 | 0.2277156 | 0.96 (0.88 - 1.05) | |  |  |
| cg14161412 | SLC44A5 | rs1249822 | 0.3825731 | 0.88224618 | 0.741764 | 1.05 (0.94 - 1.17) | |  |  |
| cg22875332 | ACADM | rs1251078 | 0.9907597 | 0.998338422 | 0.02484191 | 1 (0.98 - 1.02) | |  |  |
| cg10523679 | ACADM | rs1251078 | 0.9907597 | 0.998338422 | 0.02426226 | 1 (0.98 - 1.02) | |  |  |
| cg03433033 | ACADM | rs1251078 | 0.9907597 | 0.998338422 | 0.02440084 | 1 (0.98 - 1.02) | |  |  |
| cg05467918 | ACADM | rs77773255 | 0.1117223 | 0.7137217 | 0.5018891 | 1.04 (0.99 - 1.09) | |  |  |
| cg24215727 | ABCD3 | rs2786906 | 0.7719231 | 0.9683852 | 0.3197558 | 1.02 (0.91 - 1.13) | |  |  |
| cg20059151 | SLC44A3 | rs9432388 | 0.05204182 | 0.630174044 | 0.4920687 | 0.96 (0.93 - 1) | |  |  |
| cg14981637 | SLC44A3 | rs11165252 | 0.6676693 | 0.950925627 | 0.2139195 | 0.97 (0.87 - 1.1) | |  |  |
| cg18396714 | SLC44A3 | rs61774580 | 0.0519052 | 0.630123075 | 0.783188 | 0.91 (0.82 - 1) | |  |  |
| cg11582189 | SLC44A3 | rs947134 | 0.1410584 | 0.744454276 | 0.413217 | 1.06 (0.98 - 1.15) | |  |  |
| cg19600538 | SLC44A3 | rs10489810 | 0.8558148 | 0.984734876 | 0.01075161 | 1 (0.96 - 1.03) | |  |  |
| cg06033721 | SLC44A3 | rs3849308 | 0.4397434 | 0.899376731 | 0.01567634 | 1.05 (0.93 - 1.18) | |  |  |
| cg16724148 | AGL | rs550941 | 0.7059049 | 0.959060157 | 0.000565115 | 1.01 (0.97 - 1.05) | |  |  |
| cg16900618 | AMY2B | rs79043596 | 0.7967324 | 0.973650175 | 0.8270018 | 0.99 (0.89 - 1.1) | |  |  |
| cg11391462 | AMY2B | rs12075086 | 0.7920492 | 0.972679961 | 0.8255477 | 0.99 (0.93 - 1.06) | |  |  |
| cg22346081 | SORT1 | rs112014867 | 0.065577 | 0.655153727 |  | 1.21 (0.99 - 1.48) | |  |  |
| cg13926338 | SORT1 | rs4120621 | 0.1314986 | 0.73557588 | 0.001024004 | 1.04 (0.99 - 1.1) | |  |  |
| cg02175308 | SORT1 | rs3879448 | 0.1160926 | 0.71948956 | 0.002684938 | 1.03 (0.99 - 1.06) | |  |  |
| cg23032129 | SORT1 | rs4120621 | 0.1293348 | 0.734145308 | 0.004833864 | 1.02 (0.99 - 1.06) | |  |  |
| cg16988986 | SORT1 | rs10745356 | 0.1228231 | 0.727854352 | 0.002473416 | 1.03 (0.99 - 1.06) | |  |  |
| cg23616212 | SORT1 | rs3879448 | 0.117306 | 0.720798285 | 0.001866082 | 1.04 (0.99 - 1.09) | |  |  |
| cg08644463 | GNAI3 | rs6658855 | 0.3224104 | 0.862390108 | 0.003312521 | 0.98 (0.95 - 1.02) | |  |  |
| cg15069758 | GSTM4 | rs3754450 | 0.2802139 | 0.848646133 | 0.004292334 | 1.02 (0.98 - 1.07) | |  |  |
| cg22247664 | GSTM4 | rs11101980 | 0.3126275 | 0.85912998 | 0.005173201 | 0.99 (0.96 - 1.01) | |  |  |
| cg07569194 | GSTM4 | rs11101980 | 0.3133382 | 0.85912998 | 0.01027185 | 1.02 (0.98 - 1.07) | |  |  |
| cg05793930 | GSTM4 | rs3754450 | 0.2828582 | 0.84983335 | 0.101413 | 1.04 (0.97 - 1.13) | |  |  |
| cg23874078 | CEPT1 | rs3762374 | 0.4299334 | 0.895884591 | 0.07610824 | 0.97 (0.9 - 1.05) | |  |  |
| cg26159933 | CHIA | rs12026825 | 0.3079808 | 0.858035676 | 0.5116187 | 0.96 (0.88 - 1.04) | |  |  |
| cg27497781 | CHIA | rs12026825 | 0.305108 | 0.857248999 | 0.384102 | 1.02 (0.98 - 1.06) | |  |  |
| cg05962781 | TSHB | rs6537852 | 0.07805828 | 0.674602752 | 0.9255333 | 1.06 (0.99 - 1.12) | |  |  |
| cg18791730 | HAO2 | rs3753263 | 0.7405749 | 0.964584733 | 0.2502852 | 0.99 (0.9 - 1.08) | |  |  |
| cg17951978 | HSD3B2 | rs1341012 | 0.1108942 | 0.713163853 | 0.2428482 | 0.99 (0.98 - 1) | |  |  |
| cg16246545 | PHGDH | rs11583993 | 0.5156122 | 0.917362732 | 0.005739787 | 0.99 (0.95 - 1.03) | |  |  |
| cg14476101 | PHGDH | rs11583993 | 0.5155742 | 0.917362732 | 0.002427226 | 0.99 (0.95 - 1.03) | |  |  |
| cg04086443 | HMGCS2 | rs667226 | 0.2768021 | 0.84664193 | 0.1746329 | 1.05 (0.96 - 1.16) | |  |  |
| cg04870460 | PRKAB2 | rs12144240 | 0.1592113 | 0.762649029 | 0.07604179 | 0.95 (0.87 - 1.02) | |  |  |
| cg19750321 | ARNT | rs61813920 | 0.950567 | 0.996245208 | 0.936398 | 1.01 (0.78 - 1.3) | |  |  |
| cg07422880 | CERS2 | rs12405726 | 0.5508225 | 0.92637421 | 0.1519665 | 1.03 (0.94 - 1.13) | |  |  |
| cg26058502 | CERS2 | rs12405726 | 0.5499163 | 0.92613449 | 0.1625633 | 1.02 (0.96 - 1.08) | |  |  |
| cg18611122 | CERS2 | rs11579736 | 0.5503 | 0.92637421 | 0.09178011 | 1.02 (0.95 - 1.1) | |  |  |
| cg22012583 | CERS2 | rs143887202 | 0.5728817 | 0.931863025 | 0.03721723 | 1.03 (0.93 - 1.13) | |  |  |
| cg13073141 | CERS2 | rs143887202 | 0.5729279 | 0.931881334 | 0.05194531 | 1.03 (0.93 - 1.13) | |  |  |
| cg05630111 | CERS2 | rs143887202 | 0.5727379 | 0.931829072 | 0.1067941 | 1.03 (0.94 - 1.12) | |  |  |
| cg11825431 | TNFAIP8L2 | rs2067606 | 0.7964409 | 0.973587339 | 0.1019746 | 1.01 (0.97 - 1.04) | |  |  |
| cg25306932 | TNFAIP8L2 | rs11204773 | 0.560345 | 0.929984949 | 0.2209793 | 1.03 (0.93 - 1.14) | |  |  |
| cg00107782 | PI4KB | rs74823216 | 0.6247869 | 0.943111734 | 0.08880613 | 0.98 (0.92 - 1.05) | |  |  |
| cg02145668 | PI4KB | rs74823216 | 0.6247155 | 0.943111734 | 0.07949127 | 0.98 (0.93 - 1.05) | |  |  |
| cg27529647 | PI4KB | rs146883961 | 0.6243504 | 0.943012135 | 0.04398507 | 0.99 (0.96 - 1.03) | |  |  |
| cg21211478 | THEM5 | rs2279503 | 0.3020326 | 0.857248999 | 0.3676067 | 1.07 (0.94 - 1.22) | |  |  |
| cg01062247 | THEM5 | rs1056037 | 0.3591761 | 0.87479011 | 0.0473347 | 0.98 (0.95 - 1.02) | |  |  |
| cg13496167 | THEM5 | rs111464999 | 0.1322291 | 0.736319651 | 0.3982778 | 0.98 (0.97 - 1) | |  |  |
| cg26347189 | THEM4 | rs1490187 | 0.2418221 | 0.828160144 | 0.126411 | 1.07 (0.96 - 1.18) | |  |  |
| cg23231729 | THEM4 | rs76069678 | 0.1466698 | 0.750574538 | 0.421104 | 0.9 (0.78 - 1.04) | |  |  |
| cg05927068 | THEM4 | rs11204915 | 0.06297245 | 0.648772565 | 0.9388128 | 1.1 (0.99 - 1.21) | |  |  |
| cg05340162 | THEM4 | rs113621934 | 0.1362073 | 0.738616218 | 0.6269429 | 1.06 (0.98 - 1.15) | |  |  |
| cg15628959 | THEM4 | rs76069678 | 0.1386886 | 0.741387172 | 0.8046112 | 1.07 (0.98 - 1.17) | |  |  |
| cg09063149 | THEM4 | rs113621934 | 0.13732 | 0.739635827 | 0.9144188 | 1.07 (0.98 - 1.17) | |  |  |
| cg21860360 | NPR1 | rs7533987 | 0.2064991 | 0.803321837 | 0.997264 | 1.01 (0.99 - 1.03) | |  |  |
| cg26904702 | SLC27A3 | rs41265191 | 0.3428264 | 0.869689834 | 0.9264016 | 1.05 (0.95 - 1.17) | |  |  |
| cg21279955 | SLC27A3 | rs12097583 | 0.1965725 | 0.797518936 | 0.9624887 | 1.06 (0.97 - 1.15) | |  |  |
| cg19773045 | SLC27A3 | rs12097583 | 0.1966218 | 0.797518936 | 0.9498207 | 1.06 (0.97 - 1.15) | |  |  |
| cg06239526 | SLC27A3 | rs12097583 | 0.1998095 | 0.798350489 | 0.9755921 | 1.08 (0.96 - 1.21) | |  |  |
| cg24408896 | SLC27A3 | rs12097583 | 0.1979731 | 0.797730642 | 0.8912308 | 1.07 (0.97 - 1.18) | |  |  |
| cg16247817 | SLC27A3 | rs12097583 | 0.1966496 | 0.797544691 | 0.8925099 | 1.06 (0.97 - 1.15) | |  |  |
| cg25741879 | SLC27A3 | rs12068175 | 0.8758862 | 0.986942168 | 0.3432119 | 1.01 (0.93 - 1.09) | |  |  |
| cg26182859 | SLC27A3 | rs12068175 | 0.8758885 | 0.986942168 | 0.1503463 | 1.01 (0.93 - 1.1) | |  |  |
| cg09762021 | SLC27A3 | rs12068175 | 0.8758992 | 0.986942168 | 0.083836 | 1.01 (0.92 - 1.11) | |  |  |
| cg12067764 | SLC27A3 | rs12068175 | 0.8758966 | 0.986942168 | 0.1171077 | 1.01 (0.92 - 1.11) | |  |  |
| cg13502252 | SLC27A3 | rs12030242 | 0.6291241 | 0.944409586 | 0.4595207 | 1.03 (0.92 - 1.14) | |  |  |
| cg13064789 | SLC27A3 | rs12068175 | 0.8758904 | 0.986942168 | 0.1756339 | 1.01 (0.92 - 1.1) | |  |  |
| cg07567724 | SLC27A3 | rs4451582 | 0.695914 | 0.957319153 | 0.7442775 | 1.01 (0.97 - 1.05) | |  |  |
| cg09895920 | CREB3L4 | rs6661009 | 0.636866 | 0.94495427 | 0.6418628 | 1.02 (0.93 - 1.12) | |  |  |
| cg23803022 | PMVK | rs6699043 | 0.1081869 | 0.711801172 | 0.4756806 | 1.07 (0.99 - 1.16) | |  |  |
| cg20065217 | PMVK | rs4845696 | 0.1035514 | 0.707034093 | 0.4990012 | 1.05 (0.99 - 1.12) | |  |  |
| cg16318349 | PMVK | rs4845685 | 0.1191379 | 0.722667515 | 0.2934717 | 0.96 (0.9 - 1.01) | |  |  |
| cg09686639 | SDHC | rs148085578 | 0.9063616 | 0.990902701 | 0.7526079 | 1.01 (0.92 - 1.09) | |  |  |
| cg12036621 | SDHC | rs142069422 | 0.8216505 | 0.97818496 | 0.8713803 | 1.01 (0.93 - 1.1) | |  |  |
| cg00576014 | SDHC | rs143852380 | 0.8517702 | 0.984053173 | 0.8434598 | 1.01 (0.94 - 1.07) | |  |  |
| cg17084863 | UAP1 | rs41271987 | 0.821387 | 0.978158854 | 0.795461 | 1.01 (0.91 - 1.12) | |  |  |
| cg15978832 | UAP1 | rs1473000 | 0.8723806 | 0.986724534 | 0.7891764 | 1.01 (0.91 - 1.12) | |  |  |
| cg14252661 | HSD17B7 | rs1704739 | 0.1818054 | 0.783081015 | 0.8216599 | 1.07 (0.97 - 1.17) | |  |  |
| cg13901501 | RXRG | rs3753898 | 0.8928114 | 0.98930952 | 0.009887017 | 0.99 (0.88 - 1.11) | |  |  |
| cg12404281 | RXRG | rs6671584 | 0.4109463 | 0.890285147 | 0.1126145 | 0.98 (0.92 - 1.03) | |  |  |
| cg17514495 | RXRG | rs285429 | 0.8015338 | 0.97466331 | 0.0850998 | 1.01 (0.91 - 1.13) | |  |  |
| cg23051879 | ALDH9A1 | rs4646882 | 0.6952776 | 0.957247838 | 0.6143085 | 0.99 (0.95 - 1.04) | |  |  |
| cg02275294 | SOAT1 | rs2050450 | 0.3717431 | 0.878925154 | 0.9329366 | 0.96 (0.87 - 1.05) | |  |  |
| cg02081976 | SOAT1 | rs12138973 | 0.3719793 | 0.879061497 | 0.8768272 | 0.96 (0.87 - 1.05) | |  |  |
| cg04297152 | SOAT1 | rs72713497 | 0.6104734 | 0.940558433 | 0.4034731 | 0.99 (0.94 - 1.04) | |  |  |
| cg27230496 | SOAT1 | rs12568258 | 0.5962918 | 0.936631329 | 0.3475253 | 0.98 (0.89 - 1.07) | |  |  |
| cg03312984 | SOAT1 | rs4652409 | 0.371806 | 0.878950755 | 0.9723557 | 1.06 (0.94 - 1.19) | |  |  |
| cg09062138 | ACBD6 | rs72714859 | 0.8365584 | 0.980710053 | 0.03275136 | 1.01 (0.89 - 1.15) | |  |  |
| cg16358350 | ACBD6 | rs113104884 | 0.2763731 | 0.846368772 | 0.07314996 | 1.03 (0.97 - 1.1) | |  |  |
| cg06537131 | GLUL | rs76260440 | 0.370877 | 0.878507405 | 0.8378401 | 0.96 (0.87 - 1.05) | |  |  |
| cg07919760 | GLUL | rs28515637 | 0.9920267 | 0.998574368 | 0.2117025 | 1 (0.98 - 1.02) | |  |  |
| cg08104845 | GLUL | rs12081987 | 0.1605171 | 0.763858576 | 0.3381589 | 1.09 (0.97 - 1.22) | |  |  |
| cg27525037 | GLUL | rs4652704 | 0.2776755 | 0.847543337 | 0.03759541 | 1.03 (0.97 - 1.1) | |  |  |
| cg09470059 | GLUL | rs1925829 | 0.3690631 | 0.878063151 | 0.4733098 | 0.94 (0.83 - 1.07) | |  |  |
| cg17283022 | GLUL | rs3895340 | 0.1284414 | 0.733425536 | 0.09961603 | 1.02 (1 - 1.04) | |  |  |
| cg15114328 | GLUL | rs3895340 | 0.134784 | 0.738233428 | 0.05637462 | 1.1 (0.97 - 1.23) | |  |  |
| cg00383081 | GLUL | rs4652700 | 0.1461241 | 0.75007966 | 0.1580052 | 1.04 (0.99 - 1.09) | |  |  |
| cg10521480 | NPL | rs680721 | 0.512985 | 0.91691468 | 0.5463435 | 1.04 (0.93 - 1.15) | |  |  |
| cg09766355 | NPL | rs12137908 | 0.7788405 | 0.97006492 | 0.9903745 | 1 (0.98 - 1.01) | |  |  |
| cg19767650 | RGL1 | rs75043422 | 0.8713635 | 0.986553953 | 0.7922764 | 0.99 (0.93 - 1.07) | |  |  |
| cg11519238 | RGL1 | rs76799454 | 0.1562791 | 0.759176569 | 0.870869 | 0.93 (0.84 - 1.03) | |  |  |
| cg01850505 | RGL1 | rs16861532 | 0.3186039 | 0.861678502 | 0.9398409 | 1.07 (0.94 - 1.23) | |  |  |
| cg25147026 | PTGS2 | rs2206594 | 0.0869097 | 0.690289723 | 0.134596 | 1.07 (0.99 - 1.16) | |  |  |
| cg15898116 | PTGS2 | rs6666199 | 0.2712749 | 0.844609216 | 0.7220748 | 0.92 (0.78 - 1.07) | |  |  |
| cg18342183 | PLA2G4A | rs78864151 | 0.9618287 | 0.996245208 | 0.7475 | 1 (0.97 - 1.03) | |  |  |
| cg04929165 | PLA2G4A | rs7535459 | 0.2211731 | 0.816043259 | 0.3307316 | 0.93 (0.83 - 1.04) | |  |  |
| cg04566392 | ADIPOR1 | rs10920534 | 0.06931646 | 0.662680766 | 0.1929394 | 1.04 (1 - 1.08) | |  |  |
| cg05816157 | CYB5R1 | rs10920537 | 0.112544 | 0.715015281 | 0.3059919 | 0.95 (0.9 - 1.01) | |  |  |
| cg20133313 | CYB5R1 | rs10920534 | 0.07142412 | 0.666413058 | 0.6791715 | 0.95 (0.89 - 1) | |  |  |
| cg27169858 | CYB5R1 | rs2001831 | 0.805923 | 0.9751349 | 0.06488731 | 1.01 (0.93 - 1.1) | |  |  |
| cg08925398 | CYB5R1 | rs10920537 | 0.1118814 | 0.7137217 | 0.09377316 | 0.96 (0.91 - 1.01) | |  |  |
| cg18275051 | CYB5R1 | rs7517286 | 0.0931365 | 0.699508113 | 0.145823 | 0.95 (0.9 - 1.01) | |  |  |
| cg18811731 | ADORA1 | rs2270541 | 0.5501203 | 0.926268518 | 0.3119895 | 1.02 (0.95 - 1.09) | |  |  |
| cg16731083 | ADORA1 | rs903366 | 0.2858342 | 0.851128133 | 0.1775279 | 1.03 (0.97 - 1.1) | |  |  |
| cg01133446 | ADORA1 | rs2494296 | 0.3988599 | 0.887037757 | 0.8712801 | 1.05 (0.94 - 1.16) | |  |  |
| cg20142535 | ADORA1 | rs4245712 | 0.3083198 | 0.858035676 | 0.2523794 | 1.06 (0.94 - 1.2) | |  |  |
| cg08644365 | ADORA1 | rs1845466 | 0.8726713 | 0.986724534 | 0.557883 | 0.99 (0.9 - 1.1) | |  |  |
| cg21264521 | CHIT1 | rs2244783 | 0.4571239 | 0.903711216 | 0.8407506 | 0.96 (0.86 - 1.07) | |  |  |
| cg15209419 | CHIT1 | rs75817730 | 0.3304165 | 0.865236203 | 0.9618982 | 0.96 (0.87 - 1.05) | |  |  |
| cg17725472 | CHIT1 | rs7555556 | 0.2407298 | 0.827367802 | 0.08387613 | 0.97 (0.92 - 1.02) | |  |  |
| cg07972572 | CHIT1 | rs10920589 | 0.5962995 | 0.936631329 | 0.9300729 | 1.01 (0.97 - 1.06) | |  |  |
| cg17220161 | CHIT1 | rs2252183 | 0.9397742 | 0.994664173 | 0.7845719 | 1 (0.96 - 1.04) | |  |  |
| cg03890167 | CHIT1 | rs2494274 | 0.9046944 | 0.990758602 | 0.7704304 | 1 (0.96 - 1.04) | |  |  |
| cg06545166 | ETNK2 | rs72749729 | 0.3076711 | 0.857937647 | 0.1186603 | 0.99 (0.96 - 1.01) | |  |  |
| cg21535580 | ETNK2 | rs6676458 | 0.6367795 | 0.94495427 | 0.05550242 | 1.01 (0.96 - 1.07) | |  |  |
| cg00103329 | ETNK2 | rs56006042 | 0.6527498 | 0.947185602 | 0.05846956 | 1.02 (0.95 - 1.08) | |  |  |
| cg01566404 | ETNK2 | rs6676458 | 0.6369512 | 0.94495427 | 0.08285569 | 1.02 (0.95 - 1.09) | |  |  |
| cg13674411 | PLEKHA6 | rs4072613 | 0.8110644 | 0.976033217 | 0.726127 | 1.01 (0.92 - 1.11) | |  |  |
| cg10528484 | PLEKHA6 | rs4584453 | 0.7877176 | 0.972251328 | 0.2451707 | 1 (0.96 - 1.03) | |  |  |
| cg09850925 | PLEKHA6 | rs4287237 | 0.5338085 | 0.922711105 | 0.2717741 | 0.99 (0.94 - 1.03) | |  |  |
| cg26787863 | PLEKHA6 | rs7539690 | 0.5871812 | 0.935199895 | 0.4724628 | 0.99 (0.94 - 1.04) | |  |  |
| cg18222590 | PLEKHA6 | rs4362039 | 0.3961461 | 0.886947515 | 0.7359449 | 0.97 (0.92 - 1.04) | |  |  |
| cg16029875 | PLEKHA6 | rs11803361 | 0.409058 | 0.889888247 | 0.9219339 | 0.96 (0.86 - 1.06) | |  |  |
| cg20292636 | PLEKHA6 | rs7513240 | 0.2212226 | 0.816043259 | 0.7905363 | 0.96 (0.9 - 1.03) | |  |  |
| cg21581873 | PLEKHA6 | rs1398152 | 0.4131392 | 0.891061298 | 0.9431745 | 1.06 (0.93 - 1.2) | |  |  |
| cg22627800 | PLEKHA6 | rs11803361 | 0.4088819 | 0.889808154 | 0.9515702 | 0.96 (0.86 - 1.06) | |  |  |
| cg27047255 | PIK3C2B | rs3014637 | 0.4785114 | 0.908977432 | 0.0688133 | 1.03 (0.96 - 1.1) | |  |  |
| cg21195376 | PIK3C2B | rs10900592 | 0.09341529 | 0.699732429 | 0.4419405 | 1.05 (0.99 - 1.1) | |  |  |
| cg04885666 | PIK3C2B | rs16853822 | 0.09834124 | 0.704163073 | 0.4976669 | 1.09 (0.98 - 1.21) | |  |  |
| cg01064725 | PIK3C2B | rs1398148 | 0.07804463 | 0.674602752 | 0.6096422 | 1.05 (0.99 - 1.11) | |  |  |
| cg17271974 | PIK3C2B | rs2926536 | 0.2156924 | 0.811540652 | 0.4399816 | 1.07 (0.96 - 1.18) | |  |  |
| cg10118093 | PIK3C2B | rs4951075 | 0.08715247 | 0.69099735 | 0.7830281 | 0.89 (0.79 - 1.02) | |  |  |
| cg20240347 | PIK3C2B | rs16853865 | 0.0910534 | 0.697767744 | 0.3363992 | 1.03 (1 - 1.06) | |  |  |
| cg15559938 | MAPKAPK2 | rs11119297 | 0.3962579 | 0.886965404 | 0.463489 | 0.95 (0.84 - 1.07) | |  |  |
| cg25741609 | MAPKAPK2 | rs7547594 | 0.3034184 | 0.857248999 | 0.1952536 | 0.99 (0.96 - 1.01) | |  |  |
| cg23646375 | G0S2 | rs2236900 | 0.774663 | 0.969046051 | 0.1187568 | 0.99 (0.91 - 1.07) | |  |  |
| cg08158408 | G0S2 | rs11576775 | 0.08503773 | 0.68722913 | 0.6994528 | 0.89 (0.79 - 1.02) | |  |  |
| cg09168728 | LPGAT1 | rs149667249 | 0.1198975 | 0.724308044 | 0.09451907 | 1.09 (0.98 - 1.21) | |  |  |
| cg13064658 | LPGAT1 | rs144948621 | 0.6783219 | 0.953486949 |  | 0.94 (0.71 - 1.25) | |  |  |
| cg07356549 | LPGAT1 | rs148687301 | 0.0984636 | 0.704163073 | 0.06076986 | 1.1 (0.98 - 1.24) | |  |  |
| cg02772509 | LPGAT1 | rs77463755 | 0.09542611 | 0.70060714 | 0.6558464 | 0.96 (0.92 - 1.01) | |  |  |
| cg17239057 | DEGS1 | rs9662363 | 0.7743602 | 0.969032685 | 0.2934136 | 1.01 (0.93 - 1.11) | |  |  |
| cg01553584 | DEGS1 | rs4290029 | 0.7195034 | 0.96106857 | 0.008110771 | 0.98 (0.9 - 1.08) | |  |  |
| cg26914392 | LBR | rs116289082 | 0.4729454 | 0.908168812 | 0.1279712 | 0.99 (0.97 - 1.02) | |  |  |
| cg16516405 | LBR | rs76374387 | 0.9740064 | 0.997273118 | 0.002491897 | 1 (0.97 - 1.03) | |  |  |
| cg23038277 | ITPKB | rs77703094 | 0.4551517 | 0.903382309 | 0.7956315 | 0.97 (0.9 - 1.05) | |  |  |
| cg22021597 | ITPKB | rs150275852 | 0.05139146 | 0.628411197 | 0.3259253 | 0.9 (0.81 - 1) |  |  |  |
| cg05773194 | ITPKB | rs114786355 | 0.09435262 | 0.700545739 | 0.8510782 | 1.05 (0.99 - 1.11) | |  |  |
| cg12136950 | ITPKB | rs3820640 | 0.1329483 | 0.736998865 | 0.4769249 | 1.05 (0.99 - 1.11) | |  |  |
| cg19322969 | ITPKB | rs12094617 | 0.3004608 | 0.857248999 | 0.7074497 | 1.04 (0.97 - 1.11) | |  |  |
| cg13432682 | ITPKB | rs3768378 | 0.4045742 | 0.888627194 | 0.3901727 | 0.97 (0.9 - 1.05) | |  |  |
| cg13500195 | ITPKB | rs10495265 | 0.6466942 | 0.94603711 | 0.7345238 | 1.03 (0.9 - 1.19) | |  |  |
| cg15834037 | ITPKB | rs9662124 | 0.7434223 | 0.965477572 | 0.4034464 | 1.01 (0.95 - 1.08) | |  |  |
| cg04213163 | ITPKB | rs1289274 | 0.6593137 | 0.948545432 | 0.03227281 | 1.01 (0.97 - 1.05) | |  |  |
| cg21422623 | ITPKB | rs3768411 | 0.07058754 | 0.664276538 | 0.2486379 | 1.08 (0.99 - 1.17) | |  |  |
| cg05262829 | ITPKB | rs708775 | 0.6672041 | 0.950857097 | 0.0731977 | 0.99 (0.97 - 1.02) | |  |  |
| cg23717186 | ITPKB | rs1289273 | 0.4119339 | 0.890547592 | 0.2196562 | 1.05 (0.93 - 1.18) | |  |  |
| cg05394663 | ARF1 | rs114079133 | 0.9078062 | 0.990981162 | 0.8788629 | 1 (0.93 - 1.09) | |  |  |
| cg08354527 | RAB4A | rs9283408 | 0.5895823 | 0.93585134 | 0.8590748 | 0.99 (0.97 - 1.02) | |  |  |
| cg02157002 | RAB4A | rs750556 | 0.3811692 | 0.881767111 | 0.332979 | 1.05 (0.94 - 1.18) | |  |  |
| cg22945666 | RAB4A | rs9659063 | 0.8953651 | 0.989845138 | 0.6238913 | 1.01 (0.88 - 1.16) | |  |  |
| cg25023165 | RAB4A | rs3923210 | 0.4099197 | 0.890142955 | 0.3675672 | 1.05 (0.94 - 1.17) | |  |  |
| cg02773275 | RAB4A | rs11583419 | 0.6011048 | 0.937894714 | 0.4593034 | 1.01 (0.98 - 1.03) | |  |  |
| cg08946995 | RAB4A | rs11583419 | 0.601069 | 0.937894714 | 0.5471273 | 1.01 (0.99 - 1.02) | |  |  |
| cg05718485 | RAB4A | rs12565688 | 0.8526186 | 0.984137145 | 0.4118272 | 0.99 (0.89 - 1.1) | |  |  |
| cg03985415 | RAB4A | rs6692974 | 0.4309666 | 0.896260257 | 0.5448446 | 1.01 (0.98 - 1.05) | |  |  |
| cg10442549 | AGT | rs2478534 | 0.8871956 | 0.987692914 | 0.7512542 | 1 (0.96 - 1.04) | |  |  |
| cg22010140 | AGT | rs6683321 | 0.8133934 | 0.976406452 | 0.8394324 | 0.99 (0.9 - 1.09) | |  |  |
| cg27046460 | AGT | rs3889728 | 0.4850199 | 0.910710331 | 0.5398035 | 0.96 (0.85 - 1.08) | |  |  |
| cg07502417 | AGT | rs7549179 | 0.6253695 | 0.943223573 | 0.3975422 | 1.01 (0.98 - 1.03) | |  |  |
| cg01083716 | AGT | rs5050 | 0.8272905 | 0.979185963 | 0.917649 | 1 (0.97 - 1.04) | |  |  |
| cg24474852 | AGT | rs5050 | 0.8272864 | 0.979185963 | 0.8177557 | 1 (0.98 - 1.03) | |  |  |
| cg19125606 | AGT | rs5051 | 0.8611379 | 0.985444341 | 0.9159182 | 1 (0.96 - 1.05) | |  |  |
| cg27306913 | ARV1 | rs7533671 | 0.342388 | 0.869637652 | 0.8340673 | 0.95 (0.84 - 1.06) | |  |  |
| cg10324224 | ARV1 | rs10864645 | 0.243967 | 0.829526815 | 0.8038351 | 0.98 (0.96 - 1.01) | |  |  |
| cg12741407 | ARV1 | rs35610408 | 0.6786372 | 0.953528995 | 0.8787644 | 1.02 (0.93 - 1.13) | |  |  |
| cg04411337 | ARV1 | rs16853141 | 0.1906399 | 0.791482716 | 0.6331864 | 1.03 (0.98 - 1.08) | |  |  |
| cg04096525 | GNPAT | rs114519089 | 0.1790715 | 0.779294644 | 0.1662957 | 0.99 (0.98 - 1) | |  |  |
| cg24865132 | GNPAT | rs4658911 | 0.8271165 | 0.979185963 | 0.8287505 | 0.99 (0.9 - 1.09) | |  |  |
| cg04221461 | AKT3 | rs1379700 | 0.99504 | 0.998980308 | 0.04315847 | 1 (0.93 - 1.08) | |  |  |
| cg07343703 | AKT3 | rs4430311 | 0.5931988 | 0.93585134 | 0.04214231 | 0.99 (0.96 - 1.02) | |  |  |
| cg06699555 | MBOAT2 | rs6729107 | 0.5115711 | 0.91691468 | 0.9075617 | 0.97 (0.89 - 1.06) | |  |  |
| cg25811083 | MBOAT2 | rs328631 | 0.6924637 | 0.95653054 | 0.9126099 | 1.01 (0.97 - 1.05) | |  |  |
| cg04575202 | MBOAT2 | rs907160 | 0.2582281 | 0.836471869 | 0.6743792 | 1.07 (0.95 - 1.2) | |  |  |
| cg01570972 | GRHL1 | rs2011523 | 0.5612212 | 0.930146233 | 0.6159935 | 1.02 (0.96 - 1.08) | |  |  |
| cg14124917 | GRHL1 | rs73913927 | 0.2442895 | 0.829869324 | 0.1455586 | 1.06 (0.96 - 1.16) | |  |  |
| cg18761223 | GRHL1 | rs2163336 | 0.05859376 | 0.641528791 | 0.3024328 | 1.12 (1 - 1.26) | |  |  |
| cg15770238 | LPIN1 | rs10929765 | 0.1111475 | 0.713163853 | 0.2441833 | 1.03 (0.99 - 1.07) | |  |  |
| cg06564827 | LPIN1 | rs10929765 | 0.1131424 | 0.715859448 | 0.266025 | 1.05 (0.99 - 1.11) | |  |  |
| cg06500134 | LPIN1 | rs10929765 | 0.1120851 | 0.713955843 | 0.2475251 | 1.04 (0.99 - 1.09) | |  |  |
| cg14420123 | LPIN1 | rs10929765 | 0.1233414 | 0.728697209 | 0.218577 | 1.1 (0.97 - 1.24) | |  |  |
| cg22156674 | LPIN1 | rs62116209 | 0.1207467 | 0.72536411 | 0.7220302 | 1.02 (1 - 1.04) | |  |  |
| cg08977816 | LPIN1 | rs11695074 | 0.7499251 | 0.96647031 | 0.1846941 | 1.01 (0.93 - 1.11) | |  |  |
| cg11774850 | LPIN1 | rs10191977 | 0.7034663 | 0.958680302 | 0.4707782 | 1.02 (0.92 - 1.14) | |  |  |
| cg17211562 | LPIN1 | rs62113309 | 0.3724761 | 0.879218269 | 0.5831971 | 1.04 (0.95 - 1.15) | |  |  |
| cg04436889 | LPIN1 | rs893342 | 0.7000742 | 0.957917087 | 0.6150687 | 1.02 (0.93 - 1.12) | |  |  |
| cg21579399 | LPIN1 | rs10207506 | 0.745744 | 0.965761902 | 0.758531 | 1.02 (0.91 - 1.14) | |  |  |
| cg15978565 | LPIN1 | rs10169802 | 0.8982194 | 0.990106178 | 0.3031561 | 1.01 (0.9 - 1.12) | |  |  |
| cg11672879 | LPIN1 | rs11538448 | 0.661359 | 0.949459416 | 0.4418986 | 0.98 (0.92 - 1.06) | |  |  |
| cg20460514 | LPIN1 | rs1469952 | 0.5564674 | 0.928636514 | 0.5564185 | 1.01 (0.98 - 1.03) | |  |  |
| cg10142874 | LPIN1 | rs10169802 | 0.8982167 | 0.990106178 | 0.6255241 | 0.99 (0.9 - 1.1) | |  |  |
| cg25654774 | LPIN1 | rs3795974 | 0.1376223 | 0.739635827 | 0.2523675 | 1.08 (0.97 - 1.21) | |  |  |
| cg25035485 | APOB | rs515135 | 0.4130319 | 0.891061298 | 0.4884701 | 0.98 (0.95 - 1.02) | |  |  |
| cg05337441 | APOB | rs515135 | 0.4131642 | 0.891061298 | 0.4467059 | 0.98 (0.94 - 1.03) | |  |  |
| cg00673290 | APOB | rs1367117 | 0.08466199 | 0.686545366 | 0.2245264 | 0.96 (0.91 - 1.01) | |  |  |
| cg16723488 | APOB | rs515135 | 0.4131378 | 0.891061298 | 0.4172342 | 0.98 (0.94 - 1.02) | |  |  |
| cg16306978 | APOB | rs515135 | 0.4129453 | 0.891061298 | 0.3927084 | 0.99 (0.95 - 1.02) | |  |  |
| cg24309555 | APOB | rs515135 | 0.4130764 | 0.891061298 | 0.4348786 | 0.98 (0.94 - 1.02) | |  |  |
| cg03350299 | APOB | rs515135 | 0.4131099 | 0.891061298 | 0.4269706 | 0.98 (0.94 - 1.02) | |  |  |
| cg25071744 | APOB | rs515135 | 0.4130196 | 0.891061298 | 0.4352851 | 0.98 (0.95 - 1.02) | |  |  |
| cg25123895 | APOB | rs62122516 | 0.748922 | 0.96647031 | 0.5463093 | 0.99 (0.95 - 1.03) | |  |  |
| cg07636176 | APOB | rs62122515 | 0.7615352 | 0.966957226 | 0.5919262 | 0.99 (0.96 - 1.03) | |  |  |
| cg15246511 | APOB | rs1367113 | 0.7718136 | 0.96834199 | 0.4748715 | 0.99 (0.95 - 1.04) | |  |  |
| cg26112457 | APOB | rs1367117 | 0.08652802 | 0.688860822 | 0.04626698 | 0.94 (0.88 - 1.01) | |  |  |
| cg24935556 | APOB | rs668948 | 0.4291477 | 0.895626154 | 0.4952169 | 1.04 (0.94 - 1.14) | |  |  |
| cg07363185 | APOB | rs11687710 | 0.5317604 | 0.921986842 | 0.350775 | 0.96 (0.85 - 1.09) | |  |  |
| cg09861922 | APOB | rs35239705 | 0.1131168 | 0.715794296 | 0.2866912 | 0.96 (0.91 - 1.01) | |  |  |
| cg04335293 | NCOA1 | rs1550383 | 0.0903409 | 0.696003613 | 0.6803167 | 1.09 (0.99 - 1.21) | |  |  |
| cg15138109 | NCOA1 | rs4665722 | 0.1935173 | 0.794728981 | 0.8746437 | 1.07 (0.97 - 1.19) | |  |  |
| cg03879180 | NCOA1 | rs1822300 | 0.6121652 | 0.94084644 | 0.5355037 | 1.01 (0.97 - 1.05) | |  |  |
| cg11380327 | NCOA1 | rs13002937 | 0.3716021 | 0.878863285 | 0.5694043 | 0.97 (0.92 - 1.03) | |  |  |
| cg27107076 | ADCY3 | rs55701159 | 0.9022634 | 0.990758602 | 0.1739299 | 1 (0.95 - 1.04) | |  |  |
| cg02353427 | ADCY3 | rs56003423 | 0.03837874 | 0.592183389 | 0.008399716 | 0.95 (0.9 - 1) |  |  |  |
| cg09505516 | ADCY3 | rs10164842 | 0.000448757 | 0.144918744 | 0.0475701 | 0.95 (0.92 - 0.98) | |  |  |
| cg08266286 | ADCY3 | rs10207642 | 0.001119399 | 0.215034939 | 0.04651034 | 0.79 (0.69 - 0.91) | |  |  |
| cg17644208 | ADCY3 | rs10196998 | 0.000889019 | 0.189912482 | 0.03227562 | 0.89 (0.83 - 0.95) | |  |  |
| cg20442994 | ADCY3 | rs6719538 | 0.02442087 | 0.533291604 | 0.00443253 | 0.95 (0.91 - 0.99) | |  |  |
| cg08526959 | ADCY3 | rs6719538 | 0.02650261 | 0.542902762 | 0.001629834 | 1.09 (1.01 - 1.18) | |  |  |
| cg01400712 | POMC | rs2099598 | 0.0055979 | 0.35337027 | 0.04924793 | 1.07 (1.02 - 1.12) | |  |  |
| cg20473374 | POMC | rs75781902 | 0.3368578 | 0.867614935 | 0.6672463 | 0.96 (0.87 - 1.05) | |  |  |
| cg25816739 | POMC | rs112547779 | 0.5200977 | 0.918578414 | 0.5402524 | 0.98 (0.94 - 1.03) | |  |  |
| cg07074666 | POMC | rs112547779 | 0.5207785 | 0.918602233 | 0.8289528 | 0.98 (0.91 - 1.05) | |  |  |
| cg22444445 | POMC | rs112547779 | 0.5196932 | 0.918575396 | 0.4800952 | 0.99 (0.96 - 1.02) | |  |  |
| cg15391491 | POMC | rs6545951 | 0.8363228 | 0.980682266 | 0.177756 | 0.99 (0.93 - 1.06) | |  |  |
| cg23809645 | POMC | rs3754861 | 0.9854458 | 0.997836182 | 0.06190544 | 1 (0.96 - 1.04) | |  |  |
| cg10045137 | POMC | rs6545951 | 0.8362623 | 0.980682266 | 0.1514516 | 1 (0.97 - 1.02) | |  |  |
| cg02716646 | POMC | rs6751851 | 0.8480551 | 0.98312626 | 0.08478466 | 0.99 (0.93 - 1.06) | |  |  |
| cg06846259 | POMC | rs6713396 | 0.3904412 | 0.886057526 | 0.6443393 | 0.97 (0.92 - 1.03) | |  |  |
| cg20807790 | POMC | rs3754861 | 0.9854459 | 0.997836182 | 0.2710508 | 1 (0.93 - 1.07) | |  |  |
| cg02757179 | POMC | rs17039879 | 0.393587 | 0.886657389 | 0.6234578 | 0.97 (0.92 - 1.03) | |  |  |
| cg02642979 | POMC | rs183720801 | 0.3368103 | 0.867614935 | 0.6584825 | 0.96 (0.89 - 1.04) | |  |  |
| cg13349472 | POMC | rs113389176 | 0.4229221 | 0.894108795 | 0.7745958 | 0.97 (0.89 - 1.05) | |  |  |
| cg13430552 | POMC | rs183720801 | 0.3374875 | 0.867614935 | 0.5678395 | 0.96 (0.89 - 1.04) | |  |  |
| cg01188578 | HADHA | rs12185726 | 0.6752181 | 0.952559899 | 0.6470205 | 1 (0.98 - 1.01) | |  |  |
| cg08067268 | HADHA | rs2033317 | 0.6480779 | 0.946222335 | 0.2065822 | 0.99 (0.96 - 1.03) | |  |  |
| cg00747065 | HADHB | rs11126405 | 0.6566738 | 0.947936792 | 0.03104528 | 1.02 (0.95 - 1.09) | |  |  |
| cg26119090 | HADHB | rs4665841 | 0.6510593 | 0.946723877 | 0.07004821 | 0.99 (0.94 - 1.04) | |  |  |
| cg15170715 | KHK | rs55836910 | 0.3234553 | 0.862596 | 0.7501084 | 0.94 (0.82 - 1.07) | |  |  |
| cg02467646 | MPV17 | rs146818183 | 0.8776088 | 0.986942168 | 0.2571933 | 0.97 (0.65 - 1.44) | |  |  |
| cg06061442 | PLB1 | rs13017562 | 0.4886309 | 0.912075918 | 0.5904866 | 1.03 (0.95 - 1.11) | |  |  |
| cg22412747 | PLB1 | rs4665425 | 0.007451664 | 0.402360566 | 0.02112618 | 0.97 (0.95 - 0.99) | |  |  |
| cg21432789 | PLB1 | rs6729040 | 0.5368707 | 0.922827354 | 0.7871042 | 1.03 (0.94 - 1.12) | |  |  |
| cg06142740 | PPP1CB | rs7562170 | 0.2612436 | 0.838439006 | 0.2047813 | 1.04 (0.97 - 1.11) | |  |  |
| cg09522027 | PPP1CB | rs12475612 | 0.1267601 | 0.731699937 | 0.4888151 | 1.02 (0.99 - 1.05) | |  |  |
| cg12454169 | LCLAT1 | rs1723170 | 0.08572482 | 0.688259309 | 0.8931235 | 1.02 (1 - 1.04) | |  |  |
| cg15652532 | LCLAT1 | rs1723170 | 0.08566459 | 0.688259309 | 0.8804007 | 1.02 (1 - 1.03) | |  |  |
| cg17749961 | LCLAT1 | rs1723170 | 0.0856965 | 0.688259309 | 0.8755748 | 1.02 (1 - 1.04) | |  |  |
| cg03795903 | LCLAT1 | rs2602795 | 0.1899875 | 0.790469673 | 0.4199603 | 1.02 (0.99 - 1.06) | |  |  |
| cg07150166 | LCLAT1 | rs2593445 | 0.2281599 | 0.819564578 | 0.5037704 | 1.02 (0.99 - 1.05) | |  |  |
| cg04351272 | LCLAT1 | rs13404307 | 0.3608491 | 0.875455705 | 0.7205374 | 0.94 (0.83 - 1.07) | |  |  |
| cg12835981 | LCLAT1 | rs79522132 | 0.210787 | 0.807929423 | 0.7700951 | 1.06 (0.97 - 1.16) | |  |  |
| cg10995359 | LCLAT1 | rs2609961 | 0.2416011 | 0.828073497 | 0.7318305 | 1.06 (0.96 - 1.18) | |  |  |
| cg15175514 | LCLAT1 | rs2593445 | 0.2321901 | 0.821707896 | 0.1953855 | 1.05 (0.97 - 1.14) | |  |  |
| cg04768958 | LCLAT1 | rs829638 | 0.1041072 | 0.707175673 | 0.8368532 | 0.96 (0.91 - 1.01) | |  |  |
| cg10949345 | LCLAT1 | rs829682 | 0.9768464 | 0.997273118 | 0.05657208 | 1 (0.94 - 1.06) | |  |  |
| cg18948125 | SRD5A2 | rs11124272 | 0.1559571 | 0.759010138 | 0.2794724 | 1.09 (0.97 - 1.23) | |  |  |
| cg26638505 | SRD5A2 | rs2754530 | 0.1450177 | 0.749487025 | 0.2539148 | 1.08 (0.97 - 1.2) | |  |  |
| cg08894761 | SRD5A2 | rs600015 | 0.2756849 | 0.845796536 | 0.4377608 | 1.07 (0.95 - 1.2) | |  |  |
| cg22375559 | PRKD3 | rs11689186 | 0.3613871 | 0.875690193 | 0.1889675 | 1.07 (0.93 - 1.23) | |  |  |
| cg23399173 | PRKD3 | rs6726921 | 0.4492648 | 0.901903834 | 0.04365108 | 1.03 (0.95 - 1.13) | |  |  |
| cg26106370 | PRKD3 | rs4670687 | 0.407157 | 0.889499223 | 0.4365463 | 0.97 (0.89 - 1.05) | |  |  |
| cg02162897 | CYP1B1 | rs10178134 | 0.7953813 | 0.973267945 | 0.4956285 | 0.99 (0.93 - 1.06) | |  |  |
| cg20408276 | CYP1B1 | rs10178134 | 0.795356 | 0.973267945 | 0.6324077 | 0.99 (0.94 - 1.05) | |  |  |
| cg00565882 | CYP1B1 | rs73930005 | 0.2875989 | 0.851771376 | 0.9806051 | 0.98 (0.93 - 1.02) | |  |  |
| cg06264984 | CYP1B1 | rs73930005 | 0.2881858 | 0.851834806 | 0.9931258 | 0.97 (0.92 - 1.02) | |  |  |
| cg05062676 | CYP1B1 | rs162553 | 0.1219684 | 0.727193909 | 0.7083671 | 1.07 (0.98 - 1.16) | |  |  |
| cg23838231 | CYP1B1 | rs4646430 | 0.7514368 | 0.966538629 | 0.123516 | 1.01 (0.97 - 1.04) | |  |  |
| cg06202585 | CYP1B1 | rs151257 | 0.5506969 | 0.92637421 | 0.1841303 | 1.01 (0.97 - 1.06) | |  |  |
| cg07470341 | GALM | rs11896593 | 0.4114778 | 0.890397871 | 0.5987586 | 1.03 (0.96 - 1.1) | |  |  |
| cg19391498 | GALM | rs6707421 | 0.9803339 | 0.99749749 | 0.1459862 | 1 (0.96 - 1.04) | |  |  |
| cg05275752 | GALM | rs6736259 | 0.8857726 | 0.987501595 | 0.1448494 | 1 (0.96 - 1.05) | |  |  |
| cg01546378 | GALM | rs6707421 | 0.9803339 | 0.99749749 | 0.1549521 | 1 (0.95 - 1.05) | |  |  |
| cg08308459 | GALM | rs6736259 | 0.8857766 | 0.987501595 | 0.1044941 | 1 (0.95 - 1.07) | |  |  |
| cg05604112 | GALM | rs7588762 | 0.3788232 | 0.880717157 | 0.1209903 | 1.03 (0.97 - 1.09) | |  |  |
| cg23643435 | GALM | rs7588762 | 0.3786783 | 0.880717157 | 0.128877 | 1.02 (0.97 - 1.08) | |  |  |
| cg00359181 | GALM | rs6761563 | 0.3917093 | 0.886195129 | 0.1503766 | 1.02 (0.98 - 1.06) | |  |  |
| cg20799917 | GALM | rs4670263 | 0.3866895 | 0.883860234 | 0.3261538 | 1.04 (0.96 - 1.12) | |  |  |
| cg02502145 | SOS1 | rs79756054 | 0.3401144 | 0.868258695 | 0.1337116 | 0.99 (0.98 - 1.01) | |  |  |
| cg21949194 | SOS1 | rs11124660 | 0.4090116 | 0.889888247 | 0.4845464 | 0.96 (0.86 - 1.06) | |  |  |
| cg15009328 | ABCG5 | rs3923912 | 0.3792219 | 0.880763479 | 0.9534775 | 1.05 (0.94 - 1.17) | |  |  |
| cg21783355 | ABCG8 | rs3806471 | 0.1615228 | 0.764387082 | 0.858362 | 0.96 (0.92 - 1.01) | |  |  |
| cg26706238 | ABCG8 | rs3806470 | 0.1047208 | 0.707659656 | 0.9689062 | 0.94 (0.87 - 1.01) | |  |  |
| cg01002570 | PRKCE | rs477947 | 0.3086069 | 0.858049535 | 0.9874818 | 0.95 (0.86 - 1.05) | |  |  |
| cg05208381 | PRKCE | rs475247 | 0.3040886 | 0.857248999 | 0.6798428 | 0.98 (0.94 - 1.02) | |  |  |
| cg02544394 | PRKCE | rs938662 | 0.8474109 | 0.983082241 | 0.5963171 | 0.99 (0.94 - 1.06) | |  |  |
| cg01243950 | PRKCE | rs12185636 | 0.7611801 | 0.966957226 | 0.9177665 | 1.01 (0.95 - 1.07) | |  |  |
| cg02541582 | UGP2 | rs4671073 | 0.1773031 | 0.777394452 | 0.4217005 | 1.07 (0.97 - 1.18) | |  |  |
| cg19931529 | UGP2 | rs6731508 | 0.1837452 | 0.784946519 | 0.3599643 | 1.08 (0.96 - 1.21) | |  |  |
| cg20651995 | GFPT1 | rs4077916 | 0.3021131 | 0.857248999 | 0.1795284 | 1.04 (0.96 - 1.12) | |  |  |
| cg02540026 | GFPT1 | rs62134416 | 0.05876314 | 0.641865265 | 0.1741454 | 0.91 (0.83 - 1) | |  |  |
| cg13393601 | GFPT1 | rs6732123 | 0.05767064 | 0.640493749 | 0.9043035 | 1.12 (1 - 1.25) | |  |  |
| cg25195673 | GFPT1 | rs6735037 | 0.1872314 | 0.787837431 | 0.2269014 | 1.03 (0.98 - 1.09) | |  |  |
| cg01396872 | NAGK | rs2287331 | 0.9897553 | 0.998215646 | 0.3182217 | 1 (0.9 - 1.11) |  |  |  |
| cg18991240 | NAGK | rs13003421 | 0.3532392 | 0.872484783 | 0.09158483 | 0.97 (0.91 - 1.04) | |  |  |
| cg04659154 | ZNF638 | rs72622627 | 0.4012483 | 0.887264687 | 0.3976785 | 0.96 (0.87 - 1.06) | |  |  |
| cg07393255 | ZNF638 | rs59596777 | 0.3856884 | 0.883329892 | 0.3996743 | 0.96 (0.86 - 1.06) | |  |  |
| cg16368750 | ZNF638 | rs59596777 | 0.3858734 | 0.883329892 | 0.2365065 | 0.95 (0.86 - 1.06) | |  |  |
| cg09012544 | ZNF638 | rs6726206 | 0.2767045 | 0.846602925 | 0.424011 | 0.94 (0.84 - 1.05) | |  |  |
| cg01579289 | ZNF638 | rs59596777 | 0.3881186 | 0.88507389 | 0.9190284 | 0.94 (0.82 - 1.08) | |  |  |
| cg23045594 | ZNF638 | rs72622627 | 0.400943 | 0.887263162 | 0.4098356 | 0.96 (0.88 - 1.05) | |  |  |
| cg17332897 | ZNF638 | rs72622627 | 0.3999595 | 0.887037757 | 0.405103 | 0.97 (0.9 - 1.04) | |  |  |
| cg00167655 | ZNF638 | rs4852256 | 0.6359253 | 0.94473796 | 0.3714969 | 0.99 (0.95 - 1.03) | |  |  |
| cg02831290 | HK2 | rs624572 | 0.6291789 | 0.944409586 | 0.2283173 | 0.97 (0.88 - 1.08) | |  |  |
| cg08308032 | HK2 | rs2047631 | 0.301061 | 0.857248999 | 0.2442337 | 0.98 (0.94 - 1.02) | |  |  |
| cg13000080 | HK2 | rs4241262 | 0.9938292 | 0.998800437 | 0.08204999 | 1 (0.98 - 1.02) | |  |  |
| cg15294778 | HK2 | rs581720 | 0.3894404 | 0.885708762 | 0.106792 | 0.97 (0.91 - 1.04) | |  |  |
| cg22276800 | HK2 | rs618832 | 0.9609325 | 0.996245208 | 0.07462981 | 1 (0.98 - 1.02) | |  |  |
| cg08729839 | HK2 | rs678350 | 0.3062801 | 0.857248999 | 0.05299111 | 0.95 (0.86 - 1.05) | |  |  |
| cg05595692 | HK2 | rs640944 | 0.3427827 | 0.869689834 | 0.09303205 | 0.95 (0.86 - 1.05) | |  |  |
| cg23157190 | HK2 | rs13017332 | 0.2671397 | 0.841470631 | 0.7038428 | 0.94 (0.85 - 1.05) | |  |  |
| cg10597191 | HK2 | rs3771791 | 0.1439713 | 0.747645443 | 0.1323406 | 0.96 (0.92 - 1.01) | |  |  |
| cg11672772 | HK2 | rs3771783 | 0.0955858 | 0.70085765 | 0.2230642 | 1.03 (1 - 1.06) | |  |  |
| cg12077754 | HK2 | rs11694331 | 0.2749778 | 0.845420364 | 0.3457237 | 1.02 (0.98 - 1.06) | |  |  |
| cg12158889 | SUCLG1 | rs6719880 | 0.3593219 | 0.874850098 | 0.4575549 | 1.06 (0.94 - 1.19) | |  |  |
| cg11765312 | SUCLG1 | rs7581224 | 0.8721621 | 0.98672251 | 0.2065991 | 0.99 (0.91 - 1.08) | |  |  |
| cg24933157 | FABP1 | rs12470985 | 0.954863 | 0.996245208 | 0.5921189 | 1 (0.91 - 1.1) |  |  |  |
| cg01494896 | RPIA | rs3926531 | 0.1438853 | 0.747487649 | 0.2775788 | 1.09 (0.97 - 1.21) | |  |  |
| cg06529439 | RPIA | rs73952337 | 0.2398627 | 0.827235266 | 0.5583492 | 0.96 (0.9 - 1.03) | |  |  |
| cg15609308 | RPIA | rs4972061 | 0.176893 | 0.776964732 | 0.8422968 | 0.96 (0.91 - 1.02) | |  |  |
| cg23605439 | STARD7 | rs150471479 | 0.0691703 | 0.661953703 | 0.304728 | 1.18 (0.99 - 1.42) | |  |  |
| cg09305577 | STARD7 | rs180921462 | 0.07445353 | 0.670505988 | 0.08604424 | 1.15 (0.99 - 1.35) | |  |  |
| cg17206872 | INPP4A | rs72819957 | 0.1134099 | 0.716340758 | 0.7671341 | 0.93 (0.85 - 1.02) | |  |  |
| cg14918548 | NPAS2 | rs7592106 | 0.6749976 | 0.952544602 | 0.4433247 | 0.98 (0.88 - 1.08) | |  |  |
| cg03312117 | NPAS2 | rs7567256 | 0.9317622 | 0.993733866 | 0.2308181 | 1 (0.98 - 1.01) | |  |  |
| cg05471495 | NPAS2 | rs13026445 | 0.2383476 | 0.825721956 | 0.4223105 | 1.03 (0.98 - 1.07) | |  |  |
| cg10862960 | NPAS2 | rs11897738 | 0.9304076 | 0.993715086 | 0.52659 | 1 (0.92 - 1.08) | |  |  |
| cg00584683 | NPAS2 | rs6542992 | 0.906852 | 0.990922365 | 0.1844691 | 0.99 (0.9 - 1.1) | |  |  |
| cg21609584 | NPAS2 | rs12712084 | 0.7573229 | 0.966870715 | 0.721989 | 0.99 (0.94 - 1.05) | |  |  |
| cg25628433 | NPAS2 | rs71413895 | 0.8163565 | 0.976725472 | 0.4190609 | 1.01 (0.94 - 1.08) | |  |  |
| cg15159111 | NPAS2 | rs3768984 | 0.1390217 | 0.741736686 | 0.5346366 | 1.04 (0.99 - 1.09) | |  |  |
| cg02563156 | FHL2 | rs3087523 | 0.5253639 | 0.920715399 | 0.5675901 | 1.01 (0.98 - 1.03) | |  |  |
| cg06320277 | FHL2 | rs6749911 | 0.3428882 | 0.869689834 | 0.4033663 | 1.02 (0.98 - 1.06) | |  |  |
| cg19850931 | FHL2 | rs145587098 | 0.9479968 | 0.995743805 |  | 1 (0.91 - 1.11) | |  |  |
| cg02054792 | FHL2 | rs11896222 | 0.8321556 | 0.980052033 | 0.198209 | 0.99 (0.88 - 1.1) | |  |  |
| cg22454769 | FHL2 | rs12328750 | 0.7032915 | 0.958680302 | 0.8642987 | 1.02 (0.93 - 1.12) | |  |  |
| cg24079702 | FHL2 | rs12328750 | 0.7031522 | 0.958647569 | 0.9083431 | 1.02 (0.94 - 1.1) | |  |  |
| cg26344233 | FHL2 | rs13386004 | 0.6209206 | 0.942182278 | 0.8361903 | 1.03 (0.91 - 1.17) | |  |  |
| cg19025700 | FHL2 | rs76121528 | 0.5980756 | 0.93703285 | 0.9487594 | 1.02 (0.95 - 1.09) | |  |  |
| cg03136099 | FHL2 | rs11124031 | 0.3641746 | 0.876571505 | 0.3327093 | 1.02 (0.98 - 1.06) | |  |  |
| cg25332717 | FHL2 | rs7574639 | 0.4279414 | 0.895185268 | 0.2690561 | 0.97 (0.91 - 1.04) | |  |  |
| cg27223827 | FHL2 | rs116143750 | 0.6065148 | 0.939276947 | 0.8793049 | 1.01 (0.96 - 1.07) | |  |  |
| cg27616833 | FHL2 | rs145587098 | 0.9479964 | 0.995743805 |  | 1 (0.92 - 1.09) | |  |  |
| cg27138892 | FHL2 | rs1401210 | 0.3319185 | 0.865874575 | 0.9017374 | 1.04 (0.96 - 1.12) | |  |  |
| cg08182191 | UXS1 | rs7564049 | 0.8759989 | 0.986942168 | 0.7195634 | 1.01 (0.94 - 1.08) | |  |  |
| cg00295485 | UXS1 | rs11687791 | 0.2457457 | 0.830315778 | 0.9407052 | 1.05 (0.97 - 1.14) | |  |  |
| cg15341833 | UXS1 | rs114512400 | 0.5913172 | 0.93585134 |  | 1.03 (0.92 - 1.16) | |  |  |
| cg23362669 | UXS1 | rs1470240 | 0.5191927 | 0.918405527 | 0.5593457 | 1.02 (0.95 - 1.1) | |  |  |
| cg05468156 | UXS1 | rs11124097 | 0.2546042 | 0.834924876 | 0.4553599 | 1.01 (0.99 - 1.03) | |  |  |
| cg04315227 | UXS1 | rs67196165 | 0.2669833 | 0.841380897 | 0.7445834 | 1.04 (0.97 - 1.11) | |  |  |
| cg23109721 | UXS1 | rs11124097 | 0.257173 | 0.836239292 | 0.3946172 | 1.04 (0.98 - 1.1) | |  |  |
| cg15412446 | UXS1 | rs11124097 | 0.2551186 | 0.835062067 | 0.3234383 | 1.02 (0.99 - 1.05) | |  |  |
| cg16099169 | UXS1 | rs11124097 | 0.2550455 | 0.835062067 | 0.2945106 | 1.02 (0.99 - 1.05) | |  |  |
| cg00318621 | UXS1 | rs67196165 | 0.2640565 | 0.840254906 | 0.596433 | 1.01 (0.99 - 1.04) | |  |  |
| cg15706973 | ACOXL | rs4849164 | 0.6906047 | 0.956262255 | 0.4114494 | 0.98 (0.88 - 1.09) | |  |  |
| cg15605172 | ACOXL | rs932078 | 0.5164412 | 0.917978133 | 0.8136961 | 1.02 (0.97 - 1.07) | |  |  |
| cg22650315 | INSIG2 | rs10197745 | 0.3939388 | 0.886657389 | 0.9585478 | 1.03 (0.97 - 1.09) | |  |  |
| cg05226506 | INSIG2 | rs12997151 | 0.4426093 | 0.8997726 | 0.8856962 | 0.96 (0.86 - 1.07) | |  |  |
| cg05170494 | INSIG2 | rs76335892 | 0.1710584 | 0.77295689 | 0.5614373 | 0.98 (0.94 - 1.01) | |  |  |
| cg11066750 | DBI | rs11123519 | 0.7686701 | 0.967537324 | 0.2581649 | 0.99 (0.94 - 1.05) | |  |  |
| cg25899024 | DBI | rs12613135 | 0.9022647 | 0.990758602 | 0.2903692 | 1 (0.94 - 1.05) | |  |  |
| cg03940153 | SMPD4 | rs2622026 | 0.789005 | 0.972251328 | 0.9025106 | 0.99 (0.89 - 1.1) | |  |  |
| cg20242066 | LCT | rs2322659 | 0.5593572 | 0.929688955 | 0.564093 | 0.99 (0.96 - 1.02) | |  |  |
| cg04915300 | GPD2 | rs298281 | 0.5472336 | 0.925949063 | 0.9704036 | 1.02 (0.96 - 1.08) | |  |  |
| cg19062174 | GPD2 | rs298308 | 0.5903687 | 0.93585134 | 0.9839608 | 1.01 (0.97 - 1.05) | |  |  |
| cg12807206 | GPD2 | rs298309 | 0.5919969 | 0.93585134 | 0.9704107 | 1.02 (0.95 - 1.09) | |  |  |
| cg23836163 | GPD2 | rs3769359 | 0.9939652 | 0.998800437 | 0.9417913 | 1 (0.94 - 1.07) | |  |  |
| cg24235037 | PLA2R1 | rs62175484 | 0.5291394 | 0.921652415 | 0.02051962 | 1.03 (0.94 - 1.13) | |  |  |
| cg24827600 | CERS6 | rs76327706 | 0.06594217 | 0.656121273 | 0.4117059 | 0.96 (0.93 - 1) | |  |  |
| cg06269299 | G6PC2 | rs540524 | 0.2657846 | 0.840584398 | 1.78358E-05 | 1.04 (0.97 - 1.12) | |  |  |
| cg01111179 | G6PC2 | rs6730651 | 0.4916019 | 0.913191516 | 6.69382E-06 | 1.01 (0.99 - 1.03) | |  |  |
| cg00689835 | G6PC2 | rs6730651 | 0.4945035 | 0.913917741 | 0.003660008 | 1.05 (0.91 - 1.21) | |  |  |
| cg15742848 | G6PC2 | rs1879696 | 0.4858864 | 0.910788741 | 0.000233846 | 0.97 (0.91 - 1.05) | |  |  |
| cg05703053 | G6PC2 | rs1879696 | 0.4856615 | 0.910732133 | 0.00014238 | 0.98 (0.92 - 1.04) | |  |  |
| cg18912768 | ABCB11 | rs9287906 | 0.1417713 | 0.745123529 | 0.01708543 | 0.93 (0.85 - 1.02) | |  |  |
| cg00295325 | ABCB11 | rs4140387 | 0.1484808 | 0.751822906 | 0.06015153 | 0.92 (0.82 - 1.03) | |  |  |
| cg08476215 | GAD1 | rs116706184 | 0.8855286 | 0.987501595 | 0.7135289 | 1 (0.95 - 1.05) | |  |  |
| cg12904135 | GAD1 | rs5003926 | 0.6499596 | 0.946719733 | 0.3256245 | 1.02 (0.94 - 1.11) | |  |  |
| cg00287322 | GAD1 | rs3749035 | 0.7322298 | 0.963155736 | 0.7780018 | 1.02 (0.92 - 1.13) | |  |  |
| cg12801329 | GAD1 | rs3791874 | 0.973774 | 0.997273118 | 0.6089304 | 1 (0.97 - 1.03) | |  |  |
| cg17587327 | GAD1 | rs3791874 | 0.9737742 | 0.997273118 | 0.5875218 | 1 (0.92 - 1.09) | |  |  |
| cg03443455 | GAD1 | rs3762556 | 0.2769365 | 0.84684129 | 0.5980229 | 1.07 (0.95 - 1.22) | |  |  |
| cg13612847 | GAD1 | rs3749034 | 0.3627842 | 0.87634778 | 0.9686517 | 1.04 (0.95 - 1.14) | |  |  |
| cg00915206 | GAD1 | rs3749034 | 0.362086 | 0.875914191 | 0.9675759 | 1.04 (0.96 - 1.12) | |  |  |
| cg07420274 | GAD1 | rs1477061 | 0.3375584 | 0.867614935 | 0.9340655 | 1.04 (0.96 - 1.12) | |  |  |
| cg01089249 | GAD1 | rs1477061 | 0.3354625 | 0.866993418 | 0.9923561 | 1.02 (0.98 - 1.06) | |  |  |
| cg01089319 | GAD1 | rs1477061 | 0.3351137 | 0.866861176 | 0.9752796 | 1.02 (0.98 - 1.05) | |  |  |
| cg14005211 | GAD1 | rs1477061 | 0.3352315 | 0.866861176 | 0.9732274 | 1.02 (0.98 - 1.05) | |  |  |
| cg14486905 | GAD1 | rs12185692 | 0.810476 | 0.976033217 | 0.4424359 | 0.99 (0.92 - 1.07) | |  |  |
| cg09144707 | GAD1 | rs3791869 | 0.7890199 | 0.972251328 | 0.1899636 | 1.01 (0.95 - 1.07) | |  |  |
| cg02723395 | GAD1 | rs3791878 | 0.4256585 | 0.894464203 | 0.6595345 | 0.97 (0.89 - 1.05) | |  |  |
| cg15126544 | GAD1 | rs3762556 | 0.2747958 | 0.845420364 | 0.731114 | 0.94 (0.84 - 1.05) | |  |  |
| cg04105250 | GAD1 | rs3791871 | 0.5406529 | 0.923870899 | 0.4049716 | 0.99 (0.94 - 1.03) | |  |  |
| cg00729049 | GAD1 | rs3762553 | 0.3357895 | 0.867271694 | 0.7012633 | 0.97 (0.93 - 1.03) | |  |  |
| cg21535772 | GAD1 | rs2270334 | 0.3732036 | 0.879218269 | 0.9890488 | 0.97 (0.89 - 1.04) | |  |  |
| cg19846314 | GAD1 | rs1362489 | 0.3205812 | 0.862134112 | 0.9303068 | 0.94 (0.83 - 1.06) | |  |  |
| cg08863440 | GAD1 | rs3791866 | 0.8398186 | 0.981377503 | 0.7609232 | 0.99 (0.91 - 1.07) | |  |  |
| cg07620853 | GAD1 | rs7557793 | 0.1880082 | 0.788421001 | 0.9926439 | 0.97 (0.92 - 1.02) | |  |  |
| cg19655704 | AGPS | rs2364850 | 0.740373 | 0.964580518 | 0.00337554 | 0.99 (0.95 - 1.04) | |  |  |
| cg13547053 | OSBPL6 | rs12478760 | 0.2316005 | 0.821320684 | 0.1752314 | 1.07 (0.96 - 1.19) | |  |  |
| cg22057874 | OSBPL6 | rs12467053 | 0.2536039 | 0.834158356 | 0.2742336 | 1.08 (0.95 - 1.23) | |  |  |
| cg03991736 | PLEKHA3 | rs13026251 | 0.1409322 | 0.744427066 | 0.3186101 | 0.95 (0.88 - 1.02) | |  |  |
| cg15635368 | INPP1 | rs2067454 | 0.456681 | 0.903517607 | 0.06684498 | 1.04 (0.94 - 1.15) | |  |  |
| cg03345805 | INPP1 | rs2067418 | 0.4476173 | 0.90142184 | 0.02167817 | 1.03 (0.95 - 1.12) | |  |  |
| cg25753817 | INPP1 | rs2067412 | 0.8741807 | 0.986803654 | 0.03883424 | 1.01 (0.91 - 1.11) | |  |  |
| cg09351258 | INPP1 | rs10170897 | 0.6008509 | 0.937894714 | 0.4959418 | 1.02 (0.94 - 1.11) | |  |  |
| cg24663311 | INPP1 | rs7601609 | 0.5499965 | 0.92613449 | 0.9631811 | 0.99 (0.97 - 1.01) | |  |  |
| cg27024860 | STRADB | rs7604804 | 0.9370313 | 0.994653626 | 0.05514733 | 1 (0.94 - 1.06) | |  |  |
| cg08521270 | STRADB | rs7604804 | 0.9370317 | 0.994653626 | 0.05399828 | 1 (0.93 - 1.07) | |  |  |
| cg14772913 | IDH1 | rs1370376 | 0.8482243 | 0.983162289 | 0.7817115 | 1 (0.97 - 1.04) | |  |  |
| cg19351166 | PIKFYVE | rs10209089 | 0.5423231 | 0.924398295 | 0.7720396 | 1.03 (0.93 - 1.14) | |  |  |
| cg17730428 | PECR | rs28376683 | 0.1907898 | 0.791632145 | 0.1885255 | 1.08 (0.96 - 1.21) | |  |  |
| cg01872077 | CYP27A1 | rs691140 | 0.1322135 | 0.736319651 | 0.1413738 | 0.92 (0.83 - 1.03) | |  |  |
| cg19187465 | GLB1L | rs72955452 | 0.3719109 | 0.879031675 | 0.159144 | 0.98 (0.95 - 1.02) | |  |  |
| cg01072786 | GLB1L | rs885854 | 0.9944572 | 0.998931451 | 0.0358182 | 1 (0.96 - 1.04) | |  |  |
| cg20314884 | GLB1L | rs885854 | 0.9944572 | 0.998931451 | 0.02538163 | 1 (0.98 - 1.02) | |  |  |
| cg27252970 | GMPPA | rs1567487 | 0.9742271 | 0.997273118 | 0.9200493 | 1 (0.91 - 1.09) | |  |  |
| cg11841522 | GMPPA | rs34553082 | 0.9754468 | 0.997273118 | 0.5709414 | 1 (0.9 - 1.11) |  |  |  |
| cg19497021 | GMPPA | rs10167337 | 0.4164235 | 0.892164413 | 0.2955517 | 1.02 (0.97 - 1.09) | |  |  |
| cg02549182 | GMPPA | rs62191573 | 0.4996479 | 0.915326593 | 0.6750361 | 1.05 (0.92 - 1.2) | |  |  |
| cg03267697 | GMPPA | rs2280039 | 0.3585156 | 0.87454208 | 0.2633016 | 1.03 (0.97 - 1.09) | |  |  |
| cg10091265 | SGPP2 | rs10170413 | 0.4184955 | 0.892570769 | 0.1573563 | 0.99 (0.96 - 1.02) | |  |  |
| cg07873848 | SGPP2 | rs6758392 | 0.4497905 | 0.902036786 | 0.1747571 | 0.99 (0.95 - 1.02) | |  |  |
| cg11300809 | SGPP2 | rs6758392 | 0.4497228 | 0.902036786 | 0.1628128 | 0.99 (0.96 - 1.02) | |  |  |
| cg14435109 | SGPP2 | rs4299328 | 0.6472606 | 0.94603711 | 0.3302355 | 0.99 (0.94 - 1.04) | |  |  |
| cg03182958 | SGPP2 | rs4488656 | 0.5392619 | 0.923264914 | 0.4752628 | 1.03 (0.93 - 1.15) | |  |  |
| cg16171484 | SGPP2 | rs1984746 | 0.633831 | 0.944551386 | 0.3996891 | 0.98 (0.92 - 1.05) | |  |  |
| cg14280181 | SGPP2 | rs4528748 | 0.9124875 | 0.991697329 | 0.2484823 | 1 (0.98 - 1.02) | |  |  |
| cg03458099 | MOGAT1 | rs16863940 | 0.2419036 | 0.828169713 | 0.09466042 | 1.03 (0.98 - 1.09) | |  |  |
| cg23281972 | MOGAT1 | rs193191898 | 0.06797069 | 0.658734439 | 0.2343704 | 1.04 (1 - 1.09) | |  |  |
| cg23325384 | ACSL3 | rs7606898 | 0.1421702 | 0.745700076 | 0.8710792 | 0.93 (0.84 - 1.03) | |  |  |
| cg21498125 | ACSL3 | rs76959794 | 0.1000216 | 0.705140974 | 0.1946807 | 1.1 (0.98 - 1.23) | |  |  |
| cg04192580 | ACSL3 | rs75232832 | 0.05143548 | 0.628451437 |  | 1.04 (1 - 1.09) | |  |  |
| cg13165983 | IRS1 | rs2396337 | 0.2909399 | 0.852988484 | 0.314751 | 0.92 (0.78 - 1.08) | |  |  |
| cg15756114 | IRS1 | rs72979457 | 0.08531877 | 0.687844545 | 0.6275615 | 1.06 (0.99 - 1.14) | |  |  |
| cg01878708 | IRS1 | rs2396388 | 0.08634909 | 0.688613935 | 0.5490328 | 0.95 (0.89 - 1.01) | |  |  |
| cg02892043 | IRS1 | rs7564356 | 0.6358086 | 0.94473796 | 0.4678509 | 1.02 (0.94 - 1.12) | |  |  |
| cg17875028 | ALPI | rs56283912 | 0.7495785 | 0.96647031 | 0.6570546 | 0.99 (0.92 - 1.06) | |  |  |
| cg05007992 | ALPI | rs2003780 | 0.5280899 | 0.921537718 | 0.9078015 | 1.04 (0.93 - 1.15) | |  |  |
| cg12825872 | ALPI | rs2003780 | 0.528826 | 0.921652415 | 0.9953845 | 0.96 (0.85 - 1.09) | |  |  |
| cg12307638 | ALPI | rs2573226 | 0.4480562 | 0.90142184 | 0.2529075 | 0.96 (0.88 - 1.06) | |  |  |
| cg05291025 | NEU2 | rs2233391 | 0.5818686 | 0.933977948 | 0.5869775 | 0.97 (0.88 - 1.07) | |  |  |
| cg22192999 | NEU2 | rs13391656 | 0.9585929 | 0.996245208 | 0.4651181 | 1 (0.96 - 1.04) | |  |  |
| cg02788013 | INPP5D | rs62194574 | 0.2340488 | 0.822622134 | 0.4566408 | 0.98 (0.95 - 1.01) | |  |  |
| cg00438740 | INPP5D | rs34779565 | 0.2622153 | 0.838487694 | 0.4061455 | 0.95 (0.88 - 1.04) | |  |  |
| cg13434263 | INPP5D | rs1141328 | 0.5338248 | 0.922711105 | 0.9053287 | 1.01 (0.99 - 1.03) | |  |  |
| cg05208178 | INPP5D | rs4260233 | 0.4179899 | 0.892500513 | 0.9197479 | 1.04 (0.95 - 1.14) | |  |  |
| cg01218053 | INPP5D | rs113088907 | 0.229867 | 0.82066468 | 0.1518306 | 0.92 (0.79 - 1.06) | |  |  |
| cg05299077 | INPP5D | rs10933431 | 0.2345822 | 0.82286438 | 0.898614 | 1.02 (0.98 - 1.07) | |  |  |
| cg26204079 | DGKD | rs10193542 | 0.2447208 | 0.829874618 | 0.03915313 | 0.96 (0.91 - 1.03) | |  |  |
| cg03263613 | DGKD | rs3762592 | 0.4194521 | 0.892791585 | 0.6158605 | 0.95 (0.84 - 1.07) | |  |  |
| cg26139949 | DGKD | rs2034762 | 0.2395414 | 0.826799626 | 0.9636398 | 1.07 (0.96 - 1.2) | |  |  |
| cg02442900 | DGKD | rs2305540 | 0.2525993 | 0.833663267 | 0.8706396 | 1.07 (0.95 - 1.19) | |  |  |
| cg08436419 | DGKD | rs35502484 | 0.4001257 | 0.887037757 | 0.296281 | 1.05 (0.94 - 1.16) | |  |  |
| cg10224592 | DGKD | rs1441093 | 0.4748157 | 0.908197881 | 0.5939617 | 0.96 (0.86 - 1.08) | |  |  |
| cg05711037 | DGKD | rs3754595 | 0.7304572 | 0.963059146 | 0.3570998 | 1.01 (0.97 - 1.05) | |  |  |
| cg13053135 | DGKD | rs13420688 | 0.7042779 | 0.958680302 | 0.6425726 | 1.02 (0.91 - 1.15) | |  |  |
| cg02901644 | DGKD | rs2305538 | 0.2304018 | 0.820799676 | 0.710835 | 0.95 (0.87 - 1.03) | |  |  |
| cg20428596 | DGKD | rs7724 | 0.7140183 | 0.960070139 | 0.100798 | 0.98 (0.88 - 1.09) | |  |  |
| cg15933914 | UGT1A10 | rs17868315 | 0.1148801 | 0.718592078 | 0.5418052 | 0.95 (0.89 - 1.01) | |  |  |
| cg19975800 | UGT1A10 | rs28444828 | 0.2074901 | 0.804100017 | 0.7462006 | 0.96 (0.9 - 1.02) | |  |  |
| cg01291468 | UGT1A7 | rs2012734 | 0.7560259 | 0.966870715 | 0.5591504 | 0.98 (0.88 - 1.1) | |  |  |
| cg10432859 | UGT1A7 | rs17864684 | 0.07246058 | 0.66788136 | 0.01619495 | 0.91 (0.82 - 1.01) | |  |  |
| cg14121772 | UGT1A6 | rs12476197 | 0.5318314 | 0.921987697 | 0.253073 | 1.02 (0.96 - 1.09) | |  |  |
| cg12385643 | UGT1A6 | rs12476197 | 0.531793 | 0.921986842 | 0.4742401 | 1.02 (0.96 - 1.08) | |  |  |
| cg23874600 | UGT1A6 | rs75444879 | 0.6382903 | 0.945245421 | 0.2767475 | 0.97 (0.87 - 1.09) | |  |  |
| cg15299997 | UGT1A5 | rs17862866 | 0.7259431 | 0.962535985 | 0.2649947 | 0.99 (0.94 - 1.05) | |  |  |
| cg17266515 | UGT1A4 | rs11689628 | 0.1546832 | 0.757822581 | 0.0513113 | 0.98 (0.96 - 1.01) | |  |  |
| cg11272349 | UGT1A3 | rs17863795 | 0.8184287 | 0.977632792 | 0.6140313 | 1.01 (0.93 - 1.09) | |  |  |
| cg08697797 | UGT1A1 | rs887829 | 0.3524529 | 0.872055283 | 0.6400627 | 1.04 (0.96 - 1.12) | |  |  |
| cg03607648 | UGT1A1 | rs6744284 | 0.8403891 | 0.981377503 | 0.1601317 | 0.99 (0.9 - 1.09) | |  |  |
| cg18657700 | AGXT | rs5013752 | 0.5546379 | 0.927970756 | 0.722674 | 0.98 (0.91 - 1.05) | |  |  |
| cg24371033 | AGXT | rs10201556 | 0.7200142 | 0.96106857 | 0.9172788 | 0.98 (0.87 - 1.1) | |  |  |
| cg18315762 | AGXT | rs7600847 | 0.7429286 | 0.965455341 | 0.9685332 | 0.99 (0.96 - 1.03) | |  |  |
| cg11385353 | AGXT | rs10196315 | 0.7422594 | 0.965455341 | 0.9734811 | 0.99 (0.9 - 1.08) | |  |  |
| cg16358738 | AGXT | rs11686679 | 0.7743973 | 0.969046051 | 0.8450564 | 0.99 (0.93 - 1.05) | |  |  |
| cg20515206 | AGXT | rs73105774 | 0.8873741 | 0.987692914 | 0.8057055 | 1.01 (0.92 - 1.1) | |  |  |
| cg01255646 | AGXT | rs4676386 | 0.4685797 | 0.90688033 | 0.9835076 | 0.96 (0.87 - 1.06) | |  |  |
| cg12911589 | NEU4 | rs9973663 | 0.9691317 | 0.997271358 |  | 1 (0.89 - 1.12) | |  |  |
| cg03584389 | NEU4 | rs9973663 | 0.9691315 | 0.997271358 |  | 1 (0.91 - 1.11) | |  |  |
| cg16660312 | NEU4 | rs115963514 | 0.4032043 | 0.888093862 |  | 1.03 (0.96 - 1.12) | |  |  |
| cg00684178 | NEU4 | rs12987998 | 0.1039428 | 0.707034093 | 0.8107849 | 0.95 (0.9 - 1.01) | |  |  |
| cg03372905 | NEU4 | rs2293764 | 0.1172649 | 0.720798285 |  | 0.94 (0.86 - 1.02) | |  |  |
| cg04401100 | NEU4 | rs12987998 | 0.1055812 | 0.708923874 | 0.9311946 | 1.06 (0.99 - 1.14) | |  |  |
| cg17280514 | NEU4 | rs12987998 | 0.1047045 | 0.707659656 | 0.9247608 | 1.05 (0.99 - 1.12) | |  |  |
| cg15746851 | NEU4 | rs12987998 | 0.111683 | 0.7137217 | 0.9698675 | 1.1 (0.98 - 1.23) | |  |  |
| cg17981927 | NEU4 | rs12987998 | 0.1099194 | 0.712026971 | 0.9856517 | 1.09 (0.98 - 1.2) | |  |  |
| cg05195017 | NEU4 | rs2293764 | 0.112589 | 0.715066268 | 0.253485 | 1.03 (0.99 - 1.07) | |  |  |
| cg11518408 | NEU4 | rs12987998 | 0.1033757 | 0.707034093 | 0.3723564 | 0.96 (0.91 - 1.01) | |  |  |
| cg26207766 | NEU4 | rs12987998 | 0.1039681 | 0.707034093 | 0.2402717 | 1.05 (0.99 - 1.11) | |  |  |
| cg03455424 | NEU4 | rs12987998 | 0.1031184 | 0.706905428 | 0.2552093 | 1.04 (0.99 - 1.09) | |  |  |
| cg24840601 | SUMF1 | rs711637 | 0.2730443 | 0.84499581 | 0.4168863 | 1.05 (0.96 - 1.16) | |  |  |
| cg07465754 | SUMF1 | rs17040744 | 0.2418275 | 0.828160144 | 0.6437755 | 0.95 (0.87 - 1.04) | |  |  |
| cg12602909 | SUMF1 | rs2633846 | 0.2166505 | 0.812283087 | 0.5379124 | 1.02 (0.99 - 1.06) | |  |  |
| cg09654471 | ITPR1 | rs73102493 | 0.6407483 | 0.94546956 | 0.2072255 | 1 (0.98 - 1.02) | |  |  |
| cg18689402 | ITPR1 | rs9815192 | 0.791836 | 0.972606953 | 0.170483 | 1 (0.98 - 1.01) | |  |  |
| cg03836615 | ITPR1 | rs12638626 | 0.08790869 | 0.69231701 | 0.08329307 | 0.91 (0.82 - 1.01) | |  |  |
| cg21407899 | ITPR1 | rs17041507 | 0.7476283 | 0.966304674 | 0.3680433 | 1.01 (0.96 - 1.06) | |  |  |
| cg00119284 | CIDEC | rs279593 | 0.5803008 | 0.933477851 | 0.06504402 | 0.98 (0.91 - 1.05) | |  |  |
| cg27513339 | CIDEC | rs183957 | 0.5878008 | 0.93547703 | 0.09053587 | 0.98 (0.92 - 1.05) | |  |  |
| cg23030903 | CIDEC | rs12053867 | 0.1730826 | 0.774502014 | 0.3665381 | 0.93 (0.84 - 1.03) | |  |  |
| cg16777090 | CIDEC | rs12053867 | 0.1683894 | 0.770461824 | 0.168159 | 0.96 (0.91 - 1.02) | |  |  |
| cg04399631 | PPARG | rs114950834 | 0.1874468 | 0.78797087 | 0.1813613 | 0.96 (0.92 - 1.02) | |  |  |
| cg25929976 | PPARG | rs62242116 | 0.000757551 | 0.178514913 | 0.005869989 | 0.75 (0.63 - 0.89) | |  |  |
| cg23514324 | PPARG | rs2920502 | 0.3374384 | 0.867614935 | 0.004252081 | 1.02 (0.98 - 1.06) | |  |  |
| cg04908300 | PPARG | rs62242116 | 0.000480105 | 0.149797638 | 0.01797048 | 0.78 (0.68 - 0.9) | |  |  |
| cg13483696 | HACL1 | rs9839032 | 0.2750502 | 0.845429633 | 0.1241067 | 0.97 (0.93 - 1.02) | |  |  |
| cg16247323 | HACL1 | rs76982303 | 0.6631187 | 0.949991775 | 0.09181149 | 1.03 (0.91 - 1.17) | |  |  |
| cg11084015 | OSBPL10 | rs7628473 | 0.7788912 | 0.97006492 | 0.6100614 | 1.01 (0.92 - 1.11) | |  |  |
| cg03411644 | OSBPL10 | rs60672727 | 0.1223657 | 0.727511471 | 0.7494977 | 1.06 (0.98 - 1.15) | |  |  |
| cg26337497 | OSBPL10 | rs56221938 | 0.7067492 | 0.959271339 | 0.6853677 | 0.99 (0.97 - 1.02) | |  |  |
| cg23429042 | OSBPL10 | rs4955124 | 0.6590299 | 0.948466104 | 0.3356505 | 0.98 (0.91 - 1.06) | |  |  |
| cg27590407 | OSBPL10 | rs4955210 | 0.7541333 | 0.966830973 | 0.7686545 | 1.02 (0.91 - 1.14) | |  |  |
| cg15840985 | OSBPL10 | rs10433586 | 0.08251731 | 0.682310358 | 0.4599991 | 1.13 (0.98 - 1.29) | |  |  |
| cg19143336 | GPD1L | rs12633891 | 0.2336628 | 0.822467683 | 0.2724815 | 0.98 (0.95 - 1.01) | |  |  |
| cg21145686 | GPD1L | rs17028885 | 0.1762795 | 0.77637069 | 0.388968 | 0.94 (0.86 - 1.03) | |  |  |
| cg25679431 | GPD1L | rs72850665 | 0.9351974 | 0.994575934 | 0.01701308 | 1 (0.98 - 1.02) | |  |  |
| cg19000631 | GLB1 | rs11719213 | 0.4015312 | 0.887423359 | 0.08382681 | 1.04 (0.95 - 1.14) | |  |  |
| cg16652328 | GLB1 | rs11719213 | 0.399982 | 0.887037757 | 0.02031599 | 0.97 (0.91 - 1.04) | |  |  |
| cg27034836 | GLB1 | rs4423716 | 0.1314509 | 0.735568826 | 0.06060866 | 0.97 (0.94 - 1.01) | |  |  |
| cg05120113 | GLB1 | rs7643313 | 0.2697107 | 0.843477861 | 0.0307529 | 0.99 (0.96 - 1.01) | |  |  |
| cg03084350 | PLCD1 | rs2070486 | 0.5596521 | 0.929924891 | 0.5982077 | 1.04 (0.92 - 1.17) | |  |  |
| cg24868271 | PLCD1 | rs17787356 | 0.7754469 | 0.969162717 | 0.8993881 | 1.01 (0.92 - 1.12) | |  |  |
| cg10944383 | PLCD1 | rs6599013 | 0.4599221 | 0.904455573 | 0.4194466 | 0.96 (0.85 - 1.07) | |  |  |
| cg20956314 | XYLB | rs55842217 | 0.8496313 | 0.983443004 | 0.6205794 | 0.97 (0.75 - 1.27) | |  |  |
| cg12340144 | XYLB | rs509627 | 0.5941716 | 0.935860936 | 0.8546411 | 1.03 (0.93 - 1.13) | |  |  |
| cg11592576 | CYP8B1 | rs3732860 | 0.04600494 | 0.612995188 | 0.04903538 | 1.07 (1 - 1.14) | |  |  |
| cg09668564 | ABHD5 | rs78619882 | 0.1434266 | 0.747049358 | 0.1778471 | 1.12 (0.96 - 1.29) | |  |  |
| cg18908981 | ABHD5 | rs193048071 | 0.8750007 | 0.986942168 | 0.5847566 | 0.99 (0.82 - 1.18) | |  |  |
| cg21404108 | ABHD5 | rs115421670 | 0.9274095 | 0.993172991 | 0.4985874 | 1 (0.91 - 1.09) | |  |  |
| cg02613034 | ABHD5 | rs73089215 | 0.09967493 | 0.704545608 | 0.7893793 | 1.07 (0.99 - 1.15) | |  |  |
| cg05437648 | ABHD5 | rs193048071 | 0.8749664 | 0.986942168 | 0.3799935 | 1 (0.94 - 1.05) | |  |  |
| cg05383958 | ABHD5 | rs4290783 | 0.09894053 | 0.704300744 | 0.2668266 | 0.91 (0.82 - 1.02) | |  |  |
| cg07746241 | ABHD5 | rs114356344 | 0.06555995 | 0.655065832 | 0.4297186 | 0.91 (0.82 - 1.01) | |  |  |
| cg04837898 | SACM1L | rs4682797 | 0.5918198 | 0.93585134 | 0.6757779 | 0.98 (0.93 - 1.04) | |  |  |
| cg17207780 | SACM1L | rs9851400 | 0.7304516 | 0.963059146 | 0.1999803 | 1.01 (0.94 - 1.09) | |  |  |
| cg27386529 | SCAP | rs115744844 | 0.7267638 | 0.962795777 | 0.3048712 | 0.99 (0.97 - 1.02) | |  |  |
| cg26614073 | SCAP | rs145532912 | 0.8029189 | 0.97484376 | 0.05597253 | 1 (0.96 - 1.03) | |  |  |
| cg18642234 | GPX1 | rs7637665 | 0.0544912 | 0.636742536 | 0.503089 | 1.08 (1 - 1.17) | |  |  |
| cg05055782 | GPX1 | rs4855855 | 0.0591886 | 0.642132015 | 0.4785203 | 1.12 (1 - 1.25) | |  |  |
| cg05551922 | GPX1 | rs4241406 | 0.06674355 | 0.656949719 | 0.6207722 | 1.12 (0.99 - 1.27) | |  |  |
| cg05767306 | AMT | rs2117939 | 0.05379639 | 0.634634617 | 0.09206729 | 0.97 (0.95 - 1) | |  |  |
| cg09222884 | GMPPB | rs116717961 | 0.824463 | 0.978518541 | 0.9104654 | 0.99 (0.92 - 1.07) | |  |  |
| cg17641710 | GNAI2 | rs58051625 | 0.06396885 | 0.652181109 | 0.4311976 | 0.9 (0.81 - 1.01) | |  |  |
| cg18094261 | ALAS1 | rs187084 | 0.4155525 | 0.891918845 | 0.6934525 | 0.97 (0.9 - 1.04) | |  |  |
| cg15698299 | ALAS1 | rs181274 | 0.1149517 | 0.718664964 | 0.998427 | 1.05 (0.99 - 1.12) | |  |  |
| cg07598930 | ALAS1 | rs144166227 | 0.04462905 | 0.608936663 | 0.04740874 | 1.08 (1 - 1.17) | |  |  |
| cg13241645 | ALAS1 | rs614288 | 0.1223504 | 0.727511471 | 0.9904567 | 1.08 (0.98 - 1.18) | |  |  |
| cg24969254 | TKT | rs62256000 | 0.7028701 | 0.958519592 | 0.4212048 | 0.98 (0.88 - 1.09) | |  |  |
| cg16894138 | TKT | rs4687715 | 0.8342947 | 0.980497185 | 0.81518 | 1 (0.96 - 1.03) | |  |  |
| cg07621169 | TKT | rs9830895 | 0.687091 | 0.955249185 | 0.2727724 | 0.99 (0.97 - 1.02) | |  |  |
| cg00748718 | TKT | rs7630080 | 0.1803283 | 0.780695638 | 0.875111 | 0.9 (0.76 - 1.05) | |  |  |
| cg04860291 | TKT | rs7633966 | 0.5524737 | 0.926989479 | 0.5920995 | 0.97 (0.86 - 1.08) | |  |  |
| cg00836091 | TKT | rs141424904 | 0.2106059 | 0.807755727 | 0.6491095 | 0.93 (0.83 - 1.04) | |  |  |
| cg00223877 | TKT | rs7633966 | 0.5506766 | 0.92637421 | 0.4703051 | 0.99 (0.94 - 1.03) | |  |  |
| cg19378537 | TKT | rs7633966 | 0.5504908 | 0.92637421 | 0.5871151 | 0.99 (0.96 - 1.02) | |  |  |
| cg00707777 | TKT | rs6792874 | 0.5592091 | 0.92966662 | 0.7510291 | 0.99 (0.95 - 1.03) | |  |  |
| cg07918978 | TKT | rs62256059 | 0.5620445 | 0.93016413 | 0.9812751 | 0.99 (0.95 - 1.03) | |  |  |
| cg09627520 | PDHB | rs77936839 | 0.1303122 | 0.734868859 | 0.2907156 | 1.03 (0.99 - 1.06) | |  |  |
| cg07576186 | PDHB | rs6770113 | 0.5313581 | 0.92186639 | 0.034597 | 1.01 (0.99 - 1.03) | |  |  |
| cg26110898 | PDHB | rs56281646 | 0.6028506 | 0.937895724 | 0.03917191 | 0.99 (0.95 - 1.03) | |  |  |
| cg16209444 | ACOX2 | rs7646603 | 0.1668042 | 0.769478101 | 0.3430748 | 0.96 (0.9 - 1.02) | |  |  |
| cg16587010 | ACOX2 | rs7646603 | 0.1649365 | 0.767218957 | 0.2326345 | 1.03 (0.99 - 1.07) | |  |  |
| cg13705284 | ACOX2 | rs58279771 | 0.4153886 | 0.891884871 | 0.0587337 | 0.98 (0.92 - 1.04) | |  |  |
| cg07438401 | SUCLG2 | rs6786211 | 0.9868796 | 0.99807993 | 0.8997933 | 1 (0.92 - 1.09) | |  |  |
| cg18194850 | SUCLG2 | rs13099253 | 0.9974199 | 0.999614083 | 0.8601573 | 1 (0.91 - 1.1) |  |  |  |
| cg13668339 | SUCLG2 | rs13069212 | 0.9947318 | 0.998966109 | 0.8761428 | 1 (0.96 - 1.04) | |  |  |
| cg07356753 | GBE1 | rs7620240 | 0.6921193 | 0.956525804 | 0.6368616 | 0.99 (0.97 - 1.02) | |  |  |
| cg17482114 | ADCY5 | rs9839740 | 0.02072934 | 0.515577968 | 0.002576088 | 0.87 (0.78 - 0.98) | |  |  |
| cg19013391 | ADCY5 | rs62262433 | 0.9135263 | 0.991697329 | 0.3002738 | 1 (0.91 - 1.09) | |  |  |
| cg04908625 | ADCY5 | rs4678030 | 0.8396247 | 0.981377503 | 0.1618516 | 0.99 (0.88 - 1.11) | |  |  |
| cg13878010 | ADCY5 | rs10511416 | 0.6965601 | 0.957319153 | 0.1081215 | 1.02 (0.93 - 1.11) | |  |  |
| cg15993383 | ADCY5 | rs62262433 | 0.9135216 | 0.991697329 | 0.06733109 | 1 (0.94 - 1.06) | |  |  |
| cg04138502 | ADCY5 | rs4678030 | 0.8395413 | 0.981377503 | 0.006271645 | 1 (0.96 - 1.03) | |  |  |
| cg13384396 | ADCY5 | rs4678030 | 0.8395434 | 0.981377503 | 0.00114297 | 1 (0.96 - 1.04) | |  |  |
| cg02978184 | ADCY5 | rs62262433 | 0.9135217 | 0.991697329 | 0.061922 | 1 (0.93 - 1.06) | |  |  |
| cg13483026 | ADCY5 | rs4678030 | 0.8395707 | 0.981377503 | 0.02082457 | 0.99 (0.92 - 1.07) | |  |  |
| cg22974210 | ADCY5 | rs7623162 | 0.680407 | 0.953778454 | 0.2264051 | 1.02 (0.92 - 1.14) | |  |  |
| cg20104116 | MGLL | rs2630210 | 0.3445844 | 0.870160803 | 0.4290383 | 0.95 (0.85 - 1.06) | |  |  |
| cg16027775 | MGLL | rs57454546 | 0.6746166 | 0.952414278 | 0.1393645 | 0.99 (0.94 - 1.04) | |  |  |
| cg08036172 | MGLL | rs664910 | 0.4862764 | 0.911152305 | 0.1527342 | 0.97 (0.9 - 1.05) | |  |  |
| cg22514722 | MGLL | rs664910 | 0.4853405 | 0.910710331 | 0.09434573 | 0.99 (0.95 - 1.02) | |  |  |
| cg15694422 | MGLL | rs664910 | 0.4852833 | 0.910710331 | 0.1395941 | 0.99 (0.95 - 1.02) | |  |  |
| cg03781224 | MGLL | rs72626379 | 0.4558555 | 0.903517607 | 0.5224162 | 1.04 (0.93 - 1.16) | |  |  |
| cg12153222 | PIK3R4 | rs76028718 | 0.7232272 | 0.961554924 | 0.4766693 | 1.01 (0.97 - 1.05) | |  |  |
| cg23194766 | PPP2R3A | rs35188750 | 0.5385936 | 0.922908866 | 0.6473409 | 0.97 (0.88 - 1.07) | |  |  |
| cg04907151 | PPP2R3A | rs35188750 | 0.5377152 | 0.922827354 | 0.3270658 | 0.98 (0.93 - 1.04) | |  |  |
| cg07038400 | PPP2R3A | rs1523595 | 0.4526527 | 0.902300409 | 0.5355998 | 0.98 (0.93 - 1.03) | |  |  |
| cg24636867 | PPP2R3A | rs10935175 | 0.4747172 | 0.908169984 | 0.3700668 | 1.04 (0.94 - 1.16) | |  |  |
| cg20299697 | MRAS | rs4894358 | 0.2331333 | 0.822436696 | 0.2262198 | 0.93 (0.81 - 1.05) | |  |  |
| cg22907952 | ESYT3 | rs2291127 | 0.5757143 | 0.932352207 | 0.181893 | 1.02 (0.95 - 1.1) | |  |  |
| cg09373148 | ESYT3 | rs1679181 | 0.3310163 | 0.865562705 | 0.8981848 | 0.97 (0.92 - 1.03) | |  |  |
| cg11885357 | ESYT3 | rs1679181 | 0.3322052 | 0.865888244 | 0.7919067 | 0.97 (0.9 - 1.03) | |  |  |
| cg11209249 | ESYT3 | rs1066197 | 0.204162 | 0.801739423 | 0.1159715 | 0.94 (0.85 - 1.04) | |  |  |
| cg22160121 | ESYT3 | rs13091159 | 0.3124537 | 0.85912998 | 0.8059105 | 0.94 (0.84 - 1.06) | |  |  |
| cg21075829 | ESYT3 | rs1679181 | 0.3329831 | 0.865977956 | 0.8680144 | 0.96 (0.89 - 1.04) | |  |  |
| cg01905210 | ESYT3 | rs1679170 | 0.9749323 | 0.997273118 | 0.5791189 | 1 (0.96 - 1.05) | |  |  |
| cg21464115 | ESYT3 | rs1066197 | 0.207122 | 0.8038433 | 0.1802738 | 0.93 (0.82 - 1.04) | |  |  |
| cg04810656 | ESYT3 | rs187616985 | 0.5673423 | 0.931319656 | 0.002620211 | 1.03 (0.93 - 1.13) | |  |  |
| cg05710753 | AGTR1 | rs275653 | 0.449786 | 0.902036786 | 0.1995998 | 1.04 (0.93 - 1.17) | |  |  |
| cg20906621 | AGTR1 | rs139336408 | 0.4839299 | 0.910313273 | 0.3973378 | 1.03 (0.95 - 1.13) | |  |  |
| cg10784511 | AGTR1 | rs12695877 | 0.2630048 | 0.839023612 | 0.1975728 | 1.04 (0.97 - 1.13) | |  |  |
| cg15463966 | AGTR1 | rs12721272 | 0.2996457 | 0.857247407 | 0.7725962 | 1.05 (0.96 - 1.15) | |  |  |
| cg14866567 | GYG1 | rs2165342 | 0.4412041 | 0.8997726 | 0.1822205 | 0.99 (0.97 - 1.01) | |  |  |
| cg04081257 | GYG1 | rs80094038 | 0.5480538 | 0.925996596 | 0.7994804 | 1.02 (0.95 - 1.1) | |  |  |
| cg10256468 | GYG1 | rs2034906 | 0.4335847 | 0.897041506 | 0.357402 | 0.97 (0.9 - 1.04) | |  |  |
| cg06123891 | GYG1 | rs4681477 | 0.2106836 | 0.807814753 | 0.4105412 | 1.07 (0.96 - 1.2) | |  |  |
| cg13639536 | GYG1 | rs772816 | 0.1129132 | 0.71575703 | 0.05017201 | 0.96 (0.92 - 1.01) | |  |  |
| cg02344477 | PLCH1 | rs6441010 | 0.2667202 | 0.841237864 | 0.5441799 | 1.01 (0.99 - 1.03) | |  |  |
| cg12679230 | PLCH1 | rs358740 | 0.1204848 | 0.72536411 | 0.498624 | 0.97 (0.94 - 1.01) | |  |  |
| cg05584597 | PLCH1 | rs28531688 | 0.4660677 | 0.905874792 | 0.3070812 | 0.96 (0.87 - 1.06) | |  |  |
| cg07891507 | PLCH1 | rs28531688 | 0.464655 | 0.905508735 | 0.5159668 | 0.97 (0.91 - 1.05) | |  |  |
| cg17822007 | PLCH1 | rs28531688 | 0.4651581 | 0.905564205 | 0.2736821 | 0.97 (0.89 - 1.05) | |  |  |
| cg07700234 | PPM1L | rs114871916 | 0.637768 | 0.945171847 | 0.3993066 | 1.01 (0.96 - 1.08) | |  |  |
| cg02470874 | PPM1L | rs1598495 | 0.9753468 | 0.997273118 | 0.6878165 | 1 (0.93 - 1.08) | |  |  |
| cg02782510 | B3GALNT1 | rs28540230 | 0.3501768 | 0.871901204 | 0.5808875 | 0.93 (0.8 - 1.08) | |  |  |
| cg21146905 | B3GALNT1 | rs13098896 | 0.532744 | 0.922328474 | 0.7780779 | 1.02 (0.95 - 1.1) | |  |  |
| cg12349858 | B3GALNT1 | rs13060601 | 0.9608187 | 0.996245208 | 0.3293096 | 1 (0.92 - 1.08) | |  |  |
| cg23252387 | B3GALNT1 | rs34221255 | 0.8119083 | 0.97617406 | 0.725981 | 1.01 (0.92 - 1.11) | |  |  |
| cg25469234 | B3GALNT1 | rs13060601 | 0.9608186 | 0.996245208 | 0.334486 | 1 (0.92 - 1.08) | |  |  |
| cg25635352 | B3GALNT1 | rs13060601 | 0.9608189 | 0.996245208 | 0.5209013 | 1 (0.91 - 1.1) |  |  |  |
| cg13279566 | B3GALNT1 | rs12488318 | 0.1245048 | 0.729965288 | 0.2181402 | 1.12 (0.97 - 1.28) | |  |  |
| cg00160619 | B3GALNT1 | rs2061580 | 0.3058331 | 0.857248999 | 0.4040048 | 1.06 (0.95 - 1.2) | |  |  |
| cg05725721 | B3GALNT1 | rs9830139 | 0.141923 | 0.745239139 | 0.604861 | 1.05 (0.98 - 1.11) | |  |  |
| cg12927753 | B3GALNT1 | rs7634115 | 0.2101044 | 0.807595645 | 0.4972044 | 1.04 (0.98 - 1.11) | |  |  |
| cg23730617 | B3GALNT1 | rs1599386 | 0.3172724 | 0.861281051 | 0.1886984 | 1.02 (0.98 - 1.05) | |  |  |
| cg02461627 | SPTSSB | rs62279930 | 0.8409986 | 0.98159841 | 0.4373858 | 0.98 (0.8 - 1.2) | |  |  |
| cg06054026 | SPTSSB | rs462081 | 0.120702 | 0.72536411 | 0.1326605 | 1.1 (0.97 - 1.24) | |  |  |
| cg19219364 | SI | rs116786451 | 0.3321593 | 0.865874575 | 0.1365267 | 1.16 (0.86 - 1.57) | |  |  |
| cg09406615 | BCHE | rs79697219 | 0.06694746 | 0.657145675 | 0.5757741 | 1.07 (1 - 1.15) | |  |  |
| cg06085579 | PLD1 | rs13077802 | 0.9869195 | 0.99807993 | 0.439596 | 1 (0.97 - 1.04) | |  |  |
| cg04107939 | PLD1 | rs2141747 | 0.5661773 | 0.931164956 | 0.8782976 | 1.02 (0.96 - 1.07) | |  |  |
| cg17566735 | PLD1 | rs4389507 | 0.9597292 | 0.996245208 | 0.7708625 | 1 (0.89 - 1.13) | |  |  |
| cg00082310 | PLD1 | rs73176191 | 0.952756 | 0.996245208 | 0.7578563 | 1 (0.92 - 1.08) | |  |  |
| cg17024257 | PLD1 | rs7620819 | 0.6869687 | 0.9552214 | 0.7437945 | 1.01 (0.96 - 1.07) | |  |  |
| cg07560922 | PLD1 | rs4894773 | 0.8030857 | 0.97484376 | 0.9017346 | 1.02 (0.9 - 1.14) | |  |  |
| cg00799078 | NCEH1 | rs10804848 | 0.6037829 | 0.938300935 | 0.8197075 | 1.01 (0.98 - 1.04) | |  |  |
| cg12375561 | TBL1XR1 | rs4857653 | 0.4329375 | 0.89682142 | 0.2204847 | 0.98 (0.94 - 1.03) | |  |  |
| cg02255454 | TBL1XR1 | rs6443409 | 0.1196261 | 0.723894751 | 0.07886329 | 1.09 (0.98 - 1.2) | |  |  |
| cg10747185 | TBL1XR1 | rs73187545 | 0.2218103 | 0.816257756 | 0.8250355 | 1.08 (0.96 - 1.21) | |  |  |
| cg17578639 | TBL1XR1 | rs58969798 | 0.06934516 | 0.662680766 | 0.1782071 | 1.05 (1 - 1.11) | |  |  |
| cg01132484 | TBL1XR1 | rs7648625 | 0.1431501 | 0.747049358 | 0.4658069 | 0.96 (0.92 - 1.01) | |  |  |
| cg18475969 | TBL1XR1 | rs6779088 | 0.2536702 | 0.834158356 | 0.8055943 | 1.04 (0.97 - 1.11) | |  |  |
| cg23547348 | TBL1XR1 | rs6764432 | 0.4178583 | 0.892500513 | 0.3661117 | 1.04 (0.95 - 1.14) | |  |  |
| cg02913882 | TBL1XR1 | rs62297182 | 0.9257257 | 0.993086627 | 0.3165415 | 1 (0.93 - 1.08) | |  |  |
| cg24272902 | PIK3CA | rs145728596 | 0.6875795 | 0.955356175 | 0.4210217 | 0.95 (0.76 - 1.2) | |  |  |
| cg06508320 | PEX5L | rs139166420 | 0.4269373 | 0.894792174 | 0.5943118 | 0.94 (0.81 - 1.09) | |  |  |
| cg05131623 | PEX5L | rs55895012 | 0.4811309 | 0.909200389 | 0.8685127 | 1.03 (0.94 - 1.13) | |  |  |
| cg25218649 | PEX5L | rs11718127 | 0.4629 | 0.905194893 | 0.3991498 | 1.03 (0.96 - 1.1) | |  |  |
| cg08099797 | LIPH | rs80237402 | 0.3801924 | 0.881401666 | 0.2890919 | 1.02 (0.98 - 1.06) | |  |  |
| cg23620049 | LIPH | rs77971973 | 0.3729497 | 0.879218269 | 0.2164059 | 1.02 (0.98 - 1.05) | |  |  |
| cg15367247 | DGKG | rs2300706 | 0.9546902 | 0.996245208 | 0.4258925 | 1 (0.97 - 1.03) | |  |  |
| cg04589761 | DGKG | rs2268819 | 0.9831757 | 0.99749749 | 0.8520839 | 1 (0.94 - 1.06) | |  |  |
| cg00404400 | DGKG | rs34323411 | 0.8939355 | 0.989501886 | 0.6873159 | 1.01 (0.9 - 1.12) | |  |  |
| cg02820717 | DGKG | rs6794653 | 0.2262315 | 0.818150163 | 0.905963 | 0.98 (0.94 - 1.01) | |  |  |
| cg05578595 | ADIPOQ | rs115527175 | 0.7720827 | 0.968395542 | 0.9945756 | 0.99 (0.94 - 1.05) | |  |  |
| cg09516202 | ADIPOQ | rs28448753 | 0.103697 | 0.707034093 | 0.1702715 | 0.91 (0.81 - 1.02) | |  |  |
| cg10681525 | ADIPOQ | rs79416917 | 0.2161765 | 0.811839907 | 0.8502059 | 1.1 (0.95 - 1.27) | |  |  |
| cg14777903 | HRASLS | rs7610251 | 0.7421558 | 0.965420685 | 0.6076996 | 0.99 (0.93 - 1.05) | |  |  |
| cg08376864 | HRASLS | rs7610251 | 0.7424565 | 0.965455341 | 0.9557304 | 0.98 (0.86 - 1.11) | |  |  |
| cg20115827 | PCYT1A | rs4916456 | 0.3825141 | 0.88224618 | 0.2531094 | 1.02 (0.97 - 1.08) | |  |  |
| cg27319530 | BDH1 | rs11923306 | 0.5249157 | 0.920568019 | 0.6602423 | 1.01 (0.97 - 1.06) | |  |  |
| cg09654796 | BDH1 | rs13093536 | 0.6654654 | 0.950540027 | 0.6234153 | 0.99 (0.93 - 1.05) | |  |  |
| cg06629120 | BDH1 | rs2060087 | 0.9358839 | 0.994575934 | 0.3047988 | 1 (0.92 - 1.08) | |  |  |
| cg21793452 | BDH1 | rs73074462 | 0.7192181 | 0.96106857 | 0.1578151 | 1.01 (0.96 - 1.07) | |  |  |
| cg25120484 | BDH1 | rs12718045 | 0.5471988 | 0.925949063 | 0.789093 | 1.04 (0.92 - 1.16) | |  |  |
| cg16876219 | BDH1 | rs2567361 | 0.6500912 | 0.946720059 | 0.8513159 | 1.03 (0.91 - 1.16) | |  |  |
| cg21447717 | BDH1 | rs9325394 | 0.258824 | 0.836584817 | 0.799185 | 1.05 (0.96 - 1.15) | |  |  |
| cg06268398 | BDH1 | rs2567362 | 0.3830584 | 0.882312516 | 0.9242232 | 1.04 (0.96 - 1.13) | |  |  |
| cg04678713 | BDH1 | rs748397 | 0.384701 | 0.88280886 | 0.9794334 | 1.03 (0.97 - 1.09) | |  |  |
| cg24921799 | BDH1 | rs1050119 | 0.6418545 | 0.945588677 | 0.4842206 | 1.01 (0.97 - 1.05) | |  |  |
| cg09610644 | BDH1 | rs62282550 | 0.6403789 | 0.94546956 | 0.1608111 | 0.99 (0.95 - 1.03) | |  |  |
| cg02569554 | BDH1 | rs71325620 | 0.6416332 | 0.94546956 | 0.7914423 | 0.98 (0.89 - 1.08) | |  |  |
| cg03038685 | BDH1 | rs73085612 | 0.494195 | 0.913815818 | 0.8733038 | 0.96 (0.86 - 1.08) | |  |  |
| cg05580784 | BDH1 | rs11711217 | 0.3644921 | 0.876694514 | 0.09177263 | 1.01 (0.98 - 1.05) | |  |  |
| cg02070118 | DGKQ | rs11248057 | 0.6226763 | 0.942674315 | 0.5483182 | 1.02 (0.95 - 1.09) | |  |  |
| cg18586891 | DGKQ | rs11248059 | 0.8128246 | 0.976403998 | 0.3880153 | 1 (0.97 - 1.05) | |  |  |
| cg05667917 | DGKQ | rs6599390 | 0.9067039 | 0.990905083 | 0.3198668 | 1 (0.98 - 1.03) | |  |  |
| cg25403803 | DGKQ | rs116777977 | 0.6413347 | 0.94546956 | 0.4880621 | 1.02 (0.92 - 1.14) | |  |  |
| cg00846425 | DGKQ | rs2290402 | 0.334748 | 0.866861176 | 0.9454866 | 0.97 (0.91 - 1.03) | |  |  |
| cg05178683 | DGKQ | rs4690326 | 0.5525648 | 0.927072134 | 0.3969064 | 0.98 (0.92 - 1.05) | |  |  |
| cg06494872 | DGKQ | rs3733346 | 0.4280102 | 0.895185268 | 0.5115521 | 0.96 (0.87 - 1.06) | |  |  |
| cg24158141 | DGKQ | rs3733349 | 0.1579266 | 0.761168536 | 0.5289097 | 0.97 (0.93 - 1.01) | |  |  |
| cg07002902 | DGKQ | rs62295555 | 0.7401908 | 0.964567368 | 0.6895188 | 0.98 (0.87 - 1.11) | |  |  |
| cg11107149 | DGKQ | rs3733346 | 0.4260176 | 0.894464203 | 0.5352282 | 0.98 (0.93 - 1.03) | |  |  |
| cg07007312 | DGKQ | rs111344337 | 0.2107593 | 0.807929423 | 0.6871999 | 0.98 (0.96 - 1.01) | |  |  |
| cg22718636 | DGKQ | rs13101828 | 0.1690317 | 0.771017828 | 0.5820582 | 0.98 (0.96 - 1.01) | |  |  |
| cg20456258 | DGKQ | rs13101828 | 0.1689467 | 0.771017828 | 0.6290253 | 0.98 (0.96 - 1.01) | |  |  |
| cg02099267 | DGKQ | rs3806755 | 0.08271201 | 0.682351674 | 0.02976647 | 0.99 (0.97 - 1) | |  |  |
| cg19408572 | DGKQ | rs1377586 | 0.1622345 | 0.764549009 | 0.4024578 | 0.98 (0.96 - 1.01) | |  |  |
| cg22890737 | LRPAP1 | rs1794417 | 0.8827433 | 0.987274802 | 0.7939022 | 1 (0.97 - 1.04) | |  |  |
| cg00356499 | LRPAP1 | rs1794417 | 0.8827403 | 0.987274802 | 0.6743798 | 1 (0.98 - 1.02) | |  |  |
| cg26401028 | LRPAP1 | rs1794417 | 0.8827402 | 0.987274802 | 0.7996504 | 1 (0.98 - 1.02) | |  |  |
| cg04857395 | LRPAP1 | rs1794417 | 0.8827401 | 0.987274802 | 0.6416395 | 1 (0.98 - 1.02) | |  |  |
| cg27321949 | LRPAP1 | rs1794417 | 0.8827411 | 0.987274802 | 0.5653224 | 1 (0.97 - 1.02) | |  |  |
| cg08297640 | LRPAP1 | rs1794417 | 0.8827417 | 0.987274802 | 0.6359658 | 1 (0.97 - 1.03) | |  |  |
| cg20494878 | LRPAP1 | rs112147959 | 0.7924251 | 0.972850081 | 0.6991559 | 1 (0.96 - 1.03) | |  |  |
| cg22659267 | LRPAP1 | rs11725303 | 0.9633142 | 0.996245208 | 0.7299518 | 1 (0.94 - 1.07) | |  |  |
| cg21315176 | LRPAP1 | rs114094073 | 0.7727857 | 0.968475613 | 0.2875227 | 1.02 (0.88 - 1.18) | |  |  |
| cg01324212 | LRPAP1 | rs3135165 | 0.6863499 | 0.954950662 | 0.6061932 | 0.99 (0.97 - 1.02) | |  |  |
| cg13713155 | LRPAP1 | rs6789 | 0.9749572 | 0.997273118 | 0.582726 | 1 (0.95 - 1.06) | |  |  |
| cg07955126 | LRPAP1 | rs78770234 | 0.8952678 | 0.989845138 | 0.06750625 | 1 (0.96 - 1.05) | |  |  |
| cg02846431 | LRPAP1 | rs78770234 | 0.8952688 | 0.989845138 | 0.1016002 | 1 (0.95 - 1.06) | |  |  |
| cg17266278 | LRPAP1 | rs76316256 | 0.9074754 | 0.99095286 | 0.2416862 | 1.01 (0.87 - 1.17) | |  |  |
| cg23903787 | LRPAP1 | rs73197140 | 0.1330029 | 0.737035493 | 0.4275551 | 1.02 (0.99 - 1.04) | |  |  |
| cg19096034 | LRPAP1 | rs76727478 | 0.6910391 | 0.956343454 | 0.3955397 | 1.01 (0.95 - 1.08) | |  |  |
| cg22066108 | LRPAP1 | rs10007398 | 0.7725678 | 0.968414681 | 0.5782155 | 0.99 (0.9 - 1.08) | |  |  |
| cg16511795 | LRPAP1 | rs2474787 | 0.4651247 | 0.905564205 | 0.3776678 | 1.03 (0.96 - 1.1) | |  |  |
| cg20793532 | PPP2R2C | rs13124487 | 0.4613662 | 0.904743358 | 0.9325573 | 0.98 (0.94 - 1.03) | |  |  |
| cg17795695 | PPP2R2C | rs6822123 | 0.3813091 | 0.881767111 | 0.9041813 | 0.98 (0.93 - 1.03) | |  |  |
| cg01363474 | PPP2R2C | rs13124487 | 0.4615107 | 0.904743358 | 0.9290569 | 0.98 (0.93 - 1.03) | |  |  |
| cg11854860 | PPP2R2C | rs875864 | 0.0781796 | 0.674602752 | 0.6659377 | 1.06 (0.99 - 1.14) | |  |  |
| cg20392088 | PPP2R2C | rs16838698 | 0.1089732 | 0.711986026 | 0.4968172 | 1.05 (0.99 - 1.11) | |  |  |
| cg20689476 | PPP2R2C | rs16838698 | 0.1175347 | 0.721120035 | 0.6858034 | 0.91 (0.81 - 1.02) | |  |  |
| cg11343429 | PPP2R2C | rs55872473 | 0.4245852 | 0.894382935 | 0.7442228 | 1.04 (0.94 - 1.16) | |  |  |
| cg13644262 | PPP2R2C | rs12640531 | 0.628901 | 0.944388835 | 0.7759089 | 0.97 (0.88 - 1.08) | |  |  |
| cg22716633 | PPP2R2C | rs10212731 | 0.2463152 | 0.830523002 | 0.2896715 | 1.06 (0.96 - 1.18) | |  |  |
| cg01813642 | PPP2R2C | rs10014119 | 0.07258435 | 0.66788136 | 0.654739 | 1.04 (1 - 1.08) | |  |  |
| cg17450621 | PPP2R2C | rs34907862 | 0.2270513 | 0.818779833 | 0.9074251 | 0.92 (0.8 - 1.06) | |  |  |
| cg07867360 | PPP2R2C | rs62286083 | 0.3143267 | 0.859879081 | 0.4117692 | 0.93 (0.8 - 1.08) | |  |  |
| cg02766173 | PPP2R2C | rs62286083 | 0.3142796 | 0.859879081 | 0.5075125 | 0.92 (0.79 - 1.08) | |  |  |
| cg15994861 | PPP2R2C | rs113517707 | 0.8099191 | 0.976033217 | 0.4290396 | 1.01 (0.9 - 1.14) | |  |  |
| cg25766271 | PPP2R2C | rs875579 | 0.9853501 | 0.997836182 | 0.5743527 | 1 (0.94 - 1.06) | |  |  |
| cg04334422 | ACOX3 | rs180702839 | 0.9780135 | 0.99741562 | 0.4837417 | 1 (0.81 - 1.23) | |  |  |
| cg25963412 | ACOX3 | rs12649477 | 0.339782 | 0.868140958 | 0.6069163 | 0.96 (0.9 - 1.04) | |  |  |
| cg08722675 | ACOX3 | rs28687101 | 0.6474862 | 0.946134883 | 0.4913039 | 1.03 (0.91 - 1.16) | |  |  |
| cg22111705 | ACOX3 | rs2688224 | 0.09032033 | 0.695997445 | 0.9858721 | 1.1 (0.99 - 1.23) | |  |  |
| cg23345579 | MED28 | rs7678654 | 0.7049778 | 0.958814904 | 0.3431588 | 0.98 (0.9 - 1.07) | |  |  |
| cg20506344 | MED28 | rs2215450 | 0.5790772 | 0.933477851 | 0.3991848 | 1.02 (0.95 - 1.1) | |  |  |
| cg18681998 | MED28 | rs10011865 | 0.711072 | 0.95939651 | 0.2573419 | 0.99 (0.94 - 1.04) | |  |  |
| cg02297831 | MED28 | rs9884787 | 0.7925119 | 0.972852293 | 0.1316584 | 1.01 (0.92 - 1.11) | |  |  |
| cg24512731 | GBA3 | rs2258829 | 0.4310972 | 0.896260257 | 0.8303818 | 0.96 (0.87 - 1.06) | |  |  |
| cg01453391 | GBA3 | rs2258829 | 0.4318932 | 0.896537684 | 0.8090366 | 0.96 (0.86 - 1.07) | |  |  |
| cg11210703 | GBA3 | rs6818185 | 0.8155983 | 0.976486368 | 0.8596837 | 1 (0.97 - 1.03) | |  |  |
| cg10955995 | PPARGC1A | rs111898513 | 0.1627935 | 0.76467076 | 0.4006185 | 1.11 (0.96 - 1.27) | |  |  |
| cg24716152 | PPARGC1A | rs61076774 | 0.8280554 | 0.979295577 | 0.5481733 | 0.99 (0.87 - 1.12) | |  |  |
| cg19701879 | PPARGC1A | rs4469064 | 0.9868159 | 0.99807993 | 0.465688 | 1 (0.94 - 1.06) | |  |  |
| cg20723350 | PPARGC1A | rs58990583 | 0.5599274 | 0.929984949 | 0.6176395 | 1.03 (0.93 - 1.14) | |  |  |
| cg11270806 | PPARGC1A | rs4568225 | 0.8760749 | 0.986942168 | 0.05654095 | 0.99 (0.93 - 1.07) | |  |  |
| cg27514608 | PPARGC1A | rs61795680 | 0.8093703 | 0.97587589 | 0.08978307 | 0.99 (0.91 - 1.07) | |  |  |
| cg27461259 | PPARGC1A | rs17637318 | 0.9841512 | 0.997602251 | 0.1390889 | 1 (0.91 - 1.09) | |  |  |
| cg18099096 | PPARGC1A | rs10938973 | 0.7570943 | 0.966870715 | 0.6199599 | 1 (0.97 - 1.02) | |  |  |
| cg13730600 | PPARGC1A | rs6448238 | 0.742807 | 0.965455341 | 0.802681 | 1.02 (0.92 - 1.12) | |  |  |
| cg03281309 | PPARGC1A | rs619646 | 0.6851783 | 0.954724977 | 0.8232491 | 1.01 (0.97 - 1.05) | |  |  |
| cg11967111 | PPARGC1A | rs13133451 | 0.2411906 | 0.82766586 | 0.4154189 | 0.93 (0.83 - 1.05) | |  |  |
| cg21705324 | PPARGC1A | rs10015817 | 0.2086768 | 0.805746951 | 0.1061514 | 0.89 (0.73 - 1.07) | |  |  |
| cg02722613 | PI4K2B | rs73094683 | 0.1872074 | 0.787837431 | 0.3950272 | 1.02 (0.99 - 1.04) | |  |  |
| cg09075114 | PI4K2B | rs73094683 | 0.1956659 | 0.796644034 | 0.2489879 | 1.1 (0.95 - 1.26) | |  |  |
| cg27020260 | PI4K2B | rs3796795 | 0.6507411 | 0.946720059 | 0.3333114 | 0.98 (0.9 - 1.06) | |  |  |
| cg05965402 | PI4K2B | rs6824406 | 0.6774058 | 0.953201784 |  | 1.03 (0.91 - 1.15) | |  |  |
| cg01149896 | PGM2 | rs149207570 | 0.216097 | 0.811687258 | 0.9981333 | 1.17 (0.91 - 1.49) | |  |  |
| cg11143953 | PDGFRA | rs62323589 | 0.3520783 | 0.872055283 | 0.7972374 | 1.02 (0.98 - 1.05) | |  |  |
| cg02987906 | PDGFRA | rs3765158 | 0.2435187 | 0.829268398 | 0.5642924 | 1.03 (0.98 - 1.07) | |  |  |
| cg19408398 | PDGFRA | rs3765158 | 0.2430225 | 0.828928244 | 0.5326139 | 1.02 (0.99 - 1.05) | |  |  |
| cg27468224 | PDGFRA | rs13114613 | 0.4699766 | 0.907171902 | 0.5748587 | 0.97 (0.88 - 1.06) | |  |  |
| cg02525826 | PDGFRA | rs7676972 | 0.3752698 | 0.879826483 | 0.619121 | 1.05 (0.95 - 1.16) | |  |  |
| cg17187183 | PDGFRA | rs73252942 | 0.2582522 | 0.836471869 | 0.4514348 | 0.99 (0.97 - 1.01) | |  |  |
| cg00691999 | PDGFRA | rs4864504 | 0.6769975 | 0.953016044 | 0.5009295 | 0.98 (0.9 - 1.07) | |  |  |
| cg04448477 | PDGFRA | rs7673597 | 0.2454589 | 0.830238063 | 0.6140884 | 0.93 (0.82 - 1.05) | |  |  |
| cg23550826 | PDGFRA | rs6554158 | 0.3913249 | 0.886089911 | 0.6238401 | 0.97 (0.9 - 1.04) | |  |  |
| cg22736323 | PDGFRA | rs55702239 | 0.4945352 | 0.913917741 | 0.5617089 | 0.97 (0.89 - 1.06) | |  |  |
| cg00022858 | PDGFRA | rs7673984 | 0.2408527 | 0.827367802 | 0.5748046 | 1.06 (0.96 - 1.18) | |  |  |
| cg02273436 | PDGFRA | rs7656613 | 0.1154928 | 0.718800827 | 0.8247821 | 1.03 (0.99 - 1.07) | |  |  |
| cg21309167 | PDGFRA | rs1316926 | 0.8579313 | 0.985325924 | 0.1129035 | 1 (0.98 - 1.03) | |  |  |
| cg25064395 | PDGFRA | rs7656613 | 0.1200503 | 0.724378819 | 0.7365681 | 1.06 (0.98 - 1.15) | |  |  |
| cg06483432 | KIT | rs34269143 | 0.3782958 | 0.880717157 | 0.2005587 | 0.96 (0.88 - 1.05) | |  |  |
| cg18836493 | KIT | rs3819393 | 0.1221646 | 0.727444126 | 0.6069532 | 1.04 (0.99 - 1.09) | |  |  |
| cg10742523 | KIT | rs2726620 | 0.8039593 | 0.974931075 | 0.7099294 | 1.01 (0.91 - 1.13) | |  |  |
| cg15947910 | KIT | rs2726631 | 0.8916863 | 0.989088558 | 0.4037271 | 1 (0.95 - 1.05) | |  |  |
| cg01447185 | SRD5A3 | rs11935857 | 0.8859434 | 0.987547606 | 0.6457987 | 1 (0.94 - 1.05) | |  |  |
| cg22060735 | SRD5A3 | rs36110240 | 0.9737151 | 0.997273118 | 0.8053753 | 1 (0.96 - 1.04) | |  |  |
| cg12555033 | SRD5A3 | rs12650678 | 0.9698115 | 0.997273118 | 0.229762 | 1 (0.89 - 1.13) | |  |  |
| cg25359981 | TECRL | rs75535750 | 0.1109614 | 0.713163853 | 0.7127285 | 1.03 (0.99 - 1.08) | |  |  |
| cg19508985 | UGT2A3 | rs182515314 | 0.5781583 | 0.933337911 | 0.7890595 | 1.01 (0.97 - 1.05) | |  |  |
| cg15878685 | UGT2A3 | rs115455627 | 0.3864078 | 0.883717069 | 0.1971253 | 0.96 (0.88 - 1.05) | |  |  |
| cg19045700 | UGT2A3 | rs115329518 | 0.3837552 | 0.882504364 | 0.2115478 | 0.98 (0.95 - 1.02) | |  |  |
| cg21844184 | UGT2B10 | rs4440295 | 0.3375597 | 0.867614935 | 0.3713222 | 0.98 (0.94 - 1.02) | |  |  |
| cg14236118 | SULT1E1 | rs72648500 | 0.8465212 | 0.983061649 | 0.4993054 | 0.99 (0.86 - 1.13) | |  |  |
| cg17136384 | SULT1E1 | rs78606590 | 0.6106188 | 0.940558433 | 0.868597 | 1.02 (0.93 - 1.12) | |  |  |
| cg25377865 | GC | rs6843222 | 0.7498896 | 0.96647031 | 0.4665945 | 0.99 (0.93 - 1.05) | |  |  |
| cg17429887 | GC | rs9291164 | 0.4039517 | 0.888413452 | 0.730738 | 0.97 (0.91 - 1.04) | |  |  |
| cg01807825 | GK2 | rs12509468 | 0.6672389 | 0.950857097 | 0.931077 | 0.98 (0.9 - 1.07) | |  |  |
| cg07938847 | PRKG2 | rs710838 | 0.9377692 | 0.994664173 | 0.3796676 | 1 (0.92 - 1.08) | |  |  |
| cg27147000 | SCD5 | rs1563647 | 0.1183567 | 0.721603775 | 0.3976002 | 0.95 (0.88 - 1.01) | |  |  |
| cg20740157 | SCD5 | rs72664723 | 0.1043265 | 0.707175673 | 0.6774733 | 0.94 (0.86 - 1.01) | |  |  |
| cg04073914 | AGPAT9 | rs56139069 | 0.7462367 | 0.965882508 | 0.1659384 | 1 (0.98 - 1.01) | |  |  |
| cg07775417 | AGPAT9 | rs1965464 | 0.2959103 | 0.855637872 | 0.3493608 | 0.95 (0.86 - 1.05) | |  |  |
| cg11818376 | AGPAT9 | rs4693656 | 0.3111147 | 0.85912998 | 0.9685739 | 1.03 (0.98 - 1.08) | |  |  |
| cg12999318 | CDS1 | rs112054519 | 0.3392005 | 0.868140958 | 0.2369685 | 0.93 (0.81 - 1.08) | |  |  |
| cg10737891 | CDS1 | rs72662978 | 0.6588323 | 0.948448217 | 0.3437238 | 0.97 (0.84 - 1.11) | |  |  |
| cg22884714 | CDS1 | rs11725539 | 0.05191313 | 0.630123075 | 0.6352372 | 1.07 (1 - 1.14) | |  |  |
| cg04673465 | CDS1 | rs13110728 | 0.2050526 | 0.802221799 | 0.2756863 | 0.95 (0.88 - 1.03) | |  |  |
| cg00324827 | MAPK10 | rs1201 | 0.7306327 | 0.963059146 | 0.4976632 | 1.01 (0.96 - 1.05) | |  |  |
| cg02045669 | MAPK10 | rs72665712 | 0.1128134 | 0.715665505 | 0.1612267 | 1.07 (0.98 - 1.17) | |  |  |
| cg10062316 | HSD17B13 | rs9991501 | 0.1327241 | 0.736839398 | 0.5258796 | 1.15 (0.96 - 1.39) | |  |  |
| cg23841344 | HSD17B11 | rs28406846 | 0.9803815 | 0.99749749 | 0.1510618 | 1 (0.96 - 1.04) | |  |  |
| cg04886981 | HPGDS | rs6823404 | 0.9844899 | 0.997692648 | 0.8175726 | 1 (0.95 - 1.06) | |  |  |
| cg10590622 | PDHA2 | rs1076860 | 0.1107237 | 0.713163853 | 8.10574E-05 | 1.01 (1 - 1.03) | |  |  |
| cg03925149 | PDHA2 | rs4699472 | 0.008977558 | 0.428723076 | 0.005183904 | 0.88 (0.81 - 0.97) | |  |  |
| cg06045062 | ADH5 | rs1154401 | 0.7144063 | 0.960151552 | 0.999732 | 1.02 (0.92 - 1.13) | |  |  |
| cg08178063 | ADH4 | rs139034643 | 0.5960041 | 0.936437734 | 0.6355788 | 0.98 (0.89 - 1.07) | |  |  |
| cg12011299 | ADH4 | rs1800759 | 0.8137369 | 0.976406452 | 0.8550778 | 1 (0.99 - 1.02) | |  |  |
| cg06518271 | ADH6 | rs4147532 | 0.2795944 | 0.84814535 | 0.8339807 | 1.05 (0.96 - 1.14) | |  |  |
| cg08988543 | ADH6 | rs16996598 | 0.9054308 | 0.990828994 | 0.8450771 | 1 (0.94 - 1.07) | |  |  |
| cg23949936 | ADH1A | rs6858148 | 0.8351587 | 0.98064716 | 0.9177456 | 1.01 (0.91 - 1.12) | |  |  |
| cg03806087 | ADH1A | rs6532795 | 0.9981752 | 0.99964059 | 0.7812939 | 1 (0.9 - 1.11) |  |  |  |
| cg15395354 | ADH1B | rs12644388 | 0.6789578 | 0.953554056 | 0.8803514 | 1.02 (0.92 - 1.13) | |  |  |
| cg05641529 | ADH1B | rs1391088 | 0.05690787 | 0.639416935 | 0.1536286 | 0.9 (0.8 - 1) |  |  |  |
| cg15785860 | ADH1C | rs78744403 | 0.01420481 | 0.483849653 | 0.003435613 | 0.9 (0.82 - 0.98) | |  |  |
| cg07485423 | ADH1C | rs284781 | 0.3423942 | 0.869637652 | 0.7905971 | 0.99 (0.98 - 1.01) | |  |  |
| cg07830103 | NFKB1 | rs2903282 | 0.1391212 | 0.741800351 | 0.05819219 | 0.91 (0.81 - 1.03) | |  |  |
| cg09390974 | NFKB1 | rs980455 | 0.0642425 | 0.653083432 | 0.05552983 | 0.97 (0.94 - 1) | |  |  |
| cg15409712 | NFKB1 | rs3774933 | 0.06444293 | 0.653905655 | 0.04688222 | 0.97 (0.93 - 1) | |  |  |
| cg00790535 | NFKB1 | rs138855842 | 0.6159108 | 0.941100158 | 0.3482062 | 1.03 (0.93 - 1.13) | |  |  |
| cg03276883 | BDH2 | rs6825519 | 0.1595194 | 0.762855257 | 0.4411869 | 0.93 (0.84 - 1.03) | |  |  |
| cg00681321 | BDH2 | rs2623070 | 0.1258503 | 0.730661207 | 0.01487017 | 1.06 (0.98 - 1.15) | |  |  |
| cg02726377 | SGMS2 | rs7665836 | 0.6013782 | 0.937894714 | 0.1176015 | 1.02 (0.96 - 1.07) | |  |  |
| cg00718036 | SGMS2 | rs11722403 | 0.5034464 | 0.916265211 | 0.1057236 | 1.03 (0.95 - 1.1) | |  |  |
| cg17108430 | SGMS2 | rs11722403 | 0.5041194 | 0.916317278 | 0.2025695 | 1.03 (0.94 - 1.14) | |  |  |
| cg15700776 | CYP2U1 | rs6835503 | 0.08289002 | 0.683223114 | 0.7756947 | 1.03 (1 - 1.06) | |  |  |
| cg25054154 | CYP2U1 | rs4956031 | 0.08715761 | 0.69099735 | 0.8931683 | 1.03 (1 - 1.07) | |  |  |
| cg01573501 | HADH | rs74407047 | 0.5441926 | 0.925187746 | 0.1777825 | 1.04 (0.92 - 1.18) | |  |  |
| cg12168535 | HADH | rs13115879 | 0.05365332 | 0.634496461 | 0.06219984 | 1.1 (1 - 1.22) |  |  |  |
| cg08267141 | SEC24B | rs11933904 | 0.2189303 | 0.814595212 | 0.4546697 | 1.17 (0.91 - 1.49) | |  |  |
| cg18274325 | PLA2G12A | rs7439493 | 0.213963 | 0.810397797 | 0.3305572 | 1.08 (0.96 - 1.22) | |  |  |
| cg16243646 | PLA2G12A | rs72674868 | 0.2058789 | 0.802781281 | 0.2077058 | 1.04 (0.98 - 1.11) | |  |  |
| cg13379236 | EGF | rs11568904 | 0.727103 | 0.962824869 | 0.3160742 | 1.02 (0.91 - 1.15) | |  |  |
| cg10269431 | EGF | rs2282785 | 0.3957083 | 0.886946389 | 0.332027 | 1.01 (0.98 - 1.05) | |  |  |
| cg06981781 | EGF | rs2282785 | 0.3958614 | 0.886947515 | 0.3669835 | 1.02 (0.98 - 1.06) | |  |  |
| cg06591011 | ELOVL6 | rs17540619 | 0.3522238 | 0.872055283 | 0.8092476 | 0.98 (0.93 - 1.03) | |  |  |
| cg17140673 | ELOVL6 | rs11098071 | 0.9132774 | 0.991697329 | 0.172896 | 1 (0.92 - 1.1) |  |  |  |
| cg21967637 | ARSJ | rs7437952 | 0.2669877 | 0.841380897 | 0.6214386 | 1.04 (0.97 - 1.1) | |  |  |
| cg16701124 | UGT8 | rs62309868 | 0.2366514 | 0.824654783 | 0.5822727 | 1.06 (0.96 - 1.18) | |  |  |
| cg24941603 | UGT8 | rs28657376 | 0.09788568 | 0.703912861 | 0.4953648 | 0.98 (0.96 - 1) | |  |  |
| cg18408273 | UGT8 | rs75730728 | 0.8837833 | 0.987421495 | 0.4462429 | 1 (0.94 - 1.07) | |  |  |
| cg22609233 | UGT8 | rs11098260 | 0.9712478 | 0.997273118 | 0.2904222 | 1 (0.93 - 1.08) | |  |  |
| cg11950778 | UGT8 | rs10008981 | 0.3054479 | 0.857248999 | 0.841284 | 1.05 (0.96 - 1.14) | |  |  |
| cg14228332 | SEC24D | rs56042726 | 0.8070599 | 0.975294252 | 0.07706373 | 0.99 (0.94 - 1.05) | |  |  |
| cg21605333 | SEC24D | rs17515340 | 0.1374919 | 0.739635827 | 0.09023504 | 1.09 (0.97 - 1.23) | |  |  |
| cg00817502 | SEC24D | rs35748313 | 0.6777758 | 0.953302966 | 0.1611255 | 1.02 (0.93 - 1.12) | |  |  |
| cg10518961 | SEC24D | rs2052769 | 0.5012909 | 0.915880913 | 0.5777079 | 0.96 (0.85 - 1.08) | |  |  |
| cg11663691 | SEC24D | rs2052769 | 0.4984014 | 0.915019518 | 0.2250346 | 1.01 (0.99 - 1.02) | |  |  |
| cg02775129 | SEC24D | rs1365548 | 0.07705523 | 0.673224049 | 0.6407618 | 1.02 (1 - 1.05) | |  |  |
| cg19577080 | INPP4B | rs67078907 | 0.7005098 | 0.957954325 | 0.5761647 | 0.98 (0.9 - 1.07) | |  |  |
| cg18376497 | INPP4B | rs72726477 | 0.5030825 | 0.916214408 | 0.07807547 | 0.98 (0.91 - 1.05) | |  |  |
| cg06176987 | INPP4B | rs80226754 | 0.3214677 | 0.862196967 | 0.07871226 | 0.99 (0.96 - 1.01) | |  |  |
| cg22031873 | INPP4B | rs10029622 | 0.6512018 | 0.946783864 | 0.9970154 | 0.99 (0.94 - 1.04) | |  |  |
| cg03476007 | INPP4B | rs1444949 | 0.4393348 | 0.899263816 | 0.8045942 | 0.98 (0.92 - 1.04) | |  |  |
| cg01601573 | GAB1 | rs300894 | 0.3904115 | 0.886057526 | 0.446656 | 1.02 (0.98 - 1.05) | |  |  |
| cg22650648 | GAB1 | rs78591363 | 0.7947455 | 0.97318727 | 0.6374012 | 0.99 (0.95 - 1.04) | |  |  |
| cg09355803 | GAB1 | rs568685 | 0.6373416 | 0.945086197 | 0.4700818 | 0.98 (0.9 - 1.07) | |  |  |
| cg06855485 | GAB1 | rs3805247 | 0.09085425 | 0.697391327 | 0.4941885 | 0.96 (0.93 - 1.01) | |  |  |
| cg19518666 | PDGFC | rs6819797 | 0.2494281 | 0.832463675 | 0.3574104 | 0.96 (0.9 - 1.03) | |  |  |
| cg24157598 | NPY1R | rs4271963 | 0.1755246 | 0.775804468 | 0.8686618 | 1.08 (0.97 - 1.21) | |  |  |
| cg17084007 | MSMO1 | rs183159416 | 0.157855 | 0.761121467 | 0.6711076 | 1.09 (0.97 - 1.22) | |  |  |
| cg03845745 | CBR4 | rs6839909 | 0.2218622 | 0.816257756 | 0.6555169 | 1.09 (0.95 - 1.25) | |  |  |
| cg21985951 | CBR4 | rs28371817 | 0.8569186 | 0.985006713 | 0.53885 | 1.01 (0.89 - 1.16) | |  |  |
| cg00020991 | CBR4 | rs28421942 | 0.2682395 | 0.842439403 | 0.3692239 | 1.05 (0.96 - 1.14) | |  |  |
| cg21133433 | CBR4 | rs1902942 | 0.5780348 | 0.933267493 | 0.6092709 | 0.96 (0.83 - 1.11) | |  |  |
| cg05527430 | HPGD | rs2612672 | 0.873624 | 0.986724534 | 0.7578535 | 1 (0.95 - 1.07) | |  |  |
| cg04555941 | HPGD | rs1426945 | 0.9511257 | 0.996245208 | 0.7882105 | 1 (0.97 - 1.03) | |  |  |
| cg01084566 | HPGD | rs1426945 | 0.9511257 | 0.996245208 | 0.7669192 | 1 (0.97 - 1.03) | |  |  |
| cg20455617 | HPGD | rs3756273 | 0.9849597 | 0.997812055 | 0.7918185 | 1 (0.94 - 1.07) | |  |  |
| cg10332003 | ENPP6 | rs1921564 | 0.3330405 | 0.865977956 | 0.7931189 | 0.98 (0.94 - 1.02) | |  |  |
| cg00691974 | ENPP6 | rs1882332 | 0.8863324 | 0.987678589 | 0.9572976 | 1.01 (0.93 - 1.08) | |  |  |
| cg24721647 | ACSL1 | rs34277324 | 0.2909312 | 0.852988484 | 0.7238126 | 0.95 (0.86 - 1.04) | |  |  |
| cg20823481 | ACSL1 | rs34277324 | 0.286651 | 0.851434289 | 0.7253741 | 0.97 (0.92 - 1.02) | |  |  |
| cg00372249 | ACSL1 | rs34277324 | 0.285437 | 0.851128133 | 0.8095634 | 0.98 (0.95 - 1.02) | |  |  |
| cg20410192 | ACSL1 | rs112231838 | 0.3797496 | 0.881250655 | 0.09363269 | 0.97 (0.91 - 1.04) | |  |  |
| cg07942479 | ACSL1 | rs6857027 | 0.1418158 | 0.745123529 | 0.7688032 | 0.95 (0.89 - 1.02) | |  |  |
| cg19784848 | SDHA | rs3756715 | 0.6356467 | 0.94473796 | 0.7225817 | 0.99 (0.93 - 1.05) | |  |  |
| cg18366108 | SDHA | rs10066474 | 0.4771031 | 0.908651724 | 0.9222158 | 0.95 (0.84 - 1.08) | |  |  |
| cg01128531 | AHRR | rs10079128 | 0.4615586 | 0.904743358 | 0.4377073 | 0.99 (0.96 - 1.02) | |  |  |
| cg06047773 | AHRR | rs150400588 | 0.2652335 | 0.840584398 | 0.8779764 | 1.07 (0.95 - 1.19) | |  |  |
| cg03569073 | AHRR | rs2672730 | 0.4264369 | 0.894563074 | 0.6222165 | 1.03 (0.95 - 1.12) | |  |  |
| cg16081854 | AHRR | rs13163118 | 0.888894 | 0.98838547 | 0.3080969 | 1 (0.98 - 1.02) | |  |  |
| cg17310215 | AHRR | rs12520059 | 0.9589604 | 0.996245208 | 0.4908367 | 1 (0.91 - 1.1) |  |  |  |
| cg18584368 | AHRR | rs1574220 | 0.8147402 | 0.976406452 | 0.5038857 | 0.98 (0.84 - 1.15) | |  |  |
| cg00300637 | AHRR | rs76740326 | 0.4442232 | 0.900380798 | 0.4500154 | 0.98 (0.94 - 1.03) | |  |  |
| cg09470163 | AHRR | rs2162869 | 0.3669141 | 0.87782952 | 0.8399648 | 0.97 (0.92 - 1.03) | |  |  |
| cg01970407 | AHRR | rs3756712 | 0.4399057 | 0.899424295 | 0.6856087 | 1.04 (0.95 - 1.14) | |  |  |
| cg17924476 | AHRR | rs2277055 | 0.8530998 | 0.984205111 | 0.5979534 | 1.01 (0.94 - 1.07) | |  |  |
| cg23067299 | AHRR | rs12519909 | 0.3342729 | 0.866783394 | 0.835121 | 1.05 (0.95 - 1.17) | |  |  |
| cg08606254 | AHRR | rs2672730 | 0.4256378 | 0.894464203 | 0.3293801 | 1.03 (0.96 - 1.09) | |  |  |
| cg25004427 | AHRR | rs56179436 | 0.74185 | 0.965210787 | 0.2347068 | 1.02 (0.92 - 1.12) | |  |  |
| cg09078014 | AHRR | rs62346511 | 0.869661 | 0.986468706 | 0.5215311 | 1.01 (0.92 - 1.11) | |  |  |
| cg14714797 | AHRR | rs59452511 | 0.2463586 | 0.830530612 | 0.4983061 | 0.96 (0.9 - 1.03) | |  |  |
| cg09338136 | AHRR | rs79631443 | 0.5586576 | 0.929377359 | 0.3024648 | 0.99 (0.95 - 1.03) | |  |  |
| cg16371648 | AHRR | rs6898697 | 0.8529683 | 0.984205111 | 0.2598446 | 1 (0.98 - 1.02) | |  |  |
| cg24688690 | AHRR | rs6555193 | 0.8283806 | 0.97932502 | 0.2772062 | 1.01 (0.93 - 1.09) | |  |  |
| cg08858540 | AHRR | rs6898697 | 0.8529722 | 0.984205111 | 0.2249728 | 1 (0.97 - 1.04) | |  |  |
| cg09084391 | AHRR | rs4957030 | 0.8660899 | 0.985863126 | 0.1787077 | 1 (0.96 - 1.03) | |  |  |
| cg04135110 | AHRR | rs3734145 | 0.3658216 | 0.87768262 | 0.295357 | 1.01 (0.99 - 1.03) | |  |  |
| cg24980413 | AHRR | rs3734145 | 0.3659556 | 0.877714444 | 0.1851056 | 1.01 (0.99 - 1.04) | |  |  |
| cg17048538 | AHRR | rs2671916 | 0.4544517 | 0.903184062 | 0.3377075 | 0.99 (0.96 - 1.02) | |  |  |
| cg23953254 | AHRR | rs2721040 | 0.4547261 | 0.903253628 | 0.2385901 | 0.98 (0.94 - 1.03) | |  |  |
| cg12806681 | AHRR | rs150400588 | 0.258031 | 0.836399158 | 0.7296445 | 1.02 (0.98 - 1.06) | |  |  |
| cg03991871 | AHRR | rs150400588 | 0.2577991 | 0.836348785 | 0.5378962 | 1.02 (0.99 - 1.06) | |  |  |
| cg23916896 | AHRR | rs77111113 | 0.336739 | 0.867614935 | 0.9260952 | 0.96 (0.89 - 1.04) | |  |  |
| cg11902777 | AHRR | rs11744131 | 0.3477527 | 0.871431694 | 0.803265 | 0.98 (0.93 - 1.03) | |  |  |
| cg12202185 | AHRR | rs11737917 | 0.341587 | 0.869086657 | 0.760723 | 0.98 (0.93 - 1.03) | |  |  |
| cg01899089 | AHRR | rs75687593 | 0.342537 | 0.869689834 | 0.8003844 | 0.96 (0.88 - 1.05) | |  |  |
| cg23576855 | AHRR | rs11737917 | 0.3401004 | 0.868258695 | 0.6317606 | 1.01 (0.99 - 1.02) | |  |  |
| cg05575921 | AHRR | rs2672723 | 0.3540352 | 0.872538819 | 0.8965062 | 0.94 (0.84 - 1.07) | |  |  |
| cg22356527 | AHRR | rs2672723 | 0.3514498 | 0.872055283 | 0.8509626 | 1.05 (0.95 - 1.15) | |  |  |
| cg04021706 | AHRR | rs11742957 | 0.7454409 | 0.965761902 | 0.7132302 | 1.01 (0.93 - 1.1) | |  |  |
| cg06678548 | AHRR | rs11742957 | 0.7453378 | 0.965761902 | 0.6490248 | 1.01 (0.95 - 1.08) | |  |  |
| cg15168497 | AHRR | rs2721011 | 0.3720865 | 0.87916487 | 0.8393565 | 1.01 (0.99 - 1.03) | |  |  |
| cg14817490 | AHRR | rs2466287 | 0.7216356 | 0.961495026 | 0.2316826 | 1.02 (0.92 - 1.13) | |  |  |
| cg17287155 | AHRR | rs115628399 | 0.998572 | 0.999688363 | 0.3024598 | 1 (0.92 - 1.09) | |  |  |
| cg04551776 | AHRR | rs56245862 | 0.2934602 | 0.854266167 | 0.0430316 | 0.94 (0.83 - 1.06) | |  |  |
| cg25648203 | AHRR | rs2672723 | 0.3513328 | 0.872055283 | 0.9771548 | 0.96 (0.87 - 1.05) | |  |  |
| cg11894422 | AHRR | rs2672750 | 0.341833 | 0.869218888 | 0.8438638 | 0.97 (0.92 - 1.03) | |  |  |
| cg17248487 | AHRR | rs4957026 | 0.4692753 | 0.907052044 | 0.4562182 | 0.96 (0.87 - 1.06) | |  |  |
| cg03604011 | AHRR | rs4957030 | 0.8660928 | 0.985863126 | 0.1269266 | 1 (0.96 - 1.05) | |  |  |
| cg22698028 | AHRR | rs2672723 | 0.3487867 | 0.871671988 | 0.6566993 | 1.03 (0.97 - 1.09) | |  |  |
| cg17401179 | AHRR | rs11134017 | 0.3216628 | 0.862221031 | 0.6226379 | 1.02 (0.98 - 1.06) | |  |  |
| cg24090911 | AHRR | rs2010135 | 0.3514082 | 0.872055283 | 0.471576 | 1.05 (0.95 - 1.15) | |  |  |
| cg05527650 | AHRR | rs11740891 | 0.9516776 | 0.996245208 | 0.4021062 | 1 (0.94 - 1.07) | |  |  |
| cg05597431 | AHRR | rs144548505 | 0.2008511 | 0.79907412 | 0.4783691 | 1.04 (0.98 - 1.11) | |  |  |
| cg08238319 | AHRR | rs11743226 | 0.2242771 | 0.816922402 | 0.5969877 | 0.99 (0.97 - 1.01) | |  |  |
| cg02385153 | AHRR | rs11740668 | 0.2105752 | 0.807755727 | 0.3701161 | 0.93 (0.82 - 1.04) | |  |  |
| cg07599136 | AHRR | rs2466287 | 0.7212933 | 0.961495026 | 0.3735837 | 1.01 (0.98 - 1.04) | |  |  |
| cg09078081 | AHRR | rs2466287 | 0.7214913 | 0.961495026 | 0.4173185 | 1.01 (0.94 - 1.1) | |  |  |
| cg26076054 | AHRR | rs115313441 | 0.8304156 | 0.979679436 | 0.8999792 | 1 (0.96 - 1.03) | |  |  |
| cg12251573 | AHRR | rs10068732 | 0.8891554 | 0.988562967 | 0.532823 | 1 (0.96 - 1.05) | |  |  |
| cg00976097 | AHRR | rs115313441 | 0.8304173 | 0.979679436 | 0.9244127 | 1 (0.96 - 1.04) | |  |  |
| cg24891125 | AHRR | rs6880143 | 0.1296184 | 0.734159084 | 0.1408703 | 0.87 (0.73 - 1.04) | |  |  |
| cg14854287 | AHRR | rs11743825 | 0.7090097 | 0.959271339 | 0.4501409 | 1.01 (0.94 - 1.09) | |  |  |
| cg21144161 | AHRR | rs72717415 | 0.7455723 | 0.965761902 | 0.4438192 | 1.01 (0.96 - 1.06) | |  |  |
| cg09584122 | AHRR | rs77682090 | 0.1399059 | 0.743156754 | 0.371583 | 1.1 (0.97 - 1.25) | |  |  |
| cg05516328 | AHRR | rs116968791 | 0.1163726 | 0.720107842 | 0.4396843 | 1.04 (0.99 - 1.08) | |  |  |
| cg26850624 | AHRR | rs72717415 | 0.745522 | 0.965761902 | 0.3469677 | 1 (0.97 - 1.02) | |  |  |
| cg10841124 | AHRR | rs72717423 | 0.6861944 | 0.954950662 | 0.7235331 | 0.98 (0.88 - 1.09) | |  |  |
| cg22951524 | AHRR | rs72717423 | 0.6856644 | 0.954724977 | 0.9402292 | 0.99 (0.96 - 1.03) | |  |  |
| cg14448919 | AHRR | rs72698504 | 0.5752532 | 0.932300038 | 0.7868429 | 0.97 (0.86 - 1.09) | |  |  |
| cg16336872 | AHRR | rs72717423 | 0.6856852 | 0.954728033 | 0.9632553 | 0.99 (0.95 - 1.03) | |  |  |
| cg21972741 | AHRR | rs957791 | 0.6466877 | 0.94603711 | 0.1927683 | 0.99 (0.93 - 1.05) | |  |  |
| cg26954197 | AHRR | rs72717418 | 0.5382149 | 0.922827354 | 0.8456555 | 0.96 (0.86 - 1.08) | |  |  |
| cg06755258 | LPCAT1 | rs13089 | 0.9931609 | 0.998800437 | 0.6677193 | 1 (0.98 - 1.02) | |  |  |
| cg13982541 | LPCAT1 | rs2277007 | 0.920343 | 0.992685898 | 0.400521 | 1 (0.97 - 1.03) | |  |  |
| cg07148919 | LPCAT1 | rs2962065 | 0.5639147 | 0.930212284 | 0.5438393 | 1.01 (0.99 - 1.02) | |  |  |
| cg04723886 | LPCAT1 | rs4975647 | 0.4898965 | 0.912292199 | 0.8142409 | 1.03 (0.94 - 1.14) | |  |  |
| cg01945913 | LPCAT1 | rs72717518 | 0.1670491 | 0.769563782 | 0.6141991 | 1.09 (0.97 - 1.23) | |  |  |
| cg07151155 | LPCAT1 | rs27053 | 0.461809 | 0.904743358 | 0.2647444 | 1.01 (0.99 - 1.03) | |  |  |
| cg02661034 | LPCAT1 | rs27056 | 0.4953861 | 0.913980735 | 0.4690426 | 1.02 (0.97 - 1.06) | |  |  |
| cg17685115 | LPCAT1 | rs10079871 | 0.2729464 | 0.84499581 | 0.8823868 | 0.97 (0.93 - 1.02) | |  |  |
| cg18191138 | LPCAT1 | rs1032752 | 0.3784395 | 0.880717157 | 0.4459112 | 0.97 (0.91 - 1.03) | |  |  |
| cg08697251 | LPCAT1 | rs9800090 | 0.6259882 | 0.943323208 | 0.1736151 | 1.03 (0.92 - 1.14) | |  |  |
| cg16272981 | LPCAT1 | rs9800090 | 0.6257298 | 0.943316678 | 0.193561 | 1.02 (0.93 - 1.12) | |  |  |
| cg00857851 | LPCAT1 | rs72717530 | 0.3701153 | 0.878471335 | 0.7634075 | 1.06 (0.94 - 1.19) | |  |  |
| cg00256485 | LPCAT1 | rs112810178 | 0.4088845 | 0.889808154 | 0.9018785 | 1.06 (0.93 - 1.21) | |  |  |
| cg09849319 | LPCAT1 | rs112810178 | 0.4056483 | 0.889035042 | 0.8457179 | 1.03 (0.96 - 1.11) | |  |  |
| cg05661533 | LPCAT1 | rs72717531 | 0.3608288 | 0.875455705 | 0.8760945 | 1.04 (0.96 - 1.12) | |  |  |
| cg07902156 | LPCAT1 | rs1032751 | 0.7727999 | 0.968475613 | 0.665245 | 1.01 (0.96 - 1.06) | |  |  |
| cg22894329 | LPCAT1 | rs3733797 | 0.1476397 | 0.751124071 | 0.7621882 | 1.04 (0.98 - 1.11) | |  |  |
| cg03562952 | LPCAT1 | rs36987 | 0.5435387 | 0.924886044 | 0.3335672 | 0.98 (0.91 - 1.05) | |  |  |
| cg26675379 | LPCAT1 | rs10058381 | 0.472309 | 0.908044627 | 0.556791 | 1.01 (0.98 - 1.05) | |  |  |
| cg22938488 | LPCAT1 | rs7706238 | 0.2777596 | 0.847568792 | 0.6771197 | 1.05 (0.96 - 1.14) | |  |  |
| cg21964798 | LPCAT1 | rs36982 | 0.5468625 | 0.925840251 | 0.4782759 | 0.97 (0.89 - 1.06) | |  |  |
| cg00287915 | LPCAT1 | rs36984 | 0.4394331 | 0.899263816 | 0.04410927 | 0.98 (0.93 - 1.03) | |  |  |
| cg05255351 | LPCAT1 | rs36980 | 0.550353 | 0.92637421 | 0.2482169 | 0.98 (0.91 - 1.05) | |  |  |
| cg09885622 | LPCAT1 | rs36987 | 0.5430208 | 0.924607643 | 0.3262732 | 0.99 (0.95 - 1.03) | |  |  |
| cg07035602 | LPCAT1 | rs7735915 | 0.3935775 | 0.886657389 | 0.4074163 | 1.05 (0.94 - 1.18) | |  |  |
| cg15200711 | LPCAT1 | rs36968 | 0.4559524 | 0.903517607 | 0.06956665 | 0.98 (0.94 - 1.03) | |  |  |
| cg08943467 | LPCAT1 | rs2962041 | 0.3614263 | 0.875690193 | 0.3994648 | 0.99 (0.95 - 1.02) | |  |  |
| cg14049990 | LPCAT1 | rs7737853 | 0.07286112 | 0.668436654 | 0.45009 | 1.11 (0.99 - 1.25) | |  |  |
| cg20962974 | LPCAT1 | rs74678824 | 0.2627298 | 0.838812991 | 0.3531714 | 1.04 (0.97 - 1.11) | |  |  |
| cg22185977 | LPCAT1 | rs7700354 | 0.1522133 | 0.755550413 | 0.2958977 | 1.03 (0.99 - 1.06) | |  |  |
| cg05573654 | LPCAT1 | rs13160153 | 0.1762786 | 0.77637069 | 0.4138515 | 1.03 (0.99 - 1.07) | |  |  |
| cg26934362 | LPCAT1 | rs4406174 | 0.5317993 | 0.921986842 | 0.3195761 | 0.98 (0.91 - 1.05) | |  |  |
| cg02531924 | LPCAT1 | rs4596428 | 0.8795442 | 0.986942168 | 0.01765232 | 0.99 (0.92 - 1.08) | |  |  |
| cg08794582 | LPCAT1 | rs73735515 | 0.01171896 | 0.461544182 | 0.01038521 | 1.19 (1.04 - 1.37) | |  |  |
| cg24618694 | LPCAT1 | rs75762613 | 0.01039007 | 0.448758924 | 0.003279304 | 0.85 (0.75 - 0.96) | |  |  |
| cg05365670 | LPCAT1 | rs6863842 | 0.01144609 | 0.459349878 | 0.006659595 | 1.08 (1.02 - 1.14) | |  |  |
| cg06940720 | LPCAT1 | rs6863842 | 0.01418896 | 0.483849653 | 0.01611608 | 1.14 (1.03 - 1.27) | |  |  |
| cg21057643 | MED10 | rs12656713 | 0.417186 | 0.892302816 | 0.8296178 | 0.96 (0.85 - 1.07) | |  |  |
| cg10459717 | SRD5A1 | rs114952812 | 0.2558641 | 0.835591874 | 0.8733997 | 0.95 (0.88 - 1.04) | |  |  |
| cg23974739 | SRD5A1 | rs8192139 | 0.3123416 | 0.85912998 | 0.9371462 | 0.97 (0.92 - 1.03) | |  |  |
| cg24904943 | ADCY2 | rs73045491 | 0.4085336 | 0.889808154 | 0.8542518 | 1.02 (0.97 - 1.07) | |  |  |
| cg21633134 | ADCY2 | rs13165346 | 0.1637213 | 0.765640921 | 0.8687524 | 0.92 (0.82 - 1.03) | |  |  |
| cg07624977 | MTMR12 | rs55761222 | 0.2234635 | 0.816616175 | 0.1813159 | 1.06 (0.97 - 1.16) | |  |  |
| cg26893816 | AMACR | rs173781 | 0.2479554 | 0.831375306 | 0.333112 | 1.03 (0.98 - 1.09) | |  |  |
| cg04596544 | AMACR | rs40507 | 0.1695387 | 0.771199449 | 0.5370475 | 1.09 (0.96 - 1.24) | |  |  |
| cg18397975 | AMACR | rs253201 | 0.3072899 | 0.857803312 | 0.1651208 | 1.04 (0.96 - 1.14) | |  |  |
| cg02828928 | AMACR | rs190418 | 0.1614635 | 0.764387082 | 0.6544294 | 0.97 (0.93 - 1.01) | |  |  |
| cg00516582 | AGXT2 | rs11960801 | 0.3054205 | 0.857248999 | 0.8381693 | 1.02 (0.99 - 1.05) | |  |  |
| cg21149357 | HMGCS1 | rs56071328 | 0.5405105 | 0.923762551 | 0.01920435 | 1.01 (0.99 - 1.02) | |  |  |
| cg19844283 | GPX8 | rs193105 | 0.9683785 | 0.997146439 | 0.6462486 | 1 (0.95 - 1.05) | |  |  |
| cg01595951 | PPAP2A | rs4865970 | 0.3445442 | 0.870160803 | 0.5678632 | 0.95 (0.85 - 1.06) | |  |  |
| cg07144408 | PPAP2A | rs10068807 | 0.7554463 | 0.966870715 | 0.1535674 | 0.98 (0.88 - 1.1) | |  |  |
| cg16298547 | ELOVL7 | rs10057004 | 0.8792883 | 0.986942168 | 0.5546342 | 0.99 (0.92 - 1.08) | |  |  |
| cg15134801 | ELOVL7 | rs35453042 | 0.8058614 | 0.975123724 | 0.6460012 | 0.99 (0.94 - 1.05) | |  |  |
| cg22104242 | ELOVL7 | rs295555 | 0.207716 | 0.804212699 | 0.2740256 | 0.94 (0.87 - 1.03) | |  |  |
| cg01679081 | ELOVL7 | rs10057004 | 0.8792845 | 0.986942168 | 0.6614963 | 0.99 (0.93 - 1.07) | |  |  |
| cg02320003 | ELOVL7 | rs17388949 | 0.581373 | 0.933806176 | 0.6518776 | 0.97 (0.89 - 1.07) | |  |  |
| cg01317569 | ELOVL7 | rs158930 | 0.1097736 | 0.712026971 | 0.1798844 | 1.04 (0.99 - 1.1) | |  |  |
| cg22917366 | PIK3R1 | rs6899059 | 0.3751163 | 0.879785402 | 0.6296488 | 1.01 (0.99 - 1.03) | |  |  |
| cg03871267 | PIK3R1 | rs12188596 | 0.456999 | 0.90369255 | 0.6085626 | 0.98 (0.93 - 1.03) | |  |  |
| cg17780731 | PIK3R1 | rs12652394 | 0.5952566 | 0.93619936 | 0.6013339 | 0.98 (0.9 - 1.06) | |  |  |
| cg15611809 | PIK3R1 | rs6449955 | 0.886552 | 0.987678589 | 0.2256282 | 1.01 (0.9 - 1.13) | |  |  |
| cg15021292 | PIK3R1 | rs145427553 | 0.896603 | 0.990106178 | 0.1871006 | 1 (0.99 - 1.01) | |  |  |
| cg00559992 | PIK3R1 | rs72757693 | 0.8329885 | 0.980313496 | 0.09545027 | 0.99 (0.9 - 1.09) | |  |  |
| cg07208333 | PIK3R1 | rs10940161 | 0.5490827 | 0.925996596 | 0.1705278 | 0.96 (0.85 - 1.09) | |  |  |
| cg18405544 | PIK3R1 | rs451157 | 0.5837609 | 0.934773262 | 0.3171181 | 1.01 (0.98 - 1.03) | |  |  |
| cg27081745 | PIK3R1 | rs115742074 | 0.6626338 | 0.949921647 | 0.729677 | 1.02 (0.92 - 1.14) | |  |  |
| cg26183504 | PIK3R1 | rs12108976 | 0.6414662 | 0.94546956 | 0.9856177 | 1.02 (0.95 - 1.09) | |  |  |
| cg06433467 | PIK3R1 | rs116600738 | 0.8373403 | 0.980988313 | 0.8605809 | 1 (0.97 - 1.02) | |  |  |
| cg01303236 | HEXB | rs10473968 | 0.6118777 | 0.94084644 | 0.1073771 | 1.02 (0.95 - 1.1) | |  |  |
| cg03335624 | HEXB | rs6886768 | 0.3978302 | 0.887037757 | 0.04347534 | 1.01 (0.98 - 1.05) | |  |  |
| cg24949191 | HEXB | rs7445920 | 0.1183613 | 0.721603775 | 0.1167641 | 0.95 (0.9 - 1.01) | |  |  |
| cg05552569 | HEXB | rs820866 | 0.9545837 | 0.996245208 | 0.1113792 | 1 (0.93 - 1.07) | |  |  |
| cg11003009 | HMGCR | rs10515197 | 0.8220279 | 0.978213619 | 0.1296255 | 0.99 (0.91 - 1.08) | |  |  |
| cg26567688 | COL4A3BP | rs73120833 | 0.1623383 | 0.764549009 | 0.8001796 | 1.07 (0.97 - 1.17) | |  |  |
| cg10864794 | ARSB | rs56307340 | 0.3990811 | 0.887037757 | 0.5650624 | 1.03 (0.97 - 1.09) | |  |  |
| cg01026730 | ARSB | rs337889 | 0.2577534 | 0.836348785 | 0.9941776 | 1.02 (0.98 - 1.06) | |  |  |
| cg08393937 | ARSB | rs163130 | 0.6154441 | 0.941074865 | 0.9937278 | 0.99 (0.96 - 1.02) | |  |  |
| cg04677158 | ARSB | rs163125 | 0.4878198 | 0.911790703 | 0.986924 | 1.01 (0.98 - 1.04) | |  |  |
| cg11541897 | ARSB | rs163125 | 0.4879555 | 0.911851507 | 0.9871666 | 0.99 (0.94 - 1.03) | |  |  |
| cg24893837 | ARSB | rs163126 | 0.4163903 | 0.892164413 | 0.9848901 | 0.98 (0.94 - 1.03) | |  |  |
| cg26470338 | ARSB | rs163124 | 0.8845074 | 0.987464196 | 0.9306576 | 1 (0.98 - 1.03) | |  |  |
| cg25105617 | ARSB | rs42418 | 0.7385393 | 0.964496589 | 0.8192645 | 1 (0.98 - 1.03) | |  |  |
| cg00580752 | ACOT12 | rs4703516 | 0.6982945 | 0.957455844 | 0.3549802 | 1.01 (0.95 - 1.09) | |  |  |
| cg01277506 | ACOT12 | rs1366597 | 0.8995113 | 0.990455511 | 0.6540794 | 1 (0.95 - 1.06) | |  |  |
| cg17741014 | ACOT12 | rs1366597 | 0.899509 | 0.990455511 | 0.7324529 | 1 (0.96 - 1.04) | |  |  |
| cg21942082 | ACOT12 | rs6452406 | 0.9597844 | 0.996245208 | 0.8301573 | 1 (0.97 - 1.04) | |  |  |
| cg11137578 | ACOT12 | rs35003041 | 0.4020863 | 0.887644674 | 0.2219095 | 0.99 (0.96 - 1.02) | |  |  |
| cg01942845 | ACOT12 | rs35003041 | 0.4022761 | 0.887709118 | 0.2272452 | 0.98 (0.95 - 1.02) | |  |  |
| cg13674042 | STARD4 | rs17458866 | 0.631983 | 0.944551386 | 0.5378617 | 1.02 (0.95 - 1.09) | |  |  |
| cg05360402 | STARD4 | rs17458866 | 0.6317733 | 0.944551386 | 0.4767276 | 1.01 (0.96 - 1.06) | |  |  |
| cg11925263 | STARD4 | rs152877 | 0.8448429 | 0.982500792 | 0.5896012 | 1 (0.96 - 1.03) | |  |  |
| cg16397176 | STARD4 | rs73787351 | 0.06301342 | 0.648803816 | 0.07666353 | 0.92 (0.85 - 1) | |  |  |
| cg21069608 | STARD4 | rs6881268 | 0.08093166 | 0.678971386 | 0.9650518 | 0.98 (0.95 - 1) | |  |  |
| cg01810267 | TNFAIP8 | rs10900729 | 0.7313361 | 0.963155736 | 0.2079443 | 0.99 (0.94 - 1.04) | |  |  |
| cg18689486 | TNFAIP8 | rs10900729 | 0.7313858 | 0.963155736 | 0.2289992 | 0.99 (0.93 - 1.05) | |  |  |
| cg07376834 | TNFAIP8 | rs7704111 | 0.7321321 | 0.963155736 | 0.2316556 | 0.99 (0.92 - 1.06) | |  |  |
| cg03723497 | TNFAIP8 | rs7704111 | 0.732111 | 0.963155736 | 0.3303696 | 0.99 (0.93 - 1.05) | |  |  |
| cg21130861 | TNFAIP8 | rs7704111 | 0.7321448 | 0.963155736 | 0.2391681 | 0.99 (0.92 - 1.06) | |  |  |
| cg15408889 | TNFAIP8 | rs10035514 | 0.3348183 | 0.866861176 | 0.6164831 | 0.97 (0.9 - 1.03) | |  |  |
| cg27621513 | TNFAIP8 | rs1876736 | 0.4786642 | 0.908977432 | 0.3156182 | 0.96 (0.87 - 1.07) | |  |  |
| cg07398791 | TNFAIP8 | rs17450512 | 0.4243723 | 0.894382935 | 0.7988462 | 1.02 (0.97 - 1.07) | |  |  |
| cg04195774 | TNFAIP8 | rs10519585 | 0.294336 | 0.854808362 | 0.1590626 | 0.98 (0.93 - 1.02) | |  |  |
| cg00421693 | TNFAIP8 | rs73237292 | 0.6651219 | 0.950341888 | 0.737566 | 1.01 (0.97 - 1.06) | |  |  |
| cg07086380 | TNFAIP8 | rs10053031 | 0.3002909 | 0.857248999 | 0.6988138 | 1.06 (0.95 - 1.19) | |  |  |
| cg23985447 | TNFAIP8 | rs6860034 | 0.293729 | 0.854285127 | 0.6997135 | 1.05 (0.96 - 1.14) | |  |  |
| cg02283238 | TNFAIP8 | rs73237292 | 0.6652461 | 0.950357376 | 0.6908175 | 1.01 (0.95 - 1.08) | |  |  |
| cg24120357 | TNFAIP8 | rs250302 | 0.8356123 | 0.98064716 | 0.6630458 | 1 (0.96 - 1.05) | |  |  |
| cg16645133 | TNFAIP8 | rs250302 | 0.8356233 | 0.98064716 | 0.6861472 | 1.01 (0.95 - 1.07) | |  |  |
| cg19843939 | TNFAIP8 | rs250302 | 0.8356107 | 0.98064716 | 0.6431908 | 1 (0.96 - 1.05) | |  |  |
| cg20730253 | TNFAIP8 | rs250302 | 0.8356094 | 0.98064716 | 0.5785215 | 1 (0.97 - 1.04) | |  |  |
| cg23917399 | TNFAIP8 | rs250302 | 0.8356118 | 0.98064716 | 0.7065522 | 1 (0.96 - 1.05) | |  |  |
| cg10911160 | TNFAIP8 | rs250302 | 0.8356105 | 0.98064716 | 0.674937 | 1 (0.96 - 1.05) | |  |  |
| cg19893178 | TNFAIP8 | rs250302 | 0.8356224 | 0.98064716 | 0.6493046 | 1.01 (0.95 - 1.06) | |  |  |
| cg05191313 | HSD17B4 | rs6878373 | 0.2573389 | 0.836239292 | 0.5742819 | 1.07 (0.95 - 1.19) | |  |  |
| cg21878514 | HSD17B4 | rs463098 | 0.8016646 | 0.974700128 | 0.9136804 | 1.01 (0.91 - 1.12) | |  |  |
| cg22547559 | ALDH7A1 | rs6861395 | 0.3916036 | 0.886195129 | 0.3286429 | 1.04 (0.95 - 1.14) | |  |  |
| cg03409151 | ALDH7A1 | rs7719712 | 0.3110664 | 0.85912998 | 0.1276558 | 1.02 (0.98 - 1.06) | |  |  |
| cg25476565 | ALDH7A1 | rs56397023 | 0.3136591 | 0.859272423 | 0.1078907 | 1.03 (0.98 - 1.08) | |  |  |
| cg05689600 | ALDH7A1 | rs115920015 | 0.573129 | 0.931907475 | 0.1864475 | 0.98 (0.92 - 1.05) | |  |  |
| cg01814098 | ALDH7A1 | rs115920015 | 0.5741508 | 0.932092124 | 0.356292 | 0.97 (0.88 - 1.08) | |  |  |
| cg08675664 | ALDH7A1 | rs115920015 | 0.5732333 | 0.931942438 | 0.1687162 | 0.98 (0.91 - 1.05) | |  |  |
| cg26327732 | ALDH7A1 | rs77900059 | 0.1657585 | 0.768093476 | 0.0601397 | 0.95 (0.89 - 1.02) | |  |  |
| cg16738971 | ALDH7A1 | rs11960347 | 0.1622769 | 0.764549009 | 0.06755681 | 0.96 (0.92 - 1.01) | |  |  |
| cg17653368 | ALDH7A1 | rs11960347 | 0.1647248 | 0.766912237 | 0.04194727 | 0.95 (0.88 - 1.02) | |  |  |
| cg18670373 | ALDH7A1 | rs11960347 | 0.1679931 | 0.770323509 | 0.06123185 | 0.94 (0.85 - 1.03) | |  |  |
| cg08702413 | ALDH7A1 | rs11960347 | 0.1607678 | 0.764055366 | 0.1213209 | 0.98 (0.95 - 1.01) | |  |  |
| cg04200010 | ALDH7A1 | rs6883308 | 0.06124757 | 0.645848884 | 0.01974282 | 1.05 (1 - 1.1) |  |  |  |
| cg06998224 | SLC27A6 | rs4836407 | 0.3422999 | 0.869582695 | 0.6015161 | 0.96 (0.89 - 1.04) | |  |  |
| cg11933693 | SLC27A6 | rs965998 | 0.9924663 | 0.998751496 | 0.6460924 | 1 (0.9 - 1.11) |  |  |  |
| cg20103758 | SLC27A6 | rs10073185 | 0.07217102 | 0.667498098 | 0.5945494 | 0.93 (0.86 - 1.01) | |  |  |
| cg00076307 | SLC27A6 | rs11958304 | 0.3238441 | 0.862797422 | 0.3924381 | 0.95 (0.86 - 1.05) | |  |  |
| cg07421806 | SLC27A6 | rs146987260 | 0.1625109 | 0.764549009 | 0.8040508 | 0.91 (0.81 - 1.04) | |  |  |
| cg17391928 | SLC27A6 | rs2577427 | 0.1509173 | 0.754054497 | 0.8450897 | 0.95 (0.9 - 1.02) | |  |  |
| cg07103493 | SLC27A6 | rs2577427 | 0.1504856 | 0.753813924 | 0.8197133 | 0.96 (0.9 - 1.02) | |  |  |
| cg02841155 | SLC27A6 | rs2526252 | 0.151701 | 0.755010478 | 0.7176932 | 0.98 (0.95 - 1.01) | |  |  |
| cg25555059 | SLC27A6 | rs2577539 | 0.1838023 | 0.784946519 | 0.5646429 | 0.98 (0.95 - 1.01) | |  |  |
| cg02527190 | SLC27A6 | rs36192190 | 0.31054 | 0.85912998 | 0.2907054 | 0.94 (0.84 - 1.06) | |  |  |
| cg21474247 | ACSL6 | rs4706028 | 0.9156815 | 0.992236069 | 0.5023606 | 1 (0.93 - 1.08) | |  |  |
| cg06647332 | ACSL6 | rs924434 | 0.4657551 | 0.905708721 | 0.295931 | 1.01 (0.98 - 1.04) | |  |  |
| cg19734801 | ACSL6 | rs7733731 | 0.4664556 | 0.906031661 | 0.3176709 | 1.01 (0.98 - 1.05) | |  |  |
| cg06307176 | ACSL6 | rs58016983 | 0.4605052 | 0.904495878 | 0.3640599 | 1.01 (0.98 - 1.05) | |  |  |
| cg25547332 | ACSL6 | rs142958719 | 0.5180552 | 0.918405527 | 0.3156396 | 1.01 (0.98 - 1.05) | |  |  |
| cg01355876 | ACSL6 | rs4493667 | 0.440521 | 0.899545352 | 0.3358846 | 1.02 (0.97 - 1.07) | |  |  |
| cg02257405 | ACSL6 | rs440970 | 0.1881884 | 0.788564667 | 0.212782 | 0.92 (0.82 - 1.04) | |  |  |
| cg19040266 | SLC22A5 | rs200838 | 0.6698368 | 0.951184402 | 0.5688068 | 1.01 (0.95 - 1.08) | |  |  |
| cg02463029 | VDAC1 | rs76538181 | 0.369795 | 0.878446011 | 0.8680286 | 1.03 (0.96 - 1.1) | |  |  |
| cg13371777 | PPP2CA | rs10463914 | 0.1159082 | 0.719395205 | 0.6534112 | 0.97 (0.92 - 1.01) | |  |  |
| cg14558566 | HDAC3 | rs72792345 | 0.2885211 | 0.851857328 | 0.6926409 | 1.02 (0.99 - 1.05) | |  |  |
| cg25940447 | GNPDA1 | rs164080 | 0.3447095 | 0.870160803 |  | 1.03 (0.97 - 1.08) | |  |  |
| cg06866033 | GNPDA1 | rs9324861 | 0.3775314 | 0.880649279 | 0.7602821 | 0.96 (0.89 - 1.05) | |  |  |
| cg05560697 | GNPDA1 | rs57365234 | 0.3797228 | 0.881250655 |  | 1.04 (0.95 - 1.15) | |  |  |
| cg05576845 | PPP2R2B | rs62375682 | 0.3446771 | 0.870160803 | 0.4933577 | 1.03 (0.97 - 1.1) | |  |  |
| cg10926851 | PPP2R2B | rs1835950 | 0.4829856 | 0.909795554 | 0.3113062 | 1.01 (0.99 - 1.02) | |  |  |
| cg19335130 | PPP2R2B | rs80032804 | 0.7447905 | 0.965761902 | 0.1052314 | 0.99 (0.95 - 1.04) | |  |  |
| cg22642777 | PPP2R2B | rs178547 | 0.8617166 | 0.985444341 | 0.06081527 | 0.99 (0.89 - 1.1) | |  |  |
| cg15927927 | PPP2R2B | rs4515335 | 0.5913893 | 0.93585134 | 0.2634321 | 0.98 (0.9 - 1.06) | |  |  |
| cg25021259 | PPP2R2B | rs2963082 | 0.3285602 | 0.864528993 | 0.4859848 | 0.98 (0.93 - 1.02) | |  |  |
| cg13983063 | PPP2R2B | rs223100 | 0.3042761 | 0.857248999 | 0.3612316 | 0.98 (0.94 - 1.02) | |  |  |
| cg02760293 | PPP2R2B | rs2963080 | 0.326703 | 0.864112976 | 0.5214728 | 0.99 (0.96 - 1.01) | |  |  |
| cg27319536 | PPP2R2B | rs10055150 | 0.07814286 | 0.674602752 | 0.1066346 | 1.06 (0.99 - 1.13) | |  |  |
| cg16617774 | PPP2R2B | rs987650 | 0.5609349 | 0.930060535 | 0.3663444 | 0.97 (0.86 - 1.08) | |  |  |
| cg21580376 | ADRB2 | rs1042717 | 0.4171365 | 0.892302816 | 0.7231413 | 1.02 (0.97 - 1.07) | |  |  |
| cg21895377 | ADRB2 | rs10070291 | 0.136228 | 0.738616218 | 0.9603193 | 0.93 (0.84 - 1.02) | |  |  |
| cg19910679 | PPARGC1B | rs30887 | 0.907527 | 0.99095286 | 0.7256202 | 1 (0.93 - 1.06) | |  |  |
| cg12958020 | PDGFRB | rs11167495 | 0.5591155 | 0.929599097 | 0.5880903 | 0.98 (0.93 - 1.04) | |  |  |
| cg01816748 | PDGFRB | rs11748255 | 0.8883519 | 0.988146782 | 0.597395 | 0.99 (0.92 - 1.07) | |  |  |
| cg15924831 | PDGFRB | rs3776081 | 0.9633936 | 0.996245208 | 0.8340844 | 1 (0.9 - 1.12) |  |  |  |
| cg11042320 | PDGFRB | rs56757464 | 0.4829774 | 0.909795554 | 0.6803553 | 1.02 (0.97 - 1.07) | |  |  |
| cg16429070 | PDGFRB | rs3828610 | 0.9055834 | 0.990828994 | 0.8425574 | 1 (0.95 - 1.04) | |  |  |
| cg25110734 | PDGFRB | rs3776075 | 0.8772385 | 0.986942168 | 0.728464 | 1 (0.96 - 1.05) | |  |  |
| cg12727795 | PDGFRB | rs3828610 | 0.9056017 | 0.990828994 | 0.6338202 | 0.99 (0.88 - 1.12) | |  |  |
| cg16017303 | PDGFRB | rs61124272 | 0.6777551 | 0.953302966 | 0.7619416 | 1.02 (0.93 - 1.12) | |  |  |
| cg17861277 | GPX3 | rs10434722 | 0.2686599 | 0.842789584 | 0.1368554 | 1.07 (0.95 - 1.2) | |  |  |
| cg21504918 | GPX3 | rs870407 | 0.1064316 | 0.709533887 | 0.7394039 | 0.91 (0.81 - 1.02) | |  |  |
| cg10802379 | GPX3 | rs870407 | 0.1015275 | 0.706425337 | 0.5912328 | 0.93 (0.85 - 1.01) | |  |  |
| cg26891370 | GPX3 | rs870407 | 0.1002492 | 0.705303024 | 0.8635683 | 1.06 (0.99 - 1.14) | |  |  |
| cg06754923 | MED7 | rs2434974 | 0.7662928 | 0.967447019 | 0.6960314 | 1.02 (0.91 - 1.14) | |  |  |
| cg18816534 | EBF1 | rs17717039 | 0.2152024 | 0.811361421 | 0.9863508 | 1.1 (0.94 - 1.29) | |  |  |
| cg23210478 | EBF1 | rs72813916 | 0.05132536 | 0.62830284 | 0.5124216 | 1.05 (1 - 1.09) | |  |  |
| cg13383639 | EBF1 | rs17717039 | 0.2069372 | 0.803527536 | 0.7242149 | 1.04 (0.98 - 1.12) | |  |  |
| cg26117521 | EBF1 | rs7734385 | 0.1042782 | 0.707175673 | 0.4934896 | 0.94 (0.88 - 1.01) | |  |  |
| cg00210856 | EBF1 | rs11743393 | 0.5292019 | 0.921652415 | 0.6074043 | 1.03 (0.95 - 1.11) | |  |  |
| cg01551441 | EBF1 | rs7736443 | 0.6457883 | 0.94603711 | 0.1831368 | 0.99 (0.95 - 1.03) | |  |  |
| cg01192077 | EBF1 | rs17717039 | 0.2070197 | 0.803681093 | 0.9264635 | 1.04 (0.98 - 1.12) | |  |  |
| cg18341960 | FABP6 | rs9791163 | 0.1403471 | 0.743779452 | 0.3368813 | 0.95 (0.88 - 1.02) | |  |  |
| cg00259472 | FABP6 | rs4921118 | 0.7891027 | 0.972251328 | 0.6835496 | 1.01 (0.93 - 1.1) | |  |  |
| cg19889795 | FABP6 | rs6891770 | 0.2851224 | 0.85112628 | 0.663627 | 0.97 (0.91 - 1.03) | |  |  |
| cg10431265 | FABP6 | rs11959920 | 0.7995142 | 0.974366314 | 0.9284772 | 0.99 (0.88 - 1.11) | |  |  |
| cg16546054 | FABP6 | rs6898052 | 0.6591224 | 0.948466104 | 0.982048 | 0.97 (0.86 - 1.1) | |  |  |
| cg15140323 | FABP6 | rs6556480 | 0.3546949 | 0.872952434 | 0.8954488 | 0.95 (0.86 - 1.05) | |  |  |
| cg27374026 | FABP6 | rs79024790 | 0.3242336 | 0.862797422 | 0.5043918 | 0.93 (0.81 - 1.07) | |  |  |
| cg22861316 | FABP6 | rs6861931 | 0.6753416 | 0.952589671 | 0.9278184 | 0.97 (0.85 - 1.11) | |  |  |
| cg23994191 | HK3 | rs539822 | 0.7229797 | 0.961554924 | 0.1121752 | 0.99 (0.94 - 1.05) | |  |  |
| cg06485139 | HK3 | rs58956809 | 0.7054673 | 0.959032107 | 0.17351 | 0.98 (0.88 - 1.09) | |  |  |
| cg06783121 | HK3 | rs58956809 | 0.7051916 | 0.958924454 | 0.1251959 | 0.99 (0.92 - 1.06) | |  |  |
| cg19960778 | HK3 | rs58956809 | 0.7054781 | 0.959032107 | 0.1911556 | 0.98 (0.88 - 1.09) | |  |  |
| cg15914500 | HK3 | rs73337977 | 0.4099913 | 0.890142955 | 0.9900634 | 1.03 (0.96 - 1.12) | |  |  |
| cg17809377 | HK3 | rs353464 | 0.5641627 | 0.93021518 | 0.06312514 | 0.98 (0.93 - 1.04) | |  |  |
| cg23912072 | HK3 | rs9313744 | 0.3418136 | 0.869209435 | 0.4968177 | 0.96 (0.89 - 1.04) | |  |  |
| cg19791262 | HK3 | rs6878050 | 0.1988195 | 0.797806124 | 0.06136219 | 0.93 (0.83 - 1.04) | |  |  |
| cg26115276 | RUFY1 | rs4701140 | 0.9436323 | 0.995184323 | 0.4327825 | 1 (0.93 - 1.08) | |  |  |
| cg10693251 | RUFY1 | rs6899218 | 0.633151 | 0.944551386 | 0.2495289 | 0.98 (0.92 - 1.05) | |  |  |
| cg16644338 | RUFY1 | rs4701140 | 0.9436327 | 0.995184323 | 0.3989424 | 1 (0.92 - 1.08) | |  |  |
| cg11939631 | RUFY1 | rs4701140 | 0.9436318 | 0.995184323 | 0.4493069 | 1 (0.93 - 1.08) | |  |  |
| cg24649697 | RUFY1 | rs10078796 | 0.2061968 | 0.803286543 | 0.2840595 | 0.92 (0.81 - 1.05) | |  |  |
| cg17614703 | LTC4S | rs6895902 | 0.7035979 | 0.958680302 | 0.4678099 | 0.99 (0.94 - 1.04) | |  |  |
| cg19810457 | MAPK9 | rs6887544 | 0.4663809 | 0.906031661 | 0.3792113 | 1.04 (0.94 - 1.16) | |  |  |
| cg01192746 | MAPK9 | rs35703820 | 0.7537968 | 0.966830973 | 0.9872126 | 1.01 (0.96 - 1.06) | |  |  |
| cg00262681 | MAPK9 | rs7702282 | 0.6510233 | 0.946722187 | 0.7960626 | 0.99 (0.97 - 1.02) | |  |  |
| cg06570125 | MAPK9 | rs3805705 | 0.1723265 | 0.773815229 | 0.1168671 | 0.96 (0.92 - 1.02) | |  |  |
| cg26918954 | MAPK9 | rs888926 | 0.4090374 | 0.889888247 | 0.1390394 | 1.03 (0.95 - 1.12) | |  |  |
| cg14794799 | MAPK9 | rs55901738 | 0.5376238 | 0.922827354 | 0.3546461 | 0.98 (0.93 - 1.04) | |  |  |
| cg23221052 | MAPK9 | rs55901738 | 0.5370988 | 0.922827354 | 0.5510678 | 1.01 (0.99 - 1.03) | |  |  |
| cg13944838 | MAPK9 | rs55901738 | 0.5370957 | 0.922827354 | 0.3789193 | 1.01 (0.99 - 1.03) | |  |  |
| cg23248424 | MAPK9 | rs55901738 | 0.5370908 | 0.922827354 | 0.5428622 | 1.01 (0.99 - 1.02) | |  |  |
| cg02891314 | MAPK9 | rs55901738 | 0.5370893 | 0.922827354 | 0.5394676 | 1.01 (0.99 - 1.02) | |  |  |
| cg17202909 | MAPK9 | rs73811354 | 0.6534445 | 0.947427435 | 0.3963176 | 1.02 (0.93 - 1.13) | |  |  |
| cg11891860 | GFPT2 | rs7730414 | 0.2898706 | 0.85262844 | 0.8271144 | 1.06 (0.95 - 1.19) | |  |  |
| cg08389686 | GFPT2 | rs2303011 | 0.079358 | 0.67606367 | 0.05670345 | 0.96 (0.92 - 1) | |  |  |
| cg16021953 | GFPT2 | rs6601110 | 0.3168596 | 0.861180527 | 0.7324729 | 1.06 (0.95 - 1.18) | |  |  |
| cg12800566 | GFPT2 | rs4700735 | 0.2410185 | 0.827531654 | 0.6539288 | 1.03 (0.98 - 1.07) | |  |  |
| cg10220068 | GFPT2 | rs4432844 | 0.2303052 | 0.820799676 | 0.5270505 | 0.97 (0.93 - 1.02) | |  |  |
| cg09068286 | GFPT2 | rs77831883 | 0.3841045 | 0.882688405 | 0.1931287 | 1.08 (0.91 - 1.27) | |  |  |
| cg23933731 | GFPT2 | rs77831883 | 0.381534 | 0.881767111 | 0.135655 | 0.97 (0.91 - 1.04) | |  |  |
| cg05904716 | GFPT2 | rs10043913 | 0.79432 | 0.973165555 | 0.6412051 | 0.99 (0.9 - 1.08) | |  |  |
| cg26523565 | GFPT2 | rs77831883 | 0.3841081 | 0.882688405 | 0.1564949 | 1.08 (0.91 - 1.27) | |  |  |
| cg07535366 | GFPT2 | rs1001262 | 0.8855026 | 0.987501595 | 0.5624531 | 0.99 (0.88 - 1.11) | |  |  |
| cg04553364 | GFPT2 | rs7380882 | 0.8615141 | 0.985444341 | 0.2526589 | 0.99 (0.91 - 1.08) | |  |  |
| cg14314729 | GFPT2 | rs10055671 | 0.9271252 | 0.993111852 | 0.1702012 | 1 (0.94 - 1.07) | |  |  |
| cg18132076 | GMDS | rs2449971 | 0.3111907 | 0.85912998 | 0.9291136 | 1.02 (0.98 - 1.07) | |  |  |
| cg25049733 | GMDS | rs2449971 | 0.3125745 | 0.85912998 | 0.7994721 | 1.04 (0.97 - 1.11) | |  |  |
| cg23229309 | GMDS | rs234937 | 0.2960877 | 0.855640007 | 0.1869004 | 1.04 (0.96 - 1.13) | |  |  |
| cg12303981 | GMDS | rs9378688 | 0.4213842 | 0.893595795 | 0.03564761 | 0.99 (0.98 - 1.01) | |  |  |
| cg08308214 | ECI2 | rs644150 | 0.901147 | 0.990758602 | 0.9474818 | 0.99 (0.91 - 1.08) | |  |  |
| cg04369491 | MBOAT1 | rs843321 | 0.7936498 | 0.973052581 | 0.06252737 | 0.99 (0.93 - 1.05) | |  |  |
| cg03967327 | ALDH5A1 | rs4712825 | 0.3317078 | 0.865816922 | 0.3129248 | 0.96 (0.88 - 1.04) | |  |  |
| cg18395531 | ALDH5A1 | rs140075859 | 0.2570208 | 0.836025986 | 0.3871116 | 1.02 (0.98 - 1.07) | |  |  |
| cg25375764 | ALDH5A1 | rs4646828 | 0.4019615 | 0.887542832 | 0.4525555 | 0.96 (0.86 - 1.06) | |  |  |
| cg13327078 | ALDH5A1 | rs2817213 | 0.3825319 | 0.88224618 | 0.9265447 | 0.98 (0.93 - 1.03) | |  |  |
| cg00346970 | ALDH5A1 | rs2817219 | 0.659055 | 0.948466104 | 0.8786619 | 0.98 (0.89 - 1.08) | |  |  |
| cg07790947 | GPX6 | rs34302671 | 0.2785544 | 0.847950036 | 0.3577344 | 1.06 (0.95 - 1.18) | |  |  |
| cg10877524 | GPX6 | rs2227228 | 0.3310927 | 0.865593122 | 0.4417674 | 1.05 (0.95 - 1.17) | |  |  |
| cg18564587 | GPX6 | rs4713166 | 0.7832894 | 0.971520782 | 0.6540071 | 0.98 (0.87 - 1.11) | |  |  |
| cg12093043 | GPX6 | rs2531820 | 0.3681556 | 0.878003524 | 0.3056631 | 1.05 (0.94 - 1.17) | |  |  |
| cg05555633 | GPX6 | rs116523144 | 0.4195032 | 0.892791585 | 0.667045 | 0.99 (0.96 - 1.02) | |  |  |
| cg05921260 | GPX6 | rs9379946 | 0.9075946 | 0.99095286 | 0.4910477 | 1 (0.95 - 1.06) | |  |  |
| cg18208998 | GPX5 | rs2531801 | 0.2057207 | 0.802570683 | 0.4397907 | 0.94 (0.86 - 1.03) | |  |  |
| cg07734514 | GPX5 | rs141380637 | 0.09228234 | 0.698451712 | 0.04771643 | 1.08 (0.99 - 1.18) | |  |  |
| cg02803996 | GPX5 | rs2531818 | 0.4918536 | 0.913252814 | 0.9401249 | 1.03 (0.95 - 1.11) | |  |  |
| cg18361418 | GPX5 | rs2531818 | 0.4929953 | 0.913366516 | 0.8895548 | 1.04 (0.94 - 1.15) | |  |  |
| cg23936402 | GPX5 | rs72844223 | 0.810902 | 0.976033217 | 0.120603 | 1.01 (0.93 - 1.1) | |  |  |
| cg27531490 | TNF | rs1800630 | 0.07484367 | 0.670505988 | 0.01228473 | 1.04 (1 - 1.08) | |  |  |
| cg12681001 | TNF | rs139179724 | 0.9862354 | 0.997947936 | 0.9526835 | 1 (0.69 - 1.47) | |  |  |
| cg21222743 | TNF | rs139179724 | 0.9862353 | 0.997947936 | 0.9936984 | 1 (0.7 - 1.43) |  |  |  |
| cg26729380 | TNF | rs1799724 | 0.9914519 | 0.998453197 | 0.2808376 | 1 (0.93 - 1.07) | |  |  |
| cg10650821 | TNF | rs1799724 | 0.9914519 | 0.998453197 | 0.2124496 | 1 (0.88 - 1.13) | |  |  |
| cg18643176 | CSNK2B | rs28381344 | 0.5060787 | 0.916820831 | 0.6906613 | 1.03 (0.95 - 1.12) | |  |  |
| cg19036153 | NEU1 | rs41267082 | 0.6558532 | 0.947912346 | 0.6661337 | 1.02 (0.93 - 1.12) | |  |  |
| cg25600103 | SLC44A4 | rs3130482 | 0.06857495 | 0.66024538 | 0.1100432 | 0.9 (0.81 - 1.01) | |  |  |
| cg02252769 | SLC44A4 | rs577272 | 0.08372319 | 0.685321483 | 0.2710128 | 1.11 (0.99 - 1.24) | |  |  |
| cg20370184 | SLC44A4 | rs2242664 | 0.06826968 | 0.659696232 | 0.03462985 | 0.99 (0.97 - 1) | |  |  |
| cg09130091 | SLC44A4 | rs644774 | 0.07401323 | 0.669415137 | 0.1007898 | 1.06 (0.99 - 1.13) | |  |  |
| cg13975172 | SLC44A4 | rs494620 | 0.06276891 | 0.648768221 | 0.4030327 | 1.03 (1 - 1.07) | |  |  |
| cg02721751 | SLC44A4 | rs494620 | 0.06285508 | 0.648768221 | 0.3224889 | 1.03 (1 - 1.07) | |  |  |
| cg27587935 | SLC44A4 | rs504653 | 0.1545845 | 0.757822581 | 0.2085169 | 0.92 (0.82 - 1.03) | |  |  |
| cg25013052 | SLC44A4 | rs494620 | 0.07353884 | 0.668734227 | 0.5023409 | 1.11 (0.99 - 1.24) | |  |  |
| cg20544437 | SLC44A4 | rs577272 | 0.07369732 | 0.668870397 | 0.205438 | 0.95 (0.91 - 1) | |  |  |
| cg11726150 | SLC44A4 | rs386480 | 0.8665383 | 0.985888378 | 0.100143 | 1.01 (0.9 - 1.13) | |  |  |
| cg09298971 | SLC44A4 | rs9267659 | 0.1020174 | 0.706425337 | 0.07314909 | 1.04 (0.99 - 1.08) | |  |  |
| cg27003765 | SLC44A4 | rs589428 | 0.9457095 | 0.99552419 | 0.01340615 | 1 (0.96 - 1.03) | |  |  |
| cg07357081 | SLC44A4 | rs115526171 | 0.2334187 | 0.822444625 | 0.03493739 | 1.02 (0.99 - 1.05) | |  |  |
| cg23431175 | SLC44A4 | rs589428 | 0.9457095 | 0.99552419 | 0.01041451 | 1 (0.97 - 1.03) | |  |  |
| cg21236501 | SLC44A4 | rs114470326 | 0.8002872 | 0.974443827 | 0.003691116 | 1 (0.98 - 1.02) | |  |  |
| cg24529722 | SLC44A4 | rs589428 | 0.9457097 | 0.99552419 | 0.01375806 | 1 (0.95 - 1.04) | |  |  |
| cg04567302 | SLC44A4 | rs589428 | 0.9457095 | 0.99552419 | 0.01080583 | 1 (0.97 - 1.03) | |  |  |
| cg03045620 | SLC44A4 | rs589428 | 0.9457095 | 0.99552419 | 0.01098122 | 1 (0.97 - 1.03) | |  |  |
| cg07363637 | SLC44A4 | rs589428 | 0.9457094 | 0.99552419 | 0.005781072 | 1 (0.97 - 1.03) | |  |  |
| cg24707219 | SLC44A4 | rs589428 | 0.9457094 | 0.99552419 | 0.01033443 | 1 (0.97 - 1.03) | |  |  |
| cg16553272 | SLC44A4 | rs589428 | 0.9457093 | 0.99552419 | 0.005229518 | 1 (0.98 - 1.02) | |  |  |
| cg19154116 | CYP21A2 | rs389512 | 0.7218824 | 0.961495026 | 0.6846086 | 0.98 (0.87 - 1.1) | |  |  |
| cg27449793 | CYP21A2 | rs9271545 | 0.1736176 | 0.774881116 | 0.2771334 | 1.05 (0.98 - 1.14) | |  |  |
| cg18790646 | CYP21A2 | rs114969413 | 0.3918618 | 0.886195129 | 0.3642077 | 1.04 (0.95 - 1.15) | |  |  |
| cg14026451 | CYP21A2 | rs9461728 | 0.8754651 | 0.986942168 | 0.9676488 | 1.03 (0.73 - 1.45) | |  |  |
| cg12274082 | CYP21A2 | rs143766319 | 0.8811268 | 0.987105959 | 0.9692912 | 1.02 (0.77 - 1.37) | |  |  |
| cg20328456 | PPT2 | rs1043618 | 0.5079256 | 0.91691468 | 0.03008305 | 1.04 (0.93 - 1.15) | |  |  |
| cg17329164 | PPT2 | rs41268896 | 0.06590405 | 0.656039124 | 0.173341 | 1.09 (0.99 - 1.2) | |  |  |
| cg18049167 | PPT2 | rs41268896 | 0.06334881 | 0.64975418 | 0.1758949 | 1.08 (1 - 1.16) | |  |  |
| cg17229678 | PPT2 | rs41268896 | 0.05940677 | 0.642648259 | 0.4481623 | 1.05 (1 - 1.11) | |  |  |
| cg27134827 | PPT2 | rs41268896 | 0.05972034 | 0.643264779 | 0.4015437 | 1.05 (1 - 1.11) | |  |  |
| cg21241317 | PPT2 | rs3130285 | 0.3018534 | 0.857248999 | 0.01236367 | 1.04 (0.96 - 1.12) | |  |  |
| cg04877280 | PPT2 | rs3096695 | 0.2874097 | 0.851751843 | 0.2485641 | 1.05 (0.96 - 1.16) | |  |  |
| cg06832687 | PPT2 | rs3096695 | 0.2849381 | 0.85112628 | 0.9221692 | 1.03 (0.97 - 1.1) | |  |  |
| cg27070869 | PPT2 | rs3134954 | 0.2637786 | 0.839954239 | 0.2258967 | 1.07 (0.95 - 1.2) | |  |  |
| cg03995156 | PPT2 | rs3134954 | 0.2587904 | 0.836530464 | 0.6016541 | 1.04 (0.97 - 1.1) | |  |  |
| cg00086577 | PPT2 | rs3134954 | 0.2577816 | 0.836348785 | 0.6321096 | 1.03 (0.98 - 1.08) | |  |  |
| cg04856022 | PPT2 | rs3134954 | 0.2579959 | 0.836372321 | 0.2625381 | 1.03 (0.98 - 1.08) | |  |  |
| cg04536704 | PPT2 | rs3134954 | 0.2584716 | 0.836471869 | 0.5237775 | 1.03 (0.98 - 1.1) | |  |  |
| cg24509300 | PPT2 | rs3134954 | 0.2587958 | 0.836530464 | 0.776617 | 1.04 (0.97 - 1.1) | |  |  |
| cg06902929 | PPT2 | rs138950925 | 0.9012736 | 0.990758602 | 0.2610398 | 0.98 (0.68 - 1.41) | |  |  |
| cg00689685 | AGPAT1 | rs41268896 | 0.05691574 | 0.639416935 | 0.3698749 | 0.98 (0.95 - 1) | |  |  |
| cg19236328 | AGPAT1 | rs9469084 | 0.9210344 | 0.99277463 | 0.8410501 | 1 (0.98 - 1.03) | |  |  |
| cg13784283 | RXRB | rs11969547 | 0.3477898 | 0.871431694 | 0.8825621 | 0.97 (0.9 - 1.04) | |  |  |
| cg09483904 | HSD17B8 | rs16869652 | 0.8835789 | 0.987421495 | 0.5582294 | 1.01 (0.9 - 1.13) | |  |  |
| cg09100940 | HSD17B8 | rs2229785 | 0.04136475 | 0.599672379 | 0.04408879 | 0.95 (0.91 - 1) | |  |  |
| cg21555177 | HSD17B8 | rs139326709 | 0.439427 | 0.899263816 | 0.9711305 | 1.04 (0.94 - 1.14) | |  |  |
| cg00225157 | HSD17B8 | rs110662 | 0.04113801 | 0.598965553 | 0.03230091 | 0.93 (0.87 - 1) | |  |  |
| cg01502872 | HSD17B8 | rs114171462 | 0.8887648 | 0.988312289 | 0.4019377 | 1.01 (0.92 - 1.1) | |  |  |
| cg02802514 | HSD17B8 | rs149808880 | 0.4086727 | 0.889808154 | 0.9684677 | 1.02 (0.97 - 1.07) | |  |  |
| cg14644387 | HSD17B8 | rs139326709 | 0.4373508 | 0.898377301 | 0.5688104 | 1.01 (0.99 - 1.03) | |  |  |
| cg02647520 | HSD17B8 | rs139326709 | 0.4391012 | 0.899156641 | 0.8406272 | 1.04 (0.95 - 1.13) | |  |  |
| cg00155619 | HSD17B8 | rs150011156 | 0.445818 | 0.90087073 | 0.9518229 | 1.05 (0.93 - 1.18) | |  |  |
| cg12699756 | HSD17B8 | rs2076310 | 0.7387817 | 0.964496589 | 0.05107639 | 0.99 (0.91 - 1.07) | |  |  |
| cg00640376 | HSD17B8 | rs2076310 | 0.7386572 | 0.964496589 | 0.03969886 | 0.99 (0.94 - 1.05) | |  |  |
| cg13775306 | ITPR3 | rs11757612 | 0.5977754 | 0.93696072 | 0.2590696 | 1.02 (0.96 - 1.08) | |  |  |
| cg08355863 | ITPR3 | rs71565398 | 0.06672057 | 0.656949719 | 0.3893655 | 1.04 (1 - 1.08) | |  |  |
| cg02066343 | ITPR3 | rs7769019 | 0.6783851 | 0.953518478 | 0.4836662 | 1.03 (0.9 - 1.18) | |  |  |
| cg01035815 | ITPR3 | rs11754153 | 0.421065 | 0.893595795 | 0.9914648 | 1.02 (0.97 - 1.07) | |  |  |
| cg17865955 | ITPR3 | rs4713650 | 0.5761464 | 0.932603663 | 0.1439106 | 1.01 (0.98 - 1.04) | |  |  |
| cg01866630 | ITPR3 | rs422652 | 0.1087309 | 0.711986026 | 0.1108409 | 0.91 (0.82 - 1.02) | |  |  |
| cg06954761 | ITPR3 | rs9469532 | 0.07033307 | 0.664146758 | 0.01498806 | 1.08 (0.99 - 1.18) | |  |  |
| cg11539664 | ITPR3 | rs41266729 | 0.5731953 | 0.931942438 | 0.7299974 | 0.93 (0.74 - 1.18) | |  |  |
| cg07713849 | ITPR3 | rs114394181 | 0.399184 | 0.887037757 | 0.7667144 | 1.04 (0.96 - 1.12) | |  |  |
| cg21748751 | PPARD | rs6939017 | 0.8303416 | 0.979659205 | 0.8695932 | 0.99 (0.89 - 1.1) | |  |  |
| cg18204017 | PPARD | rs6937088 | 0.6493551 | 0.946505271 | 0.8365608 | 0.97 (0.85 - 1.11) | |  |  |
| cg26824091 | GLO1 | rs146765847 | 0.8046236 | 0.974973312 | 0.07353596 | 0.99 (0.92 - 1.06) | |  |  |
| cg15021914 | NFYA | rs7775972 | 0.6653886 | 0.950486292 | 0.4133481 | 1.01 (0.97 - 1.05) | |  |  |
| cg01595397 | MED20 | rs7739064 | 0.5822823 | 0.93415941 | 0.7311236 | 0.98 (0.91 - 1.06) | |  |  |
| cg17945153 | CCND3 | rs4607417 | 0.3091729 | 0.858221866 | 0.07127332 | 1.05 (0.96 - 1.15) | |  |  |
| cg12151296 | CCND3 | rs6917299 | 0.0616677 | 0.646279777 | 0.7701061 | 0.9 (0.81 - 1) |  |  |  |
| cg26491833 | CCND3 | rs7453606 | 0.8749802 | 0.986942168 | 0.05500356 | 1 (0.95 - 1.06) | |  |  |
| cg11171825 | PEX6 | rs11752813 | 0.361532 | 0.875690193 | 0.6344626 | 1.04 (0.95 - 1.15) | |  |  |
| cg19747945 | PEX6 | rs9471985 | 0.4003516 | 0.887037757 | 0.3223252 | 0.98 (0.94 - 1.02) | |  |  |
| cg01125463 | PEX6 | rs9462856 | 0.4021232 | 0.887644674 | 0.4323931 | 0.97 (0.92 - 1.03) | |  |  |
| cg26304593 | PEX6 | rs28868299 | 0.3788124 | 0.880717157 | 0.3985094 | 0.98 (0.94 - 1.02) | |  |  |
| cg02359409 | PEX6 | rs4714638 | 0.335299 | 0.866861176 | 0.6148293 | 1.03 (0.97 - 1.09) | |  |  |
| cg18889437 | PEX6 | rs9471987 | 0.3891069 | 0.885406774 | 0.5367369 | 1.02 (0.98 - 1.06) | |  |  |
| cg11913951 | NFKBIE | rs730775 | 0.8566217 | 0.985006713 | 0.8353943 | 0.99 (0.91 - 1.08) | |  |  |
| cg00668559 | NFKBIE | rs730775 | 0.8565897 | 0.985006713 | 0.9209089 | 1 (0.97 - 1.02) | |  |  |
| cg06560379 | NFKBIE | rs730775 | 0.8566257 | 0.985006713 | 0.7489503 | 0.99 (0.91 - 1.08) | |  |  |
| cg03822267 | NFKBIE | rs730775 | 0.8566611 | 0.985006713 | 0.5709097 | 0.99 (0.87 - 1.12) | |  |  |
| cg15787744 | NFKBIE | rs730775 | 0.8565944 | 0.985006713 | 0.8916245 | 1 (0.96 - 1.04) | |  |  |
| cg08855022 | NFKBIE | rs79082484 | 0.2549896 | 0.835062067 | 0.9939148 | 0.95 (0.87 - 1.04) | |  |  |
| cg13163765 | CYP39A1 | rs72863286 | 0.06327181 | 0.649479168 | 0.8138851 | 1.04 (1 - 1.07) | |  |  |
| cg04043742 | PLA2G7 | rs9369632 | 0.3951824 | 0.886752553 | 0.2413024 | 1.05 (0.93 - 1.19) | |  |  |
| cg19702271 | PLA2G7 | rs6923031 | 0.5842694 | 0.934846718 | 0.6762334 | 1.03 (0.92 - 1.15) | |  |  |
| cg16536824 | PLA2G7 | rs6923031 | 0.5834178 | 0.934749783 | 0.4726077 | 1.02 (0.95 - 1.1) | |  |  |
| cg16043523 | TNFRSF21 | rs2207225 | 0.6752582 | 0.952559899 | 0.9689886 | 1.01 (0.98 - 1.03) | |  |  |
| cg18657788 | TNFRSF21 | rs4507589 | 0.470578 | 0.907174689 | 0.9771102 | 0.96 (0.85 - 1.08) | |  |  |
| cg22464186 | TNFRSF21 | rs6458555 | 0.324193 | 0.862797422 | 0.371573 | 0.97 (0.9 - 1.04) | |  |  |
| cg18681426 | ELOVL5 | rs2294856 | 0.1988784 | 0.797806124 | 0.5632216 | 1.05 (0.98 - 1.12) | |  |  |
| cg16946445 | ELOVL5 | rs209483 | 0.439419 | 0.899263816 | 0.9158784 | 1.03 (0.95 - 1.12) | |  |  |
| cg04658615 | ELOVL5 | rs209515 | 0.426219 | 0.894517817 | 0.7710354 | 1.02 (0.97 - 1.07) | |  |  |
| cg14342235 | ELOVL5 | rs9395854 | 0.365557 | 0.877410909 | 0.6713307 | 1.05 (0.94 - 1.17) | |  |  |
| cg11748354 | ELOVL5 | rs9474483 | 0.3650111 | 0.877341081 | 0.7144228 | 1.03 (0.96 - 1.11) | |  |  |
| cg00024396 | ELOVL5 | rs2562896 | 0.4792433 | 0.908977855 | 0.7088774 | 0.95 (0.84 - 1.09) | |  |  |
| cg24524396 | ELOVL5 | rs209488 | 0.6387691 | 0.945332811 | 0.7148883 | 1.03 (0.92 - 1.15) | |  |  |
| cg15666066 | ELOVL5 | rs1346602 | 0.2509266 | 0.833179862 | 0.4408016 | 1.01 (0.99 - 1.04) | |  |  |
| cg05382185 | ELOVL5 | rs9474499 | 0.9163748 | 0.992236069 | 0.1208753 | 1 (0.94 - 1.07) | |  |  |
| cg21134859 | ELOVL5 | rs12194380 | 0.1645318 | 0.766828137 | 0.1988616 | 0.98 (0.96 - 1.01) | |  |  |
| cg13973820 | HMGCLL1 | rs4236136 | 0.4232411 | 0.894226293 | 0.4938794 | 1.03 (0.96 - 1.09) | |  |  |
| cg03932978 | HMGCLL1 | rs9370439 | 0.424607 | 0.894382935 | 0.4505823 | 0.97 (0.9 - 1.04) | |  |  |
| cg15259904 | HMGCLL1 | rs62404313 | 0.1368383 | 0.739620093 | 0.2374052 | 1.09 (0.97 - 1.22) | |  |  |
| cg08322034 | ELOVL4 | rs186915 | 0.1743596 | 0.77547751 | 0.3490839 | 1.05 (0.98 - 1.13) | |  |  |
| cg13297865 | ELOVL4 | rs186915 | 0.1784975 | 0.778571341 | 0.4089396 | 1.08 (0.97 - 1.21) | |  |  |
| cg25643118 | ELOVL4 | rs186915 | 0.1740869 | 0.775382429 | 0.2771912 | 1.05 (0.98 - 1.12) | |  |  |
| cg05492839 | ELOVL4 | rs239540 | 0.177905 | 0.778306546 | 0.260971 | 1.04 (0.98 - 1.11) | |  |  |
| cg18417423 | ELOVL4 | rs239540 | 0.1775142 | 0.77770691 | 0.2731538 | 1.04 (0.98 - 1.1) | |  |  |
| cg16370875 | ELOVL4 | rs186915 | 0.1741205 | 0.775382429 | 0.5330107 | 1.05 (0.98 - 1.12) | |  |  |
| cg08933227 | ELOVL4 | rs186915 | 0.1785914 | 0.778707264 | 0.3262988 | 1.08 (0.97 - 1.21) | |  |  |
| cg01038492 | BCKDHB | rs3812151 | 0.7793587 | 0.970123012 | 0.9124366 | 0.99 (0.9 - 1.09) | |  |  |
| cg08355045 | BCKDHB | rs9343965 | 0.8729254 | 0.986724534 | 0.8953099 | 1 (0.98 - 1.03) | |  |  |
| cg16253997 | BCKDHB | rs3805903 | 0.7085922 | 0.959271339 | 0.4799992 | 0.99 (0.95 - 1.03) | |  |  |
| cg09116618 | BCKDHB | rs10943716 | 0.3080461 | 0.858035676 | 0.856901 | 1.03 (0.97 - 1.1) | |  |  |
| cg14152974 | PGM3 | rs4706174 | 0.2362827 | 0.824433804 | 0.5470066 | 1.09 (0.95 - 1.25) | |  |  |
| cg01354879 | ME1 | rs7751382 | 0.7582958 | 0.966870715 | 0.7461245 | 0.99 (0.9 - 1.08) | |  |  |
| cg08257003 | ME1 | rs3812142 | 0.572496 | 0.931770108 | 0.6269169 | 0.99 (0.96 - 1.03) | |  |  |
| cg01121127 | ME1 | rs12211109 | 0.606526 | 0.939276947 | 0.6172433 | 0.99 (0.96 - 1.02) | |  |  |
| cg16701167 | ME1 | rs13201274 | 0.7216982 | 0.961495026 | 0.7143827 | 0.99 (0.94 - 1.05) | |  |  |
| cg08727218 | CGA | rs35025386 | 0.81648 | 0.976769015 | 0.01102796 | 1.01 (0.91 - 1.12) | |  |  |
| cg03321503 | MAP3K7 | rs72917863 | 0.235099 | 0.823450458 | 0.8262834 | 0.98 (0.94 - 1.01) | |  |  |
| cg23697202 | MAP3K7 | rs72917875 | 0.2133166 | 0.810309387 | 0.7741065 | 0.95 (0.88 - 1.03) | |  |  |
| cg17562697 | MAP3K7 | rs72917863 | 0.2344569 | 0.822861761 | 0.7914195 | 1.01 (0.99 - 1.04) | |  |  |
| cg14635586 | MAP3K7 | rs1145812 | 0.07464358 | 0.670505988 | 0.9458693 | 1.1 (0.99 - 1.22) | |  |  |
| cg07599713 | MAP3K7 | rs282071 | 0.6606454 | 0.949196842 | 0.3626537 | 0.98 (0.89 - 1.08) | |  |  |
| cg01960280 | CCNC | rs2209157 | 0.5227098 | 0.919528906 | 0.1751571 | 0.97 (0.87 - 1.08) | |  |  |
| cg08875094 | CCNC | rs2397341 | 0.2961042 | 0.855660101 | 0.4335929 | 0.98 (0.95 - 1.02) | |  |  |
| cg10688500 | CCNC | rs4839749 | 0.2320533 | 0.821602101 | 0.01757688 | 1.05 (0.97 - 1.12) | |  |  |
| cg08797242 | CCNC | rs4839749 | 0.2311301 | 0.821078213 | 0.009385643 | 1.04 (0.97 - 1.11) | |  |  |
| cg15042332 | FABP7 | rs9482271 | 0.4269009 | 0.894789437 | 0.5474526 | 1.05 (0.93 - 1.17) | |  |  |
| cg03952543 | FABP7 | rs10872251 | 0.6266547 | 0.943814053 | 0.2804505 | 1.02 (0.94 - 1.11) | |  |  |
| cg04060561 | ECHDC1 | rs13215850 | 0.42718 | 0.894797636 | 0.626744 | 0.98 (0.95 - 1.02) | |  |  |
| cg04064050 | ECHDC1 | rs7771923 | 0.698186 | 0.957455844 | 0.2731651 | 0.99 (0.94 - 1.04) | |  |  |
| cg05544413 | ECHDC1 | rs9375503 | 0.7042863 | 0.958680302 | 0.2683686 | 0.99 (0.94 - 1.04) | |  |  |
| cg07513276 | ECHDC1 | rs3798857 | 0.7104319 | 0.95939651 | 0.1995119 | 0.99 (0.93 - 1.05) | |  |  |
| cg11201284 | ECHDC1 | rs12663218 | 0.7595483 | 0.966870715 | 0.156346 | 1.01 (0.94 - 1.09) | |  |  |
| cg02103895 | ECHDC1 | rs2281491 | 0.7053604 | 0.958981484 | 0.367773 | 1.01 (0.97 - 1.05) | |  |  |
| cg00332305 | TIAM2 | rs12207246 | 0.1392546 | 0.741982069 | 0.4131899 | 1.01 (1 - 1.03) | |  |  |
| cg05419581 | TIAM2 | rs9384290 | 0.5204439 | 0.918602233 | 0.1399375 | 0.99 (0.96 - 1.02) | |  |  |
| cg24207161 | TIAM2 | rs6907183 | 0.5086489 | 0.91691468 | 0.1248649 | 0.99 (0.96 - 1.02) | |  |  |
| cg03069098 | TIAM2 | rs2151957 | 0.9153063 | 0.992198732 | 0.1519683 | 1.01 (0.9 - 1.13) | |  |  |
| cg19614919 | TIAM2 | rs73795332 | 0.3806651 | 0.881578458 | 0.5823584 | 0.95 (0.84 - 1.07) | |  |  |
| cg09364590 | TIAM2 | rs112175041 | 0.7487372 | 0.96647031 | 0.8567183 | 0.99 (0.95 - 1.04) | |  |  |
| cg23560388 | TIAM2 | rs112574506 | 0.6460017 | 0.94603711 | 0.9904446 | 0.99 (0.97 - 1.02) | |  |  |
| cg08614082 | SYNJ2 | rs114144741 | 0.9519822 | 0.996245208 | 0.895849 | 1 (0.96 - 1.05) | |  |  |
| cg11051752 | SYNJ2 | rs16900503 | 0.877752 | 0.986942168 | 0.8338317 | 1 (0.95 - 1.05) | |  |  |
| cg18419358 | SYNJ2 | rs9458966 | 0.8442297 | 0.982321132 | 0.7481375 | 1.01 (0.95 - 1.06) | |  |  |
| cg18738548 | SYNJ2 | rs75203695 | 0.3636114 | 0.876450646 | 0.9944908 | 0.98 (0.92 - 1.03) | |  |  |
| cg03979258 | SYNJ2 | rs9459057 | 0.3988702 | 0.887037757 | 0.3162114 | 1.04 (0.95 - 1.14) | |  |  |
| cg15824056 | SYNJ2 | rs62423493 | 0.2353836 | 0.823569697 | 0.9391131 | 1.04 (0.97 - 1.12) | |  |  |
| cg15323840 | SYNJ2 | rs12211290 | 0.6735025 | 0.952005105 | 0.4786985 | 0.99 (0.94 - 1.04) | |  |  |
| cg22242614 | SYNJ2 | rs12211290 | 0.6736071 | 0.952052264 | 0.6153741 | 0.99 (0.93 - 1.05) | |  |  |
| cg13735018 | SYNJ2 | rs11759125 | 0.6326882 | 0.944551386 | 0.4519307 | 0.98 (0.92 - 1.05) | |  |  |
| cg10288437 | SYNJ2 | rs11759125 | 0.6327561 | 0.944551386 | 0.5673775 | 0.98 (0.92 - 1.05) | |  |  |
| cg22307058 | SYNJ2 | rs10046389 | 0.9016445 | 0.990758602 | 0.4337268 | 1 (0.93 - 1.06) | |  |  |
| cg10225755 | SYNJ2 | rs9459141 | 0.9071621 | 0.990949631 | 0.4050553 | 1 (0.94 - 1.07) | |  |  |
| cg08731817 | SYNJ2 | rs12213984 | 0.3182084 | 0.861661904 | 0.03403716 | 1.08 (0.93 - 1.27) | |  |  |
| cg12002139 | SYNJ2 | rs2502620 | 0.5769386 | 0.932849858 | 0.1701972 | 1 (0.98 - 1.01) | |  |  |
| cg06633162 | SYNJ2 | rs2502603 | 0.5561468 | 0.928547204 | 0.2578146 | 0.99 (0.95 - 1.03) | |  |  |
| cg09198138 | SYNJ2 | rs2296510 | 0.640784 | 0.94546956 | 0.5112473 | 0.98 (0.89 - 1.07) | |  |  |
| cg04776470 | SYNJ2 | rs2296510 | 0.6402653 | 0.94546956 | 0.2715267 | 0.99 (0.94 - 1.04) | |  |  |
| cg02753444 | SYNJ2 | rs35786264 | 0.4108134 | 0.890240321 | 0.4767379 | 0.99 (0.98 - 1.01) | |  |  |
| cg08132025 | SYNJ2 | rs6455991 | 0.4693675 | 0.907052044 | 0.3826476 | 0.97 (0.91 - 1.04) | |  |  |
| cg04296321 | SYNJ2 | rs6904543 | 0.4631335 | 0.905275149 | 0.4014092 | 0.97 (0.88 - 1.06) | |  |  |
| cg05253151 | SYNJ2 | rs2296506 | 0.4651692 | 0.905564205 | 0.2263134 | 0.96 (0.87 - 1.06) | |  |  |
| cg11723077 | SYNJ2 | rs1744169 | 0.2379313 | 0.825536809 | 0.3809285 | 1.07 (0.96 - 1.2) | |  |  |
| cg17952826 | ACAT2 | rs16890798 | 0.5324894 | 0.922217975 | 0.5583429 | 1.03 (0.95 - 1.12) | |  |  |
| cg15298323 | ACAT2 | rs9355749 | 0.5849891 | 0.934846718 | 0.4641201 | 1.01 (0.98 - 1.04) | |  |  |
| cg06131755 | ACAT2 | rs9355749 | 0.5849858 | 0.934846718 | 0.4608243 | 1.01 (0.98 - 1.04) | |  |  |
| cg25736982 | ACAT2 | rs6925350 | 0.5765776 | 0.932660326 | 0.4635575 | 1.01 (0.98 - 1.04) | |  |  |
| cg05504194 | ACAT2 | rs1128670 | 0.1989873 | 0.797806124 | 0.5948069 | 0.94 (0.86 - 1.03) | |  |  |
| cg11366901 | ACAT2 | rs7738253 | 0.2740957 | 0.845411049 | 0.8912773 | 1.06 (0.96 - 1.17) | |  |  |
| cg23829577 | ACAT2 | rs3818298 | 0.5802846 | 0.933477851 | 0.5321683 | 1.02 (0.96 - 1.07) | |  |  |
| cg14767165 | ACAT2 | rs1475121 | 0.4166854 | 0.892267448 | 0.5470444 | 1.02 (0.98 - 1.06) | |  |  |
| cg10268548 | ACAT2 | rs1475121 | 0.417687 | 0.892393314 | 0.6930941 | 1.03 (0.96 - 1.1) | |  |  |
| cg17028067 | LPA | rs117340856 | 0.7304106 | 0.963059146 | 0.92408 | 1.04 (0.81 - 1.34) | |  |  |
| cg22008851 | LPA | rs1590183 | 0.3777237 | 0.880668102 | 0.3885434 | 1.03 (0.96 - 1.11) | |  |  |
| cg00692088 | AGPAT4 | rs74797747 | 0.7032527 | 0.958647569 | 0.7970216 | 1 (0.97 - 1.02) | |  |  |
| cg26217832 | AGPAT4 | rs733766 | 0.7176583 | 0.96106857 | 0.3108267 | 1.01 (0.94 - 1.1) | |  |  |
| cg01771096 | AGPAT4 | rs12524665 | 0.8132858 | 0.976406452 | 0.4343358 | 1.01 (0.93 - 1.1) | |  |  |
| cg09043403 | AGPAT4 | rs12524665 | 0.8133506 | 0.976406452 | 0.4012551 | 1.02 (0.89 - 1.15) | |  |  |
| cg14170337 | AGPAT4 | rs12524665 | 0.8134028 | 0.976406452 | 0.4323946 | 1.02 (0.87 - 1.19) | |  |  |
| cg15778610 | AGPAT4 | rs34784502 | 0.09344251 | 0.699732429 | 0.09921488 | 0.94 (0.87 - 1.01) | |  |  |
| cg07074571 | AGPAT4 | rs3757038 | 0.0876137 | 0.691793198 | 0.1359455 | 0.96 (0.91 - 1.01) | |  |  |
| cg23244761 | AGPAT4 | rs12198438 | 0.09404848 | 0.700136013 | 0.1236794 | 0.9 (0.8 - 1.02) | |  |  |
| cg26872907 | AGPAT4 | rs12198438 | 0.08928901 | 0.695428296 | 0.1039339 | 0.92 (0.83 - 1.01) | |  |  |
| cg10735454 | AGPAT4 | rs9365284 | 0.52336 | 0.919758703 | 0.5453337 | 1.02 (0.96 - 1.08) | |  |  |
| cg08346632 | AGPAT4 | rs9355895 | 0.5777422 | 0.933207364 | 0.5575947 | 1.02 (0.96 - 1.07) | |  |  |
| cg14101117 | AGPAT4 | rs73023206 | 0.5738961 | 0.932092124 | 0.4962529 | 1.01 (0.97 - 1.06) | |  |  |
| cg26166717 | AGPAT4 | rs6904671 | 0.9872481 | 0.998177465 | 0.9055929 | 1 (0.93 - 1.08) | |  |  |
| cg21980394 | AGPAT4 | rs117387268 | 0.672506 | 0.95182413 | 0.4708526 | 0.93 (0.67 - 1.3) | |  |  |
| cg19737004 | AGPAT4 | rs78667869 | 0.811351 | 0.976033217 | 0.9962843 | 1.01 (0.91 - 1.13) | |  |  |
| cg04462132 | AGPAT4 | rs78667869 | 0.8113154 | 0.976033217 | 0.9885874 | 1.01 (0.96 - 1.06) | |  |  |
| cg08601570 | FAM120B | rs910426 | 0.5190675 | 0.918405527 | 0.3780505 | 0.98 (0.91 - 1.05) | |  |  |
| cg02504993 | FAM120B | rs9459998 | 0.8991588 | 0.990389574 | 0.2664695 | 1 (0.98 - 1.02) | |  |  |
| cg04922606 | FAM120B | rs7740926 | 0.4412019 | 0.8997726 | 0.09830422 | 1.01 (0.98 - 1.04) | |  |  |
| cg20370364 | FAM120B | rs73040868 | 0.08971874 | 0.695428296 | 0.02258162 | 1.11 (0.98 - 1.26) | |  |  |
| cg12946705 | FAM120B | rs4710827 | 0.4837617 | 0.910144138 | 0.05211863 | 0.97 (0.91 - 1.05) | |  |  |
| cg14366007 | FAM120B | rs9460153 | 0.5719173 | 0.931651393 | 0.4975329 | 0.99 (0.97 - 1.02) | |  |  |
| cg01757548 | FAM120B | rs57100857 | 0.1547452 | 0.757822581 | 0.02512559 | 0.96 (0.92 - 1.01) | |  |  |
| cg08386137 | FAM120B | rs73042806 | 0.1456281 | 0.749837636 | 0.04651782 | 0.94 (0.87 - 1.02) | |  |  |
| cg16453901 | FAM120B | rs9366201 | 0.8472396 | 0.983082241 | 0.234045 | 1.01 (0.91 - 1.13) | |  |  |
| cg25718748 | FAM120B | rs6456212 | 0.3539362 | 0.872535566 | 0.1126211 | 1.01 (0.99 - 1.04) | |  |  |
| cg18217622 | FAM120B | rs6456212 | 0.3539462 | 0.872535566 | 0.1131777 | 1.01 (0.99 - 1.04) | |  |  |
| cg07257824 | FAM120B | rs6456211 | 0.4476329 | 0.90142184 | 0.002491464 | 0.99 (0.95 - 1.02) | |  |  |
| cg15984460 | FAM120B | rs12196499 | 0.6506794 | 0.946720059 | 0.2752447 | 1.03 (0.9 - 1.18) | |  |  |
| cg05955352 | FAM120B | rs12524450 | 0.9626198 | 0.996245208 | 0.9834879 | 1 (0.9 - 1.1) |  |  |  |
| cg03835233 | FAM120B | rs909478 | 0.84817 | 0.983151773 | 0.8006321 | 0.99 (0.89 - 1.1) | |  |  |
| cg14775958 | FAM120B | rs62428590 | 0.6842565 | 0.954559788 | 0.8139934 | 0.98 (0.91 - 1.07) | |  |  |
| cg02112183 | FAM120B | rs12524450 | 0.9626193 | 0.996245208 | 0.8690876 | 1 (0.92 - 1.08) | |  |  |
| cg10482051 | FAM120B | rs11759393 | 0.7342066 | 0.963987233 | 0.8230716 | 1.02 (0.9 - 1.16) | |  |  |
| cg19376127 | FAM120B | rs62428586 | 0.8950085 | 0.989738805 | 0.5162376 | 1 (0.96 - 1.04) | |  |  |
| cg26093847 | FAM120B | rs9460172 | 0.8147484 | 0.976406452 | 0.2211473 | 1.01 (0.93 - 1.1) | |  |  |
| cg11825059 | DGKB | rs6957593 | 0.4754136 | 0.908246703 | 0.3099422 | 0.96 (0.85 - 1.08) | |  |  |
| cg05024627 | DGKB | rs40628 | 0.2177328 | 0.813183229 | 0.3074829 | 1.08 (0.95 - 1.23) | |  |  |
| cg19272540 | DGKB | rs7798124 | 0.1338542 | 0.737382226 | 0.3254097 | 0.98 (0.96 - 1.01) | |  |  |
| cg24398793 | AGMO | rs4141308 | 0.6600822 | 0.94877562 | 0.4500219 | 1 (0.98 - 1.01) | |  |  |
| cg18356276 | AHR | rs79071131 | 0.5396336 | 0.923318562 | 0.1894192 | 1.05 (0.89 - 1.24) | |  |  |
| cg10411510 | AHR | rs79071131 | 0.5394349 | 0.923264914 | 0.2478944 | 1.05 (0.9 - 1.23) | |  |  |
| cg13676215 | AHR | rs10247158 | 0.5447197 | 0.925190374 | 0.2931529 | 0.98 (0.9 - 1.06) | |  |  |
| cg25577322 | AHR | rs111720235 | 0.8039723 | 0.974931075 | 0.8889088 | 0.98 (0.86 - 1.12) | |  |  |
| cg09249682 | AHR | rs17347592 | 0.5906694 | 0.93585134 | 0.6634207 | 0.98 (0.92 - 1.05) | |  |  |
| cg25522484 | PRPS1L1 | rs7804628 | 0.964024 | 0.996325338 | 0.2001016 | 1 (0.95 - 1.05) | |  |  |
| cg15698691 | PRPS1L1 | rs117912312 | 0.1881198 | 0.788484807 | 0.4666264 | 0.82 (0.61 - 1.1) | |  |  |
| cg02484210 | NPY | rs16468 | 0.4704489 | 0.907171902 | 0.7926698 | 0.96 (0.85 - 1.08) | |  |  |
| cg21005607 | NPY | rs2722403 | 0.5050154 | 0.916420949 | 0.500346 | 0.98 (0.93 - 1.04) | |  |  |
| cg18023771 | OSBPL3 | rs17292110 | 0.06446966 | 0.653937508 | 0.1407889 | 1.13 (0.99 - 1.28) | |  |  |
| cg04525464 | OSBPL3 | rs35400285 | 0.5903058 | 0.93585134 | 0.1432719 | 1.03 (0.92 - 1.16) | |  |  |
| cg14762436 | OSBPL3 | rs6979475 | 0.2824847 | 0.849749928 | 0.156143 | 1.01 (0.99 - 1.03) | |  |  |
| cg06173395 | OSBPL3 | rs118134355 | 0.1256527 | 0.730411148 | 0.2231375 | 1.06 (0.98 - 1.15) | |  |  |
| cg22796265 | OSBPL3 | rs135 | 0.4583306 | 0.903711216 | 0.1245901 | 1.03 (0.96 - 1.1) | |  |  |
| cg23191354 | OSBPL3 | rs6957546 | 0.01538096 | 0.491538625 | 0.04042241 | 0.93 (0.88 - 0.99) | |  |  |
| cg01591025 | OSBPL3 | rs181 | 0.9357008 | 0.994575934 | 0.08846834 | 1 (0.94 - 1.06) | |  |  |
| cg15977719 | OSBPL3 | rs57509322 | 0.07150165 | 0.666727624 | 0.04315132 | 1.1 (0.99 - 1.22) | |  |  |
| cg26622211 | OSBPL3 | rs57509322 | 0.06261135 | 0.648661906 | 0.009324217 | 1.05 (1 - 1.1) |  |  |  |
| cg02506717 | CREB5 | rs150896293 | 0.6278217 | 0.944139524 | 0.9723547 | 1.03 (0.9 - 1.18) | |  |  |
| cg11316904 | CREB5 | rs7792124 | 0.1303738 | 0.734870744 | 0.1484358 | 1.04 (0.99 - 1.08) | |  |  |
| cg14927519 | CREB5 | rs41273 | 0.8448769 | 0.982518231 | 0.7896737 | 1.01 (0.91 - 1.13) | |  |  |
| cg05929675 | CREB5 | rs79317757 | 0.7639236 | 0.967128265 | 0.8855853 | 0.98 (0.84 - 1.13) | |  |  |
| cg16534307 | CREB5 | rs11971210 | 0.5293323 | 0.921652415 | 0.8740476 | 0.97 (0.87 - 1.07) | |  |  |
| cg03226887 | CREB5 | rs4722807 | 0.8821996 | 0.987243639 | 0.5457653 | 1 (0.98 - 1.03) | |  |  |
| cg20315150 | CREB5 | rs160340 | 0.886469 | 0.987678589 | 0.3048102 | 1 (0.96 - 1.04) | |  |  |
| cg16989544 | CREB5 | rs79198346 | 0.2187784 | 0.814353912 | 0.2737373 | 0.97 (0.93 - 1.02) | |  |  |
| cg11967592 | CREB5 | rs56381057 | 0.8011834 | 0.974623566 | 0.7961996 | 1.01 (0.92 - 1.12) | |  |  |
| cg05277054 | CREB5 | rs34185967 | 0.3131408 | 0.85912998 | 0.5800754 | 1.06 (0.95 - 1.19) | |  |  |
| cg10421188 | CREB5 | rs4722842 | 0.6910094 | 0.956343164 | 0.8532623 | 0.98 (0.88 - 1.09) | |  |  |
| cg21159940 | CREB5 | rs7791555 | 0.1007132 | 0.705656178 | 0.9353093 | 1.08 (0.99 - 1.18) | |  |  |
| cg18087143 | STARD3NL | rs10255648 | 0.2876925 | 0.851771376 | 0.5092969 | 1.02 (0.98 - 1.06) | |  |  |
| cg04779233 | STARD3NL | rs4723735 | 0.7230313 | 0.961554924 | 0.2308846 | 1.01 (0.96 - 1.06) | |  |  |
| cg09244436 | STARD3NL | rs75547569 | 0.05266488 | 0.63134583 | 0.7708035 | 1.1 (1 - 1.2) |  |  |  |
| cg02237368 | PGAM2 | rs13241398 | 0.9098249 | 0.991444157 | 0.06863667 | 1 (0.93 - 1.08) | |  |  |
| cg21448875 | PGAM2 | rs10236917 | 0.3309803 | 0.865538523 | 0.06326546 | 1.03 (0.97 - 1.08) | |  |  |
| cg26057752 | PGAM2 | rs10236917 | 0.330302 | 0.865141489 | 0.06360274 | 1.02 (0.98 - 1.06) | |  |  |
| cg03470754 | PGAM2 | rs10236917 | 0.3298821 | 0.864828142 | 0.06188982 | 1.01 (0.99 - 1.04) | |  |  |
| cg12631925 | PGAM2 | rs2595647 | 0.05313682 | 0.63284762 | 0.07433154 | 1.04 (1 - 1.08) | |  |  |
| cg23616741 | PGAM2 | rs10236917 | 0.3298979 | 0.864828142 | 0.04997425 | 1.01 (0.99 - 1.04) | |  |  |
| cg21088488 | PGAM2 | rs7779139 | 0.2272846 | 0.818951484 | 0.09066531 | 0.97 (0.93 - 1.02) | |  |  |
| cg01953390 | PGAM2 | rs62458734 | 0.9426848 | 0.995053887 | 0.3759662 | 1 (0.92 - 1.09) | |  |  |
| cg09644332 | PGAM2 | rs11773481 | 0.2942684 | 0.854808362 | 0.1150192 | 0.97 (0.91 - 1.03) | |  |  |
| cg04321303 | PGAM2 | rs11768100 | 0.2478925 | 0.831375306 | 0.06410395 | 0.97 (0.92 - 1.02) | |  |  |
| cg03639919 | GCK | rs2908296 | 0.3509617 | 0.872055283 | 0.07144984 | 1.02 (0.98 - 1.07) | |  |  |
| cg16476432 | GCK | rs35832856 | 0.4092963 | 0.890029484 | 0.02452283 | 0.99 (0.98 - 1.01) | |  |  |
| cg04674755 | OGDH | rs740094 | 0.9417246 | 0.994834391 | 0.2222542 | 1 (0.96 - 1.04) | |  |  |
| cg07408740 | OGDH | rs3801399 | 0.4079142 | 0.88970835 | 0.1431101 | 0.96 (0.88 - 1.05) | |  |  |
| cg24859939 | OGDH | rs56000965 | 0.4093984 | 0.890060271 | 0.1192968 | 1.04 (0.95 - 1.15) | |  |  |
| cg00920269 | ADCY1 | rs62457053 | 0.7938651 | 0.973052581 | 0.2297878 | 1.01 (0.91 - 1.13) | |  |  |
| cg11385933 | ADCY1 | rs2331301 | 0.7648504 | 0.967128265 | 0.09902835 | 0.99 (0.95 - 1.04) | |  |  |
| cg07552315 | ADCY1 | rs7805779 | 0.7927394 | 0.972861292 | 0.6144366 | 1.01 (0.96 - 1.05) | |  |  |
| cg00683984 | ADCY1 | rs2877339 | 0.3470213 | 0.871113557 | 0.3679903 | 0.97 (0.9 - 1.04) | |  |  |
| cg24801123 | ADCY1 | rs59498167 | 0.3733748 | 0.879317214 | 0.3744736 | 0.97 (0.9 - 1.04) | |  |  |
| cg08619378 | ADCY1 | rs11770994 | 0.2928096 | 0.85389413 | 0.5571854 | 0.94 (0.85 - 1.05) | |  |  |
| cg25399541 | ADCY1 | rs10951824 | 0.169359 | 0.771080097 | 0.9191283 | 0.98 (0.95 - 1.01) | |  |  |
| cg16960046 | EGFR | rs11238340 | 0.5039495 | 0.916317278 | 0.4046914 | 0.96 (0.86 - 1.08) | |  |  |
| cg13490352 | EGFR | rs3757408 | 0.2680655 | 0.842282521 | 0.4322921 | 0.96 (0.9 - 1.03) | |  |  |
| cg22396409 | EGFR | rs6969537 | 0.6399505 | 0.945404904 | 0.5469621 | 1.02 (0.93 - 1.12) | |  |  |
| cg07311521 | EGFR | rs6957176 | 0.5823622 | 0.934200455 | 0.1494837 | 1.03 (0.93 - 1.14) | |  |  |
| cg23757825 | EGFR | rs58711464 | 0.7708042 | 0.968074815 | 0.808273 | 0.99 (0.91 - 1.07) | |  |  |
| cg22427313 | EGFR | rs142486263 | 0.9740037 | 0.997273118 | 0.9976045 | 1 (0.8 - 1.24) |  |  |  |
| cg14688342 | EGFR | rs7780270 | 0.4474801 | 0.90142184 | 0.9937171 | 0.96 (0.87 - 1.06) | |  |  |
| cg02166842 | EGFR | rs759158 | 0.4476911 | 0.90142184 | 0.5681825 | 1.04 (0.93 - 1.17) | |  |  |
| cg04156940 | EGFR | rs2041647 | 0.5308382 | 0.92182181 | 0.1247004 | 0.97 (0.89 - 1.06) | |  |  |
| cg05530630 | EGFR | rs13222549 | 0.461153 | 0.904731628 | 0.6458544 | 0.97 (0.89 - 1.05) | |  |  |
| cg21808635 | EGFR | rs3752651 | 0.6770348 | 0.953016044 | 0.5709246 | 1.03 (0.91 - 1.17) | |  |  |
| cg05110225 | SUMF2 | rs62457285 | 0.2874156 | 0.851751843 | 0.1566059 | 0.94 (0.83 - 1.05) | |  |  |
| cg14948434 | SUMF2 | rs10274148 | 0.2235479 | 0.816616175 | 0.06632569 | 1.01 (0.99 - 1.03) | |  |  |
| cg12385599 | PSPH | rs1605030 | 0.8826349 | 0.987274802 | 0.6127906 | 0.99 (0.92 - 1.08) | |  |  |
| cg22101463 | PSPH | rs62460088 | 0.8244455 | 0.978518541 | 0.7793589 | 1.01 (0.96 - 1.06) | |  |  |
| cg10895875 | PSPH | rs10232539 | 0.9621624 | 0.996245208 | 0.186698 | 1 (0.9 - 1.11) |  |  |  |
| cg01285926 | PSPH | rs10232539 | 0.9621618 | 0.996245208 | 0.1614719 | 1 (0.93 - 1.07) | |  |  |
| cg10742917 | PSPH | rs816416 | 0.08448376 | 0.686545366 | 0.1256734 | 1.08 (0.99 - 1.19) | |  |  |
| cg09636202 | PSPH | rs816248 | 0.06576501 | 0.65560207 | 0.3198741 | 1.1 (0.99 - 1.21) | |  |  |
| cg16491960 | PSPH | rs7803114 | 0.1192416 | 0.722893773 | 0.03682874 | 0.93 (0.84 - 1.02) | |  |  |
| cg01981733 | PSPH | rs1640561 | 0.151743 | 0.755139164 | 0.06174973 | 0.93 (0.83 - 1.03) | |  |  |
| cg00343986 | GUSB | rs1631091 | 0.1115941 | 0.7137217 | 0.05742197 | 0.97 (0.94 - 1.01) | |  |  |
| cg25588093 | GUSB | rs62467414 | 0.01431217 | 0.484588219 | 0.0366147 | 0.95 (0.92 - 0.99) | |  |  |
| cg15893346 | GUSB | rs431168 | 0.9088581 | 0.991235929 | 0.9939969 | 0.99 (0.88 - 1.13) | |  |  |
| cg25797912 | MDH2 | rs10230301 | 0.7098473 | 0.959271339 | 0.223938 | 0.99 (0.92 - 1.06) | |  |  |
| cg16489192 | MDH2 | rs3973173 | 0.7030404 | 0.95854894 | 0.3931302 | 0.99 (0.97 - 1.02) | |  |  |
| cg26942532 | MDH2 | rs28689051 | 0.5306643 | 0.921796979 | 0.4852277 | 0.99 (0.95 - 1.03) | |  |  |
| cg17412351 | MDH2 | rs62475329 | 0.8155284 | 0.976464895 | 0.757268 | 0.99 (0.9 - 1.08) | |  |  |
| cg06772202 | MDH2 | rs11768535 | 0.6056396 | 0.938761462 | 0.3482117 | 0.98 (0.89 - 1.07) | |  |  |
| cg02900800 | MDH2 | rs6952753 | 0.8976231 | 0.990106178 | 0.8973241 | 0.99 (0.89 - 1.11) | |  |  |
| cg22103003 | MDH2 | rs869804 | 0.7098168 | 0.959271339 | 0.1144068 | 1 (0.97 - 1.02) | |  |  |
| cg04610667 | MDH2 | rs1637028 | 0.07171095 | 0.667162248 | 0.05313649 | 1.06 (0.99 - 1.14) | |  |  |
| cg16182691 | GNAI1 | rs2189341 | 0.8943874 | 0.989670945 | 0.7429219 | 0.99 (0.88 - 1.12) | |  |  |
| cg05806233 | GNAI1 | rs2428469 | 0.529099 | 0.921652415 | 0.2307972 | 1.04 (0.92 - 1.18) | |  |  |
| cg19507068 | GNAI1 | rs2523186 | 0.7233706 | 0.961561374 | 0.6936223 | 1.02 (0.91 - 1.14) | |  |  |
| cg25744767 | GNAI1 | rs2714450 | 0.6048627 | 0.938518822 | 0.7132493 | 0.97 (0.88 - 1.08) | |  |  |
| cg25418001 | GNAI1 | rs10274707 | 0.9368324 | 0.994621074 | 0.166338 | 1 (0.98 - 1.02) | |  |  |
| cg22110839 | CD36 | rs6467113 | 0.3273515 | 0.864356154 | 0.379249 | 1.01 (0.99 - 1.05) | |  |  |
| cg21925465 | CD36 | rs304775 | 0.9366257 | 0.994575934 | 0.3219765 | 1 (0.92 - 1.1) |  |  |  |
| cg12636421 | CD36 | rs1878214 | 0.4175299 | 0.892368574 | 0.7340431 | 0.96 (0.88 - 1.05) | |  |  |
| cg21369886 | CD36 | rs13226433 | 0.9570057 | 0.996245208 | 0.1449826 | 1 (0.97 - 1.03) | |  |  |
| cg00733978 | CD36 | rs74880111 | 0.433745 | 0.897144651 | 0.1089029 | 0.98 (0.92 - 1.04) | |  |  |
| cg07582133 | CROT | rs11976398 | 0.9653789 | 0.996644602 | 0.982923 | 1 (0.91 - 1.11) | |  |  |
| cg17326451 | CROT | rs116875582 | 0.6501942 | 0.946720059 | 0.3053701 | 0.98 (0.89 - 1.07) | |  |  |
| cg02000606 | ABCB4 | rs1202283 | 0.3834146 | 0.882383062 | 0.4218829 | 1.05 (0.94 - 1.16) | |  |  |
| cg23688817 | ABCB4 | rs55976025 | 0.2171419 | 0.812633733 | 0.1335814 | 1.03 (0.98 - 1.09) | |  |  |
| cg04996195 | ABCB4 | rs55976025 | 0.2154015 | 0.811361421 | 0.1401693 | 1.02 (0.99 - 1.05) | |  |  |
| cg25823085 | ABCB4 | rs55976025 | 0.2154659 | 0.811361421 | 0.1780785 | 1.02 (0.99 - 1.06) | |  |  |
| cg22577606 | CYP51A1 | rs10953069 | 0.5348211 | 0.922711105 | 0.1234999 | 0.99 (0.97 - 1.02) | |  |  |
| cg05099121 | CYP51A1 | rs78520556 | 0.9383386 | 0.994664173 | 0.529762 | 1 (0.94 - 1.07) | |  |  |
| cg18422172 | CYP51A1 | rs6465354 | 0.3197868 | 0.862134112 | 0.4804288 | 0.94 (0.84 - 1.06) | |  |  |
| cg01341755 | CYP51A1 | rs10231350 | 0.5657878 | 0.931025687 | 0.8761977 | 0.97 (0.87 - 1.08) | |  |  |
| cg22117172 | CYP51A1 | rs6972027 | 0.5798286 | 0.933477851 | 0.8604542 | 0.99 (0.93 - 1.04) | |  |  |
| cg03714773 | CYP51A1 | rs9691343 | 0.98089 | 0.99749749 | 0.2619122 | 1 (0.94 - 1.07) | |  |  |
| cg01689657 | CYP51A1 | rs6953816 | 0.5805473 | 0.933477851 | 0.88742 | 0.98 (0.93 - 1.04) | |  |  |
| cg05433222 | PON1 | rs2301711 | 0.693558 | 0.956703617 | 0.6854395 | 0.98 (0.88 - 1.09) | |  |  |
| cg07404485 | PON1 | rs705379 | 0.3060904 | 0.857248999 | 0.7988055 | 1.01 (0.99 - 1.04) | |  |  |
| cg05342682 | PON1 | rs705379 | 0.3061128 | 0.857248999 | 0.862471 | 1.01 (0.99 - 1.04) | |  |  |
| cg04155289 | PON1 | rs705379 | 0.3060596 | 0.857248999 | 0.7409028 | 1.01 (0.99 - 1.04) | |  |  |
| cg19678392 | PON1 | rs705379 | 0.3059263 | 0.857248999 | 0.8014235 | 1.01 (0.99 - 1.03) | |  |  |
| cg21856205 | PON1 | rs705379 | 0.3059444 | 0.857248999 | 0.6092903 | 1.01 (0.99 - 1.03) | |  |  |
| cg17330251 | PON1 | rs705379 | 0.3059397 | 0.857248999 | 0.6204428 | 1.01 (0.99 - 1.03) | |  |  |
| cg01874867 | PON1 | rs705379 | 0.3059629 | 0.857248999 | 0.7946056 | 1.01 (0.99 - 1.03) | |  |  |
| cg20119798 | PON1 | rs705379 | 0.3060397 | 0.857248999 | 0.7953101 | 1.01 (0.99 - 1.04) | |  |  |
| cg04871131 | PON1 | rs705379 | 0.3061213 | 0.857248999 | 0.7771578 | 1.01 (0.99 - 1.04) | |  |  |
| cg07809369 | PON1 | rs705379 | 0.3069754 | 0.857721627 | 0.6348058 | 1.03 (0.98 - 1.08) | |  |  |
| cg17020263 | PON1 | rs854572 | 0.3145266 | 0.859942033 | 0.6723676 | 0.93 (0.8 - 1.08) | |  |  |
| cg04685170 | PON1 | rs78416625 | 0.7094501 | 0.959271339 | 0.9956567 | 1.03 (0.88 - 1.2) | |  |  |
| cg15927196 | PON1 | rs78416625 | 0.7095217 | 0.959271339 | 0.9937378 | 1.03 (0.87 - 1.22) | |  |  |
| cg24750391 | PON1 | rs7779960 | 0.1552528 | 0.758247774 | 0.4375111 | 1.06 (0.98 - 1.15) | |  |  |
| cg08461772 | PON1 | rs43037 | 0.1917105 | 0.792387589 | 0.9935804 | 0.94 (0.85 - 1.03) | |  |  |
| cg14284257 | PON2 | rs4729189 | 0.6792422 | 0.953583248 | 0.9269886 | 1.01 (0.97 - 1.05) | |  |  |
| cg04270402 | PON2 | rs43037 | 0.1885921 | 0.788818017 | 0.9733751 | 0.95 (0.88 - 1.03) | |  |  |
| cg15376972 | PON2 | rs43037 | 0.190821 | 0.791661064 | 0.9723234 | 1.06 (0.97 - 1.17) | |  |  |
| cg07715041 | CYP3A5 | rs2687081 | 0.06704473 | 0.657145675 | 0.582699 | 0.93 (0.86 - 1.01) | |  |  |
| cg03953088 | CYP3A4 | rs34967184 | 0.1478082 | 0.751251171 | 0.7163354 | 0.93 (0.85 - 1.03) | |  |  |
| cg00836662 | MOGAT3 | rs6952520 | 0.489013 | 0.912176488 | 0.7175296 | 1.02 (0.96 - 1.09) | |  |  |
| cg10147075 | MOGAT3 | rs34985488 | 0.4701423 | 0.907171902 | 0.6284598 | 1.02 (0.96 - 1.09) | |  |  |
| cg18046464 | MOGAT3 | rs13240839 | 0.4619927 | 0.904743358 | 0.9457719 | 1.02 (0.97 - 1.06) | |  |  |
| cg08451977 | MOGAT3 | rs4729670 | 0.6027743 | 0.937895724 | 0.7983496 | 0.99 (0.96 - 1.02) | |  |  |
| cg17593404 | DLD | rs8440 | 0.3015587 | 0.857248999 | 0.9383176 | 1.03 (0.97 - 1.1) | |  |  |
| cg13031029 | DLD | rs10953554 | 0.2879114 | 0.851771376 | 0.9456231 | 1.01 (0.99 - 1.03) | |  |  |
| cg20897119 | CAV1 | rs2191500 | 0.7256948 | 0.962458902 | 0.997759 | 0.98 (0.86 - 1.11) | |  |  |
| cg04474049 | CAV1 | rs2742125 | 0.5818693 | 0.933977948 | 0.953972 | 0.98 (0.91 - 1.05) | |  |  |
| cg24770985 | CAV1 | rs56014347 | 0.4940411 | 0.913795021 | 0.9988944 | 0.98 (0.92 - 1.04) | |  |  |
| cg05232628 | CAV1 | rs9920 | 0.7180458 | 0.96106857 | 0.9481683 | 0.99 (0.92 - 1.06) | |  |  |
| cg05917273 | CAV1 | rs6961388 | 0.735138 | 0.964097971 | 0.9888226 | 1 (0.98 - 1.02) | |  |  |
| cg15758240 | LEP | rs1349419 | 0.6900604 | 0.956014797 | 0.118627 | 1.01 (0.97 - 1.05) | |  |  |
| cg00840332 | LEP | rs10249476 | 0.7709949 | 0.968153326 | 0.09338482 | 0.98 (0.88 - 1.1) | |  |  |
| cg00666422 | LEP | rs10954173 | 0.718669 | 0.96106857 | 0.242968 | 0.98 (0.88 - 1.09) | |  |  |
| cg11859982 | LEP | rs57060449 | 0.1714598 | 0.77295689 | 0.2967597 | 0.96 (0.9 - 1.02) | |  |  |
| cg08234689 | LEP | rs7811892 | 0.1523046 | 0.755623527 | 0.2385216 | 0.98 (0.96 - 1.01) | |  |  |
| cg21885361 | LEP | rs7811892 | 0.1522877 | 0.755598988 | 0.199454 | 0.98 (0.96 - 1.01) | |  |  |
| cg26209990 | LEP | rs7811892 | 0.1521619 | 0.755375066 | 0.2271583 | 0.98 (0.96 - 1.01) | |  |  |
| cg20245362 | LEP | rs57060449 | 0.1683128 | 0.770425113 | 0.138681 | 0.98 (0.96 - 1.01) | |  |  |
| cg01745789 | LEP | rs10231132 | 0.5450719 | 0.925385059 | 0.328422 | 1.02 (0.97 - 1.07) | |  |  |
| cg20372230 | LEP | rs57060449 | 0.168973 | 0.771017828 | 0.1441812 | 0.98 (0.94 - 1.01) | |  |  |
| cg02962944 | LEP | rs10954177 | 0.5793014 | 0.933477851 | 0.2793819 | 1.01 (0.97 - 1.05) | |  |  |
| cg07428004 | LEP | rs4731437 | 0.3504894 | 0.872055283 | 0.07133055 | 1.02 (0.98 - 1.06) | |  |  |
| cg07617283 | LEP | rs7811892 | 0.1524186 | 0.755675857 | 0.1730413 | 0.98 (0.95 - 1.01) | |  |  |
| cg13454199 | LEP | rs4731435 | 0.1861468 | 0.787136591 | 0.2055801 | 0.95 (0.89 - 1.02) | |  |  |
| cg02952809 | HILPDA | rs6948333 | 0.9254632 | 0.993064899 | 0.657364 | 1 (0.94 - 1.06) | |  |  |
| cg24612707 | HILPDA | rs4731446 | 0.9215251 | 0.992834101 | 0.6400616 | 1 (0.96 - 1.04) | |  |  |
| cg01189915 | HILPDA | rs10245559 | 0.5637309 | 0.930212284 | 0.6583868 | 1.01 (0.97 - 1.05) | |  |  |
| cg07921314 | NRF1 | rs7782520 | 0.8640765 | 0.985647249 | 0.4343492 | 1.01 (0.93 - 1.09) | |  |  |
| cg01307483 | NRF1 | rs12706898 | 0.3821478 | 0.882034382 | 0.5890941 | 0.98 (0.92 - 1.03) | |  |  |
| cg14735364 | NRF1 | rs73159624 | 0.1793119 | 0.779540591 | 0.1517107 | 0.98 (0.96 - 1.01) | |  |  |
| cg14652524 | NRF1 | rs6957596 | 0.7243817 | 0.961946687 | 0.08883414 | 1 (0.98 - 1.02) | |  |  |
| cg16347123 | AKR1B1 | rs17185623 | 0.9748329 | 0.997273118 | 0.7606755 | 1 (0.9 - 1.11) |  |  |  |
| cg13159071 | AKR1B1 | rs10954455 | 0.7779041 | 0.969915661 | 0.5306259 | 1.01 (0.96 - 1.06) | |  |  |
| cg00174851 | AKR1B1 | rs1646764 | 0.7260957 | 0.962535985 | 0.7329287 | 0.98 (0.9 - 1.08) | |  |  |
| cg13056495 | AKR1B1 | rs156958 | 0.3644464 | 0.876694514 | 0.9050941 | 0.95 (0.85 - 1.06) | |  |  |
| cg09641325 | AKR1B1 | rs2974975 | 0.3139292 | 0.859468036 | 0.1399329 | 1.05 (0.95 - 1.16) | |  |  |
| cg12001930 | AKR1B10 | rs73164885 | 0.5566832 | 0.928702575 | 0.8741792 | 1.03 (0.93 - 1.14) | |  |  |
| cg09322278 | AKR1B15 | rs73164856 | 0.5359779 | 0.922827354 | 0.7159977 | 0.97 (0.87 - 1.08) | |  |  |
| cg03515829 | AKR1B15 | rs73164856 | 0.5341207 | 0.922711105 | 0.7237194 | 0.99 (0.97 - 1.02) | |  |  |
| cg06906464 | BPGM | rs68172609 | 0.4280802 | 0.895202761 | 0.9153677 | 0.99 (0.97 - 1.01) | |  |  |
| cg19858214 | BPGM | rs6966285 | 0.7098344 | 0.959271339 | 0.3861262 | 0.99 (0.95 - 1.03) | |  |  |
| cg27052537 | BPGM | rs6976742 | 0.06472156 | 0.654294619 | 0.5529741 | 0.88 (0.76 - 1.01) | |  |  |
| cg24133569 | BPGM | rs10224390 | 0.3588292 | 0.87454208 | 0.2291241 | 0.94 (0.84 - 1.07) | |  |  |
| cg01639775 | BPGM | rs73439942 | 0.2957583 | 0.855559075 | 0.5067499 | 1.02 (0.98 - 1.05) | |  |  |
| cg06024391 | BPGM | rs6467543 | 0.6950504 | 0.957244315 | 0.1749905 | 0.98 (0.87 - 1.1) | |  |  |
| cg23891049 | BPGM | rs17167985 | 0.07050527 | 0.664249985 | 0.1097549 | 0.98 (0.97 - 1) | |  |  |
| cg20242392 | DGKI | rs3800654 | 0.6673272 | 0.950857097 | 0.6540563 | 1.01 (0.96 - 1.07) | |  |  |
| cg20347666 | DGKI | rs2246546 | 0.4352248 | 0.897682982 | 0.1216015 | 1.02 (0.97 - 1.08) | |  |  |
| cg15463989 | DGKI | rs117105830 | 0.1949775 | 0.796038576 | 0.7864023 | 0.98 (0.95 - 1.01) | |  |  |
| cg21075678 | DGKI | rs12531271 | 0.283916 | 0.850417684 | 0.09729732 | 0.96 (0.9 - 1.03) | |  |  |
| cg05222850 | CREB3L2 | rs13228781 | 0.6158801 | 0.941100158 | 0.1790141 | 1.01 (0.98 - 1.04) | |  |  |
| cg09271097 | CREB3L2 | rs273988 | 0.2293295 | 0.820537304 | 0.2582064 | 0.98 (0.94 - 1.01) | |  |  |
| cg15975598 | CREB3L2 | rs28607939 | 0.8600228 | 0.98543533 | 0.5011723 | 1.01 (0.92 - 1.11) | |  |  |
| cg03304981 | CREB3L2 | rs75398593 | 0.9890763 | 0.998215646 | 0.8289401 | 1 (0.9 - 1.12) |  |  |  |
| cg13471756 | CREB3L2 | rs10954591 | 0.7487719 | 0.96647031 | 0.9544222 | 0.98 (0.88 - 1.1) | |  |  |
| cg00929565 | AKR1D1 | rs11772216 | 0.186366 | 0.78738552 | 0.3275727 | 0.96 (0.9 - 1.02) | |  |  |
| cg02216939 | AKR1D1 | rs117364453 | 0.8848615 | 0.987472366 | 0.9780039 | 1.01 (0.85 - 1.21) | |  |  |
| cg00445997 | TBXAS1 | rs141212865 | 0.5553949 | 0.928377941 | 0.7700637 | 1.03 (0.93 - 1.13) | |  |  |
| cg24286200 | TBXAS1 | rs4132077 | 0.5711971 | 0.931651393 | 0.4101484 | 1.04 (0.92 - 1.17) | |  |  |
| cg18317554 | TBXAS1 | rs7459106 | 0.5220085 | 0.919203511 | 0.2657094 | 0.98 (0.91 - 1.05) | |  |  |
| cg06750564 | TBXAS1 | rs2284207 | 0.8086295 | 0.975748771 | 0.9599176 | 0.99 (0.88 - 1.11) | |  |  |
| cg26022821 | AGK | rs1181728 | 0.3382209 | 0.867691593 | 0.01559159 | 0.95 (0.87 - 1.05) | |  |  |
| cg05253110 | AGK | rs74785948 | 0.1773026 | 0.777394452 | 0.158446 | 1.02 (0.99 - 1.04) | |  |  |
| cg23696214 | AGK | rs12671621 | 0.6021161 | 0.937895724 | 0.4504385 | 0.98 (0.92 - 1.05) | |  |  |
| cg06331595 | AGK | rs17492513 | 0.2300746 | 0.82066468 | 0.2060661 | 1.04 (0.98 - 1.1) | |  |  |
| cg26891873 | AGK | rs34654959 | 0.5458809 | 0.925678124 | 0.1446732 | 1.04 (0.92 - 1.17) | |  |  |
| cg09304653 | AGK | rs35677302 | 0.5689635 | 0.931577841 | 0.1148743 | 0.97 (0.88 - 1.07) | |  |  |
| cg07215947 | AGK | rs147640196 | 0.2422717 | 0.828524279 | 0.320486 | 1.04 (0.97 - 1.11) | |  |  |
| cg02051228 | ZNF467 | rs855646 | 0.6314449 | 0.944551386 | 0.4855164 | 0.98 (0.88 - 1.08) | |  |  |
| cg00453190 | ZNF467 | rs855665 | 0.1475911 | 0.751124071 | 0.8408737 | 1.03 (0.99 - 1.07) | |  |  |
| cg20215007 | ZNF467 | rs73481806 | 0.4804426 | 0.909116168 | 0.9194523 | 1.03 (0.95 - 1.12) | |  |  |
| cg23749760 | ZNF467 | rs709062 | 0.2494939 | 0.832463675 | 0.934094 | 0.96 (0.89 - 1.03) | |  |  |
| cg05601974 | SMARCD3 | rs921987 | 0.3581914 | 0.874493396 | 0.3790239 | 1.01 (0.98 - 1.05) | |  |  |
| cg02419716 | SMARCD3 | rs58125572 | 0.1602866 | 0.763771813 | 0.9286522 | 1.01 (0.99 - 1.03) | |  |  |
| cg01291336 | SMARCD3 | rs4472433 | 0.1262578 | 0.731173695 | 0.6039503 | 1.06 (0.98 - 1.14) | |  |  |
| cg07219227 | SMARCD3 | rs111988111 | 0.6891666 | 0.955819812 | 0.9449268 | 1.02 (0.93 - 1.12) | |  |  |
| cg27241639 | SMARCD3 | rs6953117 | 0.642737 | 0.94602473 | 0.9296136 | 0.97 (0.88 - 1.09) | |  |  |
| cg13047336 | SMARCD3 | rs369386 | 0.8254968 | 0.978725881 | 0.7551983 | 1.01 (0.92 - 1.12) | |  |  |
| cg01640945 | SMARCD3 | rs6964641 | 0.9411975 | 0.994700729 | 0.8519327 | 1 (0.96 - 1.04) | |  |  |
| cg02848456 | SMARCD3 | rs6964641 | 0.9411972 | 0.994700729 | 0.8449866 | 1 (0.97 - 1.03) | |  |  |
| cg18404559 | PRKAG2 | rs73478073 | 0.06245808 | 0.648424086 | 0.5798867 | 0.92 (0.84 - 1) | |  |  |
| cg19412964 | PRKAG2 | rs4726070 | 0.3198333 | 0.862134112 | 0.3411784 | 1.02 (0.98 - 1.05) | |  |  |
| cg09449988 | PRKAG2 | rs4726070 | 0.3199912 | 0.862134112 | 0.3332052 | 1.02 (0.98 - 1.06) | |  |  |
| cg01108370 | PRKAG2 | rs74558374 | 0.09282731 | 0.699096804 | 0.2608255 | 0.88 (0.76 - 1.02) | |  |  |
| cg01005180 | PRKAG2 | rs2727553 | 0.4626059 | 0.905088405 | 0.3765858 | 0.97 (0.9 - 1.05) | |  |  |
| cg22513396 | PRKAG2 | rs2536091 | 0.6912095 | 0.956420636 | 0.6572337 | 0.98 (0.87 - 1.1) | |  |  |
| cg23151649 | PRKAG2 | rs2727552 | 0.6786155 | 0.953528995 | 0.810024 | 1 (0.98 - 1.02) | |  |  |
| cg12978800 | PRKAG2 | rs2727563 | 0.9352573 | 0.994575934 | 0.07038577 | 1 (0.96 - 1.04) | |  |  |
| cg16391727 | PRKAG2 | rs2536075 | 0.7981051 | 0.973983941 | 0.009496633 | 0.99 (0.92 - 1.07) | |  |  |
| cg18633230 | PRKAG2 | rs6965926 | 0.3547149 | 0.872952434 | 0.3809333 | 1.05 (0.95 - 1.16) | |  |  |
| cg23351327 | PRKAG2 | rs76351165 | 0.205577 | 0.802570683 | 0.1440156 | 1.05 (0.98 - 1.12) | |  |  |
| cg01588379 | PRKAG2 | rs117728810 | 0.2167075 | 0.812366567 | 0.1496479 | 1.03 (0.98 - 1.08) | |  |  |
| cg09397579 | PRKAG2 | rs77307127 | 0.06813572 | 0.659237822 | 0.06327703 | 0.85 (0.72 - 1.01) | |  |  |
| cg13686795 | PRKAG2 | rs1108845 | 0.9020055 | 0.990758602 | 0.8731531 | 0.99 (0.87 - 1.13) | |  |  |
| cg12835599 | PRKAG2 | rs55858267 | 0.4997696 | 0.915335962 | 0.6222953 | 1.04 (0.93 - 1.16) | |  |  |
| cg05807157 | PRKAG2 | rs76549296 | 0.673187 | 0.9518494 | 0.5575141 | 1.02 (0.92 - 1.14) | |  |  |
| cg07804434 | PRKAG2 | rs73160032 | 0.4026806 | 0.887915136 | 0.2473767 | 1.01 (0.99 - 1.03) | |  |  |
| cg07132038 | PRKAG2 | rs76351165 | 0.204998 | 0.802207911 | 0.09524467 | 0.96 (0.9 - 1.02) | |  |  |
| cg05265143 | PRKAG2 | rs4272280 | 0.6368896 | 0.94495427 | 0.9314446 | 0.97 (0.87 - 1.09) | |  |  |
| cg18825427 | INSIG1 | rs73485895 | 0.9312237 | 0.993733866 | 0.9296896 | 0.99 (0.88 - 1.13) | |  |  |
| cg04811098 | INSIG1 | rs9690209 | 0.871761 | 0.986616213 | 0.8713226 | 1 (0.95 - 1.06) | |  |  |
| cg21341645 | INSIG1 | rs9769506 | 0.736015 | 0.964338341 | 0.5051222 | 1 (0.98 - 1.02) | |  |  |
| cg21528729 | INSIG1 | rs9719997 | 0.5236517 | 0.919887902 | 0.4529929 | 0.99 (0.94 - 1.03) | |  |  |
| cg00030005 | INSIG1 | rs9768380 | 0.5273712 | 0.921469744 | 0.3487103 | 0.98 (0.91 - 1.05) | |  |  |
| cg15614872 | ESYT2 | rs41271211 | 0.6471248 | 0.94603711 | 0.2016723 | 0.99 (0.96 - 1.03) | |  |  |
| cg26651303 | ESYT2 | rs2305476 | 0.9150328 | 0.992155808 | 0.4393249 | 1 (0.98 - 1.02) | |  |  |
| cg05212892 | ESYT2 | rs57686648 | 0.8558221 | 0.984734876 | 0.649769 | 0.99 (0.91 - 1.08) | |  |  |
| cg07600623 | ESYT2 | rs78357128 | 0.4673672 | 0.906442 | 0.3725225 | 0.97 (0.9 - 1.05) | |  |  |
| cg20533982 | ESYT2 | rs34277519 | 0.9431336 | 0.995163396 | 0.6641255 | 1 (0.93 - 1.08) | |  |  |
| cg13211008 | ESYT2 | rs710422 | 0.9814256 | 0.99749749 | 0.5992702 | 1 (0.98 - 1.02) | |  |  |
| cg26295559 | ESYT2 | rs10263059 | 0.4061372 | 0.889328194 | 0.4065979 | 1.02 (0.98 - 1.05) | |  |  |
| cg04574046 | ESYT2 | rs6459905 | 0.3898132 | 0.885957098 | 0.5875605 | 0.98 (0.93 - 1.03) | |  |  |
| cg06937201 | ESYT2 | rs13233513 | 0.4093287 | 0.890029484 | 0.5506718 | 0.98 (0.94 - 1.02) | |  |  |
| cg16762085 | ESYT2 | rs62480285 | 0.4120638 | 0.890660344 | 0.462293 | 0.98 (0.95 - 1.02) | |  |  |
| cg16068808 | ESYT2 | rs6944346 | 0.3812469 | 0.881767111 | 0.8441187 | 0.96 (0.87 - 1.06) | |  |  |
| cg06111140 | ESYT2 | rs35865957 | 0.4611573 | 0.904731628 | 0.6502893 | 0.96 (0.87 - 1.06) | |  |  |
| cg02427468 | ESYT2 | rs12698279 | 0.9537573 | 0.996245208 | 0.6765572 | 1 (0.88 - 1.12) | |  |  |
| cg16976520 | ESYT2 | rs7787431 | 0.3657468 | 0.877657227 | 0.1663021 | 1.02 (0.98 - 1.07) | |  |  |
| cg26517878 | ESYT2 | rs1189220 | 0.9807305 | 0.99749749 | 0.9700187 | 1 (0.89 - 1.12) | |  |  |
| cg07392702 | ESYT2 | rs10263059 | 0.4062887 | 0.889361175 | 0.378368 | 1.02 (0.98 - 1.06) | |  |  |
| cg05340744 | ESYT2 | rs842454 | 0.9601226 | 0.996245208 | 0.8401931 | 1 (0.98 - 1.02) | |  |  |
| cg19584649 | ESYT2 | rs62475608 | 0.7626987 | 0.967004307 | 0.8575246 | 1 (0.97 - 1.02) | |  |  |
| cg03765041 | ESYT2 | rs842432 | 0.4581654 | 0.903711216 | 0.5181225 | 0.96 (0.85 - 1.07) | |  |  |
| cg04677581 | ESYT2 | rs842439 | 0.9344163 | 0.994553361 | 0.9867502 | 1.01 (0.85 - 1.19) | |  |  |
| cg07608385 | AGPAT5 | rs1014199 | 0.9688292 | 0.997250487 | 0.8062605 | 1 (0.91 - 1.11) | |  |  |
| cg09293387 | AGPAT5 | rs71525762 | 0.8920241 | 0.989163184 | 0.2439724 | 0.99 (0.88 - 1.12) | |  |  |
| cg24378421 | MTMR9 | rs77810947 | 0.8750474 | 0.986942168 | 0.8834611 | 1.02 (0.83 - 1.24) | |  |  |
| cg21337580 | MTMR9 | rs77810947 | 0.8750438 | 0.986942168 | 0.8774685 | 1.02 (0.84 - 1.23) | |  |  |
| cg16649577 | FDFT1 | rs2645450 | 0.3395243 | 0.868140958 | 0.5451283 | 1.03 (0.97 - 1.11) | |  |  |
| cg09041527 | FDFT1 | rs2740449 | 0.1492122 | 0.752396486 | 0.4801434 | 1.08 (0.97 - 1.19) | |  |  |
| cg02840367 | FDFT1 | rs2645429 | 0.1437373 | 0.747350132 | 0.4940321 | 1.02 (0.99 - 1.05) | |  |  |
| cg21645268 | FDFT1 | rs1293299 | 0.1189732 | 0.722591737 | 0.736305 | 1.06 (0.99 - 1.13) | |  |  |
| cg11598005 | FDFT1 | rs1616534 | 0.9308429 | 0.99371844 | 0.1506047 | 1 (0.93 - 1.09) | |  |  |
| cg01402994 | FDFT1 | rs1616534 | 0.9308407 | 0.99371844 | 0.0706393 | 1 (0.95 - 1.05) | |  |  |
| cg13963446 | FDFT1 | rs1736060 | 0.7270993 | 0.962824869 | 0.4944232 | 1.01 (0.95 - 1.08) | |  |  |
| cg12568669 | FDFT1 | rs1616534 | 0.9308397 | 0.99371844 | 0.1113646 | 1 (0.98 - 1.02) | |  |  |
| cg12186771 | MTMR7 | rs1115809 | 0.1411743 | 0.744470115 | 0.05489877 | 0.96 (0.91 - 1.01) | |  |  |
| cg27315958 | MTMR7 | rs17587547 | 0.14303 | 0.746936609 | 0.04283327 | 0.98 (0.96 - 1.01) | |  |  |
| cg25964213 | MTMR7 | rs17587547 | 0.143678 | 0.74719908 | 0.1029811 | 1.03 (0.99 - 1.06) | |  |  |
| cg15852516 | MTMR7 | rs1557589 | 0.4829253 | 0.909795554 | 0.8254545 | 0.97 (0.89 - 1.06) | |  |  |
| cg06763054 | MTMR7 | rs1003299 | 0.4753313 | 0.908246703 | 0.9448621 | 0.98 (0.93 - 1.04) | |  |  |
| cg08231493 | MTMR7 | rs1557589 | 0.4817862 | 0.909462713 | 0.9039448 | 0.98 (0.93 - 1.04) | |  |  |
| cg23540819 | ASAH1 | rs35425490 | 0.05149243 | 0.628688355 | 0.3344946 | 1.17 (1 - 1.38) | |  |  |
| cg06891716 | ASAH1 | rs139001299 | 0.3053359 | 0.857248999 | 0.8765702 | 0.95 (0.86 - 1.05) | |  |  |
| cg04565547 | ASAH1 | rs139001299 | 0.3060669 | 0.857248999 | 0.47694 | 0.95 (0.86 - 1.05) | |  |  |
| cg06865273 | ASAH1 | rs2739693 | 0.3587583 | 0.87454208 | 0.3922213 | 1.08 (0.92 - 1.26) | |  |  |
| cg18929511 | ASAH1 | rs7387252 | 0.395361 | 0.886888842 | 0.04229555 | 0.99 (0.96 - 1.02) | |  |  |
| cg04912297 | ASAH1 | rs7387252 | 0.3954446 | 0.886906243 | 0.25414 | 0.99 (0.95 - 1.02) | |  |  |
| cg00471141 | LPL | rs148314176 | 0.5124372 | 0.91691468 | 0.401196 | 1.15 (0.76 - 1.73) | |  |  |
| cg07263235 | LPL | rs7016529 | 0.6479474 | 0.946222335 | 0.2506776 | 0.93 (0.7 - 1.25) | |  |  |
| cg22108175 | LPL | rs3900537 | 0.7632571 | 0.967128265 | 0.4707397 | 0.96 (0.73 - 1.26) | |  |  |
| cg20227326 | PPP2R2A | rs2271105 | 0.6028082 | 0.937895724 | 0.9407845 | 1.03 (0.92 - 1.15) | |  |  |
| cg00914787 | PPP2R2A | rs12676152 | 0.6260074 | 0.943336946 | 0.8452947 | 0.97 (0.88 - 1.08) | |  |  |
| cg12285565 | PPP2R2A | rs73231838 | 0.2818793 | 0.84970115 | 0.985717 | 1.04 (0.97 - 1.13) | |  |  |
| cg04675946 | PPP2R2A | rs2951975 | 0.119507 | 0.723725975 | 0.8013706 | 1.02 (0.99 - 1.05) | |  |  |
| cg17535550 | PPP2R2A | rs2976286 | 0.8566842 | 0.985006713 | 0.7515503 | 1.01 (0.94 - 1.07) | |  |  |
| cg19889626 | PPP2R2A | rs2976284 | 0.7393405 | 0.964522071 | 0.819453 | 1.01 (0.96 - 1.06) | |  |  |
| cg04064160 | PPP2R2A | rs2951975 | 0.1219097 | 0.727121215 | 0.914079 | 1.04 (0.99 - 1.1) | |  |  |
| cg20300502 | PPP2R2A | rs56270006 | 0.2602408 | 0.837722689 | 0.7084409 | 1.1 (0.93 - 1.31) | |  |  |
| cg17291136 | PPP2R2A | rs2624116 | 0.3468108 | 0.87105956 | 0.4269206 | 0.96 (0.88 - 1.05) | |  |  |
| cg17117160 | PPP2R2A | rs7840855 | 0.8411681 | 0.981698579 | 0.3618405 | 1 (0.95 - 1.04) | |  |  |
| cg08317834 | PPP2R2A | rs3808582 | 0.2645177 | 0.840431508 | 0.1634316 | 0.95 (0.86 - 1.04) | |  |  |
| cg13877285 | PPP2R2A | rs1825186 | 0.2523285 | 0.833663267 | 0.3018343 | 0.92 (0.8 - 1.06) | |  |  |
| cg22461835 | ADRA1A | rs7841405 | 0.07023668 | 0.664146758 | 0.9034057 | 1.11 (0.99 - 1.25) | |  |  |
| cg21437157 | EPHX2 | rs62504287 | 0.3499142 | 0.871823017 | 0.6128993 | 0.97 (0.91 - 1.04) | |  |  |
| cg25399743 | EPHX2 | rs36081056 | 0.662412 | 0.949760413 | 0.9918727 | 1.01 (0.97 - 1.04) | |  |  |
| cg21608792 | EPHX2 | rs6994778 | 0.3442515 | 0.870057356 | 0.9172513 | 0.97 (0.92 - 1.03) | |  |  |
| cg22099723 | EPHX2 | rs6994778 | 0.344582 | 0.870160803 | 0.8496569 | 0.97 (0.91 - 1.03) | |  |  |
| cg16411256 | EPHX2 | rs6994778 | 0.3461415 | 0.870727742 | 0.7632273 | 0.96 (0.87 - 1.05) | |  |  |
| cg24081819 | EPHX2 | rs6994778 | 0.3465029 | 0.870813682 | 0.979101 | 0.95 (0.86 - 1.05) | |  |  |
| cg04927725 | PPP2CB | rs78302453 | 0.5312529 | 0.92186639 | 0.1787807 | 1.04 (0.93 - 1.15) | |  |  |
| cg01386493 | ADRB3 | rs55896502 | 0.4200396 | 0.893012366 | 0.7468943 | 1.04 (0.94 - 1.16) | |  |  |
| cg19806221 | ADRB3 | rs55896502 | 0.4188854 | 0.892570769 | 0.6599175 | 1.03 (0.95 - 1.12) | |  |  |
| cg00432461 | ADRB3 | rs150979096 | 0.6032468 | 0.937895724 |  | 1.04 (0.9 - 1.2) | |  |  |
| cg04142296 | PLEKHA2 | rs77741182 | 0.7480694 | 0.966376944 | 0.9170906 | 1 (0.97 - 1.03) | |  |  |
| cg01785359 | PLEKHA2 | rs77741182 | 0.7480788 | 0.966376944 | 0.9510041 | 0.99 (0.96 - 1.03) | |  |  |
| cg25371169 | PLEKHA2 | rs77741182 | 0.7480831 | 0.966376944 | 0.9046793 | 0.99 (0.96 - 1.03) | |  |  |
| cg16536016 | PLEKHA2 | rs77741182 | 0.7480832 | 0.966376944 | 0.9284546 | 0.99 (0.96 - 1.03) | |  |  |
| cg01073837 | PLEKHA2 | rs77741182 | 0.7480841 | 0.966376944 | 0.9532629 | 0.99 (0.96 - 1.03) | |  |  |
| cg16866567 | PLEKHA2 | rs10081432 | 0.4138513 | 0.891430669 | 0.9476446 | 0.99 (0.97 - 1.01) | |  |  |
| cg24581462 | PLEKHA2 | rs77741182 | 0.7481457 | 0.966376944 | 0.8880945 | 0.99 (0.93 - 1.06) | |  |  |
| cg15717617 | PLEKHA2 | rs11783243 | 0.9360327 | 0.994575934 | 0.9311993 | 1 (0.98 - 1.02) | |  |  |
| cg12174341 | AGPAT6 | rs11986407 | 0.07387948 | 0.669220864 | 0.3173127 | 1.05 (1 - 1.11) | |  |  |
| cg18918321 | AGPAT6 | rs62509767 | 0.05783719 | 0.640493749 | 0.2510124 | 1.15 (1 - 1.33) | |  |  |
| cg22352078 | AGPAT6 | rs11987150 | 0.08593518 | 0.688259309 | 0.6944263 | 1.09 (0.99 - 1.2) | |  |  |
| cg05185040 | AGPAT6 | rs16890694 | 0.07713308 | 0.673224049 | 0.5633416 | 1.09 (0.99 - 1.2) | |  |  |
| cg25897519 | AGPAT6 | rs4078763 | 0.4192326 | 0.892683469 | 0.08934105 | 1.02 (0.98 - 1.06) | |  |  |
| cg09915099 | AGPAT6 | rs755552 | 0.8189018 | 0.977915512 | 0.2482429 | 1.01 (0.96 - 1.06) | |  |  |
| cg07745886 | IKBKB | rs17875700 | 0.7913885 | 0.972550862 | 0.528042 | 1.01 (0.93 - 1.1) | |  |  |
| cg06734962 | CEBPD | rs1524899 | 0.2878759 | 0.851771376 | 0.9562337 | 0.96 (0.9 - 1.03) | |  |  |
| cg23495695 | CEBPD | rs1524899 | 0.2868201 | 0.851477863 | 0.9689195 | 0.97 (0.92 - 1.02) | |  |  |
| cg21315018 | CEBPD | rs13251384 | 0.12236 | 0.727511471 | 0.9641331 | 0.96 (0.92 - 1.01) | |  |  |
| cg03066009 | CYP7B1 | rs35328846 | 0.2185563 | 0.814207724 | 0.7460707 | 0.99 (0.97 - 1.01) | |  |  |
| cg19424531 | CYP7B1 | rs4471086 | 0.5242501 | 0.920179466 | 0.8524456 | 1.04 (0.93 - 1.15) | |  |  |
| cg04220047 | CYP7B1 | rs7842714 | 0.09698004 | 0.702382651 | 0.02037865 | 1.08 (0.99 - 1.17) | |  |  |
| cg13335567 | NCOA2 | rs117222395 | 0.1689184 | 0.771017828 | 0.8711906 | 1.03 (0.99 - 1.08) | |  |  |
| cg14403241 | NCOA2 | rs17676138 | 0.2914641 | 0.853497657 | 0.4487436 | 0.94 (0.83 - 1.06) | |  |  |
| cg03706086 | NCOA2 | rs7832789 | 0.3375353 | 0.867614935 | 0.4612338 | 0.97 (0.92 - 1.03) | |  |  |
| cg01962077 | FABP5 | rs182703017 | 0.7801279 | 0.970357246 | 0.5525636 | 0.98 (0.85 - 1.13) | |  |  |
| cg05049003 | FABP12 | rs16909302 | 0.832009 | 0.980007378 | 0.0504751 | 1.01 (0.94 - 1.08) | |  |  |
| cg14412187 | FABP12 | rs10108348 | 0.9708485 | 0.997273118 | 0.7294703 | 1 (0.93 - 1.08) | |  |  |
| cg03961824 | IMPA1 | rs2955010 | 0.4783097 | 0.908965215 | 0.3651227 | 0.98 (0.93 - 1.03) | |  |  |
| cg16670359 | IMPA1 | rs3802143 | 0.691256 | 0.956420636 | 0.6181225 | 1.01 (0.95 - 1.08) | |  |  |
| cg05813297 | IMPA1 | rs10283161 | 0.9451507 | 0.995509667 | 0.4276641 | 1 (0.93 - 1.08) | |  |  |
| cg09438113 | IMPA1 | rs915 | 0.4926024 | 0.913294749 | 0.5690964 | 0.98 (0.92 - 1.04) | |  |  |
| cg00124004 | CPNE3 | rs10106855 | 0.2187651 | 0.814353912 | 0.5826684 | 1.05 (0.97 - 1.15) | |  |  |
| cg27040700 | DECR1 | rs2189619 | 0.3719197 | 0.879031675 | 0.3581597 | 1.05 (0.95 - 1.15) | |  |  |
| cg14914552 | PTDSS1 | rs9886481 | 0.1774119 | 0.777570739 | 0.8504799 | 1.05 (0.98 - 1.12) | |  |  |
| cg09267188 | PTDSS1 | rs6468500 | 0.2622387 | 0.838487694 | 0.7511326 | 1.06 (0.96 - 1.16) | |  |  |
| cg22138393 | PTDSS1 | rs13279499 | 0.7320947 | 0.963155736 | 0.3980249 | 1.02 (0.92 - 1.13) | |  |  |
| cg07364657 | PTDSS1 | rs2678336 | 0.1563488 | 0.759198659 | 0.7693523 | 0.98 (0.95 - 1.01) | |  |  |
| cg20128365 | MED30 | rs11992536 | 0.1443433 | 0.748260486 | 0.1775452 | 0.92 (0.82 - 1.03) | |  |  |
| cg23495116 | MED30 | rs11992536 | 0.1444365 | 0.748636756 | 0.2811934 | 0.92 (0.82 - 1.03) | |  |  |
| cg13995006 | MED30 | rs58062490 | 0.1551613 | 0.758116151 | 0.1661082 | 0.96 (0.91 - 1.02) | |  |  |
| cg09430518 | MED30 | rs1160120 | 0.558481 | 0.929283866 | 0.6781362 | 1.01 (0.97 - 1.05) | |  |  |
| cg09746261 | MED30 | rs7001018 | 0.5514012 | 0.926549937 | 0.4847048 | 1.02 (0.96 - 1.08) | |  |  |
| cg01874183 | ENPP2 | rs10090542 | 0.6259572 | 0.943316678 | 0.7222016 | 1.01 (0.96 - 1.08) | |  |  |
| cg07236691 | ENPP2 | rs66698379 | 0.1579836 | 0.761168536 | 0.9427452 | 0.94 (0.86 - 1.03) | |  |  |
| cg20048037 | ENPP2 | rs6989212 | 0.3473257 | 0.871113557 | 0.9735556 | 1.06 (0.94 - 1.19) | |  |  |
| cg23725583 | ENPP2 | rs4871419 | 0.4611727 | 0.904731628 | 0.7231509 | 0.96 (0.85 - 1.08) | |  |  |
| cg02534163 | ENPP2 | rs7840386 | 0.3861264 | 0.883589281 | 0.8768224 | 0.99 (0.96 - 1.02) | |  |  |
| cg04452959 | ENPP2 | rs965301 | 0.3813074 | 0.881767111 | 0.9549762 | 0.96 (0.87 - 1.06) | |  |  |
| cg22011731 | SQLE | rs15905 | 0.6241924 | 0.942996305 | 0.2086583 | 0.96 (0.8 - 1.15) | |  |  |
| cg09984392 | SQLE | rs10956230 | 0.621801 | 0.942375337 | 0.302106 | 0.97 (0.87 - 1.09) | |  |  |
| cg00285394 | SQLE | rs15905 | 0.623233 | 0.942908636 | 0.2235855 | 0.98 (0.9 - 1.06) | |  |  |
| cg12185975 | ADCY8 | rs76284985 | 0.7107421 | 0.95939651 | 0.04243028 | 1 (0.98 - 1.01) | |  |  |
| cg22304522 | ADCY8 | rs28380300 | 0.1832724 | 0.784465492 | 0.3511214 | 1.08 (0.96 - 1.21) | |  |  |
| cg08389266 | CYP11B1 | rs6431 | 0.3200183 | 0.862134112 | 0.9977693 | 0.96 (0.9 - 1.04) | |  |  |
| cg15847600 | CYP11B2 | rs3802230 | 0.3537182 | 0.872535566 | 0.9339882 | 1.03 (0.96 - 1.11) | |  |  |
| cg03513643 | DGAT1 | rs62532314 | 0.2905653 | 0.852852413 | 0.0652609 | 0.97 (0.93 - 1.02) | |  |  |
| cg06546677 | DGAT1 | rs4977219 | 0.2915406 | 0.853529268 | 0.06072131 | 1.02 (0.98 - 1.06) | |  |  |
| cg16752592 | DGAT1 | rs7388446 | 0.2363019 | 0.824439298 | 0.06532953 | 1.05 (0.97 - 1.13) | |  |  |
| cg13438334 | DGAT1 | rs7010550 | 0.2957745 | 0.855579482 | 0.09235385 | 1.06 (0.95 - 1.18) | |  |  |
| cg25027167 | DGAT1 | rs4977203 | 0.3132179 | 0.85912998 | 0.05760847 | 1.04 (0.97 - 1.12) | |  |  |
| cg11127482 | DGAT1 | rs4977203 | 0.3146461 | 0.860000178 | 0.07275394 | 1.05 (0.96 - 1.15) | |  |  |
| cg04661128 | PPAPDC2 | rs301469 | 0.6732043 | 0.9518494 | 0.356286 | 1.02 (0.94 - 1.1) | |  |  |
| cg13696752 | PPAPDC2 | rs6476884 | 0.6564239 | 0.947936792 | 0.2073628 | 0.99 (0.96 - 1.03) | |  |  |
| cg27204993 | PPAPDC2 | rs6476884 | 0.6564011 | 0.947936792 | 0.1349696 | 0.99 (0.96 - 1.02) | |  |  |
| cg13763482 | PPAPDC2 | rs7848239 | 0.4916524 | 0.913191516 | 0.07716777 | 0.99 (0.95 - 1.02) | |  |  |
| cg20394284 | JAK2 | rs10758669 | 0.2915405 | 0.853529268 | 0.877262 | 0.98 (0.94 - 1.02) | |  |  |
| cg03508284 | JAK2 | rs1887425 | 0.1732677 | 0.774561748 | 0.7874674 | 1.08 (0.97 - 1.21) | |  |  |
| cg13588086 | GLDC | rs34848653 | 0.84311 | 0.982261631 | 0.5027466 | 1.01 (0.94 - 1.07) | |  |  |
| cg13990947 | PLIN2 | rs2229536 | 0.07299856 | 0.668734227 | 0.3166449 | 1.03 (1 - 1.06) | |  |  |
| cg14628274 | ACER2 | rs10964131 | 0.3804227 | 0.881506989 | 0.01584678 | 1.04 (0.95 - 1.15) | |  |  |
| cg13983779 | ACER2 | rs10964151 | 0.4974593 | 0.914829912 | 0.8520033 | 1.02 (0.96 - 1.09) | |  |  |
| cg14498666 | PTPLAD2 | rs144216952 | 0.6971601 | 0.957319153 | 0.4811773 | 0.96 (0.77 - 1.19) | |  |  |
| cg13572911 | ACO1 | rs7866419 | 0.8358103 | 0.980661239 | 0.6055948 | 0.99 (0.91 - 1.08) | |  |  |
| cg13443165 | B4GALT1 | rs3780489 | 0.2264695 | 0.818302531 | 0.9110578 | 1.01 (0.99 - 1.03) | |  |  |
| cg21316772 | B4GALT1 | rs7043474 | 0.32924 | 0.864680234 | 0.8187027 | 1.05 (0.95 - 1.15) | |  |  |
| cg05779272 | B4GALT1 | rs10124479 | 0.2335372 | 0.822467683 | 0.7551635 | 1.07 (0.96 - 1.2) | |  |  |
| cg00833393 | CREB3 | rs3750437 | 0.7509345 | 0.96647031 | 0.00627497 | 0.99 (0.96 - 1.03) | |  |  |
| cg13838057 | GBA2 | rs138027525 | 0.541271 | 0.924201215 |  | 0.98 (0.92 - 1.04) | |  |  |
| cg14447369 | GNE | rs7046089 | 0.8980885 | 0.990106178 | 0.4309014 | 0.99 (0.86 - 1.15) | |  |  |
| cg21177599 | GNE | rs56701508 | 0.8981084 | 0.990106178 | 0.07862042 | 0.99 (0.84 - 1.16) | |  |  |
| cg26325209 | GNE | rs66464053 | 0.8983815 | 0.990106178 | 0.3674738 | 0.99 (0.83 - 1.17) | |  |  |
| cg24556026 | GNE | rs4879983 | 0.3233803 | 0.862596 | 0.714298 | 0.96 (0.9 - 1.04) | |  |  |
| cg25813936 | GNE | rs10114887 | 0.7914864 | 0.972550862 | 0.8392541 | 1 (0.97 - 1.02) | |  |  |
| cg05844977 | GNE | rs10114887 | 0.7916552 | 0.972566346 | 0.8906171 | 0.99 (0.88 - 1.1) | |  |  |
| cg14519323 | GRHPR | rs59967810 | 0.4128747 | 0.891061298 | 0.01598663 | 0.97 (0.89 - 1.05) | |  |  |
| cg14080227 | ALDH1B1 | rs10814683 | 0.95835 | 0.996245208 | 0.9221294 | 1 (0.89 - 1.12) | |  |  |
| cg13521538 | ALDH1B1 | rs9298976 | 0.4536616 | 0.902946589 | 0.3849428 | 1.04 (0.94 - 1.15) | |  |  |
| cg03237166 | ALDH1B1 | rs4646770 | 0.9729209 | 0.997273118 | 0.6863234 | 1 (0.93 - 1.08) | |  |  |
| cg13845561 | PRKACG | rs4745521 | 0.4671662 | 0.906202462 | 0.6225554 | 1.02 (0.97 - 1.07) | |  |  |
| cg14150378 | GNAQ | rs3858119 | 0.4734707 | 0.908168812 | 0.6200132 | 0.98 (0.91 - 1.04) | |  |  |
| cg14397813 | GNAQ | rs13291723 | 0.8836228 | 0.987421495 | 0.2314325 | 0.99 (0.91 - 1.09) | |  |  |
| cg14149552 | GNAQ | rs74867273 | 0.3424021 | 0.869637652 | 0.3704885 | 0.96 (0.89 - 1.04) | |  |  |
| cg12548454 | PSAT1 | rs17725890 | 0.547106 | 0.925949063 | 0.06934189 | 0.98 (0.94 - 1.03) | |  |  |
| cg13893799 | PSAT1 | rs11794244 | 0.03560767 | 0.581238266 | 0.006115057 | 1.04 (1 - 1.08) | |  |  |
| cg01865937 | SHC3 | rs1980888 | 0.560344 | 0.929984949 | 0.6191739 | 0.97 (0.87 - 1.08) | |  |  |
| cg14655569 | IPPK | rs10821000 | 0.3093756 | 0.858331832 | 0.2805746 | 0.99 (0.97 - 1.01) | |  |  |
| cg14184780 | IPPK | rs7037961 | 0.3039363 | 0.857248999 | 0.3257317 | 0.95 (0.85 - 1.05) | |  |  |
| cg14181777 | IPPK | rs10992402 | 0.3515079 | 0.872055283 | 0.3330533 | 0.96 (0.89 - 1.04) | |  |  |
| cg14350544 | FBP2 | rs149946076 | 0.6921849 | 0.95653054 | 0.09909905 | 0.96 (0.81 - 1.15) | |  |  |
| cg13493766 | FBP2 | rs10761345 | 0.7041711 | 0.958680302 | 0.8231657 | 0.99 (0.96 - 1.02) | |  |  |
| cg13740339 | FBP1 | rs28382863 | 0.9711971 | 0.997273118 | 0.8927869 | 1 (0.93 - 1.07) | |  |  |
| cg14211930 | FBP1 | rs499480 | 0.2915925 | 0.853529268 | 0.5144456 | 0.96 (0.88 - 1.04) | |  |  |
| cg06705237 | FBP1 | rs573212 | 0.2168005 | 0.812422206 | 0.3336252 | 0.95 (0.89 - 1.03) | |  |  |
| cg13487127 | FBP1 | rs10993289 | 0.6050679 | 0.938650397 | 0.977375 | 1.02 (0.94 - 1.11) | |  |  |
| cg05005332 | HSD17B3 | rs2987359 | 0.7494951 | 0.96647031 | 0.8192011 | 1.01 (0.96 - 1.06) | |  |  |
| cg01825213 | HSD17B3 | rs4306016 | 0.8136294 | 0.976406452 | 0.8241849 | 0.99 (0.95 - 1.04) | |  |  |
| cg19633863 | HSD17B3 | rs10122795 | 0.7611919 | 0.966957226 | 0.6166836 | 0.99 (0.95 - 1.04) | |  |  |
| cg21167269 | HSD17B3 | rs1886260 | 0.7124477 | 0.95939651 | 0.7744972 | 0.99 (0.96 - 1.03) | |  |  |
| cg16714096 | HSD17B3 | rs280659 | 0.727476 | 0.962973957 | 0.6987914 | 0.99 (0.95 - 1.04) | |  |  |
| cg14564793 | HSD17B3 | rs1886260 | 0.7126145 | 0.959449093 | 0.7746137 | 0.99 (0.92 - 1.06) | |  |  |
| cg14356530 | HSD17B3 | rs1119864 | 0.4160071 | 0.892056505 | 0.3172665 | 1.03 (0.95 - 1.12) | |  |  |
| cg14633704 | HSD17B3 | rs7848833 | 0.5339001 | 0.922711105 | 0.335337 | 1.01 (0.98 - 1.05) | |  |  |
| cg25640887 | NANS | rs6478563 | 0.7924893 | 0.972850081 | 0.2732819 | 1.02 (0.9 - 1.15) | |  |  |
| cg13527921 | NANS | rs10818454 | 0.5534037 | 0.927647265 | 0.2337129 | 1.01 (0.98 - 1.04) | |  |  |
| cg13568622 | ALDOB | rs75061787 | 0.9167761 | 0.992236069 | 0.5500812 | 1 (0.94 - 1.05) | |  |  |
| cg14019050 | ABCA1 | rs1800976 | 0.8900878 | 0.98883142 | 0.1898032 | 1 (0.98 - 1.03) | |  |  |
| cg13430450 | ABCA1 | rs2422493 | 0.983602 | 0.99749749 | 0.4167061 | 1 (0.91 - 1.1) |  |  |  |
| cg13889369 | SLC44A1 | rs170582 | 0.4080621 | 0.889736297 | 0.3677036 | 0.97 (0.92 - 1.04) | |  |  |
| cg15000827 | KLF4 | rs1934912 | 0.9833842 | 0.99749749 | 0.9598584 | 1 (0.95 - 1.05) | |  |  |
| cg14068184 | KLF4 | rs10759238 | 0.9271237 | 0.993111852 | 0.8994854 | 1 (0.98 - 1.02) | |  |  |
| cg03066050 | KLF4 | rs1319974 | 0.7057207 | 0.959060157 | 0.06548117 | 1 (0.97 - 1.02) | |  |  |
| cg14185918 | KLF4 | rs1319974 | 0.7057281 | 0.959060157 | 0.07867486 | 0.99 (0.97 - 1.02) | |  |  |
| cg14000676 | KLF4 | rs60149884 | 0.3268011 | 0.864112976 | 0.05199524 | 1.01 (0.99 - 1.02) | |  |  |
| cg13831329 | PTGR1 | rs7035109 | 0.7404224 | 0.964580518 | 0.01323445 | 0.99 (0.91 - 1.07) | |  |  |
| cg23964386 | PTGR1 | rs1475106 | 0.7237694 | 0.961740789 | 0.06387689 | 0.99 (0.96 - 1.03) | |  |  |
| cg14465583 | PTGR1 | rs7035109 | 0.7402471 | 0.964580518 | 0.06380204 | 0.99 (0.96 - 1.03) | |  |  |
| cg21191443 | PTGR1 | rs3739702 | 0.7428662 | 0.965455341 | 0.7596367 | 0.99 (0.94 - 1.05) | |  |  |
| cg13929323 | PTGR1 | rs10759502 | 0.7768388 | 0.969431508 | 0.1055319 | 1.01 (0.92 - 1.12) | |  |  |
| cg01472113 | UGCG | rs12380887 | 0.1118513 | 0.7137217 | 0.3413004 | 0.94 (0.88 - 1.01) | |  |  |
| cg14428669 | UGCG | rs72756229 | 0.2808617 | 0.848934664 | 0.5164753 | 0.98 (0.94 - 1.02) | |  |  |
| cg14278148 | UGCG | rs180672903 | 0.2211005 | 0.816043259 | 0.3106676 | 1.1 (0.95 - 1.27) | |  |  |
| cg03246694 | PTGS1 | rs146679609 | 0.09518868 | 0.70058811 | 0.05800606 | 1.08 (0.99 - 1.17) | |  |  |
| cg13646480 | PTGS1 | rs3793619 | 0.1036364 | 0.707034093 | 0.5318389 | 1.11 (0.98 - 1.27) | |  |  |
| cg13882285 | PTGS1 | rs7022025 | 0.1483723 | 0.751761558 | 0.899235 | 1.06 (0.98 - 1.15) | |  |  |
| cg14062643 | PIP5KL1 | rs3824527 | 0.7309586 | 0.963081502 | 0.6142865 | 0.98 (0.88 - 1.09) | |  |  |
| cg13721989 | PIP5KL1 | rs7032851 | 0.8032556 | 0.974853078 | 0.1680113 | 1.01 (0.94 - 1.09) | |  |  |
| cg02021127 | PIP5KL1 | rs75390484 | 0.7284424 | 0.962973957 | 0.1792077 | 1.02 (0.89 - 1.17) | |  |  |
| cg13668314 | PIP5KL1 | rs62585311 | 0.1967159 | 0.797658312 | 0.3512788 | 0.96 (0.91 - 1.02) | |  |  |
| cg13463176 | SLC27A4 | rs10123875 | 0.2143387 | 0.810702823 | 0.2475049 | 1.08 (0.95 - 1.23) | |  |  |
| cg25587233 | CRAT | rs10988209 | 0.3474818 | 0.871242332 | 0.7888374 | 0.94 (0.82 - 1.07) | |  |  |
| cg26805528 | CRAT | rs6478862 | 0.5313628 | 0.92186639 | 0.6928577 | 1.04 (0.93 - 1.16) | |  |  |
| cg03980231 | PTGES | rs6478914 | 0.6484505 | 0.946369178 | 0.2362722 | 1.02 (0.95 - 1.09) | |  |  |
| cg02118627 | PTGES | rs6478914 | 0.6490768 | 0.946438094 | 0.1781227 | 0.97 (0.86 - 1.1) | |  |  |
| cg13836311 | PTGES | rs2302821 | 0.1810592 | 0.781943047 | 0.4344378 | 1.03 (0.99 - 1.08) | |  |  |
| cg14230280 | PTGES | rs11788591 | 0.05696774 | 0.639416935 | 0.05956898 | 1.03 (1 - 1.07) | |  |  |
| cg26672426 | PTGES | rs10988496 | 0.780207 | 0.970397184 | 0.3342072 | 1.02 (0.91 - 1.14) | |  |  |
| cg13628444 | MED27 | rs9411336 | 0.4288532 | 0.895397951 | 0.7135594 | 0.96 (0.88 - 1.06) | |  |  |
| cg13455829 | MED22 | rs35314130 | 0.726103 | 0.962535985 | 0.8160161 | 1.02 (0.91 - 1.15) | |  |  |
| cg13613044 | RXRA | rs11185679 | 0.1103034 | 0.713119003 | 0.2011505 | 1.03 (0.99 - 1.07) | |  |  |
| cg13485366 | RXRA | rs4917346 | 0.5924999 | 0.93585134 | 0.9154567 | 1.03 (0.93 - 1.14) | |  |  |
| cg14321284 | RXRA | rs4917346 | 0.5915215 | 0.93585134 | 0.9682069 | 1.01 (0.97 - 1.06) | |  |  |
| cg13936846 | RXRA | rs3899272 | 0.8236583 | 0.978460266 | 0.7745391 | 0.99 (0.95 - 1.04) | |  |  |
| cg13689699 | RXRA | rs3818731 | 0.5561291 | 0.928547204 | 0.6407103 | 0.98 (0.92 - 1.04) | |  |  |
| cg14472716 | RXRA | rs12006435 | 0.4793509 | 0.908977855 | 0.8712169 | 1.01 (0.98 - 1.05) | |  |  |
| cg00753924 | RXRA | rs3132297 | 0.911645 | 0.991697329 | 0.0526704 | 1 (0.98 - 1.02) | |  |  |
| cg24164254 | RXRA | rs4842194 | 0.08209257 | 0.680750616 | 0.3788041 | 0.93 (0.86 - 1.01) | |  |  |
| cg13746518 | RXRA | rs1045570 | 0.9693928 | 0.997273118 | 0.1960008 | 1 (0.91 - 1.1) |  |  |  |
| cg13449257 | RXRA | rs3118552 | 0.4537045 | 0.902946589 | 0.2394211 | 1.05 (0.93 - 1.18) | |  |  |
| cg04522309 | RXRA | rs943428 | 0.8161176 | 0.976625344 | 0.266761 | 1.01 (0.92 - 1.12) | |  |  |
| cg13513157 | RXRA | rs3118558 | 0.2772385 | 0.847139056 | 0.3141998 | 0.95 (0.86 - 1.04) | |  |  |
| cg05290820 | RXRA | rs34703525 | 0.8769033 | 0.986942168 | 0.3223896 | 0.99 (0.92 - 1.08) | |  |  |
| cg14383828 | RXRA | rs62571282 | 0.4507006 | 0.902173641 | 0.4102761 | 0.96 (0.85 - 1.07) | |  |  |
| cg14047094 | RXRA | rs34703525 | 0.8769223 | 0.986942168 | 0.4182495 | 1.01 (0.91 - 1.12) | |  |  |
| cg26430027 | RXRA | rs34703525 | 0.8769187 | 0.986942168 | 0.5965656 | 1.01 (0.91 - 1.12) | |  |  |
| cg14507845 | RXRA | rs1536480 | 0.06423186 | 0.653083432 | 0.2502269 | 1.09 (0.99 - 1.2) | |  |  |
| cg13611204 | INPP5E | rs10781543 | 0.2031208 | 0.800821985 | 0.05061949 | 0.95 (0.89 - 1.03) | |  |  |
| cg03646214 | INPP5E | rs144166250 | 0.2457146 | 0.830315778 | 0.8930023 | 0.9 (0.75 - 1.08) | |  |  |
| cg13741927 | INPP5E | rs10781540 | 0.1267527 | 0.731699937 | 0.004738103 | 0.98 (0.96 - 1.01) | |  |  |
| cg14169450 | INPP5E | rs4379550 | 0.09608069 | 0.701241093 | 0.08466393 | 0.96 (0.91 - 1.01) | |  |  |
| cg14019695 | INPP5E | rs7851507 | 0.1821225 | 0.783388851 | 0.01861879 | 0.98 (0.95 - 1.01) | |  |  |
| cg14024579 | INPP5E | rs10870203 | 0.7996335 | 0.974366314 | 0.6914855 | 1.01 (0.93 - 1.1) | |  |  |
| cg18285951 | INPP5E | rs11793840 | 0.8918525 | 0.989163184 | 0.6324113 | 1.01 (0.87 - 1.17) | |  |  |
| cg03571320 | AGPAT2 | rs3812611 | 0.5214457 | 0.91890586 | 0.9045901 | 0.97 (0.88 - 1.06) | |  |  |
| cg15720535 | AGPAT2 | rs3812611 | 0.521436 | 0.91890586 | 0.9196287 | 0.97 (0.88 - 1.06) | |  |  |
| cg13422804 | AGPAT2 | rs3812611 | 0.5216207 | 0.918978169 | 0.9450586 | 0.97 (0.88 - 1.07) | |  |  |
| cg00518468 | AGPAT2 | rs914747 | 0.7521853 | 0.966701387 | 0.5084706 | 1.01 (0.94 - 1.09) | |  |  |
| cg14604066 | AGPAT2 | rs4880126 | 0.5347157 | 0.922711105 | 0.9563614 | 0.95 (0.81 - 1.12) | |  |  |
| cg14484844 | AGPAT2 | rs67516037 | 0.4315068 | 0.896400972 | 0.5580814 | 1.03 (0.96 - 1.1) | |  |  |
| cg26270899 | AGPAT2 | rs10870110 | 0.7769928 | 0.969431508 | 0.5442643 | 0.98 (0.86 - 1.12) | |  |  |
| cg13823169 | TRAF2 | rs10870140 | 0.6199317 | 0.941873277 | 0.5845685 | 1.02 (0.94 - 1.12) | |  |  |
| cg01999046 | TRAF2 | rs10747039 | 0.627728 | 0.94410485 | 0.5355861 | 0.99 (0.94 - 1.04) | |  |  |
| cg21236500 | TRAF2 | rs7869864 | 0.8409328 | 0.981558663 | 0.3901652 | 0.99 (0.88 - 1.11) | |  |  |
| cg13973788 | PTGDS | rs11793787 | 0.7057964 | 0.959060157 | 0.9490913 | 0.99 (0.97 - 1.02) | |  |  |
| cg02156769 | PTGDS | rs12343591 | 0.723394 | 0.961571031 | 0.8591672 | 0.99 (0.96 - 1.03) | |  |  |
| cg13796381 | PTGDS | rs10124249 | 0.6199469 | 0.941873277 | 0.9498996 | 0.98 (0.93 - 1.05) | |  |  |
| cg21240441 | PTGDS | rs3814499 | 0.8900773 | 0.98883142 | 0.7663088 | 1.01 (0.91 - 1.11) | |  |  |
| cg04582938 | UAP1L1 | rs1105834 | 0.4187896 | 0.892570769 | 0.6168191 | 0.97 (0.91 - 1.04) | |  |  |
| cg14006318 | UAP1L1 | rs41307440 | 0.4997107 | 0.915326593 | 0.6749805 | 0.96 (0.86 - 1.08) | |  |  |
| cg15396367 | UAP1L1 | rs1105834 | 0.418805 | 0.892570769 | 0.6541562 | 0.97 (0.91 - 1.04) | |  |  |
| cg00698575 | PNPLA7 | rs928046 | 0.7511703 | 0.966538629 | 0.199534 | 1.02 (0.91 - 1.14) | |  |  |
| cg11128045 | PNPLA7 | rs3750381 | 0.7790344 | 0.97006492 | 0.2336861 | 1.01 (0.93 - 1.1) | |  |  |
| cg04683830 | PNPLA7 | rs2259657 | 0.7919958 | 0.972665456 | 0.1685093 | 1.01 (0.91 - 1.13) | |  |  |
| cg08841552 | PNPLA7 | rs2259657 | 0.791919 | 0.972609563 | 0.08624262 | 0.99 (0.91 - 1.08) | |  |  |
| cg01111842 | PNPLA7 | rs2501556 | 0.5078338 | 0.91691468 | 0.09891356 | 1.04 (0.93 - 1.16) | |  |  |
| cg12494529 | IDI1 | rs56289911 | 0.5997891 | 0.937472002 | 0.8989627 | 0.98 (0.93 - 1.05) | |  |  |
| cg12421087 | IDI1 | rs7072554 | 0.5698053 | 0.931651393 | 0.8958674 | 1.01 (0.99 - 1.03) | |  |  |
| cg23359895 | IDI1 | rs11819178 | 0.2176838 | 0.813183229 | 0.00356441 | 1.06 (0.97 - 1.15) | |  |  |
| cg03875347 | IDI1 | rs1285 | 0.5050333 | 0.916420949 | 0.6200413 | 1.02 (0.96 - 1.09) | |  |  |
| cg19484183 | IDI1 | rs1285 | 0.504762 | 0.916317278 | 0.558898 | 1.02 (0.96 - 1.08) | |  |  |
| cg26445189 | IDI1 | rs11250244 | 0.8707208 | 0.986488328 | 0.3679374 | 1 (0.98 - 1.03) | |  |  |
| cg27426921 | PFKP | rs1334703 | 0.3035394 | 0.857248999 | 0.07892479 | 0.96 (0.9 - 1.03) | |  |  |
| cg14197503 | PFKP | rs10903857 | 0.2487705 | 0.831921333 | 0.05251916 | 1.07 (0.96 - 1.19) | |  |  |
| cg24888352 | PFKP | rs118017267 | 0.500799 | 0.91567183 | 0.4234124 | 0.97 (0.87 - 1.07) | |  |  |
| cg02904062 | PFKP | rs7913947 | 0.696019 | 0.957319153 | 0.3203387 | 1.02 (0.92 - 1.14) | |  |  |
| cg00941050 | PFKP | rs72776848 | 0.3452486 | 0.870260964 | 0.5343748 | 0.97 (0.9 - 1.04) | |  |  |
| cg19498112 | PFKP | rs7095637 | 0.9855343 | 0.997836182 | 0.53842 | 1 (0.96 - 1.04) | |  |  |
| cg14784372 | PFKP | rs7095637 | 0.9855343 | 0.997836182 | 0.5449835 | 1 (0.96 - 1.04) | |  |  |
| cg14824052 | PFKP | rs7095637 | 0.9855343 | 0.997836182 | 0.5298459 | 1 (0.97 - 1.03) | |  |  |
| cg01300641 | PFKP | rs7091014 | 0.5425953 | 0.924398295 | 0.16235 | 1.03 (0.94 - 1.12) | |  |  |
| cg23612849 | PFKP | rs1574318 | 0.93169 | 0.993733866 | 0.7013182 | 1 (0.91 - 1.09) | |  |  |
| cg03549227 | PFKP | rs1875168 | 0.09622969 | 0.701241093 | 0.7208139 | 0.95 (0.89 - 1.01) | |  |  |
| cg26254345 | PFKP | rs10794973 | 0.9465809 | 0.99572293 | 0.5282878 | 1 (0.97 - 1.03) | |  |  |
| cg11540016 | PFKP | rs7073091 | 0.2208082 | 0.816043259 | 0.6337992 | 0.96 (0.91 - 1.02) | |  |  |
| cg19766591 | PFKP | rs2454836 | 0.2622238 | 0.838487694 | 0.4336948 | 0.97 (0.93 - 1.02) | |  |  |
| cg03961510 | PFKP | rs7073091 | 0.221035 | 0.816043259 | 0.5895044 | 0.96 (0.9 - 1.02) | |  |  |
| cg06888406 | PFKP | rs7073091 | 0.2217985 | 0.816257756 | 0.6575166 | 0.96 (0.89 - 1.03) | |  |  |
| cg09115646 | PFKP | rs7087799 | 0.8409181 | 0.981553752 | 0.5194442 | 0.99 (0.94 - 1.05) | |  |  |
| cg24599598 | PFKP | rs10794973 | 0.9465812 | 0.99572293 | 0.5313719 | 1 (0.95 - 1.04) | |  |  |
| cg10144336 | PFKP | rs7095637 | 0.9855343 | 0.997836182 | 0.5452497 | 1 (0.96 - 1.05) | |  |  |
| cg00470641 | PFKP | rs11251681 | 0.8916894 | 0.989088558 | 0.9287794 | 1 (0.95 - 1.06) | |  |  |
| cg06188744 | PFKP | rs10903953 | 0.1738674 | 0.775034212 | 0.6791271 | 0.93 (0.85 - 1.03) | |  |  |
| cg27069691 | PFKP | rs11599851 | 0.1148477 | 0.718485491 | 0.6124224 | 1.05 (0.99 - 1.11) | |  |  |
| cg24754223 | PFKP | rs10903959 | 0.1692436 | 0.771068669 | 0.9561328 | 1.01 (0.99 - 1.03) | |  |  |
| cg17433678 | PFKP | rs2388595 | 0.6431401 | 0.94603711 | 0.6780565 | 1.01 (0.97 - 1.05) | |  |  |
| cg20327845 | PFKP | rs56882221 | 0.656596 | 0.947936792 | 0.8323381 | 0.99 (0.94 - 1.04) | |  |  |
| cg26644674 | PFKP | rs7074733 | 0.191184 | 0.791715531 | 0.682327 | 0.94 (0.85 - 1.03) | |  |  |
| cg04188920 | PFKP | rs7076989 | 0.5290188 | 0.921652415 | 0.4691889 | 0.97 (0.87 - 1.08) | |  |  |
| cg06902558 | PFKP | rs2388594 | 0.6444049 | 0.94603711 | 0.7165305 | 1.01 (0.97 - 1.04) | |  |  |
| cg20133200 | PFKP | rs2388595 | 0.6431332 | 0.94603711 | 0.623009 | 1.01 (0.97 - 1.05) | |  |  |
| cg10710457 | PFKP | rs56882221 | 0.6573622 | 0.948152488 | 0.9597418 | 0.97 (0.87 - 1.1) | |  |  |
| cg15228268 | PFKP | rs4881081 | 0.2580774 | 0.836471869 | 0.8448445 | 1.02 (0.99 - 1.05) | |  |  |
| cg14006650 | PFKP | rs2388569 | 0.4227291 | 0.893963397 | 0.6677333 | 0.99 (0.95 - 1.02) | |  |  |
| cg24260931 | PFKP | rs4271292 | 0.4429395 | 0.8997726 | 0.9351419 | 0.98 (0.94 - 1.03) | |  |  |
| cg13791224 | PFKP | rs9804219 | 0.8033825 | 0.974892934 | 0.8826271 | 0.99 (0.92 - 1.07) | |  |  |
| cg11218432 | PFKP | rs11251721 | 0.4248935 | 0.894382935 | 0.8582092 | 0.99 (0.97 - 1.01) | |  |  |
| cg23614816 | PFKP | rs1132173 | 0.2933704 | 0.854219439 | 0.8634226 | 1.01 (0.99 - 1.03) | |  |  |
| cg09139549 | PFKP | rs78296009 | 0.6412645 | 0.94546956 |  | 1.03 (0.92 - 1.14) | |  |  |
| cg00059240 | PFKP | rs2388594 | 0.6452147 | 0.94603711 | 0.763519 | 0.97 (0.87 - 1.09) | |  |  |
| cg05394294 | PFKP | rs2388553 | 0.2408824 | 0.827367802 | 0.4403122 | 0.93 (0.83 - 1.05) | |  |  |
| cg14068301 | PFKP | rs3829915 | 0.8875965 | 0.987799812 | 0.8908384 | 0.99 (0.91 - 1.09) | |  |  |
| cg05167655 | PFKP | rs9423460 | 0.7314583 | 0.963155736 | 0.7024448 | 1.01 (0.95 - 1.07) | |  |  |
| cg23840010 | PFKP | rs9423467 | 0.771369 | 0.96821934 | 0.6596677 | 0.98 (0.88 - 1.1) | |  |  |
| cg16397968 | PFKP | rs7896260 | 0.1183352 | 0.721588247 | 0.417342 | 0.99 (0.97 - 1) | |  |  |
| cg26769838 | PFKP | rs7896260 | 0.1202221 | 0.724678988 | 0.7520989 | 0.97 (0.92 - 1.01) | |  |  |
| cg26616526 | PFKP | rs7896260 | 0.1255941 | 0.730395132 | 0.3418797 | 1.07 (0.98 - 1.16) | |  |  |
| cg16324184 | PFKP | rs113999704 | 0.6246561 | 0.943111734 |  | 0.99 (0.96 - 1.03) | |  |  |
| cg19910231 | PFKP | rs7910054 | 0.769555 | 0.967861494 | 0.2307259 | 1.01 (0.93 - 1.1) | |  |  |
| cg23003961 | PFKP | rs7080240 | 0.8125548 | 0.976184863 | 0.8111255 | 1.01 (0.9 - 1.14) | |  |  |
| cg25978025 | PFKP | rs11251748 | 0.9570817 | 0.996245208 | 0.5037123 | 1 (0.88 - 1.13) | |  |  |
| cg16963373 | PFKP | rs7918368 | 0.8458152 | 0.982837243 | 0.4432138 | 1.01 (0.95 - 1.06) | |  |  |
| cg18166150 | PFKP | rs11251738 | 0.7466593 | 0.965993906 | 0.3560356 | 1.01 (0.95 - 1.08) | |  |  |
| cg15087907 | PFKP | rs11251737 | 0.746581 | 0.96595432 | 0.2982345 | 1.01 (0.97 - 1.05) | |  |  |
| cg10568634 | AKR1C1 | rs6650153 | 0.4803385 | 0.909109548 | 0.3716768 | 0.99 (0.96 - 1.02) | |  |  |
| cg18841653 | AKR1C2 | rs6650153 | 0.4804695 | 0.909116168 | 0.369189 | 0.99 (0.95 - 1.02) | |  |  |
| cg04683516 | AKR1C2 | rs12772460 | 0.5377662 | 0.922827354 | 0.6214581 | 0.99 (0.97 - 1.02) | |  |  |
| cg10158681 | AKR1C2 | rs7894134 | 0.9887734 | 0.998215646 | 0.2145536 | 1 (0.89 - 1.13) | |  |  |
| cg00863716 | AKR1C2 | rs141113316 | 0.1393059 | 0.742106605 | 0.09437797 | 1.12 (0.96 - 1.3) | |  |  |
| cg12530994 | AKR1C3 | rs10752003 | 0.06692761 | 0.657145675 | 0.701814 | 0.9 (0.81 - 1.01) | |  |  |
| cg11136592 | AKR1C4 | rs55695566 | 0.141117 | 0.744470115 | 0.6804719 | 1.02 (0.99 - 1.04) | |  |  |
| cg20130789 | AKR1C4 | rs140107293 | 0.2570005 | 0.836025986 | 0.3824014 | 1.04 (0.97 - 1.12) | |  |  |
| cg02318043 | AKR1C4 | rs72772224 | 0.1233389 | 0.728697209 | 0.8096242 | 1.09 (0.98 - 1.2) | |  |  |
| cg17191567 | PFKFB3 | rs12219630 | 0.08407849 | 0.68633644 | 0.3180198 | 1.02 (1 - 1.04) | |  |  |
| cg04189187 | PFKFB3 | rs4749959 | 0.2243978 | 0.816922402 | 0.2235747 | 0.93 (0.83 - 1.04) | |  |  |
| cg18989491 | PFKFB3 | rs61839726 | 0.9077495 | 0.99097002 | 0.8107913 | 1 (0.94 - 1.06) | |  |  |
| cg22692545 | PFKFB3 | rs10905862 | 0.8451815 | 0.982663399 | 0.02149811 | 0.99 (0.92 - 1.07) | |  |  |
| cg26870438 | PFKFB3 | rs7099083 | 0.09149927 | 0.698333861 | 0.6400416 | 0.92 (0.83 - 1.01) | |  |  |
| cg18262201 | PFKFB3 | rs592866 | 0.2917437 | 0.853529268 | 0.6971062 | 1.02 (0.98 - 1.06) | |  |  |
| cg03555710 | PFKFB3 | rs77782465 | 0.3141237 | 0.859718577 | 0.08016357 | 1.05 (0.95 - 1.17) | |  |  |
| cg12664173 | PFKFB3 | rs584797 | 0.8316646 | 0.97983382 | 0.629605 | 1.01 (0.91 - 1.13) | |  |  |
| cg22224625 | PFKFB3 | rs11257229 | 0.1046179 | 0.707607634 | 0.1362316 | 1.09 (0.98 - 1.2) | |  |  |
| cg24283621 | PFKFB3 | rs2794981 | 0.9651033 | 0.996582049 | 0.144054 | 1 (0.89 - 1.11) | |  |  |
| cg01467100 | PFKFB3 | rs3793715 | 0.3977915 | 0.887037757 | 0.4367483 | 1.01 (0.98 - 1.05) | |  |  |
| cg27545615 | PFKFB3 | rs56222692 | 0.4132225 | 0.891061298 | 0.2360589 | 1.05 (0.94 - 1.17) | |  |  |
| cg12235073 | PFKFB3 | rs3793721 | 0.03887451 | 0.594052297 |  | 1.06 (1 - 1.12) | |  |  |
| cg07102808 | PFKFB3 | rs1539232 | 0.7686408 | 0.967537324 | 0.7755323 | 1.01 (0.92 - 1.12) | |  |  |
| cg01389728 | PRKCQ | rs7081898 | 0.827255 | 0.979185963 | 0.7616937 | 1 (0.95 - 1.04) | |  |  |
| cg15259864 | PRKCQ | rs943451 | 0.1321609 | 0.73629803 |  | 1.05 (0.98 - 1.13) | |  |  |
| cg24005158 | PHYH | rs7900830 | 0.09243223 | 0.698451712 | 0.6668182 | 0.94 (0.88 - 1.01) | |  |  |
| cg19018267 | PHYH | rs1058596 | 0.1497055 | 0.753004869 | 0.7048839 | 1.03 (0.99 - 1.08) | |  |  |
| cg11115427 | PHYH | rs6602647 | 0.6933091 | 0.956679152 | 0.4994068 | 0.99 (0.95 - 1.04) | |  |  |
| cg15529532 | OLAH | rs12250629 | 0.5687582 | 0.931511611 | 0.7807453 | 0.98 (0.9 - 1.06) | |  |  |
| cg00555393 | OLAH | rs12250629 | 0.5683521 | 0.931478694 | 0.7513282 | 0.98 (0.93 - 1.04) | |  |  |
| cg06224017 | ACBD7 | rs7912191 | 0.3242384 | 0.862797422 | 0.4728096 | 1.02 (0.98 - 1.07) | |  |  |
| cg02317321 | ACBD7 | rs11259480 | 0.4957855 | 0.914192976 | 0.7127408 | 1.05 (0.91 - 1.2) | |  |  |
| cg00939682 | CUBN | rs2669149 | 0.5348493 | 0.922711105 | 0.06731846 | 1.01 (0.98 - 1.05) | |  |  |
| cg24571822 | CUBN | rs1707278 | 0.5690583 | 0.931577841 | 0.888003 | 1.01 (0.97 - 1.07) | |  |  |
| cg16904399 | PIP4K2A | rs74362118 | 0.2868075 | 0.851477863 | 0.106271 | 0.95 (0.86 - 1.04) | |  |  |
| cg20641026 | PIP4K2A | rs1778342 | 0.3157299 | 0.860533702 | 0.2864838 | 0.96 (0.89 - 1.04) | |  |  |
| cg26872151 | PIP4K2A | rs1326341 | 0.05370396 | 0.634496461 | 0.1170051 | 0.92 (0.85 - 1) | |  |  |
| cg04813697 | PIP4K2A | rs1171500 | 0.5541513 | 0.927762756 | 0.1314049 | 0.96 (0.85 - 1.09) | |  |  |
| cg23017573 | PIP4K2A | rs1778335 | 0.2925228 | 0.853597299 | 0.2157176 | 1.01 (0.99 - 1.04) | |  |  |
| cg25178565 | PIP4K2A | rs12266181 | 0.6202166 | 0.942102119 | 0.03572986 | 0.97 (0.87 - 1.09) | |  |  |
| cg09216670 | PIP4K2A | rs12778869 | 0.335681 | 0.867144247 | 0.1931045 | 0.96 (0.87 - 1.05) | |  |  |
| cg19542707 | GAD2 | rs77828234 | 0.5194341 | 0.918429388 | 0.03531887 | 0.97 (0.88 - 1.07) | |  |  |
| cg14240646 | ACBD5 | rs1148167 | 0.9701542 | 0.997273118 | 0.7214554 | 1 (0.98 - 1.02) | |  |  |
| cg14514237 | ALOX5 | rs11511619 | 0.7530615 | 0.966809685 | 0.8933434 | 1.02 (0.92 - 1.12) | |  |  |
| cg02070873 | ALOX5 | rs4987105 | 0.7363596 | 0.964338341 | 0.8814177 | 0.99 (0.96 - 1.03) | |  |  |
| cg06935264 | ALOX5 | rs12354994 | 0.7017392 | 0.958325144 | 0.8908918 | 0.99 (0.94 - 1.05) | |  |  |
| cg19021328 | ALOX5 | rs11511619 | 0.7530235 | 0.966809685 | 0.797542 | 0.98 (0.89 - 1.08) | |  |  |
| cg27243389 | ALOX5 | rs4987105 | 0.7366631 | 0.964349971 | 0.8264376 | 0.98 (0.9 - 1.08) | |  |  |
| cg05026102 | ALOX5 | rs72784580 | 0.2870191 | 0.8514822 | 0.7786858 | 0.95 (0.86 - 1.05) | |  |  |
| cg15590007 | ALOX5 | rs4987105 | 0.7363289 | 0.964338341 | 0.9230152 | 1 (0.98 - 1.02) | |  |  |
| cg05241265 | MAPK8 | rs7075976 | 0.8649549 | 0.985783659 | 0.5005592 | 1 (0.94 - 1.05) | |  |  |
| cg25155846 | CHAT | rs7903315 | 0.4467187 | 0.901153799 | 0.64943 | 0.96 (0.86 - 1.07) | |  |  |
| cg02949574 | CHAT | rs77066892 | 0.9374448 | 0.994653626 | 0.6286703 | 1 (0.94 - 1.06) | |  |  |
| cg17413149 | OGDHL | rs1258177 | 0.755019 | 0.966870715 | 0.7911507 | 0.99 (0.91 - 1.07) | |  |  |
| cg05497289 | OGDHL | rs75100229 | 0.7575082 | 0.966870715 | 0.6942642 | 1.02 (0.89 - 1.17) | |  |  |
| cg11343657 | OGDHL | rs1258190 | 0.6606036 | 0.949189359 | 0.8366975 | 1.02 (0.95 - 1.09) | |  |  |
| cg22645355 | ASAH2 | rs2813305 | 0.3222869 | 0.862390108 | 0.5228749 | 1.01 (0.99 - 1.03) | |  |  |
| cg11508429 | SGMS1 | rs10082515 | 0.4147841 | 0.891660557 |  | 1.04 (0.95 - 1.13) | |  |  |
| cg10208594 | SGMS1 | rs77647822 | 0.9406893 | 0.994700729 | 0.9881931 | 1 (0.93 - 1.09) | |  |  |
| cg04004590 | PRKG1 | rs2186146 | 0.8967671 | 0.990106178 | 0.8990801 | 1 (0.95 - 1.06) | |  |  |
| cg05396900 | PRKG1 | rs2186146 | 0.8967796 | 0.990106178 | 0.9043331 | 1.01 (0.91 - 1.11) | |  |  |
| cg13719243 | PRKG1 | rs6480581 | 0.913195 | 0.991697329 | 0.8003464 | 1 (0.92 - 1.1) |  |  |  |
| cg22611504 | PRKG1 | rs6480581 | 0.9131907 | 0.991697329 | 0.8356106 | 1 (0.94 - 1.07) | |  |  |
| cg19242923 | PRKG1 | rs191727181 | 0.7132311 | 0.959685402 | 0.8834917 | 0.99 (0.93 - 1.05) | |  |  |
| cg11175150 | PRKG1 | rs2186146 | 0.8967645 | 0.990106178 | 0.8332406 | 1 (0.96 - 1.04) | |  |  |
| cg19219423 | PRKG1 | rs2186146 | 0.8967677 | 0.990106178 | 0.8588267 | 1 (0.94 - 1.05) | |  |  |
| cg23828595 | PRKG1 | rs2186146 | 0.8967744 | 0.990106178 | 0.844647 | 1.01 (0.93 - 1.09) | |  |  |
| cg02731293 | PRKG1 | rs145893507 | 0.07521382 | 0.671574612 |  | 0.93 (0.85 - 1.01) | |  |  |
| cg20416031 | PRKG1 | rs6480583 | 0.9212917 | 0.992834101 | 0.8436804 | 1 (0.91 - 1.11) | |  |  |
| cg07934217 | PRKG1 | rs12253079 | 0.5498378 | 0.926134313 | 0.5080791 | 0.96 (0.85 - 1.09) | |  |  |
| cg05867154 | PRKG1 | rs2154281 | 0.8905723 | 0.988958406 | 0.76828 | 1 (0.96 - 1.04) | |  |  |
| cg26332926 | PRKG1 | rs2186146 | 0.8967629 | 0.990106178 | 0.8095362 | 1 (0.97 - 1.03) | |  |  |
| cg24609819 | PRKG1 | rs7074573 | 0.4359938 | 0.897991331 | 0.835508 | 1.01 (0.99 - 1.03) | |  |  |
| cg11229663 | PRKG1 | rs2186146 | 0.896763 | 0.990106178 | 0.8152184 | 1 (0.97 - 1.03) | |  |  |
| cg17079497 | PRKG1 | rs2186146 | 0.8967744 | 0.990106178 | 0.8952875 | 0.99 (0.92 - 1.08) | |  |  |
| cg14500854 | PRKG1 | rs1937679 | 0.3885001 | 0.885274908 | 0.9375575 | 0.96 (0.89 - 1.05) | |  |  |
| cg04335523 | PRKG1 | rs10733891 | 0.1491968 | 0.752396486 | 0.1886891 | 0.97 (0.93 - 1.01) | |  |  |
| cg13792641 | PRKG1 | rs2186146 | 0.8967671 | 0.990106178 | 0.9147551 | 1 (0.94 - 1.05) | |  |  |
| cg11964006 | PRKG1 | rs2186146 | 0.8967704 | 0.990106178 | 0.901953 | 1 (0.93 - 1.07) | |  |  |
| cg07188896 | IPMK | rs6481331 | 0.3869575 | 0.884085477 | 0.6069859 | 0.95 (0.86 - 1.06) | |  |  |
| cg19528373 | IPMK | rs185781989 | 0.7864119 | 0.972210112 | 0.08168812 | 0.97 (0.77 - 1.22) | |  |  |
| cg22903908 | EGR2 | rs752602 | 0.7764153 | 0.969418773 | 0.1502623 | 0.99 (0.93 - 1.06) | |  |  |
| cg01332279 | EGR2 | rs752602 | 0.7765219 | 0.969429604 | 0.2730436 | 0.99 (0.89 - 1.09) | |  |  |
| cg10601026 | EGR2 | rs7076924 | 0.2331506 | 0.822440991 | 0.3652727 | 0.94 (0.86 - 1.04) | |  |  |
| cg27074971 | HK1 | rs79753049 | 0.2051555 | 0.802336547 | 0.9563435 | 1.03 (0.99 - 1.07) | |  |  |
| cg23177739 | HK1 | rs7067730 | 0.05912448 | 0.642132015 | 0.7814909 | 0.96 (0.91 - 1) | |  |  |
| cg22679940 | HK1 | rs79717056 | 0.9104447 | 0.991605129 | 0.3364694 | 1 (0.91 - 1.09) | |  |  |
| cg15358372 | HK1 | rs149310859 | 0.6499008 | 0.946719733 | 0.8212254 | 1.02 (0.95 - 1.08) | |  |  |
| cg00542261 | HK1 | rs141792676 | 0.1634253 | 0.765425752 | 0.7884536 | 0.96 (0.9 - 1.02) | |  |  |
| cg05824757 | SGPL1 | rs78707107 | 0.8161696 | 0.976633963 | 0.5664269 | 1.01 (0.92 - 1.12) | |  |  |
| cg00527653 | SGPL1 | rs11597530 | 0.2376926 | 0.825157381 | 0.2290904 | 1.07 (0.96 - 1.2) | |  |  |
| cg15420153 | SGPL1 | rs113882125 | 0.2421718 | 0.828498948 | 0.3410018 | 1.05 (0.97 - 1.13) | |  |  |
| cg06340768 | SGPL1 | rs11599687 | 0.1749218 | 0.775634303 | 0.5123721 | 0.9 (0.78 - 1.05) | |  |  |
| cg00244894 | PSAP | rs2070188 | 0.4877674 | 0.911772645 | 0.5051248 | 0.98 (0.91 - 1.05) | |  |  |
| cg25430995 | PSAP | rs74234126 | 0.20996 | 0.807456134 | 0.4384035 | 1.03 (0.98 - 1.08) | |  |  |
| cg19072957 | MINPP1 | rs7100988 | 0.3314701 | 0.865666848 | 0.01957966 | 0.99 (0.97 - 1.01) | |  |  |
| cg02022481 | CH25H | rs4511206 | 0.4514952 | 0.902173641 | 0.3463551 | 0.98 (0.94 - 1.03) | |  |  |
| cg13931663 | LIPA | rs2297473 | 0.3314899 | 0.865666848 | 0.4281181 | 0.98 (0.93 - 1.02) | |  |  |
| cg12555086 | LIPA | rs1412445 | 0.1319944 | 0.736134058 | 0.6053036 | 1.02 (0.99 - 1.04) | |  |  |
| cg12529006 | LIPA | rs77414759 | 0.4101888 | 0.890142955 | 0.8148913 | 0.98 (0.95 - 1.02) | |  |  |
| cg15406666 | LIPA | rs2243548 | 0.07183588 | 0.667498098 | 0.8765111 | 1.09 (0.99 - 1.19) | |  |  |
| cg16398628 | LIPA | rs2250781 | 0.06580298 | 0.655800616 | 0.905977 | 0.97 (0.95 - 1) | |  |  |
| cg11772224 | LIPA | rs2250781 | 0.07028678 | 0.664146758 | 0.9736094 | 0.93 (0.87 - 1.01) | |  |  |
| cg01355957 | LIPA | rs303171 | 0.9633511 | 0.996245208 | 0.6295736 | 1 (0.98 - 1.02) | |  |  |
| cg13172359 | LIPA | rs304450 | 0.9956052 | 0.99909171 | 0.7141665 | 1 (0.98 - 1.02) | |  |  |
| cg20178924 | ANKRD1 | rs10881868 | 0.0853149 | 0.687844545 | 0.8690448 | 0.96 (0.92 - 1.01) | |  |  |
| cg01262952 | ANKRD1 | rs9664170 | 0.08328305 | 0.68440758 | 0.7242431 | 0.97 (0.95 - 1) | |  |  |
| cg23413475 | PLCE1 | rs17109608 | 0.2360716 | 0.82430013 | 0.275629 | 1.06 (0.96 - 1.18) | |  |  |
| cg06539629 | PLCE1 | rs112692056 | 0.9433496 | 0.995184323 | 0.4025965 | 1 (0.93 - 1.08) | |  |  |
| cg14741153 | PLCE1 | rs12772469 | 0.5267094 | 0.921229393 | 0.2785519 | 1.04 (0.93 - 1.15) | |  |  |
| cg16986921 | PLCE1 | rs12772469 | 0.5256389 | 0.920778908 | 0.3405634 | 1.02 (0.95 - 1.1) | |  |  |
| cg03013070 | PLCE1 | rs2949004 | 0.232109 | 0.821680169 | 0.2264198 | 0.93 (0.83 - 1.05) | |  |  |
| cg00051662 | CYP2C19 | rs145411264 | 0.9744987 | 0.997273118 | 0.0762658 | 1 (0.91 - 1.1) |  |  |  |
| cg04189838 | CYP2C19 | rs145411264 | 0.9744984 | 0.997273118 | 0.04869079 | 1 (0.96 - 1.04) | |  |  |
| cg04248373 | SORBS1 | rs75618826 | 0.08763698 | 0.691807843 | 0.2161965 | 1.06 (0.99 - 1.14) | |  |  |
| cg16223436 | SORBS1 | rs943543 | 0.05267994 | 0.631346975 | 0.2734326 | 0.91 (0.82 - 1) | |  |  |
| cg18318006 | SORBS1 | rs11545359 | 0.06897983 | 0.661210145 | 0.01127071 | 1.09 (0.99 - 1.19) | |  |  |
| cg03190891 | SORBS1 | rs7070798 | 0.3720903 | 0.87916487 | 0.9047294 | 1.05 (0.95 - 1.16) | |  |  |
| cg27065896 | SORBS1 | rs7099805 | 0.6649681 | 0.950287969 | 0.03072475 | 0.98 (0.92 - 1.06) | |  |  |
| cg09780955 | SORBS1 | rs7070798 | 0.3709296 | 0.878517937 | 0.9516626 | 0.96 (0.88 - 1.05) | |  |  |
| cg05998513 | SORBS1 | rs117911885 | 0.9346167 | 0.994553361 | 0.06272125 | 1 (0.91 - 1.09) | |  |  |
| cg25604594 | PI4K2A | rs7902642 | 0.2273512 | 0.818961922 | 0.7497435 | 0.95 (0.88 - 1.03) | |  |  |
| cg25397029 | PI4K2A | rs12221474 | 0.1798129 | 0.780089799 | 0.7591529 | 0.95 (0.88 - 1.03) | |  |  |
| cg22862961 | PI4K2A | rs2282373 | 0.5935774 | 0.93585134 | 0.539 | 1.03 (0.93 - 1.13) | |  |  |
| cg25079847 | PI4K2A | rs12774288 | 0.2151668 | 0.811361421 | 0.7741086 | 1.06 (0.96 - 1.17) | |  |  |
| cg10987705 | PI4K2A | rs11189303 | 0.5241859 | 0.920172297 | 0.3329043 | 1.02 (0.96 - 1.09) | |  |  |
| cg05994982 | PI4K2A | rs11189310 | 0.4451113 | 0.900701183 | 0.4399559 | 1.02 (0.97 - 1.06) | |  |  |
| cg17001106 | PI4K2A | rs3750562 | 0.3898563 | 0.885969892 | 0.7406492 | 1.05 (0.94 - 1.17) | |  |  |
| cg05917963 | CHUK | rs7068456 | 0.9578521 | 0.996245208 | 0.5496844 | 1 (0.84 - 1.2) |  |  |  |
| cg01413281 | CHUK | rs17883397 | 0.3277668 | 0.864357645 | 0.01619051 | 0.98 (0.93 - 1.02) | |  |  |
| cg12714759 | SCD | rs7069475 | 0.2522356 | 0.833663267 | 0.7348335 | 0.94 (0.85 - 1.04) | |  |  |
| cg26351966 | SCD | rs670213 | 0.08025222 | 0.678133539 | 0.5110942 | 0.98 (0.95 - 1) | |  |  |
| cg00954566 | SCD | rs117026051 | 0.5205389 | 0.918602233 | 0.6864557 | 0.99 (0.94 - 1.03) | |  |  |
| cg10507965 | SCD | rs1054411 | 0.2807756 | 0.848934664 | 0.4735871 | 1.01 (0.99 - 1.03) | |  |  |
| cg18328965 | SCD | rs11190478 | 0.2472552 | 0.830818634 | 0.7018545 | 0.97 (0.92 - 1.02) | |  |  |
| cg24503796 | SCD | rs735877 | 0.2429467 | 0.828928244 | 0.7068279 | 0.98 (0.94 - 1.02) | |  |  |
| cg03440556 | SCD | rs683854 | 0.2334081 | 0.822444625 | 0.7969714 | 0.98 (0.94 - 1.01) | |  |  |
| cg16744911 | SCD | rs683854 | 0.2354859 | 0.823633766 | 0.72257 | 0.96 (0.9 - 1.03) | |  |  |
| cg11176415 | ELOVL3 | rs12773990 | 0.8372094 | 0.980963125 | 0.1919631 | 1.02 (0.88 - 1.18) | |  |  |
| cg05200540 | ELOVL3 | rs61874857 | 0.3485344 | 0.871588924 | 0.1095662 | 0.97 (0.91 - 1.03) | |  |  |
| cg24362923 | ELOVL3 | rs61874857 | 0.3487216 | 0.871671988 | 0.1845416 | 0.97 (0.9 - 1.04) | |  |  |
| cg01479818 | ELOVL3 | rs61874857 | 0.3505468 | 0.872055283 | 0.1813208 | 0.95 (0.86 - 1.06) | |  |  |
| cg23093090 | CYP17A1 | rs284858 | 0.8614023 | 0.985444341 | 0.2673674 | 1 (0.97 - 1.03) | |  |  |
| cg09201719 | CYP17A1 | rs12241517 | 0.5159727 | 0.917591527 | 0.892251 | 0.96 (0.85 - 1.08) | |  |  |
| cg10869957 | CYP17A1 | rs7089422 | 0.7228273 | 0.961554924 | 0.6987395 | 0.99 (0.94 - 1.04) | |  |  |
| cg25040937 | GPAM | rs12245952 | 0.8737705 | 0.986724534 | 0.04557635 | 1.01 (0.94 - 1.07) | |  |  |
| cg24461194 | GPAM | rs1962270 | 0.5238683 | 0.91990728 | 0.02760412 | 1.02 (0.96 - 1.09) | |  |  |
| cg13333374 | ACSL5 | rs11195911 | 0.1958939 | 0.796967433 | 0.4273633 | 0.93 (0.84 - 1.04) | |  |  |
| cg20707765 | ACSL5 | rs10509962 | 0.1782546 | 0.778412703 | 0.4730387 | 1.04 (0.98 - 1.11) | |  |  |
| cg18733757 | ACSL5 | rs7917309 | 0.6583127 | 0.948317069 | 0.03817001 | 0.99 (0.96 - 1.02) | |  |  |
| cg25780389 | ACSL5 | rs71483147 | 0.7686897 | 0.967537324 | 0.08949076 | 0.99 (0.91 - 1.07) | |  |  |
| cg16066219 | ACSL5 | rs11195916 | 0.822798 | 0.978213619 | 0.1954276 | 1 (0.95 - 1.04) | |  |  |
| cg02402091 | ACSL5 | rs7917309 | 0.6583254 | 0.948317069 | 0.09889255 | 0.99 (0.96 - 1.03) | |  |  |
| cg14991821 | ACSL5 | rs7917309 | 0.6591369 | 0.948466104 | 0.5394968 | 0.98 (0.87 - 1.09) | |  |  |
| cg13848598 | ADRB1 | rs11196600 | 0.9172712 | 0.992236069 | 0.3003366 | 1 (0.94 - 1.07) | |  |  |
| cg05575054 | ADRB1 | rs2782981 | 0.6403304 | 0.94546956 | 0.6539976 | 1.03 (0.92 - 1.15) | |  |  |
| cg17028652 | ADRB1 | rs11196599 | 0.9172487 | 0.992236069 | 0.3937585 | 1 (0.97 - 1.04) | |  |  |
| cg08580014 | PNLIPRP2 | rs10885990 | 0.7669245 | 0.967493586 | 0.258201 | 1.01 (0.97 - 1.04) | |  |  |
| cg12486169 | PNLIPRP2 | rs76598224 | 0.9538412 | 0.996245208 | 0.1912858 | 1 (0.96 - 1.04) | |  |  |
| cg17453460 | PNLIPRP2 | rs3816355 | 0.7732723 | 0.968671219 | 0.3698146 | 0.98 (0.88 - 1.1) | |  |  |
| cg11310496 | PNLIPRP2 | rs12415178 | 0.9980019 | 0.99964059 | 0.5786292 | 1 (0.9 - 1.11) |  |  |  |
| cg07093456 | PNLIPRP2 | rs12415178 | 0.9980019 | 0.99964059 | 0.3311483 | 1 (0.95 - 1.05) | |  |  |
| cg15988569 | PNLIPRP2 | rs12415178 | 0.9980019 | 0.99964059 | 0.3144553 | 1 (0.98 - 1.02) | |  |  |
| cg01047476 | PNLIPRP2 | rs12415178 | 0.9980019 | 0.99964059 | 0.3884334 | 1 (0.96 - 1.05) | |  |  |
| cg24689026 | PNLIPRP2 | rs9787662 | 0.9539791 | 0.996245208 | 0.3937663 | 1 (0.93 - 1.08) | |  |  |
| cg18699744 | PNLIPRP2 | rs12415178 | 0.9980019 | 0.99964059 | 0.3085167 | 1 (0.94 - 1.07) | |  |  |
| cg01175142 | PNLIPRP2 | rs12415178 | 0.9980019 | 0.99964059 | 0.2435921 | 1 (0.94 - 1.06) | |  |  |
| cg00098286 | PNLIPRP2 | rs2301179 | 0.6977294 | 0.957416217 | 0.3457162 | 1.02 (0.93 - 1.11) | |  |  |
| cg11788307 | INPP5F | rs193163999 | 0.1915178 | 0.792046995 | 0.4545743 | 0.94 (0.85 - 1.03) | |  |  |
| cg10149021 | INPP5F | rs1265535 | 0.1060107 | 0.709361424 | 0.1322951 | 0.95 (0.89 - 1.01) | |  |  |
| cg18425877 | INPP5F | rs196210 | 0.1250088 | 0.730338505 | 0.1432462 | 0.93 (0.86 - 1.02) | |  |  |
| cg27613076 | INPP5F | rs196210 | 0.1308222 | 0.735151407 | 0.1562123 | 0.91 (0.8 - 1.03) | |  |  |
| cg19978242 | INPP5F | rs6585564 | 0.6104935 | 0.940558433 | 0.04633806 | 0.97 (0.87 - 1.09) | |  |  |
| cg10280347 | PPAPDC1A | rs2463147 | 0.8352543 | 0.98064716 | 0.7890545 | 0.99 (0.88 - 1.11) | |  |  |
| cg02943604 | PPAPDC1A | rs1571103 | 0.9919266 | 0.998555028 | 0.4564722 | 1 (0.95 - 1.05) | |  |  |
| cg09271157 | PPAPDC1A | rs1571103 | 0.9919266 | 0.998555028 | 0.515419 | 1 (0.95 - 1.06) | |  |  |
| cg07413656 | PPAPDC1A | rs1571103 | 0.9919266 | 0.998555028 | 0.752057 | 1 (0.98 - 1.02) | |  |  |
| cg15929135 | PPAPDC1A | rs78619708 | 0.1598434 | 0.763370757 | 0.3759413 | 0.99 (0.97 - 1.01) | |  |  |
| cg10954330 | PPAPDC1A | rs1326665 | 0.988324 | 0.998215646 | 0.2156007 | 1 (0.98 - 1.02) | |  |  |
| cg19256589 | PPAPDC1A | rs10886730 | 0.3941409 | 0.886724183 | 0.3270119 | 1.03 (0.96 - 1.11) | |  |  |
| cg07766875 | PLEKHA1 | rs10736312 | 0.1240434 | 0.729292871 | 0.9037868 | 0.94 (0.88 - 1.02) | |  |  |
| cg01246254 | PLEKHA1 | rs149072744 | 0.2540531 | 0.834521616 | 0.272397 | 1.04 (0.97 - 1.11) | |  |  |
| cg19863426 | PLEKHA1 | rs4751889 | 0.5739209 | 0.932092124 | 0.7551202 | 1.02 (0.96 - 1.09) | |  |  |
| cg22262889 | ACADSB | rs12220683 | 0.8964975 | 0.990106178 | 0.7534652 | 1 (0.95 - 1.04) | |  |  |
| cg01208243 | ACADSB | rs12263012 | 0.4644657 | 0.905395414 | 0.940081 | 1.01 (0.98 - 1.05) | |  |  |
| cg18474502 | ACADSB | rs41291346 | 0.4234667 | 0.894226293 | 0.9108891 | 0.95 (0.84 - 1.08) | |  |  |
| cg01011367 | ACADSB | rs80195056 | 0.9591985 | 0.996245208 | 0.213462 | 1 (0.98 - 1.02) | |  |  |
| cg04323925 | PPP2R2D | rs9419217 | 0.9918827 | 0.998555028 | 0.7316653 | 1 (0.89 - 1.13) | |  |  |
| cg24885631 | PPP2R2D | rs7079591 | 0.3461471 | 0.870727742 | 0.9427115 | 0.96 (0.89 - 1.04) | |  |  |
| cg03958058 | PPP2R2D | rs7077135 | 0.3114222 | 0.85912998 | 0.9129013 | 1.01 (0.99 - 1.03) | |  |  |
| cg01118730 | PPP2R2D | rs10870270 | 0.8799671 | 0.986942168 | 0.8392267 | 1.01 (0.91 - 1.11) | |  |  |
| cg15102070 | PPP2R2D | rs113590591 | 0.9101184 | 0.991445541 | 0.908145 | 1.01 (0.91 - 1.11) | |  |  |
| cg07048479 | INPP5A | rs2767436 | 0.9910037 | 0.998338422 | 0.3172429 | 1 (0.92 - 1.08) | |  |  |
| cg25966016 | INPP5A | rs7912273 | 0.894518 | 0.989686692 | 0.7799744 | 0.99 (0.9 - 1.1) | |  |  |
| cg26193427 | INPP5A | rs75327631 | 0.9026544 | 0.990758602 | 0.6986251 | 1 (0.94 - 1.05) | |  |  |
| cg12507869 | INPP5A | rs7912273 | 0.8945082 | 0.989686692 | 0.8758256 | 0.99 (0.92 - 1.07) | |  |  |
| cg00862314 | INPP5A | rs79919904 | 0.1839258 | 0.784946519 | 0.04251438 | 1.02 (0.99 - 1.06) | |  |  |
| cg09421083 | INPP5A | rs12762637 | 0.1225666 | 0.727745022 | 0.5422691 | 0.96 (0.92 - 1.01) | |  |  |
| cg05714496 | INPP5A | rs34460796 | 0.5524613 | 0.926989479 | 0.5190521 | 0.99 (0.95 - 1.03) | |  |  |
| cg23714705 | INPP5A | rs7912316 | 0.8483029 | 0.98317263 | 0.8231469 | 0.99 (0.88 - 1.11) | |  |  |
| cg03735043 | INPP5A | rs73395333 | 0.1397792 | 0.74286336 | 0.0720887 | 1.03 (0.99 - 1.07) | |  |  |
| cg10967866 | INPP5A | rs75523587 | 0.4953019 | 0.913975899 | 0.9632081 | 1.03 (0.94 - 1.14) | |  |  |
| cg19137806 | INPP5A | rs75523587 | 0.4957674 | 0.914192976 | 0.8639551 | 1.04 (0.93 - 1.15) | |  |  |
| cg26426564 | INPP5A | rs7071571 | 0.9052081 | 0.990828994 | 0.4842715 | 1 (0.93 - 1.06) | |  |  |
| cg03207667 | INPP5A | rs12355773 | 0.4837108 | 0.910144138 | 0.2657126 | 1.02 (0.97 - 1.07) | |  |  |
| cg08195412 | INPP5A | rs75184896 | 0.7377016 | 0.964496589 | 0.9029319 | 1.02 (0.92 - 1.13) | |  |  |
| cg09415366 | INPP5A | rs2786900 | 0.8762325 | 0.986942168 | 0.1959124 | 1 (0.97 - 1.03) | |  |  |
| cg23023970 | INPP5A | rs2786900 | 0.8762333 | 0.986942168 | 0.2265723 | 1 (0.97 - 1.03) | |  |  |
| cg01189604 | INPP5A | rs10430616 | 0.9884565 | 0.998215646 | 0.2304321 | 1 (0.92 - 1.09) | |  |  |
| cg25394505 | INPP5A | rs149345061 | 0.1263472 | 0.731173695 | 0.0868319 | 1.16 (0.96 - 1.39) | |  |  |
| cg06760238 | INPP5A | rs149345061 | 0.133547 | 0.737382226 | 0.1734077 | 1.23 (0.94 - 1.6) | |  |  |
| cg16544463 | INPP5A | rs2814449 | 0.7886104 | 0.972251328 | 0.3205572 | 1 (0.97 - 1.02) | |  |  |
| cg27555617 | INPP5A | rs2492768 | 0.7388876 | 0.964522071 | 0.04609305 | 0.99 (0.97 - 1.03) | |  |  |
| cg12501287 | INPP5A | rs2814449 | 0.7886034 | 0.972251328 | 0.0922595 | 1 (0.98 - 1.01) | |  |  |
| cg25648286 | INPP5A | rs77874356 | 0.4058748 | 0.88912888 | 0.2974842 | 1.04 (0.95 - 1.14) | |  |  |
| cg03260643 | INPP5A | rs117912559 | 0.2861419 | 0.851128133 | 0.5210349 | 0.88 (0.71 - 1.11) | |  |  |
| cg25067606 | INPP5A | rs111705260 | 0.2041628 | 0.801739423 | 0.1009594 | 0.94 (0.86 - 1.03) | |  |  |
| cg05168453 | INPP5A | rs111705260 | 0.2032098 | 0.800821985 | 0.1106135 | 0.96 (0.91 - 1.02) | |  |  |
| cg19602187 | INPP5A | rs111705260 | 0.2028643 | 0.800647359 | 0.09586566 | 0.97 (0.92 - 1.02) | |  |  |
| cg09843855 | INPP5A | rs111705260 | 0.2030242 | 0.800778695 | 0.1075686 | 0.97 (0.92 - 1.02) | |  |  |
| cg10191248 | INPP5A | rs78839138 | 0.2848684 | 0.85112628 | 0.1291378 | 0.98 (0.94 - 1.02) | |  |  |
| cg03149567 | INPP5A | rs111705260 | 0.2030006 | 0.800778695 | 0.1077375 | 0.97 (0.92 - 1.02) | |  |  |
| cg02474563 | INPP5A | rs4880267 | 0.774115 | 0.968974613 | 0.5636084 | 1.01 (0.93 - 1.1) | |  |  |
| cg15583029 | INPP5A | rs10735667 | 0.9485208 | 0.995892549 | 0.816922 | 1 (0.97 - 1.03) | |  |  |
| cg09344098 | INPP5A | rs36092496 | 0.4856829 | 0.910747753 | 0.2674645 | 0.94 (0.81 - 1.11) | |  |  |
| cg08277036 | INPP5A | rs118038540 | 0.1326987 | 0.736839398 |  | 0.85 (0.69 - 1.05) | |  |  |
| cg04570208 | INPP5A | rs75597625 | 0.4453567 | 0.900764833 | 0.1325371 | 0.99 (0.95 - 1.02) | |  |  |
| cg09731745 | INPP5A | rs111705260 | 0.211076 | 0.80809579 | 0.05319567 | 0.88 (0.71 - 1.08) | |  |  |
| cg10683576 | INPP5A | rs4511214 | 0.1285644 | 0.733605169 | 0.5490961 | 0.92 (0.82 - 1.03) | |  |  |
| cg15908580 | INPP5A | rs12767762 | 0.1141788 | 0.717594215 | 0.2475786 | 0.93 (0.84 - 1.02) | |  |  |
| cg13441142 | INPP5A | rs12414233 | 0.2290865 | 0.820362054 | 0.4488187 | 1.05 (0.97 - 1.13) | |  |  |
| cg02541125 | INPP5A | rs2767426 | 0.7786679 | 0.97006492 | 0.6892674 | 1.01 (0.96 - 1.05) | |  |  |
| cg10924085 | INPP5A | rs873946 | 0.750633 | 0.96647031 | 0.3492097 | 0.99 (0.93 - 1.05) | |  |  |
| cg24905316 | ECHS1 | rs4838722 | 0.2780078 | 0.847776505 | 0.9192376 | 0.97 (0.93 - 1.02) | |  |  |
| cg09915092 | ECHS1 | rs4838721 | 0.282653 | 0.849749928 | 0.3409363 | 1.05 (0.96 - 1.16) | |  |  |
| cg15883382 | CYP2E1 | rs2254791 | 0.001674076 | 0.249187776 | 0.003467262 | 0.88 (0.82 - 0.95) | |  |  |
| cg00281977 | CYP2E1 | rs2254791 | 0.001366731 | 0.233321932 | 0.005716104 | 0.93 (0.89 - 0.97) | |  |  |
| cg09436743 | CYP2E1 | rs2254791 | 0.001659175 | 0.249187776 | 0.002277738 | 0.88 (0.82 - 0.95) | |  |  |
| cg08390786 | CYP2E1 | rs2254791 | 0.001650802 | 0.249187776 | 0.000773912 | 0.89 (0.82 - 0.96) | |  |  |
| cg24721873 | CYP2E1 | rs2254791 | 0.001451955 | 0.242127084 | 0.00363917 | 0.92 (0.87 - 0.97) | |  |  |
| cg01465364 | CYP2E1 | rs12253520 | 0.6432956 | 0.94603711 | 0.8983714 | 0.98 (0.88 - 1.08) | |  |  |
| cg19571004 | CYP2E1 | rs12253520 | 0.6431002 | 0.94603711 | 0.7486451 | 0.98 (0.89 - 1.08) | |  |  |
| cg10862468 | CYP2E1 | rs10857768 | 0.2508796 | 0.833179862 | 0.01055149 | 1.07 (0.96 - 1.19) | |  |  |
| cg23400446 | CYP2E1 | rs10857768 | 0.2497598 | 0.832474254 | 0.002864118 | 1.06 (0.96 - 1.17) | |  |  |
| cg24530264 | CYP2E1 | rs10857768 | 0.2512303 | 0.833240902 | 0.00376723 | 1.07 (0.95 - 1.19) | |  |  |
| cg18984983 | CYP2E1 | rs2254791 | 0.003282247 | 0.300276973 | 0.001231941 | 0.8 (0.68 - 0.93) | |  |  |
| cg05194426 | CYP2E1 | rs2254791 | 0.002622879 | 0.280519166 | 0.00065534 | 0.82 (0.72 - 0.93) | |  |  |
| cg11445109 | CYP2E1 | rs2254791 | 0.002594216 | 0.280519166 | 0.001432458 | 0.82 (0.73 - 0.93) | |  |  |
| cg06132940 | PTDSS2 | rs7114673 | 0.1183226 | 0.721588247 | 0.2906358 | 1.05 (0.99 - 1.11) | |  |  |
| cg13583586 | PTDSS2 | rs117262763 | 0.4076548 | 0.88970835 | 0.7744611 | 1.01 (0.98 - 1.05) | |  |  |
| cg22993527 | PTDSS2 | rs142869906 | 0.1106483 | 0.713163853 | 0.2917732 | 1.05 (0.99 - 1.12) | |  |  |
| cg10419178 | PTDSS2 | rs6598020 | 0.1305857 | 0.735151407 | 0.5056079 | 0.96 (0.9 - 1.01) | |  |  |
| cg06143971 | HRAS | rs72851191 | 0.170694 | 0.7727445 | 0.001215515 | 1.05 (0.98 - 1.12) | |  |  |
| cg12989344 | HRAS | rs12628 | 0.2089307 | 0.806013578 | 0.2922528 | 1.05 (0.97 - 1.13) | |  |  |
| cg08141873 | HRAS | rs12785860 | 0.192612 | 0.793952388 | 0.5363512 | 1.04 (0.98 - 1.1) | |  |  |
| cg03188793 | TALDO1 | rs3895063 | 0.5462662 | 0.925718604 | 0.2713408 | 0.99 (0.98 - 1.01) | |  |  |
| cg19502266 | PNPLA2 | rs6597978 | 0.5800505 | 0.933477851 | 0.8962929 | 1.02 (0.96 - 1.08) | |  |  |
| cg11054774 | PNPLA2 | rs7925131 | 0.375742 | 0.880043378 | 0.7366687 | 1.02 (0.98 - 1.05) | |  |  |
| cg00613255 | INS | rs3842727 | 0.0337107 | 0.575913697 | 0.03852714 | 0.93 (0.87 - 0.99) | |  |  |
| cg21574853 | INS | rs3842753 | 0.007320183 | 0.399264671 | 0.01762153 | 0.94 (0.91 - 0.98) | |  |  |
| cg25336198 | INS | rs3842753 | 0.007496783 | 0.402778931 | 0.0103202 | 0.94 (0.89 - 0.98) | |  |  |
| cg03366382 | INS | rs689 | 0.00592648 | 0.363653255 | 0.007749829 | 0.95 (0.91 - 0.99) | |  |  |
| cg24338752 | INS | rs3842753 | 0.007268259 | 0.398991675 | 0.01893161 | 0.95 (0.91 - 0.98) | |  |  |
| cg11322849 | INS | rs11602347 | 0.4614117 | 0.904743358 | 0.1563937 | 1.03 (0.96 - 1.1) | |  |  |
| cg11208229 | INS | rs11602347 | 0.4626727 | 0.905162309 | 0.09254848 | 1.04 (0.94 - 1.14) | |  |  |
| cg25601886 | INS | rs3842755 | 0.2464943 | 0.830530612 | 0.06783119 | 0.95 (0.87 - 1.04) | |  |  |
| cg23390871 | INS | rs689 | 0.01011036 | 0.446305612 | 0.00450417 | 1.17 (1.04 - 1.31) | |  |  |
| cg25232888 | OSBPL5 | rs8813 | 0.9637254 | 0.996277787 | 0.2266008 | 1 (0.98 - 1.02) | |  |  |
| cg04831048 | OSBPL5 | rs4297442 | 0.4515854 | 0.902173641 | 0.7640394 | 1.03 (0.95 - 1.12) | |  |  |
| cg09414264 | OSBPL5 | rs4758473 | 0.5706588 | 0.931651393 | 0.8573549 | 1.02 (0.96 - 1.08) | |  |  |
| cg24759599 | OSBPL5 | rs4297442 | 0.4507858 | 0.902173641 | 0.8388797 | 1.03 (0.96 - 1.09) | |  |  |
| cg06433350 | OSBPL5 | rs4520579 | 0.4510481 | 0.902173641 | 0.8371709 | 1.04 (0.94 - 1.16) | |  |  |
| cg09821493 | OSBPL5 | rs17263839 | 0.8184758 | 0.977632792 | 0.07400165 | 1.01 (0.93 - 1.09) | |  |  |
| cg04672275 | OSBPL5 | rs1530583 | 0.760615 | 0.966906249 | 0.8964795 | 1.01 (0.96 - 1.06) | |  |  |
| cg09729924 | OSBPL5 | rs11601774 | 0.5301468 | 0.921796979 | 0.8734527 | 0.97 (0.87 - 1.08) | |  |  |
| cg24760414 | OSBPL5 | rs11025599 | 0.6355881 | 0.94473796 | 0.8805709 | 0.99 (0.97 - 1.02) | |  |  |
| cg25963939 | OSBPL5 | rs7110912 | 0.2101969 | 0.807633079 | 0.577379 | 1.01 (0.99 - 1.04) | |  |  |
| cg14991004 | OSBPL5 | rs11025610 | 0.7735343 | 0.968776685 | 0.7870651 | 0.99 (0.92 - 1.06) | |  |  |
| cg25908390 | OSBPL5 | rs1009638 | 0.8872057 | 0.987692914 | 0.6045405 | 0.99 (0.88 - 1.12) | |  |  |
| cg06120313 | OSBPL5 | rs79968040 | 0.5590804 | 0.929599097 | 0.86144 | 0.99 (0.97 - 1.02) | |  |  |
| cg26073542 | OSBPL5 | rs4758540 | 0.7622418 | 0.966957226 | 0.4499593 | 1.01 (0.94 - 1.08) | |  |  |
| cg00500359 | OSBPL5 | rs111247453 | 0.1357428 | 0.738367842 | 0.4236006 | 1.21 (0.94 - 1.56) | |  |  |
| cg15964132 | OSBPL5 | rs111247453 | 0.1389108 | 0.741681943 | 0.411085 | 1.24 (0.93 - 1.66) | |  |  |
| cg06005892 | OSBPL5 | rs4262708 | 0.4476331 | 0.90142184 | 0.7312679 | 1.04 (0.94 - 1.14) | |  |  |
| cg25627263 | OSBPL5 | rs4262708 | 0.4455271 | 0.900785949 | 0.7662307 | 1.01 (0.98 - 1.05) | |  |  |
| cg18415791 | OSBPL5 | rs34820287 | 0.5592395 | 0.929682891 | 0.768041 | 1.03 (0.94 - 1.12) | |  |  |
| cg10803034 | OSBPL5 | rs4758541 | 0.7618666 | 0.966957226 | 0.8773372 | 1.01 (0.97 - 1.05) | |  |  |
| cg20511548 | OSBPL5 | rs4262708 | 0.4453181 | 0.900745906 | 0.6698416 | 1.01 (0.98 - 1.04) | |  |  |
| cg14488317 | OSBPL5 | rs4237786 | 0.805115 | 0.9750543 | 0.9214472 | 1.02 (0.9 - 1.15) | |  |  |
| cg13634736 | OSBPL5 | rs148727724 | 0.1454166 | 0.749837636 | 0.0362258 | 0.9 (0.78 - 1.04) | |  |  |
| cg22074576 | OSBPL5 | rs111247453 | 0.1287573 | 0.733721321 | 0.2006159 | 0.89 (0.77 - 1.03) | |  |  |
| cg11678461 | OSBPL5 | rs111247453 | 0.129579 | 0.734159084 | 0.1754827 | 0.88 (0.75 - 1.04) | |  |  |
| cg23357130 | OSBPL5 | rs111247453 | 0.1298085 | 0.734159084 | 0.1985611 | 0.88 (0.74 - 1.04) | |  |  |
| cg16129132 | OSBPL5 | rs4370914 | 0.4372335 | 0.898324149 | 0.6702791 | 1.02 (0.97 - 1.08) | |  |  |
| cg12851049 | OSBPL5 | rs4262708 | 0.4456829 | 0.900841039 | 0.7579076 | 1.02 (0.97 - 1.06) | |  |  |
| cg08486397 | OSBPL5 | rs4758471 | 0.5143923 | 0.917045547 | 0.7932009 | 1.03 (0.94 - 1.14) | |  |  |
| cg20345446 | OSBPL5 | rs4758471 | 0.5133132 | 0.917043007 | 0.9043172 | 1.02 (0.96 - 1.08) | |  |  |
| cg07284339 | OSBPL5 | rs4758471 | 0.5130188 | 0.91691468 | 0.8918223 | 1.02 (0.97 - 1.06) | |  |  |
| cg04092393 | OSBPL5 | rs1009638 | 0.8872008 | 0.987692914 | 0.4868534 | 0.99 (0.89 - 1.1) | |  |  |
| cg24226590 | OSBPL5 | rs7942908 | 0.64188 | 0.945611353 | 0.9022514 | 1.01 (0.95 - 1.08) | |  |  |
| cg00488501 | OSBPL5 | rs895556 | 0.7426137 | 0.965455341 | 0.874257 | 1.01 (0.94 - 1.09) | |  |  |
| cg12245912 | OSBPL5 | rs4758550 | 0.4577497 | 0.903711216 | 0.6954837 | 1.03 (0.96 - 1.1) | |  |  |
| cg12491594 | OSBPL5 | rs1009638 | 0.8871893 | 0.987692914 | 0.3696227 | 0.99 (0.92 - 1.08) | |  |  |
| cg22353828 | OSBPL5 | rs1867908 | 0.660898 | 0.949240194 | 0.1840081 | 1.02 (0.94 - 1.1) | |  |  |
| cg08124000 | OSBPL5 | rs72848215 | 0.5640385 | 0.930212284 | 0.6317228 | 1.02 (0.96 - 1.07) | |  |  |
| cg03361664 | OSBPL5 | rs72848215 | 0.5640737 | 0.930212284 | 0.3235838 | 1.02 (0.96 - 1.07) | |  |  |
| cg03857384 | OSBPL5 | rs1867908 | 0.6606661 | 0.949198952 | 0.2481759 | 1.01 (0.96 - 1.07) | |  |  |
| cg15718663 | OSBPL5 | rs11025731 | 0.5827425 | 0.934284459 | 0.4679794 | 1.02 (0.94 - 1.12) | |  |  |
| cg18897335 | OSBPL5 | rs1867908 | 0.6606492 | 0.949196842 | 0.4548794 | 1.01 (0.96 - 1.06) | |  |  |
| cg22766888 | OSBPL5 | rs4758548 | 0.2273198 | 0.818961922 | 0.3420081 | 0.99 (0.97 - 1.01) | |  |  |
| cg15337538 | SMPD1 | rs73398846 | 0.3281943 | 0.864357645 | 0.864603 | 0.96 (0.87 - 1.05) | |  |  |
| cg24682012 | SMPD1 | rs1800606 | 0.2815866 | 0.849255691 | 0.798224 | 0.97 (0.91 - 1.03) | |  |  |
| cg09621031 | CYB5R2 | rs72851388 | 0.1662827 | 0.768682057 | 0.9140196 | 0.97 (0.93 - 1.01) | |  |  |
| cg15290965 | CYB5R2 | rs7126061 | 0.2139972 | 0.810397797 | 0.2721952 | 1.07 (0.96 - 1.2) | |  |  |
| cg15228694 | CYB5R2 | rs12801394 | 0.8285322 | 0.979371732 | 0.1147627 | 1 (0.96 - 1.05) | |  |  |
| cg06876053 | SBF2 | rs2645029 | 0.982587 | 0.99749749 | 0.5815919 | 1 (0.91 - 1.1) |  |  |  |
| cg01053763 | SBF2 | rs187901392 | 0.9203642 | 0.992685898 | 0.4546717 | 1.01 (0.83 - 1.23) | |  |  |
| cg23875677 | SBF2 | rs10500721 | 0.09015257 | 0.695768827 | 0.4673657 | 1.04 (0.99 - 1.1) | |  |  |
| cg24900563 | SBF2 | rs61889847 | 0.3212036 | 0.862134112 | 0.114935 | 1.01 (0.99 - 1.04) | |  |  |
| cg16931664 | CSNK2A1 | rs10840586 | 0.8279641 | 0.979282707 | 0.5377989 | 1 (0.96 - 1.03) | |  |  |
| cg13179472 | CSNK2A1 | rs1875775 | 0.6503733 | 0.946720059 | 0.8757604 | 1.02 (0.95 - 1.09) | |  |  |
| cg15618674 | CSNK2A1 | rs7113564 | 0.6240853 | 0.942975515 | 0.6977909 | 0.99 (0.95 - 1.03) | |  |  |
| cg01303055 | CSNK2A1 | rs4076941 | 0.4538857 | 0.902946589 | 0.9222033 | 0.96 (0.88 - 1.06) | |  |  |
| cg16827215 | CSNK2A1 | rs12282401 | 0.1830756 | 0.784279171 | 0.8047139 | 0.99 (0.97 - 1.01) | |  |  |
| cg06694040 | CSNK2A1 | rs16909324 | 0.2735766 | 0.845112649 | 0.4987349 | 0.97 (0.93 - 1.02) | |  |  |
| cg20438286 | CSNK2A1 | rs12578058 | 0.9934383 | 0.998800437 | 0.3744461 | 1 (0.93 - 1.08) | |  |  |
| cg18090970 | CSNK2A1 | rs1466608 | 0.9698184 | 0.997273118 | 0.9052225 | 1 (0.87 - 1.14) | |  |  |
| cg25560215 | CSNK2A1 | rs12283371 | 0.6843751 | 0.954559788 | 0.6194619 | 0.98 (0.88 - 1.09) | |  |  |
| cg26234233 | CSNK2A1 | rs78233145 | 0.2490436 | 0.832255902 | 0.9732697 | 1.01 (0.99 - 1.03) | |  |  |
| cg09068031 | CSNK2A1 | rs6484943 | 0.6531974 | 0.947348842 | 0.9794905 | 0.99 (0.97 - 1.02) | |  |  |
| cg15714103 | ARNTL | rs72867493 | 0.06881994 | 0.66072768 | 0.004737882 | 0.92 (0.84 - 1.01) | |  |  |
| cg04367197 | ARNTL | rs900144 | 0.2881853 | 0.851834806 | 0.04431093 | 1.03 (0.98 - 1.08) | |  |  |
| cg15603424 | ARNTL | rs7933521 | 0.7020531 | 0.958472935 | 0.3605229 | 1.01 (0.96 - 1.06) | |  |  |
| cg12537728 | ARNTL | rs72867447 | 0.2299291 | 0.82066468 | 0.07748594 | 0.95 (0.88 - 1.03) | |  |  |
| cg14794298 | ARNTL | rs34862781 | 0.2874294 | 0.851751843 | 0.05031911 | 0.95 (0.86 - 1.04) | |  |  |
| cg19098768 | FAR1 | rs72866521 | 0.5943908 | 0.935959061 | 0.3990541 | 0.98 (0.89 - 1.07) | |  |  |
| cg25251204 | CYP2R1 | rs1553006 | 0.9699789 | 0.997273118 | 0.8348982 | 1 (0.97 - 1.03) | |  |  |
| cg00085434 | CYP2R1 | rs1553006 | 0.9699789 | 0.997273118 | 0.8235728 | 1 (0.96 - 1.04) | |  |  |
| cg16394018 | CYP2R1 | rs1553006 | 0.969979 | 0.997273118 | 0.8043494 | 1 (0.94 - 1.06) | |  |  |
| cg21972837 | PIK3C2A | rs594034 | 0.3769526 | 0.880600815 | 0.002845815 | 1.02 (0.98 - 1.07) | |  |  |
| cg26906217 | PIK3C2A | rs10832752 | 0.2459323 | 0.830315778 | 0.00496164 | 0.95 (0.86 - 1.04) | |  |  |
| cg15729439 | LDHA | rs11024636 | 0.2810716 | 0.848934664 | 0.3144927 | 1.01 (0.99 - 1.04) | |  |  |
| cg09583302 | LDHA | rs3758683 | 0.3414542 | 0.869086016 | 0.1601271 | 0.99 (0.97 - 1.01) | |  |  |
| cg19631472 | LDHA | rs11024636 | 0.2823614 | 0.849749928 | 0.5056209 | 1.03 (0.98 - 1.08) | |  |  |
| cg15700009 | LDHA | rs10766473 | 0.3099003 | 0.858606854 | 0.3011432 | 1.03 (0.97 - 1.09) | |  |  |
| cg02232751 | LDHA | rs6486424 | 0.3425842 | 0.869689834 | 0.3776602 | 1.03 (0.97 - 1.1) | |  |  |
| cg07093428 | LDHC | rs4757650 | 0.7531436 | 0.966809685 | 0.5660458 | 1 (0.98 - 1.02) | |  |  |
| cg19767548 | LDHC | rs142676548 | 0.6329 | 0.944551386 | 0.763456 | 1 (0.99 - 1.02) | |  |  |
| cg14332815 | LDHC | rs11605386 | 0.6952084 | 0.957247838 | 0.6207839 | 1 (0.98 - 1.02) | |  |  |
| cg11821245 | LDHC | rs2658549 | 0.6333912 | 0.944551386 | 0.674481 | 1 (0.99 - 1.02) | |  |  |
| cg14259717 | LDHC | rs4757650 | 0.7531495 | 0.966809685 | 0.5697404 | 1 (0.98 - 1.03) | |  |  |
| cg08418111 | LDHC | rs11605386 | 0.6952219 | 0.957247838 | 0.4793111 | 1 (0.98 - 1.03) | |  |  |
| cg09332484 | LDHC | rs7938267 | 0.1333408 | 0.737181027 | 0.5431426 | 1.06 (0.98 - 1.15) | |  |  |
| cg05740244 | LDHC | rs4757650 | 0.7531428 | 0.966809685 | 0.5672936 | 1 (0.98 - 1.02) | |  |  |
| cg00567382 | LDHAL6A | rs112149204 | 0.7079755 | 0.959271339 | 0.7655559 | 0.99 (0.92 - 1.06) | |  |  |
| cg26740318 | LDHAL6A | rs2658548 | 0.1125019 | 0.714938212 | 0.4822605 | 1.04 (0.99 - 1.09) | |  |  |
| cg05655707 | LDHAL6A | rs2658548 | 0.1126299 | 0.715176912 | 0.4148048 | 1.04 (0.99 - 1.1) | |  |  |
| cg14813083 | LDHAL6A | rs2658548 | 0.1121616 | 0.714145648 | 0.4996242 | 1.04 (0.99 - 1.09) | |  |  |
| cg06588556 | LDHAL6A | rs2658548 | 0.111879 | 0.7137217 | 0.4687651 | 1.03 (0.99 - 1.08) | |  |  |
| cg06888460 | LDHAL6A | rs2658548 | 0.1120262 | 0.713890781 | 0.4718265 | 1.04 (0.99 - 1.08) | |  |  |
| cg18888461 | LDHAL6A | rs2658548 | 0.1122137 | 0.714309654 | 0.5189525 | 1.04 (0.99 - 1.09) | |  |  |
| cg15463284 | LDHAL6A | rs2658548 | 0.1120709 | 0.713955843 | 0.5617122 | 1.04 (0.99 - 1.08) | |  |  |
| cg07915343 | LDHAL6A | rs7938977 | 0.2710212 | 0.844564001 | 0.1745774 | 1.03 (0.97 - 1.09) | |  |  |
| cg23797887 | LDHAL6A | rs73436668 | 0.08432459 | 0.686545366 | 0.2562179 | 1.06 (0.99 - 1.12) | |  |  |
| cg04389533 | CAT | rs2073059 | 0.5451584 | 0.925385059 | 0.2592446 | 1.02 (0.96 - 1.09) | |  |  |
| cg04464122 | CAT | rs1001179 | 0.2412988 | 0.827734869 | 0.9842762 | 0.97 (0.93 - 1.02) | |  |  |
| cg20234170 | CAT | rs10836229 | 0.1814854 | 0.782555408 | 0.8797948 | 0.93 (0.84 - 1.03) | |  |  |
| cg22159421 | CAT | rs508370 | 0.2888641 | 0.852105405 | 0.973952 | 0.94 (0.83 - 1.06) | |  |  |
| cg07768201 | CAT | rs11604331 | 0.1531955 | 0.755901936 | 0.9861594 | 0.91 (0.81 - 1.03) | |  |  |
| cg02109652 | CAT | rs12793666 | 0.1488201 | 0.75215707 | 0.9453026 | 0.92 (0.83 - 1.03) | |  |  |
| cg06908474 | CAT | rs10836229 | 0.182784 | 0.783882993 | 0.9925088 | 0.93 (0.83 - 1.04) | |  |  |
| cg01847719 | CAT | rs11604331 | 0.1524185 | 0.755675857 | 0.9980306 | 0.92 (0.81 - 1.03) | |  |  |
| cg14316565 | CAT | rs35960263 | 0.3823368 | 0.88212931 | 0.9356018 | 0.95 (0.85 - 1.06) | |  |  |
| cg17034036 | CAT | rs61882280 | 0.7208711 | 0.961375457 | 0.8932197 | 0.98 (0.88 - 1.09) | |  |  |
| cg09106728 | CAT | rs10488736 | 0.7829299 | 0.971453214 | 0.8737308 | 1.01 (0.96 - 1.06) | |  |  |
| cg01703219 | HSD17B12 | rs11037556 | 0.4678076 | 0.906619502 | 0.2612512 | 1.01 (0.99 - 1.03) | |  |  |
| cg26296119 | CREB3L1 | rs7113478 | 0.3715527 | 0.878863285 | 0.7327913 | 0.97 (0.92 - 1.03) | |  |  |
| cg07307975 | CREB3L1 | rs11038827 | 0.1573947 | 0.760779903 | 0.6225228 | 0.96 (0.91 - 1.02) | |  |  |
| cg11323439 | CREB3L1 | rs28755875 | 0.3101958 | 0.858817327 | 0.7084573 | 1.07 (0.94 - 1.21) | |  |  |
| cg11485154 | CREB3L1 | rs7105744 | 0.3458546 | 0.870701739 | 0.8311193 | 1.04 (0.96 - 1.13) | |  |  |
| cg25963429 | CREB3L1 | rs34771037 | 0.2160952 | 0.811687258 | 0.1595232 | 0.92 (0.81 - 1.05) | |  |  |
| cg16012690 | CREB3L1 | rs186710537 | 0.3125845 | 0.85912998 | 0.8663193 | 1.1 (0.92 - 1.31) | |  |  |
| cg22902089 | CREB3L1 | rs72910027 | 0.392894 | 0.886570996 | 0.01010959 | 1.05 (0.93 - 1.19) | |  |  |
| cg03790378 | NR1H3 | rs151202997 | 0.6015253 | 0.937894714 | 0.8154597 | 1.01 (0.96 - 1.07) | |  |  |
| cg04959790 | NR1H3 | rs151202997 | 0.6010909 | 0.937894714 | 0.8999184 | 1.01 (0.98 - 1.03) | |  |  |
| cg12613344 | NR1H3 | rs61897360 | 0.6080942 | 0.939714371 | 0.5697447 | 1.02 (0.95 - 1.09) | |  |  |
| cg09548275 | NR1H3 | rs10838684 | 0.4261686 | 0.894464203 | 0.04764789 | 1.05 (0.94 - 1.17) | |  |  |
| cg12329048 | MED19 | rs3781885 | 0.1732812 | 0.774561748 | 0.912968 | 0.93 (0.84 - 1.03) | |  |  |
| cg14295955 | MED19 | rs77182786 | 0.1252787 | 0.730395132 | 0.8032852 | 0.91 (0.81 - 1.03) | |  |  |
| cg07689907 | FADS1 | rs174561 | 0.002318657 | 0.274228824 | 0.01820432 | 1.05 (1.02 - 1.08) | |  |  |
| cg24870774 | FADS2 | rs174559 | 0.09474368 | 0.70058811 | 0.02096273 | 1.11 (0.98 - 1.25) | |  |  |
| cg16213375 | FADS1 | rs174560 | 0.002427288 | 0.278381402 | 0.006788039 | 1.08 (1.03 - 1.14) | |  |  |
| cg10515671 | FADS1 | rs174533 | 0.007689888 | 0.405606087 | 0.000414654 | 0.89 (0.81 - 0.97) | |  |  |
| cg27386326 | FADS1 | rs61896141 | 0.2904838 | 0.85284072 | 0.00017597 | 1.03 (0.98 - 1.08) | |  |  |
| cg21709803 | FADS2 | rs968567 | 0.24481 | 0.829874618 | 4.49075E-05 | 0.98 (0.94 - 1.02) | |  |  |
| cg06781209 | FADS2 | rs968567 | 0.2446961 | 0.829874618 | 5.24385E-05 | 0.98 (0.94 - 1.02) | |  |  |
| cg07005513 | FADS2 | rs174559 | 0.08620084 | 0.688590067 | 0.01364413 | 1.07 (0.99 - 1.15) | |  |  |
| cg16576620 | FADS2 | rs174534 | 0.2127579 | 0.809536209 | 0.008870386 | 1.08 (0.96 - 1.22) | |  |  |
| cg19610905 | FADS2 | rs174566 | 0.004588483 | 0.329441106 | 0.01138944 | 1.04 (1.01 - 1.07) | |  |  |
| cg00603274 | FADS2 | rs61896141 | 0.290112 | 0.852807299 | 8.94191E-05 | 0.98 (0.94 - 1.02) | |  |  |
| cg14911132 | FADS2 | rs968567 | 0.2457184 | 0.830315778 | 0.000123441 | 0.96 (0.91 - 1.03) | |  |  |
| cg01400685 | FADS2 | rs61897793 | 0.2299027 | 0.82066468 | 4.99972E-05 | 0.98 (0.94 - 1.02) | |  |  |
| cg25324164 | FADS2 | rs968567 | 0.24513 | 0.830019795 | 3.08104E-05 | 0.97 (0.92 - 1.02) | |  |  |
| cg11250194 | FADS2 | rs174559 | 0.08165037 | 0.680200216 | 0.006245727 | 1.03 (1 - 1.06) | |  |  |
| cg10972932 | HRASLS5 | rs12272646 | 0.9153004 | 0.992198732 | 0.5498614 | 1 (0.91 - 1.09) | |  |  |
| cg19570321 | HRASLS5 | rs116362768 | 0.2168948 | 0.812443751 | 0.1429882 | 1.17 (0.91 - 1.5) | |  |  |
| cg22380508 | PLA2G16 | rs11600655 | 0.1329873 | 0.737035493 | 0.2906382 | 0.97 (0.94 - 1.01) | |  |  |
| cg03627015 | PLA2G16 | rs10897438 | 0.2594425 | 0.837043429 | 0.2486969 | 1.06 (0.96 - 1.17) | |  |  |
| cg26204322 | PLCB3 | rs34358026 | 0.5941796 | 0.935860936 | 0.3397146 | 0.99 (0.96 - 1.03) | |  |  |
| cg17155859 | PLCB3 | rs599908 | 0.7587168 | 0.966870715 | 0.1450133 | 0.98 (0.87 - 1.1) | |  |  |
| cg19006947 | PLCB3 | rs28395877 | 0.09446257 | 0.70058811 | 0.9801015 | 1.02 (1 - 1.04) | |  |  |
| cg18375707 | PLCB3 | rs28395877 | 0.09482891 | 0.70058811 | 0.8922139 | 1.02 (1 - 1.05) | |  |  |
| cg27651452 | PLCB3 | rs11231735 | 0.09941783 | 0.704300744 | 0.9053584 | 1.05 (0.99 - 1.12) | |  |  |
| cg03527086 | ESRRA | rs61761262 | 0.5025163 | 0.916095255 | 0.7845068 | 0.96 (0.87 - 1.07) | |  |  |
| cg18006808 | PPP2R5B | rs584715 | 0.5360345 | 0.922827354 | 0.7784715 | 1.03 (0.94 - 1.12) | |  |  |
| cg24276070 | PPP2R5B | rs1152645 | 0.4136482 | 0.891192945 | 0.9255369 | 1.04 (0.94 - 1.16) | |  |  |
| cg17500632 | PPP2R5B | rs67557026 | 0.8210877 | 0.978122306 | 0.7904033 | 1 (0.96 - 1.03) | |  |  |
| cg09175289 | TM7SF2 | rs72932837 | 0.5392827 | 0.923264914 | 0.78954 | 0.97 (0.9 - 1.06) | |  |  |
| cg23991055 | TM7SF2 | rs113662039 | 0.7448207 | 0.965761902 | 0.5809546 | 1.01 (0.95 - 1.07) | |  |  |
| cg07471203 | TM7SF2 | rs112671673 | 0.6829829 | 0.954134149 | 0.8777473 | 1.01 (0.98 - 1.03) | |  |  |
| cg06467504 | PC | rs117303800 | 0.07342616 | 0.668734227 | 0.1749678 | 1.02 (1 - 1.04) | |  |  |
| cg11525980 | PC | rs896438 | 0.758483 | 0.966870715 | 0.5693062 | 1.01 (0.97 - 1.04) | |  |  |
| cg03626668 | PC | rs146093696 | 0.5084155 | 0.91691468 | 0.8981618 | 0.99 (0.94 - 1.03) | |  |  |
| cg12939085 | PPP1CA | rs2286620 | 0.3944887 | 0.886733456 | 0.3860583 | 0.97 (0.91 - 1.04) | |  |  |
| cg17661940 | PPP1CA | rs646834 | 0.6380743 | 0.945199463 | 0.3985766 | 0.97 (0.87 - 1.09) | |  |  |
| cg17086579 | PITPNM1 | rs148717412 | 0.9310415 | 0.993733866 | 0.6055914 | 1 (0.95 - 1.04) | |  |  |
| cg11468085 | ALDH3B2 | rs4520603 | 0.6731405 | 0.9518494 | 0.1536896 | 1.02 (0.92 - 1.14) | |  |  |
| cg07891457 | ALDH3B2 | rs4930477 | 0.7630367 | 0.967128265 | 0.9796945 | 1.03 (0.86 - 1.22) | |  |  |
| cg14353201 | ALDH3B2 | rs187834577 | 0.2144534 | 0.810794963 | 0.5169679 | 0.97 (0.93 - 1.02) | |  |  |
| cg09982224 | ALDH3B1 | rs3764818 | 0.8295282 | 0.979553415 | 0.06405503 | 1 (0.96 - 1.03) | |  |  |
| cg01577760 | ALDH3B1 | rs3764818 | 0.8295173 | 0.979553415 | 0.05274088 | 1 (0.98 - 1.02) | |  |  |
| cg18229767 | ALDH3B1 | rs2286170 | 0.9972447 | 0.999614083 | 0.1331032 | 1 (0.93 - 1.08) | |  |  |
| cg00414166 | ALDH3B1 | rs475325 | 0.7247747 | 0.962096476 | 0.1172101 | 1.02 (0.93 - 1.11) | |  |  |
| cg15322932 | ALDH3B1 | rs475325 | 0.7249793 | 0.962182234 | 0.2540091 | 1.02 (0.91 - 1.14) | |  |  |
| cg26833538 | ALDH3B1 | rs475325 | 0.7247978 | 0.962096476 | 0.157304 | 1.02 (0.93 - 1.11) | |  |  |
| cg24390938 | ALDH3B1 | rs475325 | 0.7247555 | 0.962096476 | 0.1338065 | 1.02 (0.93 - 1.11) | |  |  |
| cg23121335 | ALDH3B1 | rs572574 | 0.07506307 | 0.671412212 | 0.6819711 | 0.92 (0.84 - 1.01) | |  |  |
| cg18412889 | ALDH3B1 | rs3764818 | 0.8296155 | 0.979553415 | 0.1365068 | 1.01 (0.92 - 1.11) | |  |  |
| cg05989862 | CHKA | rs10791959 | 0.1473105 | 0.75097511 | 0.6346955 | 1.07 (0.98 - 1.18) | |  |  |
| cg22911054 | CPT1A | rs11228377 | 0.06332377 | 0.649580569 | 0.4153088 | 1.05 (1 - 1.11) | |  |  |
| cg24488311 | CPT1A | rs629426 | 0.05599355 | 0.637929543 | 0.32146 | 0.93 (0.87 - 1) | |  |  |
| cg01988459 | CPT1A | rs7930706 | 0.1511295 | 0.754436471 | 0.3581094 | 1.08 (0.97 - 1.19) | |  |  |
| cg18350739 | CPT1A | rs646586 | 0.1287187 | 0.733721321 | 0.1226944 | 1.06 (0.98 - 1.15) | |  |  |
| cg06550274 | DHCR7 | rs1790328 | 0.4424532 | 0.8997726 | 0.2206866 | 1.01 (0.98 - 1.04) | |  |  |
| cg10763288 | DHCR7 | rs12278461 | 0.2084907 | 0.805447296 | 0.5158548 | 1.05 (0.97 - 1.14) | |  |  |
| cg12267021 | LRTOMT | rs73531952 | 0.3600677 | 0.875247081 | 0.3841311 | 0.97 (0.91 - 1.03) | |  |  |
| cg19740763 | INPPL1 | rs72477721 | 0.2418124 | 0.828160144 | 0.4701062 | 0.98 (0.96 - 1.01) | |  |  |
| cg15008287 | STARD10 | rs663015 | 0.03920386 | 0.595003165 | 0.000576006 | 1.09 (1 - 1.19) | |  |  |
| cg10933774 | STARD10 | rs534668 | 0.03414564 | 0.577961446 | 0.00719106 | 1.06 (1 - 1.12) | |  |  |
| cg09114833 | NEU3 | rs4554917 | 0.8858077 | 0.987501595 | 0.07933148 | 0.99 (0.92 - 1.08) | |  |  |
| cg05064990 | GDPD5 | rs7107598 | 0.9661871 | 0.996697851 | 0.6794981 | 1 (0.92 - 1.09) | |  |  |
| cg21583440 | GDPD5 | rs56386896 | 0.9946172 | 0.998966109 | 0.8588991 | 1 (0.95 - 1.05) | |  |  |
| cg03630215 | GDPD5 | rs1793399 | 0.4909157 | 0.912787214 | 0.2051799 | 1.02 (0.96 - 1.1) | |  |  |
| cg15526825 | GDPD5 | rs12361128 | 0.861462 | 0.985444341 | 0.2726892 | 1 (0.95 - 1.05) | |  |  |
| cg22271905 | GDPD5 | rs11236448 | 0.860792 | 0.985444341 | 0.446283 | 1 (0.94 - 1.05) | |  |  |
| cg16393207 | GDPD5 | rs12361128 | 0.8614606 | 0.985444341 | 0.3187524 | 1 (0.95 - 1.04) | |  |  |
| cg26288892 | MOGAT2 | rs1219536 | 0.607598 | 0.939529791 | 0.4804355 | 0.99 (0.95 - 1.03) | |  |  |
| cg10585962 | MOGAT2 | rs10899102 | 0.6059696 | 0.938959305 | 0.3839775 | 0.99 (0.94 - 1.04) | |  |  |
| cg20938170 | MOGAT2 | rs1219466 | 0.7757978 | 0.969162717 | 0.6657765 | 0.99 (0.91 - 1.07) | |  |  |
| cg20983112 | DGAT2 | rs554202 | 0.7986468 | 0.974115185 | 0.6881964 | 0.99 (0.91 - 1.07) | |  |  |
| cg10550506 | ACER3 | rs1225148 | 0.3034539 | 0.857248999 | 0.1927978 | 1.05 (0.95 - 1.16) | |  |  |
| cg02208432 | ACER3 | rs11236999 | 0.170088 | 0.771407624 | 0.1983712 | 0.97 (0.93 - 1.01) | |  |  |
| cg08711063 | ACER3 | rs17135325 | 0.3640545 | 0.876571505 | 0.9414256 | 0.96 (0.89 - 1.04) | |  |  |
| cg02385173 | ACER3 | rs113153306 | 0.4043485 | 0.888627194 | 0.9050893 | 0.97 (0.91 - 1.04) | |  |  |
| cg17838626 | ACER3 | rs10899326 | 0.4069222 | 0.889367418 | 0.4133966 | 0.96 (0.86 - 1.06) | |  |  |
| cg19314992 | ACER3 | rs7927658 | 0.2230112 | 0.816497487 | 0.2441268 | 0.93 (0.83 - 1.05) | |  |  |
| cg09721595 | THRSP | rs10793281 | 0.3577117 | 0.874070513 | 0.07949181 | 0.99 (0.97 - 1.01) | |  |  |
| cg23705113 | THRSP | rs659758 | 0.9800234 | 0.99749749 | 0.890745 | 1 (0.9 - 1.11) |  |  |  |
| cg21864730 | THRSP | rs646630 | 0.5355741 | 0.922827354 | 0.7824419 | 0.97 (0.87 - 1.08) | |  |  |
| cg24769381 | GAB2 | rs2292572 | 0.8061121 | 0.975181307 | 0.1234368 | 1 (0.98 - 1.01) | |  |  |
| cg05783135 | GAB2 | rs78975162 | 0.936632 | 0.994575934 | 0.576013 | 1.01 (0.79 - 1.29) | |  |  |
| cg08481002 | GAB2 | rs2090095 | 0.8117521 | 0.97617406 | 0.09384258 | 0.99 (0.9 - 1.09) | |  |  |
| cg18974921 | GAB2 | rs4945275 | 0.6340022 | 0.944551386 | 0.08978321 | 0.98 (0.92 - 1.05) | |  |  |
| cg22814480 | ME3 | rs34405620 | 0.1504231 | 0.753783376 | 0.6838377 | 1.06 (0.98 - 1.16) | |  |  |
| cg21067465 | ME3 | rs10898507 | 0.1757178 | 0.77607395 | 0.05599401 | 0.95 (0.88 - 1.02) | |  |  |
| cg11602041 | ME3 | rs4245423 | 0.3300705 | 0.864919186 | 0.04482122 | 0.98 (0.94 - 1.02) | |  |  |
| cg23668581 | ME3 | rs7120444 | 0.7502049 | 0.96647031 | 0.01176039 | 1 (0.97 - 1.02) | |  |  |
| cg19918734 | ME3 | rs4943952 | 0.4481173 | 0.90142184 | 0.0121596 | 1.04 (0.94 - 1.14) | |  |  |
| cg02493602 | ME3 | rs12098937 | 0.3959633 | 0.886947515 | 0.008111195 | 0.99 (0.95 - 1.02) | |  |  |
| cg12030550 | ME3 | rs12098937 | 0.396404 | 0.887037757 | 0.009630253 | 0.98 (0.93 - 1.03) | |  |  |
| cg15698545 | ME3 | rs12098937 | 0.3959186 | 0.886947515 | 0.005224602 | 0.99 (0.95 - 1.02) | |  |  |
| cg14883291 | ME3 | rs12098937 | 0.3964182 | 0.887037757 | 0.01370086 | 0.98 (0.93 - 1.03) | |  |  |
| cg03646605 | ME3 | rs12098937 | 0.3961744 | 0.886948273 | 0.007351653 | 0.98 (0.94 - 1.02) | |  |  |
| cg05705813 | ME3 | rs12098937 | 0.3970962 | 0.887037757 | 0.008264842 | 0.97 (0.91 - 1.04) | |  |  |
| cg03955932 | ME3 | rs12098937 | 0.3958222 | 0.886947515 | 0.01146455 | 0.99 (0.96 - 1.02) | |  |  |
| cg08412316 | MTMR2 | rs78524323 | 0.7974401 | 0.973815381 | 0.1455219 | 1.01 (0.96 - 1.05) | |  |  |
| cg18733315 | MMP1 | rs534191 | 0.6144594 | 0.941074865 | 0.1130653 | 1.01 (0.97 - 1.05) | |  |  |
| cg03020863 | PDGFD | rs12226274 | 0.1911393 | 0.791715531 | 0.5264469 | 0.99 (0.97 - 1.01) | |  |  |
| cg04228039 | PDGFD | rs361261 | 0.3133235 | 0.85912998 | 0.04813638 | 0.95 (0.87 - 1.05) | |  |  |
| cg12686407 | PDGFD | rs361259 | 0.3092053 | 0.858221866 | 0.06456593 | 0.96 (0.9 - 1.04) | |  |  |
| cg14994056 | ACAT1 | rs10890813 | 0.7024435 | 0.958519592 | 0.3010464 | 0.98 (0.87 - 1.1) | |  |  |
| cg08152564 | ACAT1 | rs10890813 | 0.702344 | 0.958519592 | 0.1529414 | 0.98 (0.88 - 1.09) | |  |  |
| cg04873221 | ACAT1 | rs11212515 | 0.7329862 | 0.963378595 | 0.1598323 | 1.01 (0.97 - 1.04) | |  |  |
| cg19829446 | ACAT1 | rs10890813 | 0.7018997 | 0.958390436 | 0.1722734 | 1.01 (0.96 - 1.06) | |  |  |
| cg24079790 | ACAT1 | rs112087419 | 0.9928607 | 0.998800437 | 0.1751961 | 1 (0.88 - 1.14) | |  |  |
| cg20364660 | FDX1 | rs12279913 | 0.3957599 | 0.886947515 | 0.8973802 | 1.02 (0.97 - 1.08) | |  |  |
| cg23026420 | PPP2R1B | rs4936691 | 0.5742537 | 0.932092124 | 0.6341915 | 1.03 (0.92 - 1.16) | |  |  |
| cg09085632 | PPP2R1B | rs4936691 | 0.5725808 | 0.931802619 | 0.1020817 | 1.01 (0.98 - 1.03) | |  |  |
| cg17468440 | PPP2R1B | rs10502148 | 0.3030554 | 0.857248999 | 0.4488748 | 1.06 (0.95 - 1.18) | |  |  |
| cg18962750 | DLAT | rs514615 | 0.6573681 | 0.948152488 | 0.6874835 | 0.99 (0.96 - 1.03) | |  |  |
| cg06437417 | DLAT | rs12225443 | 0.7818235 | 0.971097906 | 0.7748596 | 0.99 (0.89 - 1.09) | |  |  |
| cg12532791 | SDHD | rs12790529 | 0.7370252 | 0.964441354 | 0.6044328 | 0.98 (0.88 - 1.09) | |  |  |
| cg12556569 | APOA5 | rs7118999 | 0.4296974 | 0.895760661 | 0.329376 | 1.01 (0.99 - 1.02) | |  |  |
| cg12324426 | APOA4 | rs78347254 | 0.9149479 | 0.992146969 |  | 1 (0.95 - 1.05) | |  |  |
| cg15950203 | APOA4 | rs2070668 | 0.3721543 | 0.87916487 | 0.8939002 | 1.06 (0.94 - 1.19) | |  |  |
| cg08985259 | APOC3 | rs2542050 | 0.3316772 | 0.865816922 | 0.892905 | 0.99 (0.96 - 1.01) | |  |  |
| cg03742763 | APOC3 | rs2216311 | 0.3390592 | 0.868140958 | 0.5764964 | 0.96 (0.87 - 1.05) | |  |  |
| cg20957428 | APOC3 | rs2854116 | 0.3567378 | 0.873584952 | 0.5595164 | 1.04 (0.95 - 1.14) | |  |  |
| cg18170454 | APOC3 | rs2854117 | 0.8678849 | 0.986157632 | 0.5497102 | 0.99 (0.9 - 1.09) | |  |  |
| cg20386255 | APOC3 | rs5095 | 0.1353556 | 0.738323337 | 0.958904 | 0.91 (0.81 - 1.03) | |  |  |
| cg13090478 | APOA1 | rs5094 | 0.4733016 | 0.908168812 | 0.9994658 | 0.97 (0.89 - 1.05) | |  |  |
| cg24984312 | APOA1 | rs12718463 | 0.5462494 | 0.925706903 | 0.8725174 | 0.95 (0.81 - 1.12) | |  |  |
| cg19324627 | APOA1 | rs7130973 | 0.450612 | 0.902173641 | 0.9997736 | 1.05 (0.92 - 1.2) | |  |  |
| cg09558982 | APOA1 | rs670 | 0.2089018 | 0.805950731 | 0.1089835 | 0.99 (0.97 - 1.01) | |  |  |
| cg10779718 | PAFAH1B2 | rs7120565 | 0.3286137 | 0.864532027 | 0.6884511 | 0.99 (0.97 - 1.01) | |  |  |
| cg21014238 | PAFAH1B2 | rs236919 | 0.4631317 | 0.905275149 | 0.83764 | 1.02 (0.97 - 1.08) | |  |  |
| cg01368799 | PAFAH1B2 | rs10892080 | 0.3477677 | 0.871431694 | 0.5413339 | 0.97 (0.92 - 1.03) | |  |  |
| cg07721852 | TREH | rs1790187 | 0.5996851 | 0.937450756 | 0.2108629 | 1.04 (0.9 - 1.21) | |  |  |
| cg26062581 | TREH | rs11216985 | 0.0951302 | 0.70058811 | 0.6343312 | 1.09 (0.99 - 1.19) | |  |  |
| cg10582858 | SC5DL | rs12288505 | 0.2242234 | 0.816922402 | 0.2709267 | 1.03 (0.98 - 1.08) | |  |  |
| cg05420867 | SC5DL | rs10892695 | 0.7910729 | 0.972547861 | 0.1455375 | 1.01 (0.94 - 1.09) | |  |  |
| cg19462635 | SC5DL | rs1560407 | 0.2321474 | 0.821697397 | 0.500898 | 1.04 (0.97 - 1.11) | |  |  |
| cg11268190 | TNFRSF1A | rs1800692 | 0.2277792 | 0.819226395 | 0.004138612 | 0.98 (0.95 - 1.01) | |  |  |
| cg00556515 | TNFRSF1A | rs4149570 | 0.3351883 | 0.866861176 | 0.002488997 | 0.99 (0.96 - 1.01) | |  |  |
| cg09043214 | TNFRSF1A | rs4149570 | 0.3353865 | 0.866910117 | 0.00316365 | 0.98 (0.95 - 1.02) | |  |  |
| cg23752651 | TNFRSF1A | rs4149570 | 0.336448 | 0.867602161 | 0.006138049 | 0.97 (0.92 - 1.03) | |  |  |
| cg14009561 | TNFRSF1A | rs4149570 | 0.3356076 | 0.867100961 | 0.003944089 | 0.98 (0.94 - 1.02) | |  |  |
| cg23320693 | TNFRSF1A | rs4149570 | 0.3377666 | 0.867614935 | 0.01059077 | 0.96 (0.89 - 1.04) | |  |  |
| cg10671054 | TNFRSF1A | rs2228576 | 0.983869 | 0.99750645 | 0.003207316 | 1 (0.9 - 1.11) |  |  |  |
| cg00990212 | GAPDH | rs2109430 | 0.06679559 | 0.656949719 | 0.1229878 | 1.11 (0.99 - 1.24) | |  |  |
| cg26276120 | TPI1 | rs2071065 | 0.8648936 | 0.985783659 | 0.8698505 | 1 (0.95 - 1.05) | |  |  |
| cg12119858 | ENO2 | rs11829429 | 0.6865596 | 0.95502799 | 0.7895782 | 0.99 (0.94 - 1.04) | |  |  |
| cg04604946 | ENO2 | rs1061223 | 0.8185995 | 0.977686475 | 0.736862 | 1.01 (0.91 - 1.13) | |  |  |
| cg19594606 | ENO2 | rs7955787 | 0.7335907 | 0.963754018 | 0.6558326 | 0.98 (0.88 - 1.09) | |  |  |
| cg26959580 | PEX5 | rs12312641 | 0.4545667 | 0.9032195 | 0.6675048 | 0.98 (0.92 - 1.04) | |  |  |
| cg20143982 | PEX5 | rs2290241 | 0.06983904 | 0.663440043 | 0.9447327 | 0.95 (0.9 - 1) |  |  |  |
| cg10086328 | PEX5 | rs34132061 | 0.07146148 | 0.666536827 | 0.9237811 | 0.95 (0.89 - 1) | |  |  |
| cg17525411 | PEX5 | rs2290241 | 0.07014649 | 0.664135727 | 0.8522357 | 0.95 (0.89 - 1) | |  |  |
| cg22812457 | PEX5 | rs2290241 | 0.0707524 | 0.664276538 | 0.7596298 | 0.94 (0.88 - 1.01) | |  |  |
| cg22503354 | PEX5 | rs2290241 | 0.06953062 | 0.663203956 | 0.896174 | 0.95 (0.9 - 1) |  |  |  |
| cg26515676 | PEX5 | rs2290241 | 0.07609886 | 0.671985711 |  | 0.91 (0.83 - 1.01) | |  |  |
| cg17878425 | PEX5 | rs7310539 | 0.6121019 | 0.94084644 | 0.09452633 | 1.03 (0.93 - 1.13) | |  |  |
| cg15028756 | PEX5 | rs3782920 | 0.8499503 | 0.983511817 | 0.8555219 | 1.01 (0.95 - 1.06) | |  |  |
| cg15754084 | PEX5 | rs10770616 | 0.4693013 | 0.907052044 | 0.7482279 | 0.98 (0.92 - 1.04) | |  |  |
| cg20154457 | PEX5 | rs10841345 | 0.5095189 | 0.91691468 | 0.8968081 | 0.99 (0.96 - 1.02) | |  |  |
| cg07052231 | PEX5 | rs7962563 | 0.781458 | 0.970875947 | 0.9622498 | 0.99 (0.95 - 1.04) | |  |  |
| cg07274880 | PEX5 | rs142668434 | 0.147228 | 0.750975066 | 0.5373531 | 1.02 (0.99 - 1.06) | |  |  |
| cg00954230 | OLR1 | rs11053630 | 0.7321182 | 0.963155736 | 0.9479798 | 1.03 (0.88 - 1.19) | |  |  |
| cg17768691 | PLBD1 | rs2032762 | 0.6952919 | 0.957247838 | 0.5355237 | 1.02 (0.93 - 1.12) | |  |  |
| cg11905611 | PLBD1 | rs10846019 | 0.2940228 | 0.854550384 | 0.4643354 | 1.06 (0.95 - 1.18) | |  |  |
| cg19725903 | PLBD1 | rs2032762 | 0.695153 | 0.957247838 | 0.5878279 | 1.02 (0.94 - 1.09) | |  |  |
| cg25642234 | PLBD1 | rs2032762 | 0.6951988 | 0.957247838 | 0.5846366 | 1.02 (0.94 - 1.1) | |  |  |
| cg04473902 | PLBD1 | rs10846023 | 0.6775289 | 0.953302966 | 0.4483928 | 1.02 (0.91 - 1.15) | |  |  |
| cg23682634 | DERA | rs7980712 | 0.7906473 | 0.972509816 |  | 0.98 (0.84 - 1.14) | |  |  |
| cg24806623 | PLCZ1 | rs7974908 | 0.9525539 | 0.996245208 | 0.08363525 | 1 (0.95 - 1.05) | |  |  |
| cg09431970 | PLEKHA5 | rs10841144 | 0.697865 | 0.957450966 | 0.8330638 | 1.01 (0.96 - 1.07) | |  |  |
| cg20315057 | PLEKHA5 | rs11044405 | 0.8056217 | 0.975123724 | 0.2006268 | 1.01 (0.9 - 1.14) | |  |  |
| cg02471346 | PLEKHA5 | rs10505836 | 0.6856216 | 0.954724977 | 0.7364688 | 0.99 (0.94 - 1.04) | |  |  |
| cg19755459 | PLEKHA5 | rs80051304 | 0.8619951 | 0.985444341 | 0.7715437 | 1.01 (0.93 - 1.1) | |  |  |
| cg04061752 | PLEKHA5 | rs1567947 | 0.278177 | 0.847879387 | 0.7823726 | 0.96 (0.89 - 1.03) | |  |  |
| cg23028209 | PLEKHA5 | rs11044433 | 0.09120009 | 0.697871791 | 0.1878196 | 1.12 (0.98 - 1.27) | |  |  |
| cg04579507 | SLCO1B1 | rs7310629 | 0.4960652 | 0.914498268 | 0.238867 | 1.01 (0.97 - 1.06) | |  |  |
| cg04354474 | LDHB | rs141240649 | 0.2791836 | 0.848080971 | 0.5280419 | 1.06 (0.95 - 1.18) | |  |  |
| cg10668933 | CMAS | rs6416226 | 0.8633691 | 0.985444341 | 0.3464917 | 0.99 (0.87 - 1.12) | |  |  |
| cg17839399 | ETNK1 | rs12308991 | 0.1471617 | 0.750975066 | 0.06374975 | 1.08 (0.97 - 1.19) | |  |  |
| cg02723291 | ETNK1 | rs74371575 | 0.1468128 | 0.750811937 | 0.602292 | 1.07 (0.98 - 1.17) | |  |  |
| cg17197538 | KRAS | rs7311692 | 0.06625499 | 0.656949719 | 0.566874 | 0.87 (0.75 - 1.01) | |  |  |
| cg13442495 | KRAS | rs11047917 | 0.1724339 | 0.77390698 | 0.200118 | 0.95 (0.88 - 1.02) | |  |  |
| cg20074699 | KRAS | rs11047917 | 0.1744851 | 0.7756101 | 0.3235939 | 0.93 (0.85 - 1.03) | |  |  |
| cg11646730 | KRAS | rs11047917 | 0.1717385 | 0.773315474 | 0.2640416 | 0.96 (0.9 - 1.02) | |  |  |
| cg07692853 | KRAS | rs11047917 | 0.1760346 | 0.77637069 | 0.861004 | 0.93 (0.83 - 1.04) | |  |  |
| cg27093546 | KRAS | rs11047908 | 0.2684335 | 0.842677807 | 0.1892069 | 0.95 (0.86 - 1.04) | |  |  |
| cg01269191 | KRAS | rs7311692 | 0.05702604 | 0.639416935 | 0.4125965 | 0.92 (0.84 - 1) | |  |  |
| cg25134647 | KRAS | rs4963868 | 0.9830502 | 0.99749749 | 0.557929 | 1 (0.98 - 1.02) | |  |  |
| cg09265876 | KRAS | rs7952763 | 0.3669954 | 0.87782952 | 0.769353 | 1.03 (0.97 - 1.08) | |  |  |
| cg25451893 | KRAS | rs7961134 | 0.2746743 | 0.845420364 | 0.1960564 | 1.03 (0.98 - 1.08) | |  |  |
| cg13910046 | KRAS | rs11047990 | 0.3647065 | 0.87693789 | 0.447785 | 0.97 (0.92 - 1.03) | |  |  |
| cg13412066 | KRAS | rs10743561 | 0.2099572 | 0.807456134 | 0.4522431 | 1.04 (0.98 - 1.11) | |  |  |
| cg25572367 | KRAS | rs76351655 | 0.7446569 | 0.965761902 | 0.2653746 | 0.99 (0.93 - 1.06) | |  |  |
| cg01354782 | ITPR2 | rs61914393 | 0.3203393 | 0.862134112 | 0.9590601 | 1.06 (0.95 - 1.19) | |  |  |
| cg16846691 | ITPR2 | rs11048709 | 0.5910363 | 0.93585134 | 0.9620532 | 0.99 (0.94 - 1.03) | |  |  |
| cg26320601 | ITPR2 | rs142205629 | 0.8567961 | 0.985006713 | 0.9776794 | 0.99 (0.94 - 1.06) | |  |  |
| cg09257092 | ITPR2 | rs142205629 | 0.8567679 | 0.985006713 | 0.9691159 | 1 (0.96 - 1.03) | |  |  |
| cg04837533 | ITPR2 | rs11048709 | 0.5913298 | 0.93585134 | 0.9741805 | 0.98 (0.92 - 1.05) | |  |  |
| cg10037905 | ITPR2 | rs11048710 | 0.5953812 | 0.936227607 | 0.9724564 | 0.97 (0.85 - 1.1) | |  |  |
| cg20787196 | ITPR2 | rs11048709 | 0.5915039 | 0.93585134 | 0.9674598 | 0.98 (0.9 - 1.06) | |  |  |
| cg13891121 | ITPR2 | rs11048709 | 0.5914293 | 0.93585134 | 0.9636119 | 0.98 (0.91 - 1.06) | |  |  |
| cg07645296 | ITPR2 | rs11048709 | 0.5911057 | 0.93585134 | 0.974338 | 0.99 (0.94 - 1.04) | |  |  |
| cg19112275 | ITPR2 | rs2881006 | 0.1852449 | 0.786149135 | 0.3719528 | 0.91 (0.79 - 1.05) | |  |  |
| cg18784875 | ITPR2 | rs11048749 | 0.4688532 | 0.906973505 | 0.8853436 | 0.99 (0.96 - 1.02) | |  |  |
| cg01982833 | MED21 | rs3782317 | 0.2157083 | 0.811540652 | 0.8699821 | 1.04 (0.98 - 1.12) | |  |  |
| cg01844176 | MED21 | rs898800 | 0.9551745 | 0.996245208 | 0.8315897 | 1 (0.86 - 1.15) | |  |  |
| cg06086198 | FAR2 | rs11050149 | 0.3036847 | 0.857248999 | 0.7752387 | 0.97 (0.93 - 1.02) | |  |  |
| cg21522988 | FAR2 | rs11050173 | 0.6982129 | 0.957455844 | 0.1092988 | 0.98 (0.89 - 1.08) | |  |  |
| cg16970926 | FAR2 | rs10771502 | 0.8170602 | 0.976920897 | 0.4010326 | 1.01 (0.94 - 1.08) | |  |  |
| cg18809074 | FAR2 | rs117893886 | 0.5099197 | 0.91691468 | 0.164828 | 0.97 (0.9 - 1.05) | |  |  |
| cg02714932 | VDR | rs4237855 | 0.9743196 | 0.997273118 | 0.8923123 | 1 (0.95 - 1.05) | |  |  |
| cg02547054 | VDR | rs4516035 | 0.3516493 | 0.872055283 | 0.736139 | 0.95 (0.84 - 1.06) | |  |  |
| cg25953788 | LALBA | rs11168619 | 0.9486797 | 0.995907429 | 0.04041078 | 1 (0.92 - 1.09) | |  |  |
| cg26266429 | ADCY6 | rs11168739 | 0.3438348 | 0.870008312 | 0.07428629 | 0.94 (0.84 - 1.06) | |  |  |
| cg11661914 | ADCY6 | rs11168740 | 0.2861776 | 0.851128133 | 0.07601469 | 1.01 (0.99 - 1.04) | |  |  |
| cg11037512 | ADCY6 | rs68003719 | 0.363011 | 0.876356397 | 0.05640617 | 1.03 (0.97 - 1.09) | |  |  |
| cg14258504 | ADCY6 | rs77559288 | 0.2910352 | 0.853054016 | 0.7766332 | 1.08 (0.94 - 1.24) | |  |  |
| cg10441828 | PRKAG1 | rs10875914 | 0.4802502 | 0.909109548 | 0.06568394 | 0.99 (0.95 - 1.02) | |  |  |
| cg27522367 | GPD1 | rs836178 | 0.2336799 | 0.822467683 | 0.9678385 | 0.93 (0.84 - 1.04) | |  |  |
| cg06168149 | GPD1 | rs836178 | 0.230097 | 0.82066468 | 0.8863213 | 0.95 (0.87 - 1.03) | |  |  |
| cg24210717 | GPD1 | rs836178 | 0.2293246 | 0.820537304 | 0.9260267 | 0.95 (0.88 - 1.03) | |  |  |
| cg21151061 | GPD1 | rs836175 | 0.2307867 | 0.82093374 | 0.9548303 | 0.95 (0.87 - 1.04) | |  |  |
| cg23906641 | SOAT2 | rs822688 | 0.3554814 | 0.872952434 | 0.2040513 | 1.04 (0.95 - 1.14) | |  |  |
| cg23468479 | SOAT2 | rs12227928 | 0.467114 | 0.906186089 | 0.1933571 | 1.04 (0.94 - 1.15) | |  |  |
| cg25897251 | SOAT2 | rs12227928 | 0.463999 | 0.905380666 | 0.3075994 | 1.02 (0.98 - 1.06) | |  |  |
| cg15354065 | DGKA | rs1681070 | 0.2372039 | 0.824903673 | 0.04949915 | 0.94 (0.84 - 1.04) | |  |  |
| cg26734620 | CS | rs11575234 | 0.1529736 | 0.755745639 | 0.3857521 | 0.96 (0.91 - 1.01) | |  |  |
| cg21922731 | HSD17B6 | rs74091699 | 0.8031952 | 0.97484376 | 0.6618993 | 1.01 (0.95 - 1.08) | |  |  |
| cg15470658 | LRP1 | rs12322902 | 0.8217296 | 0.97820278 | 0.006351111 | 0.99 (0.92 - 1.07) | |  |  |
| cg27031632 | LRP1 | rs55909821 | 0.6721738 | 0.951746016 | 0.1600581 | 1.01 (0.95 - 1.08) | |  |  |
| cg25299319 | LRP1 | rs1800174 | 0.20869 | 0.805746951 | 0.05825703 | 1.05 (0.97 - 1.14) | |  |  |
| cg00693253 | LRP1 | rs1800181 | 0.2134119 | 0.810309387 | 0.02883962 | 1.01 (0.99 - 1.04) | |  |  |
| cg12146864 | LRP1 | rs11172124 | 0.5583499 | 0.929190562 | 0.01216779 | 0.97 (0.88 - 1.07) | |  |  |
| cg04850731 | SHMT2 | rs10783815 | 0.1876557 | 0.788007448 | 0.1732756 | 1.08 (0.96 - 1.21) | |  |  |
| cg11505661 | SHMT2 | rs10783815 | 0.1800754 | 0.780695638 | 0.08801504 | 1.04 (0.98 - 1.11) | |  |  |
| cg22215815 | SHMT2 | rs10783816 | 0.2930385 | 0.853993909 | 0.1068432 | 1.02 (0.98 - 1.07) | |  |  |
| cg09093210 | SHMT2 | rs10783815 | 0.1804316 | 0.780770031 | 0.1289275 | 1.04 (0.98 - 1.11) | |  |  |
| cg26396455 | SHMT2 | rs10783815 | 0.1860132 | 0.787063406 | 0.04593747 | 1.07 (0.97 - 1.19) | |  |  |
| cg05835276 | SHMT2 | rs10783815 | 0.1843083 | 0.785245017 | 0.04861571 | 1.06 (0.97 - 1.17) | |  |  |
| cg05441768 | SHMT2 | rs7301155 | 0.2988487 | 0.856736849 | 0.102561 | 1.05 (0.95 - 1.17) | |  |  |
| cg01682504 | SHMT2 | rs10783815 | 0.182963 | 0.784108117 | 0.07652259 | 0.95 (0.87 - 1.03) | |  |  |
| cg04193484 | SHMT2 | rs7489231 | 0.1746427 | 0.7756101 | 0.05349988 | 0.96 (0.9 - 1.02) | |  |  |
| cg20416037 | PIP4K2C | rs775245 | 0.9715245 | 0.997273118 | 0.133039 | 1 (0.93 - 1.07) | |  |  |
| cg25133016 | PIP4K2C | rs775245 | 0.9715246 | 0.997273118 | 0.1713642 | 1 (0.92 - 1.09) | |  |  |
| cg05694847 | PIP4K2C | rs11613457 | 0.2886291 | 0.851857328 | 0.5129245 | 1.05 (0.96 - 1.15) | |  |  |
| cg26459339 | PIP4K2C | rs11172262 | 0.1714095 | 0.77295689 | 0.1713947 | 1.01 (0.99 - 1.04) | |  |  |
| cg09932758 | B4GALNT1 | rs774898 | 0.8737267 | 0.986724534 | 0.230755 | 0.99 (0.93 - 1.06) | |  |  |
| cg02713352 | B4GALNT1 | rs715930 | 0.5038871 | 0.916317278 | 0.4169329 | 0.99 (0.94 - 1.03) | |  |  |
| cg24750156 | B4GALNT1 | rs2619469 | 0.868257 | 0.986245494 | 0.4824356 | 0.99 (0.88 - 1.11) | |  |  |
| cg05600740 | B4GALNT1 | rs774898 | 0.8737301 | 0.986724534 | 0.3953815 | 0.99 (0.93 - 1.07) | |  |  |
| cg09163317 | B4GALNT1 | rs12322482 | 0.6137616 | 0.940859062 | 0.4696281 | 1.03 (0.93 - 1.14) | |  |  |
| cg24905909 | B4GALNT1 | rs774899 | 0.8692754 | 0.986468706 | 0.1795804 | 1.01 (0.93 - 1.09) | |  |  |
| cg03829839 | CDK4 | rs2072052 | 0.3798558 | 0.881250655 | 0.5255218 | 1.03 (0.96 - 1.1) | |  |  |
| cg13500029 | GLIPR1 | rs10879922 | 0.1620587 | 0.764549009 | 0.4843384 | 1.02 (0.99 - 1.05) | |  |  |
| cg01554451 | GLIPR1 | rs11180522 | 0.156326 | 0.759193128 | 0.1271852 | 1.07 (0.98 - 1.16) | |  |  |
| cg19668034 | GLIPR1 | rs3809118 | 0.6098207 | 0.940558433 | 0.2165874 | 0.99 (0.93 - 1.04) | |  |  |
| cg14568971 | GLIPR1 | rs150188607 | 0.7242758 | 0.961946687 |  | 0.9 (0.48 - 1.66) | |  |  |
| cg01528542 | ACSS3 | rs73145380 | 0.9106298 | 0.991668188 | 0.9848073 | 0.99 (0.91 - 1.09) | |  |  |
| cg12564437 | LTA4H | rs7306046 | 0.9973376 | 0.999614083 | 0.1031685 | 1 (0.93 - 1.08) | |  |  |
| cg12924262 | CHPT1 | rs2559855 | 0.2259319 | 0.81796385 | 0.03795829 | 0.98 (0.95 - 1.01) | |  |  |
| cg01020980 | CHPT1 | rs10778139 | 0.6494756 | 0.946505271 | 0.1854352 | 1.03 (0.91 - 1.16) | |  |  |
| cg24337881 | CHPT1 | rs2695287 | 0.2231904 | 0.816540718 | 0.09443282 | 0.93 (0.83 - 1.04) | |  |  |
| cg03788004 | CHPT1 | rs2559855 | 0.2268463 | 0.818501532 | 0.04575225 | 1.03 (0.98 - 1.08) | |  |  |
| cg15068132 | CHPT1 | rs11110959 | 0.7848679 | 0.971821346 | 0.1390627 | 0.99 (0.91 - 1.08) | |  |  |
| cg21050282 | NFYB | rs4964531 | 0.47298 | 0.908168812 | 0.06181216 | 0.99 (0.97 - 1.01) | |  |  |
| cg04063896 | NFYB | rs11111916 | 0.1296854 | 0.734159084 | 0.9782861 | 1.04 (0.99 - 1.08) | |  |  |
| cg23598542 | NFYB | rs11111917 | 0.1332938 | 0.737181027 | 0.9850226 | 1.06 (0.98 - 1.15) | |  |  |
| cg25282972 | NFYB | rs11111916 | 0.1308671 | 0.735151407 | 0.9843807 | 1.05 (0.99 - 1.11) | |  |  |
| cg25684105 | TXNRD1 | rs4964635 | 0.8773781 | 0.986942168 | 0.07649434 | 1 (0.97 - 1.04) | |  |  |
| cg25273343 | TXNRD1 | rs10778318 | 0.8739239 | 0.986724534 | 0.6202673 | 1 (0.98 - 1.03) | |  |  |
| cg20324369 | TXNRD1 | rs10861202 | 0.9515175 | 0.996245208 | 0.3125564 | 1 (0.89 - 1.14) | |  |  |
| cg15775217 | TXNRD1 | rs34195484 | 0.9832516 | 0.99749749 | 0.6867642 | 1 (0.98 - 1.02) | |  |  |
| cg11659394 | TXNRD1 | rs12811618 | 0.4581398 | 0.903711216 | 0.8783217 | 0.98 (0.92 - 1.04) | |  |  |
| cg03331715 | TXNRD1 | rs10861185 | 0.5058064 | 0.916665705 | 0.7356753 | 1.03 (0.95 - 1.11) | |  |  |
| cg27479759 | TXNRD1 | rs3935020 | 0.9360382 | 0.994575934 | 0.06524847 | 1 (0.94 - 1.05) | |  |  |
| cg11747499 | DAO | rs2375015 | 0.9602505 | 0.996245208 | 0.2870736 | 1 (0.92 - 1.09) | |  |  |
| cg03868278 | DAO | rs2052410 | 0.9459777 | 0.995613646 | 0.1680506 | 1 (0.95 - 1.05) | |  |  |
| cg24460369 | ACACB | rs34263 | 0.3730671 | 0.879218269 | 0.363042 | 1.04 (0.95 - 1.15) | |  |  |
| cg10651121 | ACACB | rs165969 | 0.881808 | 0.987240285 | 0.8589616 | 1 (0.93 - 1.06) | |  |  |
| cg08335389 | ACACB | rs3219211 | 0.9121336 | 0.991697329 | 0.9309812 | 1.01 (0.92 - 1.1) | |  |  |
| cg00095930 | ACACB | rs16939972 | 0.2745846 | 0.845420364 | 0.3883083 | 0.98 (0.96 - 1.01) | |  |  |
| cg20025086 | ACACB | rs16939972 | 0.2749673 | 0.845420364 | 0.3063623 | 0.98 (0.95 - 1.02) | |  |  |
| cg26872224 | ACACB | rs16939972 | 0.2748595 | 0.845420364 | 0.3396551 | 0.98 (0.95 - 1.02) | |  |  |
| cg00806900 | ACACB | rs34972531 | 0.9291128 | 0.993607022 | 0.9791565 | 1 (0.93 - 1.08) | |  |  |
| cg06002638 | ACACB | rs10849901 | 0.4483938 | 0.90142184 | 0.7976814 | 0.96 (0.88 - 1.06) | |  |  |
| cg15996769 | ACACB | rs12426388 | 0.5040526 | 0.916317278 | 0.859055 | 0.96 (0.86 - 1.07) | |  |  |
| cg19598685 | ACACB | rs11609393 | 0.8220499 | 0.978213619 | 0.775016 | 1 (0.97 - 1.03) | |  |  |
| cg06516150 | ACACB | rs2268405 | 0.9736699 | 0.997273118 | 0.9400497 | 1 (0.94 - 1.07) | |  |  |
| cg08866695 | ACACB | rs34273 | 0.5963395 | 0.936631329 | 0.7852985 | 1.02 (0.96 - 1.08) | |  |  |
| cg04777824 | ACACB | rs2300461 | 0.9098555 | 0.991445541 | 0.9713162 | 0.99 (0.88 - 1.13) | |  |  |
| cg27604975 | MVK | rs10744826 | 0.3689623 | 0.878063151 | 0.03525006 | 1.03 (0.97 - 1.09) | |  |  |
| cg05360138 | MVK | rs67325197 | 0.3120818 | 0.85912998 | 0.1208814 | 0.93 (0.82 - 1.07) | |  |  |
| cg16176573 | MVK | rs10774779 | 0.4292814 | 0.895626154 | 0.4651128 | 0.96 (0.85 - 1.07) | |  |  |
| cg18632291 | MVK | rs17670606 | 0.5715878 | 0.931651393 | 0.7365919 | 0.97 (0.87 - 1.08) | |  |  |
| cg11367159 | MVK | rs11067376 | 0.5885958 | 0.935608697 | 0.07083792 | 0.99 (0.96 - 1.02) | |  |  |
| cg10504392 | MVK | rs11067376 | 0.5885938 | 0.935608697 | 0.07001122 | 0.99 (0.96 - 1.02) | |  |  |
| cg13954206 | MVK | rs118109858 | 0.5623478 | 0.93016413 | 0.03194085 | 0.99 (0.96 - 1.02) | |  |  |
| cg06957551 | MVK | rs118109858 | 0.5623392 | 0.93016413 | 0.03205599 | 0.99 (0.97 - 1.02) | |  |  |
| cg05155784 | GLTP | rs73417580 | 0.3318246 | 0.865874575 | 0.9698398 | 1.04 (0.96 - 1.13) | |  |  |
| cg20045970 | GLTP | rs11068817 | 0.3342343 | 0.866783394 | 0.9665041 | 1.04 (0.96 - 1.11) | |  |  |
| cg09298818 | PPP1CC | rs7975139 | 0.3583026 | 0.874493396 | 0.06996738 | 0.94 (0.83 - 1.07) | |  |  |
| cg04375036 | PPP1CC | rs17682644 | 0.07794187 | 0.674602752 | 0.04895508 | 0.9 (0.79 - 1.01) | |  |  |
| cg22158248 | ALDH2 | rs17628828 | 0.09310178 | 0.699508113 | 0.7477854 | 1.05 (0.99 - 1.11) | |  |  |
| cg19186356 | ALDH2 | rs10744773 | 0.847483 | 0.983082241 | 0.1573499 | 1.01 (0.92 - 1.1) | |  |  |
| cg02467956 | MED13L | rs114428224 | 0.05787895 | 0.640640266 | 0.02477272 | 1.31 (0.99 - 1.73) | |  |  |
| cg08718098 | MED13L | rs61937393 | 0.5092799 | 0.91691468 | 0.0664847 | 0.97 (0.89 - 1.06) | |  |  |
| cg04944536 | MED13L | rs7302250 | 0.5911117 | 0.93585134 | 0.7617303 | 0.97 (0.88 - 1.08) | |  |  |
| cg13645530 | MED13L | rs7297772 | 0.593185 | 0.93585134 | 0.9698733 | 0.97 (0.87 - 1.08) | |  |  |
| cg14836636 | PRKAB1 | rs11064873 | 0.4621492 | 0.904785429 | 0.473137 | 0.97 (0.88 - 1.06) | |  |  |
| cg12150946 | PLA2G1B | rs111285636 | 0.6346751 | 0.944551386 | 0.4495907 | 1.02 (0.94 - 1.1) | |  |  |
| cg22335246 | PLA2G1B | rs2070873 | 0.6603662 | 0.948965127 | 0.8427704 | 0.97 (0.86 - 1.1) | |  |  |
| cg20313400 | PLA2G1B | rs2070873 | 0.6595798 | 0.948660815 | 0.3325205 | 0.99 (0.97 - 1.02) | |  |  |
| cg26872792 | PLA2G1B | rs2070873 | 0.6595531 | 0.948660815 | 0.3343123 | 1 (0.97 - 1.02) | |  |  |
| cg15611176 | PLA2G1B | rs2070873 | 0.659558 | 0.948660815 | 0.330478 | 0.99 (0.97 - 1.02) | |  |  |
| cg16396488 | PLA2G1B | rs11065075 | 0.5772309 | 0.933016088 | 0.05086528 | 0.98 (0.9 - 1.06) | |  |  |
| cg26214972 | PLA2G1B | rs61748115 | 0.836252 | 0.980682266 | 0.8174627 | 0.99 (0.92 - 1.07) | |  |  |
| cg12589972 | PLA2G1B | rs12427069 | 0.7030045 | 0.958541902 | 0.642237 | 0.99 (0.93 - 1.05) | |  |  |
| cg21721566 | ACADS | rs3021337 | 0.171055 | 0.77295689 | 0.2936074 | 1.02 (0.99 - 1.04) | |  |  |
| cg24768164 | ACADS | rs3021337 | 0.1709249 | 0.77295689 | 0.1460716 | 0.98 (0.96 - 1.01) | |  |  |
| cg27246729 | ACADS | rs3916 | 0.08289061 | 0.683223114 | 0.2211616 | 1.04 (1 - 1.08) | |  |  |
| cg10600917 | ACADS | rs3916 | 0.09007254 | 0.695768827 | 0.5001948 | 1.09 (0.99 - 1.21) | |  |  |
| cg27522780 | ACADS | rs34708625 | 0.09146515 | 0.698333861 | 0.2126463 | 1.08 (0.99 - 1.18) | |  |  |
| cg01535453 | ACADS | rs2066938 | 0.05048186 | 0.625787895 | 0.6400907 | 1.06 (1 - 1.12) | |  |  |
| cg13914990 | ACADS | rs1814851 | 0.06138725 | 0.645848884 | 0.1891108 | 1.03 (1 - 1.06) | |  |  |
| cg00293381 | ACADS | rs34491494 | 0.2314672 | 0.821320684 | 0.2082938 | 1.08 (0.95 - 1.21) | |  |  |
| cg21858483 | CAMKK2 | rs3817189 | 0.06103602 | 0.645504252 | 0.1814264 | 0.95 (0.91 - 1) | |  |  |
| cg17541002 | CAMKK2 | rs11615578 | 0.4422351 | 0.8997726 | 0.04489358 | 0.95 (0.85 - 1.08) | |  |  |
| cg14504499 | CAMKK2 | rs7965129 | 0.720971 | 0.96139968 | 0.5681131 | 1.02 (0.93 - 1.1) | |  |  |
| cg19120225 | PITPNM2 | rs73230051 | 0.6151881 | 0.941074865 | 0.7809816 | 1.01 (0.98 - 1.03) | |  |  |
| cg06742321 | PITPNM2 | rs10773921 | 0.7178292 | 0.96106857 | 0.8763746 | 0.99 (0.94 - 1.04) | |  |  |
| cg24623760 | PITPNM2 | rs117004589 | 0.6285208 | 0.944286575 | 0.8180074 | 0.99 (0.97 - 1.02) | |  |  |
| cg01687878 | PITPNM2 | rs1790129 | 0.4630222 | 0.905223322 | 0.4650467 | 1.01 (0.98 - 1.05) | |  |  |
| cg27473871 | PITPNM2 | rs1727318 | 0.7841865 | 0.971625701 | 0.3053969 | 1.01 (0.93 - 1.1) | |  |  |
| cg22775801 | PITPNM2 | rs4148856 | 0.9662999 | 0.996697851 | 0.6425656 | 1 (0.91 - 1.1) |  |  |  |
| cg16389456 | PITPNM2 | rs655293 | 0.9521212 | 0.996245208 | 0.5551615 | 1 (0.92 - 1.08) | |  |  |
| cg15265970 | NCOR2 | rs1702332 | 0.4991665 | 0.915121918 | 0.1700172 | 1.05 (0.92 - 1.19) | |  |  |
| cg13127920 | NCOR2 | rs10846657 | 0.7552482 | 0.966870715 | 0.2014512 | 1 (0.98 - 1.02) | |  |  |
| cg24766840 | NCOR2 | rs146690869 | 0.06848082 | 0.66024538 | 0.8414514 | 0.86 (0.74 - 1.01) | |  |  |
| cg23878260 | NCOR2 | rs73419849 | 0.1093855 | 0.712026971 | 0.08715322 | 0.99 (0.98 - 1) | |  |  |
| cg24094200 | NCOR2 | rs1263992 | 0.5077867 | 0.91691468 | 0.2848042 | 0.97 (0.9 - 1.05) | |  |  |
| cg07474670 | NCOR2 | rs2271139 | 0.3146098 | 0.859942033 | 0.287562 | 0.99 (0.98 - 1.01) | |  |  |
| cg22336491 | NCOR2 | rs2271139 | 0.3209965 | 0.862134112 | 0.2729487 | 1.06 (0.95 - 1.17) | |  |  |
| cg04257064 | NCOR2 | rs73223563 | 0.9077543 | 0.99097002 | 0.3546158 | 1 (0.95 - 1.06) | |  |  |
| cg24631609 | NCOR2 | rs10773085 | 0.3857044 | 0.883329892 | 0.9072628 | 0.99 (0.97 - 1.01) | |  |  |
| cg10283674 | NCOR2 | rs10773085 | 0.3875539 | 0.884648703 | 0.9204969 | 0.97 (0.91 - 1.04) | |  |  |
| cg10082088 | NCOR2 | rs7961196 | 0.8514386 | 0.984039902 | 0.8257146 | 1.01 (0.9 - 1.13) | |  |  |
| cg24975642 | NCOR2 | rs1702335 | 0.7510331 | 0.96647031 | 0.6935761 | 1.01 (0.97 - 1.05) | |  |  |
| cg12154538 | NCOR2 | rs1702335 | 0.7510377 | 0.96647031 | 0.6066109 | 1.01 (0.97 - 1.05) | |  |  |
| cg14951136 | NCOR2 | rs1702335 | 0.7510295 | 0.96647031 | 0.751777 | 1.01 (0.97 - 1.05) | |  |  |
| cg23021584 | NCOR2 | rs881290 | 0.9865649 | 0.998072385 | 0.7725206 | 1 (0.91 - 1.1) |  |  |  |
| cg16217368 | NCOR2 | rs881290 | 0.9865649 | 0.998072385 | 0.7808255 | 1 (0.91 - 1.1) |  |  |  |
| cg26581206 | NCOR2 | rs2018254 | 0.4632563 | 0.905290187 | 0.3469566 | 1.06 (0.91 - 1.23) | |  |  |
| cg13146040 | NCOR2 | rs75649450 | 0.2834235 | 0.850097001 | 0.03364306 | 0.96 (0.88 - 1.04) | |  |  |
| cg10996589 | NCOR2 | rs1798881 | 0.09410281 | 0.700136013 | 0.6009579 | 0.97 (0.93 - 1.01) | |  |  |
| cg13416396 | NCOR2 | rs837460 | 0.9088082 | 0.991234342 | 0.9753853 | 1 (0.92 - 1.09) | |  |  |
| cg11607710 | NCOR2 | rs58217600 | 0.3508776 | 0.872055283 | 0.1195554 | 0.99 (0.96 - 1.02) | |  |  |
| cg24626542 | NCOR2 | rs117804988 | 0.9833636 | 0.99749749 | 0.6164528 | 1 (0.87 - 1.16) | |  |  |
| cg13857025 | NCOR2 | rs837479 | 0.7600839 | 0.966899443 | 0.5761543 | 1.02 (0.91 - 1.13) | |  |  |
| cg16181859 | NCOR2 | rs837461 | 0.7177402 | 0.96106857 | 0.6061141 | 1.02 (0.93 - 1.12) | |  |  |
| cg23940356 | NCOR2 | rs10846683 | 0.331351 | 0.865666848 | 0.6370295 | 0.98 (0.93 - 1.02) | |  |  |
| cg13185702 | NCOR2 | rs12424705 | 0.1669794 | 0.769478101 | 0.6448166 | 1.03 (0.99 - 1.08) | |  |  |
| cg15645138 | NCOR2 | rs4765579 | 0.2580296 | 0.836399158 | 0.4426547 | 0.95 (0.86 - 1.04) | |  |  |
| cg12232388 | NCOR2 | rs10846683 | 0.3376385 | 0.867614935 | 0.3638436 | 0.94 (0.83 - 1.07) | |  |  |
| cg02798899 | NCOR2 | rs11057665 | 0.7278168 | 0.962973957 | 0.2063881 | 0.99 (0.93 - 1.05) | |  |  |
| cg18648169 | NCOR2 | rs4765577 | 0.3624717 | 0.8760677 | 0.3794615 | 0.97 (0.91 - 1.04) | |  |  |
| cg19355069 | NCOR2 | rs10846683 | 0.3345907 | 0.866861176 | 0.3751766 | 0.95 (0.87 - 1.05) | |  |  |
| cg03565777 | NCOR2 | rs4765577 | 0.3616957 | 0.875690193 | 0.3813294 | 0.98 (0.92 - 1.03) | |  |  |
| cg16757384 | NCOR2 | rs837481 | 0.4842177 | 0.910348961 | 0.3163455 | 0.99 (0.96 - 1.02) | |  |  |
| cg09719269 | NCOR2 | rs76497469 | 0.4817192 | 0.90942799 | 0.1307252 | 0.98 (0.93 - 1.04) | |  |  |
| cg01408363 | NCOR2 | rs885025 | 0.0838668 | 0.685550609 | 0.428039 | 0.93 (0.85 - 1.01) | |  |  |
| cg24847366 | NCOR2 | rs10846684 | 0.05230121 | 0.630814008 | 0.9644054 | 0.95 (0.91 - 1) | |  |  |
| cg00513984 | NCOR2 | rs10773093 | 0.2362465 | 0.824433804 | 0.6967073 | 0.94 (0.84 - 1.04) | |  |  |
| cg01842837 | NCOR2 | rs34086857 | 0.1222205 | 0.727444126 | 0.6167347 | 0.92 (0.83 - 1.02) | |  |  |
| cg26704293 | NCOR2 | rs1243024 | 0.6593012 | 0.948545432 | 0.02759546 | 1.01 (0.97 - 1.05) | |  |  |
| cg11358741 | NCOR2 | rs701044 | 0.1300853 | 0.734444175 | 0.03420704 | 1.08 (0.98 - 1.19) | |  |  |
| cg22697821 | NCOR2 | rs6488935 | 0.5203346 | 0.918602233 | 0.03642985 | 1.02 (0.96 - 1.09) | |  |  |
| cg23184252 | NCOR2 | rs11057734 | 0.7323431 | 0.963223508 | 0.5892335 | 0.98 (0.88 - 1.09) | |  |  |
| cg19888509 | NCOR2 | rs11057693 | 0.9802602 | 0.99749749 | 0.4626572 | 1 (0.89 - 1.13) | |  |  |
| cg05302218 | SCARB1 | rs10846748 | 0.05754025 | 0.640493749 | 0.311358 | 1.11 (1 - 1.23) | |  |  |
| cg09882144 | SCARB1 | rs4765181 | 0.8466926 | 0.983061649 | 0.05765735 | 0.99 (0.9 - 1.09) | |  |  |
| cg15282973 | SCARB1 | rs4597161 | 0.1510375 | 0.754195901 | 0.4458402 | 1.03 (0.99 - 1.08) | |  |  |
| cg27180443 | SCARB1 | rs11834751 | 0.7933984 | 0.973004448 | 0.6569874 | 0.98 (0.82 - 1.17) | |  |  |
| cg16604391 | SCARB1 | rs10744184 | 0.0814648 | 0.680200216 | 0.7955067 | 1.11 (0.99 - 1.24) | |  |  |
| cg06378871 | AACS | rs7311550 | 0.6651449 | 0.950341888 | 0.9387597 | 0.98 (0.91 - 1.06) | |  |  |
| cg15701313 | AACS | rs11058017 | 0.7239661 | 0.961815518 | 0.9411255 | 0.99 (0.92 - 1.06) | |  |  |
| cg23432430 | AACS | rs59272957 | 0.9163981 | 0.992236069 | 0.9503101 | 1 (0.98 - 1.02) | |  |  |
| cg18810033 | AACS | rs12320696 | 0.7304195 | 0.963059146 | 0.9440334 | 0.99 (0.92 - 1.06) | |  |  |
| cg03013422 | AACS | rs12228810 | 0.7629394 | 0.967128265 | 0.9718188 | 0.99 (0.94 - 1.04) | |  |  |
| cg17297045 | AACS | rs57489122 | 0.9792875 | 0.99749749 | 0.672131 | 1 (0.95 - 1.05) | |  |  |
| cg08572757 | AACS | rs57489122 | 0.9792875 | 0.99749749 | 0.7063805 | 1 (0.96 - 1.04) | |  |  |
| cg05364487 | AACS | rs56255932 | 0.08136257 | 0.67998783 | 0.5688699 | 0.93 (0.85 - 1.01) | |  |  |
| cg01618719 | RAN | rs3809142 | 0.7272261 | 0.962846192 | 0.553695 | 1.01 (0.96 - 1.07) | |  |  |
| cg10519460 | RAN | rs11061209 | 0.3040149 | 0.857248999 | 0.7961204 | 1.04 (0.96 - 1.13) | |  |  |
| cg19344878 | RAN | rs6486610 | 0.8522006 | 0.984053173 | 0.2150024 | 1 (0.97 - 1.02) | |  |  |
| cg11356552 | RAN | rs55978830 | 0.506952 | 0.91691468 | 0.7143784 | 1.01 (0.97 - 1.05) | |  |  |
| cg19948019 | TPTE2 | rs17083684 | 0.3834123 | 0.882383062 | 0.3486345 | 1.02 (0.98 - 1.06) | |  |  |
| cg03858448 | TPTE2 | rs75659589 | 0.2078643 | 0.804586293 | 0.3821734 | 1.08 (0.96 - 1.21) | |  |  |
| cg21455901 | CRYL1 | rs9552183 | 0.4921838 | 0.913252814 | 0.8648873 | 1.01 (0.98 - 1.03) | |  |  |
| cg03239422 | CRYL1 | rs9506510 | 0.2208613 | 0.816043259 | 0.6870414 | 0.94 (0.84 - 1.04) | |  |  |
| cg12017061 | ALOX5AP | rs3000632 | 0.7546308 | 0.966870715 | 0.4131898 | 1.01 (0.97 - 1.05) | |  |  |
| cg19953038 | ALOX5AP | rs4073259 | 0.7762521 | 0.969351493 | 0.7981086 | 1 (0.96 - 1.03) | |  |  |
| cg08529529 | ALOX5AP | rs4075473 | 0.3992123 | 0.887037757 | 0.3769983 | 0.95 (0.86 - 1.06) | |  |  |
| cg08375222 | ALOX5AP | rs12429692 | 0.7641199 | 0.967128265 | 0.6576821 | 1.01 (0.93 - 1.1) | |  |  |
| cg00760872 | KL | rs7317020 | 0.2696205 | 0.843477861 | 0.9579846 | 1.03 (0.98 - 1.09) | |  |  |
| cg03667047 | KL | rs495392 | 0.3383156 | 0.867761487 | 0.2802344 | 0.95 (0.85 - 1.06) | |  |  |
| cg09886946 | KL | rs397703 | 0.09423625 | 0.700286564 | 0.4896958 | 0.91 (0.81 - 1.02) | |  |  |
| cg21545902 | KL | rs397703 | 0.08385267 | 0.685550609 | 0.1901815 | 0.95 (0.9 - 1.01) | |  |  |
| cg02796545 | KL | rs495392 | 0.3342109 | 0.866783394 | 0.08092283 | 0.97 (0.92 - 1.03) | |  |  |
| cg23132624 | KL | rs495392 | 0.3362258 | 0.867478077 | 0.08112208 | 0.96 (0.88 - 1.04) | |  |  |
| cg03990139 | DGKH | rs2166626 | 0.1111084 | 0.713163853 | 0.5056607 | 1.09 (0.98 - 1.21) | |  |  |
| cg07025593 | DGKH | rs9594667 | 0.4436319 | 0.900068417 | 0.6542269 | 0.99 (0.96 - 1.02) | |  |  |
| cg21284370 | DGKH | rs11620075 | 0.1447371 | 0.749452533 | 0.5160986 | 0.97 (0.94 - 1.01) | |  |  |
| cg16151959 | DGKH | rs1475326 | 0.944235 | 0.995380968 | 0.6023786 | 1 (0.98 - 1.02) | |  |  |
| cg13818075 | SUCLA2 | rs9534838 | 0.7204496 | 0.96116632 | 0.6833306 | 1.02 (0.92 - 1.13) | |  |  |
| cg05823812 | SUCLA2 | rs7337764 | 0.5330578 | 0.922461336 | 0.8199919 | 1.04 (0.92 - 1.18) | |  |  |
| cg02192281 | SUCLA2 | rs7337764 | 0.5311833 | 0.92186639 | 0.8058043 | 1.02 (0.96 - 1.09) | |  |  |
| cg18708106 | SUCLA2 | rs9316363 | 0.8986043 | 0.990141582 | 0.8402603 | 1.01 (0.89 - 1.14) | |  |  |
| cg05272277 | SUCLA2 | rs9567979 | 0.9949095 | 0.998966109 | 0.6975717 | 1 (0.96 - 1.04) | |  |  |
| cg04403115 | SUCLA2 | rs9567968 | 0.9715257 | 0.997273118 | 0.704997 | 1 (0.93 - 1.08) | |  |  |
| cg08280787 | SUCLA2 | rs9595837 | 0.8971621 | 0.990106178 | 0.5180816 | 1 (0.93 - 1.06) | |  |  |
| cg01732984 | SUCLA2 | rs9316347 | 0.9591676 | 0.996245208 | 0.7806717 | 1 (0.97 - 1.03) | |  |  |
| cg18221580 | SUCLA2 | rs9316347 | 0.9591676 | 0.996245208 | 0.7793355 | 1 (0.97 - 1.03) | |  |  |
| cg06437740 | SUCLA2 | rs9316347 | 0.9591677 | 0.996245208 | 0.6279073 | 1 (0.96 - 1.04) | |  |  |
| cg05969306 | SUCLA2 | rs117361623 | 0.8806906 | 0.986942168 | 0.6026604 | 1.01 (0.94 - 1.08) | |  |  |
| cg06136472 | SUCLA2 | rs9567980 | 0.9840571 | 0.997589045 | 0.5471857 | 1 (0.9 - 1.11) |  |  |  |
| cg13981184 | MED4 | rs9526420 | 0.2814446 | 0.84921423 | 0.2052118 | 0.95 (0.88 - 1.04) | |  |  |
| cg02210115 | CAB39L | rs2407616 | 0.6356999 | 0.94473796 | 0.4523581 | 0.97 (0.86 - 1.1) | |  |  |
| cg11398020 | KLF5 | rs9592879 | 0.005065275 | 0.340421413 | 0.03136704 | 1.08 (1.02 - 1.15) | |  |  |
| cg20524889 | KLF5 | rs9600062 | 0.3238192 | 0.862797422 | 0.09886763 | 1.06 (0.95 - 1.18) | |  |  |
| cg22065124 | KLF5 | rs9600062 | 0.3218042 | 0.862262161 | 0.1423712 | 1.05 (0.96 - 1.15) | |  |  |
| cg06568323 | PCCA | rs11840916 | 0.7344441 | 0.964044429 | 0.187071 | 0.98 (0.88 - 1.09) | |  |  |
| cg26574777 | PCCA | rs9518038 | 0.06280599 | 0.648768221 | 0.8291155 | 1.05 (1 - 1.11) | |  |  |
| cg12145928 | SLC10A2 | rs7987433 | 0.8479382 | 0.983118871 | 0.8794148 | 0.99 (0.9 - 1.09) | |  |  |
| cg22971191 | SLC10A2 | rs279933 | 0.6915637 | 0.956512358 | 0.976035 | 0.98 (0.91 - 1.06) | |  |  |
| cg09042966 | SLC10A2 | rs17292284 | 0.5872023 | 0.935199895 | 0.8545566 | 1.02 (0.94 - 1.11) | |  |  |
| cg24967131 | SLC10A2 | rs16963038 | 0.6863861 | 0.954950662 | 0.5619888 | 1 (0.99 - 1.02) | |  |  |
| cg11879741 | SLC10A2 | rs9586306 | 0.8306769 | 0.979719553 | 0.7571565 | 1.01 (0.93 - 1.1) | |  |  |
| cg14253596 | IRS2 | rs114751070 | 0.398052 | 0.887037757 | 0.3273297 | 0.99 (0.97 - 1.01) | |  |  |
| cg16896868 | IRS2 | rs331976 | 0.8047632 | 0.975011524 | 0.1444142 | 1 (0.97 - 1.04) | |  |  |
| cg24915592 | IRS2 | rs332311 | 0.7640657 | 0.967128265 | 0.1567845 | 1.01 (0.97 - 1.05) | |  |  |
| cg15975806 | IRS2 | rs331976 | 0.8047682 | 0.975011524 | 0.1987536 | 1.01 (0.96 - 1.05) | |  |  |
| cg12689205 | IRS2 | rs9515093 | 0.2515685 | 0.833465562 | 0.6465868 | 1.04 (0.97 - 1.12) | |  |  |
| cg03079818 | IRS2 | rs75403105 | 0.1256063 | 0.730395132 | 0.7962927 | 1.14 (0.96 - 1.35) | |  |  |
| cg18007757 | IRS2 | rs10454540 | 0.1250283 | 0.730338505 | 0.2641161 | 1.04 (0.99 - 1.09) | |  |  |
| cg22410826 | IRS2 | rs1556223 | 0.4883828 | 0.911986446 | 0.3528651 | 1.04 (0.94 - 1.15) | |  |  |
| cg12195446 | IRS2 | rs9521508 | 0.4046736 | 0.888627194 | 0.4275813 | 1.01 (0.99 - 1.03) | |  |  |
| cg12085119 | IRS2 | rs9521510 | 0.2141559 | 0.810487676 | 0.7337275 | 0.96 (0.89 - 1.03) | |  |  |
| cg25924746 | IRS2 | rs9521529 | 0.3494873 | 0.871671988 | 0.3628084 | 1.04 (0.95 - 1.14) | |  |  |
| cg01733904 | IRS2 | rs12583851 | 0.5885342 | 0.935608697 | 0.2855215 | 0.98 (0.9 - 1.06) | |  |  |
| cg03042020 | IRS2 | rs1966240 | 0.3556073 | 0.873049237 | 0.6036165 | 0.96 (0.89 - 1.04) | |  |  |
| cg09460553 | IRS2 | rs336257 | 0.6162474 | 0.941107159 | 0.05780835 | 0.99 (0.95 - 1.03) | |  |  |
| cg02315096 | IRS2 | rs336257 | 0.6162227 | 0.941107159 | 0.05157254 | 0.99 (0.95 - 1.03) | |  |  |
| cg22721998 | IRS2 | rs336257 | 0.6162498 | 0.941107159 | 0.05626641 | 0.99 (0.95 - 1.03) | |  |  |
| cg18865445 | IRS2 | rs336257 | 0.6162094 | 0.941107159 | 0.05480889 | 0.99 (0.95 - 1.03) | |  |  |
| cg17797229 | IRS2 | rs336257 | 0.6161802 | 0.941107159 | 0.05163515 | 0.99 (0.96 - 1.03) | |  |  |
| cg14256028 | IRS2 | rs336216 | 0.9222851 | 0.992834101 | 0.5698575 | 1 (0.95 - 1.05) | |  |  |
| cg05848894 | IRS2 | rs11618031 | 0.9527631 | 0.996245208 | 0.8397506 | 1 (0.98 - 1.02) | |  |  |
| cg13981043 | IRS2 | rs11616850 | 0.5109949 | 0.91691468 | 0.3935578 | 1.04 (0.93 - 1.16) | |  |  |
| cg24201202 | IRS2 | rs9559690 | 0.9315209 | 0.993733866 | 0.8026614 | 1 (0.95 - 1.05) | |  |  |
| cg03523676 | CPNE6 | rs7146599 | 0.3089551 | 0.858070863 | 0.5004283 | 0.96 (0.89 - 1.04) | |  |  |
| cg26408600 | PCK2 | rs7146599 | 0.3094932 | 0.858390421 | 0.5977906 | 1.04 (0.96 - 1.12) | |  |  |
| cg23112188 | PCK2 | rs4982856 | 0.7157946 | 0.960663593 | 0.5464143 | 1.01 (0.98 - 1.04) | |  |  |
| cg22918700 | FITM1 | rs2277483 | 0.4603972 | 0.904455573 | 0.4081174 | 1.03 (0.95 - 1.13) | |  |  |
| cg06429887 | FITM1 | rs2277482 | 0.9258254 | 0.993086627 | 0.4050864 | 1.01 (0.9 - 1.12) | |  |  |
| cg12924956 | FITM1 | rs1134334 | 0.4524873 | 0.902235643 | 0.2708627 | 1.02 (0.97 - 1.07) | |  |  |
| cg10327980 | FITM1 | rs75869105 | 0.3900797 | 0.886056817 | 0.7834933 | 1.03 (0.96 - 1.1) | |  |  |
| cg03047995 | FITM1 | rs10873178 | 0.5024322 | 0.916095255 | 0.2913507 | 1.03 (0.94 - 1.13) | |  |  |
| cg13167816 | FITM1 | rs2277481 | 0.4987964 | 0.915053322 | 0.2846004 | 1.03 (0.95 - 1.12) | |  |  |
| cg02879798 | ADCY4 | rs3181256 | 0.07340733 | 0.668734227 | 0.9300104 | 0.96 (0.93 - 1) | |  |  |
| cg18846074 | ADCY4 | rs3181256 | 0.07201828 | 0.667498098 | 0.9391726 | 0.98 (0.96 - 1) | |  |  |
| cg09822192 | ADCY4 | rs3181256 | 0.07207259 | 0.667498098 | 0.9503211 | 0.98 (0.96 - 1) | |  |  |
| cg26229990 | ADCY4 | rs3181256 | 0.07243722 | 0.66788136 | 0.6646217 | 0.98 (0.95 - 1) | |  |  |
| cg22990158 | ADCY4 | rs751877 | 0.165557 | 0.767732833 | 0.8245278 | 1.02 (0.99 - 1.04) | |  |  |
| cg08218799 | ADCY4 | rs2295300 | 0.1100611 | 0.712358934 | 0.969189 | 1.04 (0.99 - 1.08) | |  |  |
| cg26393630 | PRKD1 | rs6571329 | 0.3847675 | 0.882833158 | 0.05876572 | 1.04 (0.95 - 1.13) | |  |  |
| cg14159970 | PRKD1 | rs178916 | 0.3393798 | 0.868140958 | 0.7188852 | 0.96 (0.89 - 1.04) | |  |  |
| cg00776917 | PRKD1 | rs1956467 | 0.871221 | 0.986520385 | 0.09678185 | 1.01 (0.94 - 1.07) | |  |  |
| cg12126038 | SPTSSA | rs76108873 | 0.651014 | 0.946722187 | 0.248846 | 0.98 (0.9 - 1.07) | |  |  |
| cg06807696 | NFKBIA | rs72666636 | 0.5404632 | 0.923742081 | 0.4100424 | 0.97 (0.89 - 1.06) | |  |  |
| cg04177945 | NFKBIA | rs72666636 | 0.5389889 | 0.92318588 | 0.1939055 | 0.99 (0.96 - 1.02) | |  |  |
| cg14523979 | NFKBIA | rs12432476 | 0.2105104 | 0.807755727 | 0.6682924 | 1.08 (0.96 - 1.23) | |  |  |
| cg19795520 | NFKBIA | rs8015219 | 0.1080696 | 0.711701153 | 0.5353164 | 0.97 (0.94 - 1.01) | |  |  |
| cg03549618 | NFKBIA | rs2145623 | 0.1543643 | 0.757508185 | 0.82138 | 0.98 (0.96 - 1.01) | |  |  |
| cg13710937 | NFKBIA | rs76994542 | 0.4949677 | 0.913917741 | 0.3521607 | 0.97 (0.88 - 1.06) | |  |  |
[truncated: 1,310,575 more chars]
